# Supplementary material for: Asymmetric synthesis of chiral pyrazolo[3,4-b]pyridin-6-ones under carbene catalysis
Source: Royal Society of Chemistry journal article supplement (doi:10.1039/d3ob01057k), 2023-01-01
Supplement: d3ob01057k1.pdf [file d3ob01057k1.pdf]

*Supporting Information for*

**Asymmetric Synthesis of Chiral**

**Pyrazolo[3,4-b]pyridin-6-ones under Carbene Catalysis**

Qianqian Wu,<sup>a,†</sup> Jinna Han,<sup>a,†</sup> Jie Huang,<sup>a,†</sup> Hailong Zhang,<sup>a</sup> Min Ren,<sup>a</sup> Xiaoxiang Zhang,<sup>b</sup> and  
Zhenqian Fu<sup>\*,ac</sup>

<sup>a</sup> Key Laboratory of Flexible Electronics & Institute of Advanced Materials, Nanjing Tech University, 30 South Puzhu Road, Nanjing 211816, China. E-mail: [iamzqfu@njtech.edu.cn](mailto:iamzqfu@njtech.edu.cn).

<sup>b</sup> Jiangsu Co-Innovation Center of Efficient Processing and Utilization of Forest Resources, College of Chemical Engineering, Nanjing Forestry University, Nanjing 210037, China.

<sup>c</sup> Ningbo Institute, Chongqing Technology Innovation Center, Frontiers Science Center for Flexible Electronics (FSCFE), Northwestern Polytechnical University, Xi'an 710072, China.

|            |                                                                                                                                                                                                                                                                                                                                                     |
|------------|-----------------------------------------------------------------------------------------------------------------------------------------------------------------------------------------------------------------------------------------------------------------------------------------------------------------------------------------------------|
| <b>I</b>   | General information                                                                                                                                                                                                                                                                                                                                 |
| <b>II</b>  | a) Synthesis of 5-aminopyrazoles <b>1</b><br>b) General experimental procedure for the synthesis of enals <b>2</b><br>c) General procedure for the reactions of <b>1</b> with <b>2</b> to synthesize products <b>3</b><br>d) General experimental procedure for the synthesis of <b>4</b> or <b>5</b><br>e) Determination of absolute configuration |
| <b>III</b> | a) Characterizations of products<br>b) References                                                                                                                                                                                                                                                                                                   |
| <b>IV</b>  | <sup>1</sup> H, <sup>13</sup> C, <sup>19</sup> F NMR spectra and HPLC data of products                                                                                                                                                                                                                                                              |

## I. General Information

Commercially available materials were purchased from Alfa Aesar and Sigma-Aldrich. THF was distilled over sodium. Other solvents were dried over 4Å molecular sieve prior use. Proton nuclear magnetic resonance ( $^1\text{H}$  NMR) spectra were recorded on a Bruker (400 MHz) spectrometer. Chemical shifts were recorded in parts per million (ppm,  $\delta$ ) relative to tetramethylsilane ( $\delta$  0.00) or chloroform ( $\delta$  = 7.26, singlet).  $^1\text{H}$  NMR splitting patterns are designated as singlet (s), doublet (d), triplet (t), quartet (q), doublet of doublets (dd), triplet of doublets (dt), triplet of triplets (tt), multiplets (m), and etc. All first-order splitting patterns were assigned on the basis of the appearance of the multiplet. Splitting patterns that could not be easily interpreted are designated as multiplet (m) or broad (br). Carbon nuclear magnetic resonance ( $^{13}\text{C}$  NMR) spectra were recorded on a Bruker (400 MHz) (100 MHz) spectrometer. High resolution mass spectral analysis (HRMS) was performed on a Waters Q–TOF Premier Spectrometer. The determination of enantiomeric excess was performed *via* chiral HPLC analysis using Shimadzu LC-20AD HPLC workstation. X-ray crystallography analysis was performed on Bruker X8 APEX X-ray diffractionmeter. Optical rotations were measured using a 1 mL cell with a 1 dm path length on a Jasco P-1030 polarimeter and are reported as follows:  $[\alpha]_{\text{D}}^{\text{rt}}$  ( $c$  is in gm per 100 mL solvent). Analytical thin-layer chromatography (TLC) was carried out on Merck 60 F254 pre-coated silica gel plate (0.2 mm thickness).

## II. General procedure

### a) General experimental procedure for the synthesis of 5-aminopyrazoles 1

#### Method 1

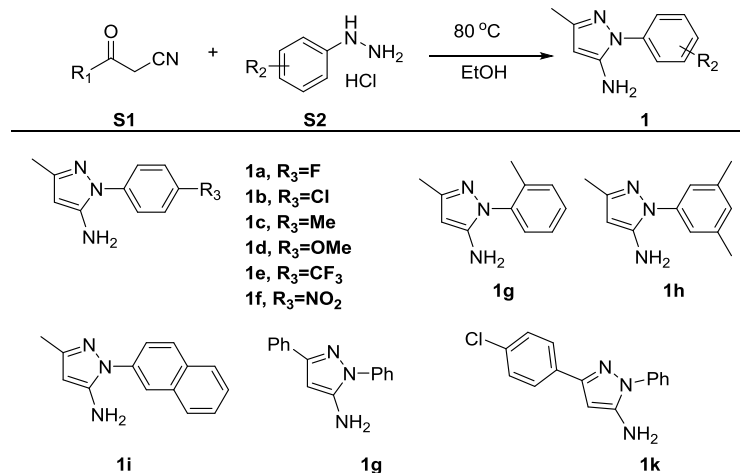

**S1** (4.5 mmol, 0.9 equiv) was added to the suspension of **S2** (5 mmol, 1.0 equiv.) in EtOH (15 ml), the reaction mixture then was stirred at 80 °C for 18 h. After completion of the reaction (monitored by TLC), EtOH was concentrated in vacuo and then was diluted with EtOAc (30.0 mL) and 15% NaOH (30.0 mL). Then the mixture was extracted with EtOAc (3 × 20.0 mL), and the combined organic layers were washed with brine, dried over Na<sub>2</sub>SO<sub>4</sub>, and concentrated in vacuo. The crude residue was purified via column chromatography on silica gel (PE/Ea = 5 /1) to afford compounds **S3**.

#### Method 2.

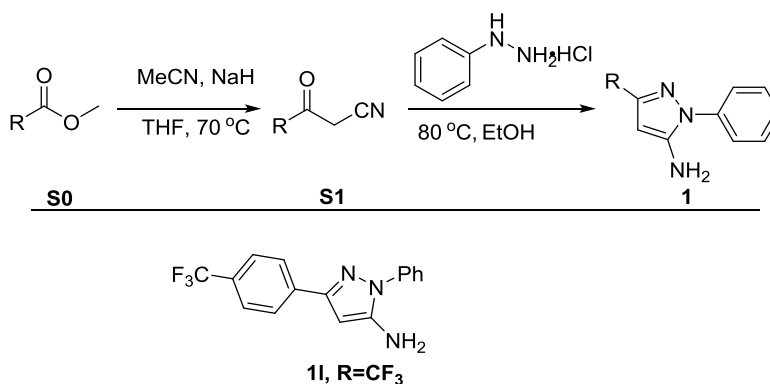

To a suspension of NaH (10 mmol, 2.0 equiv.) in anhydrous THF (20 mL) at 0 °C was added acetonitrile (15 mmol, 3.0 equiv.) and ester **S0** (5 mmol, 1.0 equiv.) under

N<sub>2</sub> atmosphere, the reaction mixture was stirred at 70 °C for 5 h. After completion of the reaction (monitored by TLC), the reaction mixture was cooled to 0 °C, pH of the solution was adjusted to neutral by 1M HCl (aq.) and extracted with ethyl acetate. The organic layer was dried with anhydrous Na<sub>2</sub>SO<sub>4</sub>, and concentrated under reduced pressure. The crude product was purified by column chromatography on silica gel to afford compound **S1** as a white solid.

According to **Method 1**, the reactions of **S1** with phenylhydrazine hydrochloride to synthesize of **11**.

### b) General experimental procedure for the synthesis of enals **2**

Enals were synthesized according to the literature [1-5]. To a dried 50 mL flask was added formylmethylene triphenylphosphorane (1.521 g, 5 mmol), aldehydes (7 mmol) and 25 mL toluene. The mixture was refluxed overnight (detected by TLC), and then the solvent was removed under reduced pressure. The residue was purified by silicacolumn chromatography to afford the product enals.

### c) General procedure for the reactions of **1** with **2** to synthesize products **3**

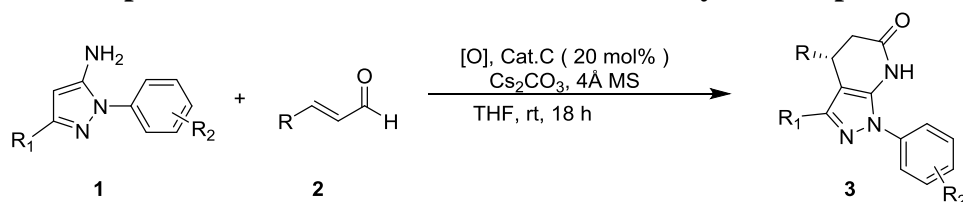

To a dried 10 mL Schlenk tube equipped with a tiny magnetic stir bar was added **1** (0.1 mmol, 1.0 equiv.), **2** (0.2 mmol, 2.0 equiv.), Cat.C (0.02 mmol, 0.2 equiv.), 4Å MS (50 mg), DQ (0.2 mmol, 2.0 equiv) and Cs<sub>2</sub>CO<sub>3</sub> (0.2 mmol, 2.0 equiv.). To this mixture was added dry THF (1.0 mL), and then the reaction mixture was stirred at 30 °C for 18 hours. The reaction mixture was purified by flash column chromatography on silica gel to afford product **3**.

### d) General experimental procedure for the synthesis of **4** or **5**

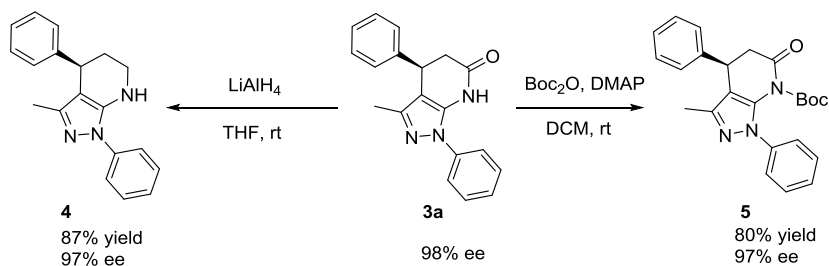

**Procedure for the synthesis of compound 4:**

To a dried 10 mL Schlenk tube equipped with a tiny magnetic stir bar was added **3a** (0.1 mmol) and anhydrous THF (1 mL). The reaction mixture was cooled to 0 °C and added LiAlH<sub>4</sub> (0.4 mmol, 4.0 equiv) in portions, then the reaction mixture was stirred at 30 °C for 5 h. After completion of the reaction (monitored by TLC), the reaction mixture was quenched by water (3.0 mL) and extracted with ethyl acetate (5.0 mL × 3), the combined organic phase washed with brine, dried over Na<sub>2</sub>SO<sub>4</sub>, and concentrated in vacuum. The crude product was purified by column chromatography on silica gel to afford to give **4** as white solid (87% yield, 97% ee).

**Procedure for the synthesis of compound 5:**

To a dried 10 mL Schlenk tube equipped with a tiny magnetic stir bar was added **3a** (0.10 mmol), DMAP (0.01 mmol, 0.1 equiv) and anhydrous THF (1.0 mL). To the reaction mixture was added Di-tert-butyl (0.15 mmol, 1.5 equiv), then the reaction mixture was stirred at 30 °C for overnight. After completion of the reaction (monitored by TLC), the reaction mixture was diluted with saturated salt water (5.0 mL) and extracted with ethyl acetate (5.0 mL × 3), the combined organic phase washed with brine, dried over Na<sub>2</sub>SO<sub>4</sub>, and concentrated in vacuum. The crude product was purified by column chromatography on silica gel to afford to give **5** as white solid (80% yield, 97% ee).

e) Determination of absolute configuration for the product 3.

|            |           | Chromatographic column | ee(%) | Ret. Time                                           | Molecular configuration                                                                                |
|------------|-----------|------------------------|-------|-----------------------------------------------------|--------------------------------------------------------------------------------------------------------|
| This work  | <b>3n</b> | Chiralpak IC           | 98    | $t_R$ (major) = 13.1 min, $t_R$ (minor) = 21.8 min) | 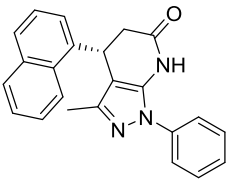 <p><b>3n</b></p>   |
|            | <b>3s</b> | Chiralpak IC           | 99    | $t_R$ (major) = 13.4 min, $t_R$ (minor) = 17.4 min) |  <p><b>3s</b></p>   |
| Wang group | <b>3o</b> | Chiralpak IC           | 91    | tR(major) = 23.752 min, tR(minor) = 13.695 min.)    |  <p><b>3o</b></p>  |
|            | <b>4a</b> | Chiralpak IC           | 95    | tR(major) = 18.836 min, tR(minor) = 14.342 min.)    |  <p><b>4a</b></p> |

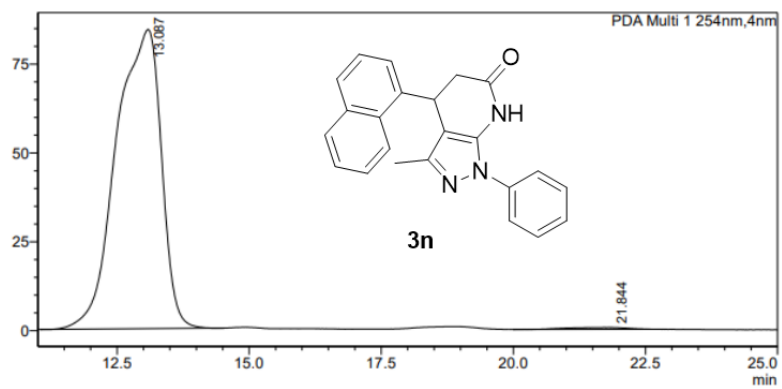

<Peak Table>

| Peak# | Ret. Time | Area    | Area%   | Height |
|-------|-----------|---------|---------|--------|
| 1     | 13.087    | 4992892 | 99.117  | 84204  |
| 2     | 21.844    | 44481   | 0.883   | 539    |
| Total |           | 5037373 | 100.000 | 84743  |

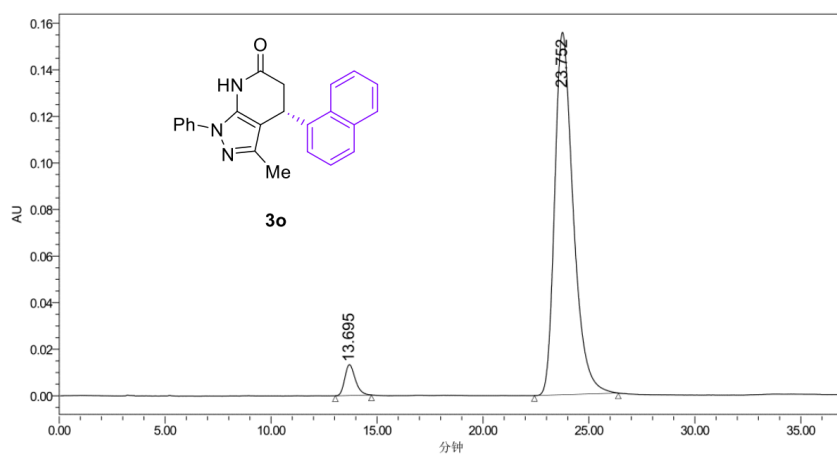

| Peak  | Ret. Time | Area    | Height | Area%  | Height% |
|-------|-----------|---------|--------|--------|---------|
| 1     | 13.695    | 459395  | 13267  | 4.63   | 7.85    |
| 2     | 23.752    | 9463916 | 155655 | 95.37  | 92.15   |
| Total |           | 9923311 | 168922 | 100.00 | 100.00  |

S128

<Chromatogram>

mAU

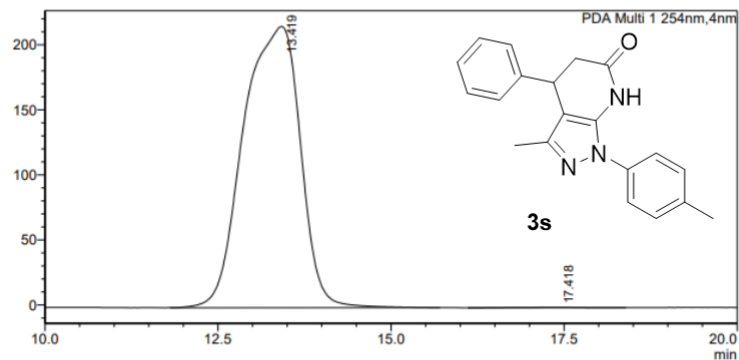

<Peak Table>

| Peak# | Ret. Time | Area     | Area%   | Height |
|-------|-----------|----------|---------|--------|
| 1     | 13.419    | 12367851 | 99.817  | 216289 |
| 2     | 17.418    | 22701    | 0.183   | 376    |
| Total |           | 12390552 | 100.000 | 216665 |

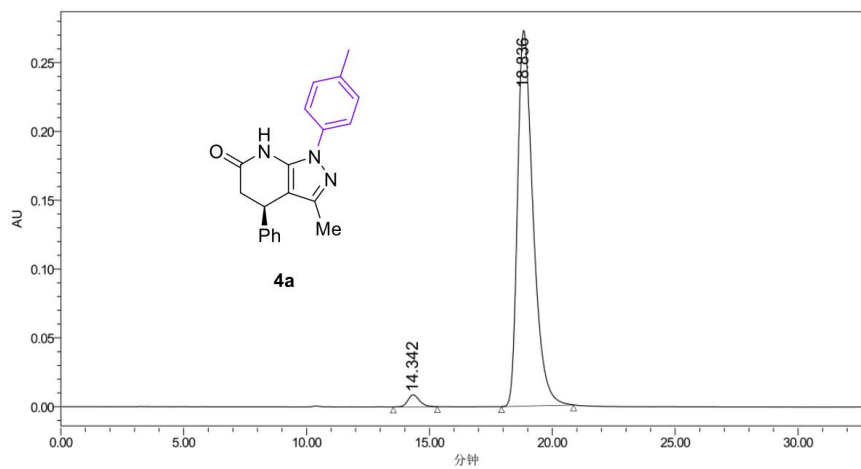

| Peak  | Ret. Time | Area     | Height | Area%  | Height% |
|-------|-----------|----------|--------|--------|---------|
| 1     | 14.342    | 288443   | 8755   | 2.35   | 3.11    |
| 2     | 18.836    | 12010864 | 272974 | 97.65  | 96.89   |
| Total |           | 12299307 | 281729 | 100.00 | 100.00  |

S134



### III. Characterizations of products, reference

Structures of known compounds were confirmed by NMR spectral comparison with literature data. The compound not reported before,  $^1\text{H}$  NMR and  $^{13}\text{C}$  NMR characterization and the corresponding spectra are provided.

#### a) Characterizations of Products

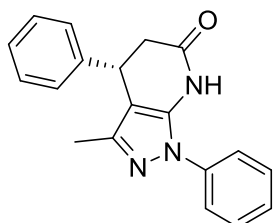

3a

#### (S)-3-methyl-1,4-diphenyl-1,4,5,7-tetrahydro-6H-pyrazolo[3,4-b]pyridin-6-one :

96% yield, 99% ee;  $[\alpha]_{\text{D}}^{25} = -76.4$  (c=1.0 in  $\text{CHCl}_3$ ).

**HPLC condition:** Chiralpak AZH (Hex/iPrOH = 90/10, 1.0 mL/min,  $t_{\text{R}}$  (major) = 16.0 min,  $t_{\text{R}}$  (minor) = 22.9 min).

$^1\text{H}$  NMR (400 MHz,  $\text{CDCl}_3$ )  $\delta$  8.21 (s, 1H), 7.46(d,  $J = 4.0$  Hz, 4H), 7.35-7.31 (m, 3H), 7.28-7.21 (m, 3H), 4.21 (t,  $J = 6.8$  Hz 1H), 3.04 (dd,  $J = 8.8$  Hz,  $J = 16.0$  Hz, 1H), 3.04 (dd,  $J = 6.8$  Hz,  $J = 16.4$  Hz, 1H), 1.94 (s, 3H);  $^{13}\text{C}$  NMR (100 MHz,  $\text{CDCl}_3$ )  $\delta$  170.2, 147.0, 142.4, 137.5, 137.5, 129.9, 129.1, 127.8, 127.4, 127.3, 123.1, 102.8, 40.7, 35.5, 12.6.; **HRMS** (ESI) Calcd for  $\text{C}_{19}\text{H}_{18}\text{N}_3\text{O}^+$   $[\text{M}+\text{H}]^+$ : 304.1444, found: 304.1448.

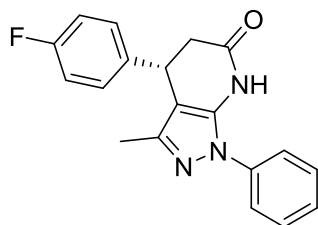

3b

#### (S)-4-(4-fluorophenyl)-3-methyl-1-phenyl-1,4,5,7-tetrahydro-6H-pyrazolo[3,4-b]pyridin-6-on

e: 85% yield, 98% ee;  $[\alpha]_{\text{D}}^{25} = -24.0$  (c=1.0 in  $\text{CHCl}_3$ ).

**HPLC condition:** Chiralpak AZH (Hex/iPrOH = 90/10, 1.0 mL/min,  $t_{\text{R}}$  (major) = 14.7 min,  $t_{\text{R}}$  (minor) = 22.3 min).

$^1\text{H}$  NMR (400 MHz,  $\text{CDCl}_3$ )  $\delta$  7.93 (s, 1H), 7.51-7.45 (m, 4H), 7.39-7.35 (m, 1H), 7.20-7.15 (m, 2H), 7.02 (t,  $J = 8.8$  Hz 2H), 4.22 (t,  $J = 6.8$  Hz, 1H), 3.04 (dd,  $J = 7.2$  Hz,  $J = 16.4$  Hz, 1H), 2.80 (dd,  $J = 6.4$  Hz,  $J = 16.4$  Hz, 1H), 1.95 (s, 3H);  $^{13}\text{C}$  NMR (100 MHz,  $\text{CDCl}_3$ )  $\delta$  169.7, 163.3, 160.8, 146.9, 138.0, 137.4(d,  $J = 17.2$  Hz), 137.4, 130.0, 128.8 (d,  $J = 8.0$  Hz), 128.0, 123.0, 115.9 (d,  $J = 21.2$  Hz), 102.7, 40.9, 34.8, 12.6.;  $^{19}\text{F}$  NMR (376 MHz,  $\text{CDCl}_3$ )  $\delta$  -125.2.; **HRMS** (ESI) Calcd for  $\text{C}_{19}\text{H}_{17}\text{FN}_3\text{O}^+$   $[\text{M}+\text{H}]^+$ : 322.1350, found: 322.1352.;

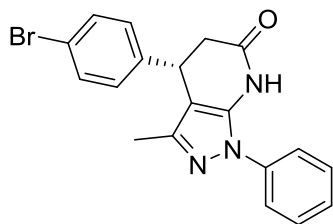

**3c**

**(S)-4-(4-bromophenyl)-3-methyl-1-phenyl-1,4,5,7-tetrahydro-6H-pyrazolo[3,4-b]pyridin-6-one:** 98% yield, 99% ee;  $[\alpha]_D^{25} = -56.8$  (c=1.0 in  $\text{CHCl}_3$ ).

**HPLC condition:** Chiralpak AZH (Hex/iPrOH = 90/10, 1.0 mL/min,  $t_R$  (major) = 17.1 min,  $t_R$  (minor) = 21.3 min).

**$^1\text{H}$  NMR** (400 MHz,  $\text{CDCl}_3$ )  $\delta$  8.23 (s, 1H), 7.49-7.44 (m, 6H), 7.38-7.33 (m, 1H), 7.09 (d,  $J = 8.4$  Hz, 2H), 4.18 (t,  $J = 6.8$  Hz, 1H), 3.03 (dd,  $J = 7.2$  Hz,  $J = 16.0$  Hz, 1H), 2.76 (dd,  $J = 6.4$  Hz,  $J = 16.4$  Hz, 1H), 1.95 (s, 3H);  **$^{13}\text{C}$  NMR** (100 MHz,  $\text{CDCl}_3$ )  $\delta$  169.8, 146.8, 141.4, 137.6, 137.4, 132.2, 129.9, 129.0, 127.9, 123.1, 121.2, 102.2, 40.6, 35.0, 12.6.; **HRMS** (ESI) Calcd for  $\text{C}_{19}\text{H}_{17}\text{BrN}_3\text{O}^+$   $[\text{M}+\text{H}]^+$ : 382.0550, found: 382.0546.;

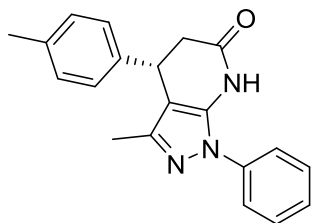

**3d**

**(S)-3-methyl-1-phenyl-4-(p-tolyl)-1,4,5,7-tetrahydro-6H-pyrazolo[3,4-b]pyridin-6-one:** 97% yield, 99% ee;  $[\alpha]_D^{25} = -110.8$  (c=1.0 in  $\text{CHCl}_3$ ).

**HPLC condition:** Chiralpak AZH (Hex/iPrOH = 90/10, 1.0 mL/min,  $t_R$  (major) = 13.0 min,  $t_R$  (minor) = 19.6 min).

**$^1\text{H}$  NMR** (400 MHz,  $\text{CDCl}_3$ )  $\delta$  8.25 (s, 1H), 7.47-7.43 (m, 4H), 7.36-7.32 (m, 1H), 7.12 (dd,  $J = 8.4$  Hz,  $J = 13.2$  Hz, 4H), 4.17 (t,  $J = 7.2$  Hz, 1H), 3.01 (dd,  $J = 7.2$  Hz,  $J = 16.0$  Hz, 1H), 2.81 (dd,  $J = 6.4$  Hz,  $J = 16.4$  Hz, 1H), 2.33 (s, 3H), 1.95 (s, 3H);  **$^{13}\text{C}$  NMR** (100 MHz,  $\text{CDCl}_3$ )  $\delta$  170.2, 147.0, 139.3, 137.5, 137.4, 137.0, 129.9, 129.7, 127.8, 127.1, 123.0, 103.1, 40.8, 35.1, 21.2, 12.6.; **HRMS** (ESI) Calcd for  $\text{C}_{20}\text{H}_{20}\text{N}_3\text{O}^+$   $[\text{M}+\text{H}]^+$ : 318.1601, found: 318.1602.;

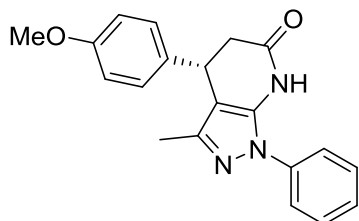

**3e**

**(S)-4-(4-methoxyphenyl)-3-methyl-1-phenyl-1,4,5,7-tetrahydro-6H-pyrazolo[3,4-b]pyridin-6-one:** 93% yield, 99% ee;  $[\alpha]_D^{25} = -63.8$  (c=1.0 in  $\text{CHCl}_3$ ).

**HPLC condition:** Chiralpak AZH (Hex/iPrOH = 95/5, 1.0 mL/min,  $t_R$  (major) = 44.6 min,  $t_R$  (minor) = 52.3 min).

**$^1\text{H}$  NMR** (400 MHz,  $\text{CDCl}_3$ )  $\delta$  8.09 (s, 1H), 7.49-7.44 (m, 4H), 7.37-7.32 (m, 1H), 7.13 (d,  $J = 8.8$  Hz, 2H), 6.86 (d,  $J = 8.8$  Hz, 2H), 4.18 (t,  $J = 6.8$  Hz, 1H), 3.79 (s, 3H), 3.00 (dd,  $J = 7.2$  Hz,  $J = 16.4$  Hz, 1H), 2.80 (dd,  $J = 6.8$  Hz,  $J = 16.4$  Hz, 1H), 1.95 (s, 3H);  **$^{13}\text{C}$  NMR** (100 MHz,  $\text{CDCl}_3$ )  $\delta$  170.2, 158.8, 147.0, 137.5, 137.4, 134.3, 129.9, 128.3, 127.8, 123.0, 114.4, 103.2, 55.4, 40.9, 34.7, 12.6.; **HRMS** (ESI) Calcd for  $\text{C}_{20}\text{H}_{20}\text{N}_3\text{O}_2^+$   $[\text{M}+\text{H}]^+$ : 334.1550, found: 334.1555.;

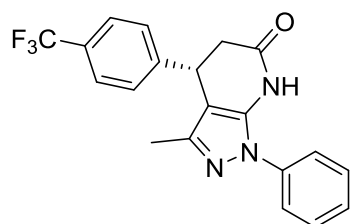

**3f**

**(S)-3-methyl-1-phenyl-4-(4-(trifluoromethyl)phenyl)-1,4,5,7-tetrahydro-6H-pyrazolo[3,4-b]pyridin-6-one:** 95% yield, 99% ee;  $[\alpha]_D^{25} = -83.8$  ( $c=1.0$  in  $\text{CHCl}_3$ ).

**HPLC condition:** Chiralpak IC (Hex/iPrOH = 95/5, 1.0 mL/min,  $t_R$  (major) = 26.8 min,  $t_R$  (minor) = 36.7 min).

**$^1\text{H}$  NMR** (400 MHz,  $\text{CDCl}_3$ )  $\delta$  8.21 (s, 1H), 7.59 (d,  $J = 8.8$  Hz, 2H), 7.48-7.45 (m, 4H), 7.39-7.32 (m, 3H), 4.29 (t,  $J = 6.0$  Hz, 1H), 3.07 (dd,  $J = 7.2$  Hz,  $J = 16.0$  Hz, 1H), 2.80 (dd,  $J = 6.0$  Hz,  $J = 16.4$  Hz, 1H), 1.96 (s, 3H);  **$^{13}\text{C}$  NMR** (100 MHz,  $\text{CDCl}_3$ )  $\delta$  169.5, 146.8, 146.5, 137.5 (d,  $J = 30.0$  Hz), 123.0, 128.0, 127.6, 126.1 (q,  $J = 3.8$  Hz), 125.5, 123.1, 122.8, 101.9, 40.4, 35.3, 12.6.  **$^{19}\text{F}$  NMR** (376 MHz,  $\text{CDCl}_3$ )  $\delta$  -62.31.; **HRMS** (ESI) Calcd for  $\text{C}_{20}\text{H}_{17}\text{F}_3\text{N}_3\text{O}^+$   $[\text{M}+\text{H}]^+$ : 372.1318, found: 372.1320.;

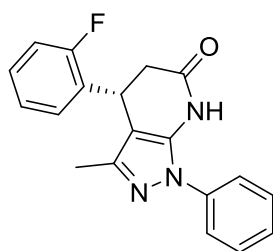

**3g**

**(R)-4-(2-fluorophenyl)-3-methyl-1-phenyl-1,4,5,7-tetrahydro-6H-pyrazolo[3,4-b]pyridin-6-one:** 96% yield, 97% ee;  $[\alpha]_D^{25} = -112.4$  ( $c=1.0$  in  $\text{CHCl}_3$ ).

**HPLC condition:** Chiralpak AZH (Hex/iPrOH = 90/10, 1.0 mL/min,  $t_R$  (major) = 15.3 min,  $t_R$  (minor) = 40.0 min).

**$^1\text{H}$  NMR** (400 MHz,  $\text{CDCl}_3$ )  $\delta$  8.29 (s, 1H), 7.46 (d,  $J = 4.4$  Hz, 4H), 7.38-7.33 (m, 1H), 7.26-7.21 (m, 1H), 7.10-7.02 (m, 3H), 4.60-4.52 (m, 1H), 3.06 (dd,  $J = 8.0$  Hz,  $J = 16.4$  Hz, 1H), 2.83 (dd,  $J = 4.8$  Hz,  $J = 16.4$  Hz, 1H), 2.00 (s, 3H);  **$^{13}\text{C}$  NMR** (100 MHz,  $\text{CDCl}_3$ )  $\delta$  169.9, 161.8, 159.3, 146.9, 137.9, 137.4, 129.9, 129.1 (d,  $J = 8.7$  Hz), 128.6 (d,  $J = 4.2$  Hz), 128.0, 124.6 (d,  $J = 3.6$  Hz), 123.1, 115.9 (d,  $J = 21.9$  Hz),

101.2, 38.9, 28.6, 12.3.  $^{19}\text{F}$  NMR (376 MHz,  $\text{CDCl}_3$ )  $\delta$  -118.08.; HRMS (ESI) Calcd for  $\text{C}_{19}\text{H}_{17}\text{FN}_3\text{O}^+$   $[\text{M}+\text{H}]^+$ : 322.1350, found: 322.1355.;

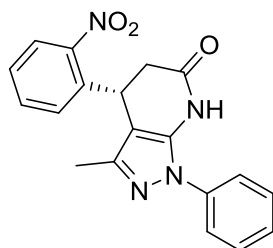

3h

**(S)-3-methyl-4-(2-nitrophenyl)-1-phenyl-1,4,5,7-tetrahydro-6H-pyrazolo[3,4-b]pyridin-6-one:** 95% yield, 98% ee;  $[\alpha]_{\text{D}}^{25} = -117.8$  (c=1.0 in  $\text{CHCl}_3$ ).

**HPLC condition:** Chiralpak IA (Hex/iPrOH = 90/10, 1.0 mL/min,  $t_{\text{R}}$  (major) = 17.4 min,  $t_{\text{R}}$  (minor) = 27.3 min).

$^1\text{H}$  NMR (400 MHz,  $\text{CDCl}_3$ )  $\delta$  8.30 (s, 1H), 7.94 (d,  $J = 8.4$  Hz, 1H), 7.53 (t,  $J = 7.2$  Hz, 1H), 7.49-7.46 (m, 4H), 7.45-7.42 (m, 1H), 7.41-7.35 (m, 1H), 7.28-7.27 (m, 1H), 4.88-4.84 (m, 1H), 3.23 (dd,  $J = 8.0$  Hz,  $J = 16.8$  Hz, 1H), 2.83 (dd,  $J = 5.6$  Hz,  $J = 16.8$  Hz, 1H), 1.89 (s, 3H);  $^{13}\text{C}$  NMR (100 MHz,  $\text{CDCl}_3$ )  $\delta$  169.3, 149.0, 146.8, 138.4, 137.3, 137.0, 133.7, 123.0, 129.6, 128.4, 128.1, 125.1, 123.1, 101.2, 39.8, 30.4, 12.4.; HRMS (ESI) Calcd for  $\text{C}_{19}\text{H}_{16}\text{N}_4\text{NaO}_3^+$   $[\text{M}+\text{Na}]^+$ : 371.1115, found: 371.1112.;

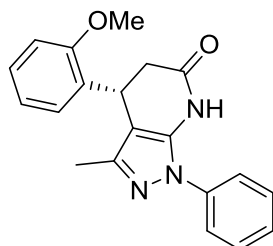

3i

**(R)-4-(2-methoxyphenyl)-3-methyl-1-phenyl-1,4,5,7-tetrahydro-6H-pyrazolo[3,4-b]pyridin-6-one:** 70% yield, 98% ee;  $[\alpha]_{\text{D}}^{25} = -39.0$  (c=1.0 in  $\text{CHCl}_3$ ).

**HPLC condition:** Chiralpak IA (Hex/iPrOH = 95/5, 1.0 mL/min,  $t_{\text{R}}$  (major) = 19.6 min,  $t_{\text{R}}$  (minor) = 24.4 min).

$^1\text{H}$  NMR (400 MHz,  $\text{CDCl}_3$ )  $\delta$  7.81 (s, 1H), 7.49-7.46 (m, 4H), 7.39-7.34 (m, 1H), 7.23 (t,  $J = 7.6$  Hz, 1H), 6.98 (d,  $J = 7.6$  Hz, 1H), 7.90-7.84 (m, 2H), 4.53 (q,  $J = 4.4$  Hz, 1H), 3.83 (s, 3H), 3.04 (dd,  $J = 8.0$  Hz,  $J = 16.4$  Hz, 1H), 2.85 (dd,  $J = 3.6$  Hz,  $J = 16.4$  Hz, 1H), 2.02 (s, 3H);  $^{13}\text{C}$  NMR (100 MHz,  $\text{CDCl}_3$ )  $\delta$  170.5, 156.9, 147.1, 137.9, 137.6, 130.1, 123.0, 128.4, 128.1, 127.7, 122.9, 120.7, 110.8, 101.9, 55.1, 38.5, 29.8, 12.4.; HRMS (ESI) Calcd for  $\text{C}_{20}\text{H}_{20}\text{N}_3\text{O}_2^+$   $[\text{M}+\text{H}]^+$ : 334.1550, found: 334.1555.;

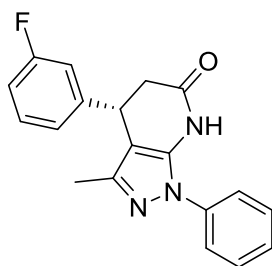

3j

**(S)-4-(3-fluorophenyl)-3-methyl-1-phenyl-1,4,5,7-tetrahydro-6H-pyrazolo[3,4-b]pyridin-6-one:** 89% yield, 98% ee;  $[\alpha]_D^{25} = -48.0$  (c=1.0 in  $\text{CHCl}_3$ ).

**HPLC condition:** Chiralpak IB (Hex/iPrOH = 95/5, 1.0 mL/min,  $t_R$  (major) = 24.5 min,  $t_R$  (minor) = 31.5 min).

**$^1\text{H NMR}$**  (400 MHz,  $\text{CDCl}_3$ )  $\delta$  8.09 (s, 1H), 7.50-7.45 (m, 4H), 7.39-7.34 (m, 1H), 7.33-7.27 (m, 1H), 7.02-6.88 (m, 3H), 4.22 (t,  $J = 7.2$  Hz, 1H), 3.06 (dd,  $J = 7.6$  Hz,  $J = 16.0$  Hz, 1H), 2.81 (dd,  $J = 6.0$  Hz,  $J = 16.4$  Hz, 1H), 1.98 (s, 3H);  **$^{13}\text{C NMR}$**  (100 MHz,  $\text{CDCl}_3$ )  $\delta$  169.6, 164.5, 162.1, 146.9, 145.0 (d,  $J = 6.5$  Hz), 137.6, 137.4, 130.7 (d,  $J = 8.2$  Hz), 123.0, 128.0, 123.1, 122.9 (d,  $J = 2.8$  Hz), 114.5, 114.3 (d,  $J = 6.6$  Hz), 114.1, 102.2, 40.5, 35.2, 12.6.  **$^{19}\text{F NMR}$**  (376 MHz,  $\text{CDCl}_3$ )  $\delta$  -112.09.; **HRMS** (ESI) Calcd for  $\text{C}_{19}\text{H}_{17}\text{FN}_3\text{O}^+$   $[\text{M}+\text{H}]^+$ : 322.1350, found: 322.1353.;

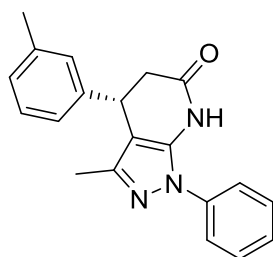

3k

**(S)-3-methyl-1-phenyl-4-(m-tolyl)-1,4,5,7-tetrahydro-6H-pyrazolo[3,4-b]pyridin-6-one:** 83% yield, 98% ee;  $[\alpha]_D^{25} = -50.4$  (c=1.0 in  $\text{CHCl}_3$ ).

**HPLC condition:** Chiralpak IC (Hex/iPrOH = 90/10, 1.0 mL/min,  $t_R$  (major) = 19.2 min,  $t_R$  (minor) = 27.0 min).

**$^1\text{H NMR}$**  (400 MHz,  $\text{CDCl}_3$ )  $\delta$  7.95 (s, 1H), 7.48-7.47 (m, 4H), 7.38-7.34 (m, 1H), 7.21 (t,  $J = 3.2$  Hz, 1H), 7.08-7.00 (m, 3H), 4.18 (t,  $J = 6.8$  Hz, 1H), 3.04 (dd,  $J = 7.2$  Hz,  $J = 16.0$  Hz, 1H), 2.84 (dd,  $J = 6.4$  Hz,  $J = 16.4$  Hz, 1H), 2.34 (s, 3H), 1.95 (s, 3H);  **$^{13}\text{C NMR}$**  (100 MHz,  $\text{CDCl}_3$ )  $\delta$  170.1, 147.0, 142.3, 138.7, 137.5, 137.4, 123.0, 128.9, 128.1, 127.9, 127.9, 124.3, 123.0, 102.9, 40.7, 35.5, 21.6, 12.6. **HRMS** (ESI) Calcd for  $\text{C}_{20}\text{H}_{19}\text{N}_3\text{NaO}^+$   $[\text{M}+\text{Na}]^+$ : 340.1420, found: 340.1424.;

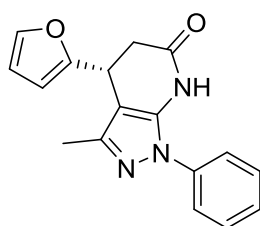

3l

**(R)-4-(furan-2-yl)-3-methyl-1-phenyl-1,4,5,7-tetrahydro-6H-pyrazolo[3,4-b]pyridin-6-one:** 93% yield, 98% ee;  $[\alpha]_D^{25} = -46.6$  (c=1.0 in CHCl<sub>3</sub>).

**HPLC condition:** Chiralpak AZH (Hex/iPrOH = 95/5, 1.0 mL/min, t<sub>R</sub> (major) = 45.0 min, t<sub>R</sub> (minor) = 56.8 min).

**<sup>1</sup>H NMR** (400 MHz, CDCl<sub>3</sub>) δ 7.95 (s, 1H), 7.49-7.42 (m, 4H), 7.38-7.33 (m, 2H), 6.28-6.26 (m, 1H), 6.03 (d, *J* = 3.2 Hz, 1H), 4.29-4.26 (m, 1H), 3.05-2.94 (m, 2H), 2.17 (s, 3H); **<sup>13</sup>C NMR** (100 MHz, CDCl<sub>3</sub>) δ 169.6, 154.6, 146.8, 142.3, 137.4, 137.4, 129.9, 127.9, 123.0, 110.3, 105.8, 100.9, 37.0, 28.9, 12.1. **HRMS** (ESI) Calcd for C<sub>17</sub>H<sub>16</sub>N<sub>3</sub>O<sub>2</sub><sup>+</sup> [M+H]<sup>+</sup>: 294.1237, found: 294.1240.;

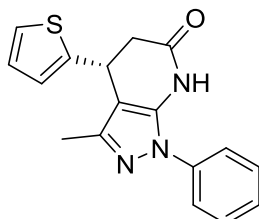

**3m**

**(R)-3-methyl-1-phenyl-4-(thiophen-2-yl)-1,4,5,7-tetrahydro-6H-pyrazolo[3,4-b]pyridin-6-one:** 91% yield, 99% ee;  $[\alpha]_D^{25} = -42.8$  (c=1.0 in CHCl<sub>3</sub>).

**HPLC condition:** Chiralpak AZH (Hex/iPrOH = 90/10, 1.0 mL/min, t<sub>R</sub> (major) = 19.3 min, t<sub>R</sub> (minor) = 33.8 min).

**<sup>1</sup>H NMR** (400 MHz, CDCl<sub>3</sub>) δ 8.07 (s, 1H), 7.49-7.42 (m, 4H), 7.38-7.33 (m, 1H), 7.19-7.17 (m, 1H), 6.94-6.91 (m, 1H), 6.85-6.83 (m, 1H), 4.51-4.47 (m, 1H), 3.09 (dd, *J* = 7.2 Hz, *J* = 16.4 Hz, 1H), 2.95 (dd, *J* = 4.8 Hz, *J* = 16.4 Hz, 1H), 2.14 (s, 3H); **<sup>13</sup>C NMR** (100 MHz, CDCl<sub>3</sub>) δ 169.5, 146.6, 146.4, 137.4, 137.2, 123.0, 128.0, 127.1, 124.5, 124.3, 123.1, 103.3, 41.0, 30.5, 12.4. **HRMS** (ESI) Calcd for C<sub>17</sub>H<sub>16</sub>N<sub>3</sub>OS<sup>+</sup> [M+H]<sup>+</sup>: 310.1009, found: 310.1010.;

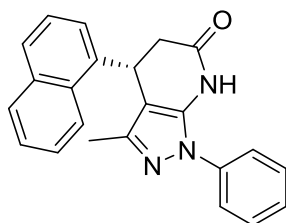

**3n**

**(S)-3-methyl-4-(naphthalen-1-yl)-1-phenyl-1,4,5,7-tetrahydro-6H-pyrazolo[3,4-b]pyridin-6-one:** 89% yield, 98% ee;  $[\alpha]_D^{25} = -69.2$  (c=1.0 in CHCl<sub>3</sub>).

**HPLC condition:** Chiralpak IC (Hex/iPrOH = 80/20, 1.0 mL/min, t<sub>R</sub> (major) = 13.1 min, t<sub>R</sub> (minor) = 21.8 min).

**<sup>1</sup>H NMR** (400 MHz, CDCl<sub>3</sub>) δ 8.13 (d, *J* = 8.4 Hz, 1H), 8.02 (s, 1H), 7.93 (d, *J* = 9.6 Hz, 1H), 7.78 (d, *J* = 8.4 Hz, 1H), 7.62-7.58 (m, 1H), 7.57-7.50 (m, 3H), 7.50-7.45 (m, 2H), 7.40-7.34 (m, 2H), 7.15 (d, *J* = 8.4 Hz, 1H), 5.08-7.05 (m, 1H), 3.23 (dd, *J* = 7.6 Hz, *J* = 16.0 Hz, 1H), 3.00 (dd, *J* = 5.2 Hz, *J* = 16.4 Hz, 1H), 1.92 (s, 3H); **<sup>13</sup>C NMR** (100 MHz, CDCl<sub>3</sub>) δ 169.8, 147.2, 138.3, 137.5, 137.2, 134.4, 130.9, 123.0, 129.5, 128.2, 127.9, 126.6, 125.9, 125.7, 124.7, 123.0, 122.7, 102.2, 39.8, 31.0, 12.5.;

**HRMS** (ESI) Calcd for C<sub>23</sub>H<sub>19</sub>N<sub>3</sub>NaO<sup>+</sup> [M+Na]<sup>+</sup>: 376.1420, found: 376.1417.;

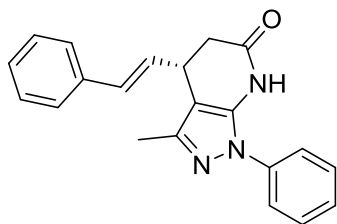

3o

**(S,E)-3-methyl-1-phenyl-4-styryl-1,4,5,7-tetrahydro-6H-pyrazolo[3,4-b]pyridin-6-one:** 90% yield, 98% ee;  $[\alpha]_D^{25} = -45.8$  (c=1.0 in  $\text{CHCl}_3$ ).

**HPLC condition:** Chiralpak AZH (Hex/iPrOH = 95/5, 1.0 mL/min,  $t_R$  (major) = 27.9 min,  $t_R$  (minor) = 36.1 min).

**$^1\text{H}$  NMR** (400 MHz,  $\text{CDCl}_3$ )  $\delta$  7.87 (s, 1H), 7.51-7.45 (m, 4H), 7.39-7.34 (m, 3H), 7.33-7.28 (m, 2H), 7.25-7.21 (m, 1H), 6.43 (d,  $J = 14.4$  Hz, 1H), 6.2 (dd,  $J = 6.4$  Hz,  $J = 16.0$  Hz, 1H), 3.82 (q,  $J = 7.2$  Hz, 1H), 2.93 (dd,  $J = 7.2$  Hz,  $J = 16.0$  Hz, 1H), 2.75 (dd,  $J = 5.2$  Hz,  $J = 16.4$  Hz, 1H), 2.25 (s, 3H);  **$^{13}\text{C}$  NMR** (100 MHz,  $\text{CDCl}_3$ )  $\delta$  167.0, 147.0, 137.5, 137.1, 136.6, 130.6, 123.0, 129.8, 128.7, 127.9, 127.8, 126.5, 123.0, 101.8, 38.3, 33.0, 12.6.; **HRMS** (ESI) Calcd for  $\text{C}_{21}\text{H}_{20}\text{N}_3\text{O}^+$   $[\text{M}+\text{H}]^+$ : 330.1601, found: 330.1600.;

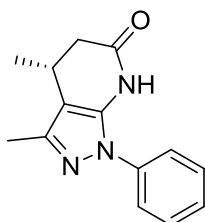

3p

**(R)-3,4-dimethyl-1-phenyl-1,4,5,7-tetrahydro-6H-pyrazolo[3,4-b]pyridin-6-one :** 65% yield, 98% ee;  $[\alpha]_D^{25} = -11.6$ (c=1.0 in  $\text{CHCl}_3$ ).

**HPLC condition:** Chiralpak IC (Hex/iPrOH = 90/10, 1.0 mL/min,  $t_R$  (major) = 17.4 min,  $t_R$  (minor) = 20.1 min).

**$^1\text{H}$  NMR** (400 MHz,  $\text{CDCl}_3$ )  $\delta$  7.73 (s, 1H), 7.47 (t,  $J = 8.4$  Hz, 2H), 7.44-7.41 (m, 2H), 7.37-7.33 (m, 1H), 3.11 (t,  $J = 6.8$  Hz, 1H), 2.81 (dd,  $J = 6.8$  Hz,  $J = 16.0$  Hz, 1H), 2.48 (dd,  $J = 5.2$  Hz,  $J = 16.0$  Hz, 1H), 2.28 (s, 3H), 1.25 (s, 3H);  **$^{13}\text{C}$  NMR** (100 MHz,  $\text{CDCl}_3$ )  $\delta$  170.6, 146.2, 137.5, 136.6, 129.9, 127.8, 122.9, 105.1, 40.0, 24.4, 20.8, 12.7. **HRMS** (ESI) Calcd for  $\text{C}_{14}\text{H}_{16}\text{N}_3\text{O}^+$   $[\text{M}+\text{H}]^+$ : 242.1288, found: 242.1295.;

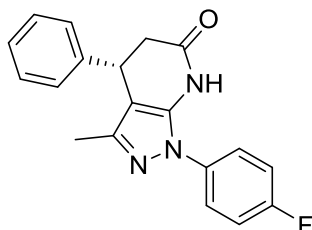

3q

**(S)-1-(4-fluorophenyl)-3-methyl-4-phenyl-1,4,5,7-tetrahydro-6H-pyrazolo[3,4-b]pyridin-6-one:** 95% yield, 99% ee;  $[\alpha]_D^{25} = -100.8$  (c=1.0 in  $\text{CHCl}_3$ ).

**HPLC condition:** Chiralpak AZH (Hex/iPrOH = 95/5, 1.0 mL/min,  $t_R$  (major) = 23.9 min,  $t_R$  (minor) = 33.1 min).

**$^1\text{H}$  NMR** (400 MHz,  $\text{CDCl}_3$ )  $\delta$  7.8 (s, 1H), 7.47-7.43 (m, 2H), 7.34 (t,  $J = 6.8$  Hz, 2H), 7.29-7.25 (m, 1H), 7.29-7.25 (m, 4H), 4.23 (t,  $J = 7.2$  Hz, 1H), 3.06 (dd,  $J = 7.2$  Hz,  $J = 16.0$  Hz, 1H), 2.86 (dd,  $J = 6.4$  Hz,  $J = 16.0$  Hz, 1H), 1.94 (s, 3H);  **$^{13}\text{C}$  NMR** (100 MHz,  $\text{CDCl}_3$ )  $\delta$  170.0, 147.1, 142.2, 137.6, 133.5, 129.1, 127.4, 127.2, 125.2 (d,  $J = 23.0$  Hz), 116.9 (d,  $J = 8.6$  Hz), 102.8, 40.7, 35.5, 12.6.  **$^{19}\text{F}$  NMR** (376 MHz,  $\text{CDCl}_3$ )  $\delta$  -112.8.; **HRMS** (ESI) Calcd for  $\text{C}_{19}\text{H}_{17}\text{FN}_3\text{O}^+ [\text{M}+\text{H}]^+$ : 322.1350, found: 322.1353.;

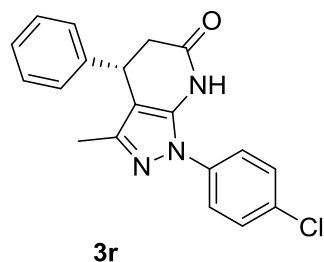

**(S)-1-(4-chlorophenyl)-3-methyl-4-phenyl-1,4,5,7-tetrahydro-6H-pyrazolo[3,4-b]pyridin-6-one:** 94% yield, 99% ee;  $[\alpha]_D^{25} = -65.6$  (c=1.0 in  $\text{CHCl}_3$ ).

**HPLC condition:** Chiralpak IA (Hex/iPrOH = 98/2, 0.8 mL/min,  $t_R$  (major) = 72.4 min,  $t_R$  (minor) = 80.1 min).

**$^1\text{H}$  NMR** (400 MHz,  $\text{CDCl}_3$ )  $\delta$  8.67 (s, 1H), 7.43-7.39 (m, 4H), 7.34 (t,  $J = 6.8$  Hz, 2H), 7.29-7.26 (m, 1H), 7.21 (d,  $J = 6.8$  Hz, 2H), 4.21 (t,  $J = 6.8$  Hz, 1H), 3.02 (dd,  $J = 8.4$  Hz,  $J = 17.2$  Hz, 1H), 2.81 (dd,  $J = 10.0$  Hz,  $J = 16.4$  Hz, 1H), 1.93 (s, 3H);  **$^{13}\text{C}$  NMR** (100 MHz,  $\text{CDCl}_3$ )  $\delta$  170.5, 147.3, 142.1, 137.7, 136.1, 133.3, 129.9, 129.1, 127.4, 127.2, 124.2, 103.2, 40.7, 35.4, 12.6. **HRMS** (ESI) Calcd for  $\text{C}_{19}\text{H}_{17}\text{ClN}_3\text{O}^+ [\text{M}+\text{H}]^+$ : 338.1055, found: 338.1064.;

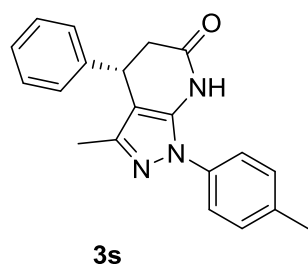

**(S)-3-methyl-4-phenyl-1-(p-tolyl)-1,4,5,7-tetrahydro-6H-pyrazolo[3,4-b]pyridin-6-one:** 96% yield, 99% ee;  $[\alpha]_D^{25} = -99.0$  (c=1.0 in  $\text{CHCl}_3$ ).

**HPLC condition:** Chiralpak IC (Hex/iPrOH = 80/20, 1.0 mL/min,  $t_R$  (major) = 13.4 min,  $t_R$  (minor) = 17.4 min).

**$^1\text{H}$  NMR** (400 MHz,  $\text{CDCl}_3$ )  $\delta$  8.05 (s, 1H), 7.35-7.31 (m, 4H), 7.28-7.21 (m, 5H), 4.21 (t,  $J = 6.8$  Hz, 1H), 3.03 (dd,  $J = 7.6$  Hz,  $J = 16.4$  Hz, 1H), 2.83 (dd,  $J = 6.4$  Hz,  $J = 16.0$  Hz, 1H), 2.38 (s, 3H), 1.93 (s, 3H);  **$^{13}\text{C}$  NMR** (100 MHz,  $\text{CDCl}_3$ )  $\delta$  170.0, 146.6, 142.4, 137.9, 137.5, 135.0, 130.4, 129.0, 127.3, 127.3, 123.0, 102.6, 40.7, 35.6, 21.2, 12.6. **HRMS** (ESI) Calcd for  $\text{C}_{20}\text{H}_{20}\text{N}_3\text{O}^+ [\text{M}+\text{H}]^+$ : 318.1601, found: 318.1606.;



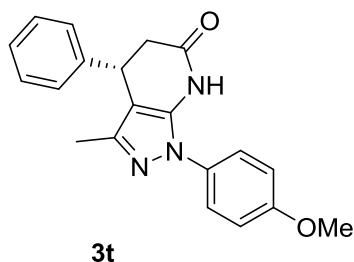

**(S)-1-(4-methoxyphenyl)-3-methyl-4-phenyl-1,4,5,7-tetrahydro-6H-pyrazolo[3,4-b]pyridin-6-one:** 97% yield, 99% ee;  $[\alpha]_D^{25} = -104.6$  (c=1.0 in  $\text{CHCl}_3$ ).

**HPLC condition:** Chiralpak IC (Hex/iPrOH = 80/20, 1.0 mL/min,  $t_R$  (major) = 24.4 min,  $t_R$  (minor) = 28.8 min).

**$^1\text{H}$  NMR** (400 MHz,  $\text{CDCl}_3$ )  $\delta$  8.05 (s, 1H), 7.34 (d,  $J = 7.6$  Hz, 4H), 7.27-7.20 (m, 3H), 6.96 (d,  $J = 8.8$  Hz, 2H), 4.21 (t,  $J = 6.8$  Hz, 1H), 3.83 (s, 3H), 3.02 (dd,  $J = 9.2$  Hz,  $J = 16.4$  Hz, 1H), 2.82 (dd,  $J = 6.4$  Hz,  $J = 16.0$  Hz, 1H), 1.93 (s, 3H);  **$^{13}\text{C}$  NMR** (100 MHz,  $\text{CDCl}_3$ )  $\delta$  170.1, 159.3, 146.4, 142.5, 137.6, 130.4, 129.0, 127.3, 127.3, 125.0, 115.0, 102.3, 55.7, 40.8, 35.6, 12.6. **HRMS** (ESI) Calcd for  $\text{C}_{20}\text{H}_{20}\text{N}_3\text{O}_2^+$   $[\text{M}+\text{H}]^+$ : 334.1550, found: 334.1550.;

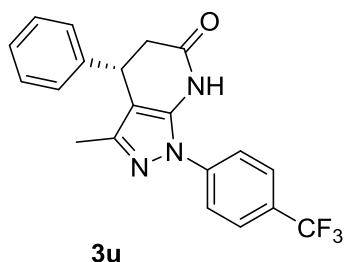

**(S)-3-methyl-4-phenyl-1-(4-(trifluoromethyl)phenyl)-1,4,5,7-tetrahydro-6H-pyrazolo[3,4-b]pyridin-6-one:** 92% yield, 99% ee;  $[\alpha]_D^{25} = -282.2$  (c=1.0 in  $\text{CHCl}_3$ ).

**HPLC condition:** Chiralpak IB (Hex/iPrOH = 95/5, 1.0 mL/min,  $t_R$  (major) = 14.4 min,  $t_R$  (minor) = 18.7 min).

**$^1\text{H}$  NMR** (400 MHz,  $\text{CDCl}_3$ )  $\delta$  9.09 (s, 1H), 7.64 (d,  $J = 8.8$  Hz, 2H), 7.34 (t,  $J = 7.2$  Hz, 2H), 7.30-7.26 (m, 1H), 7.22-7.20 (m, 2H), 4.21 (t,  $J = 6.8$  Hz, 1H), 3.02 (dd,  $J = 7.2$  Hz,  $J = 16.0$  Hz, 1H), 2.81 (dd,  $J = 6.4$  Hz,  $J = 16.0$  Hz, 1H), 1.94 (s, 3H);  **$^{13}\text{C}$  NMR** (100 MHz,  $\text{CDCl}_3$ )  $\delta$  170.8, 148.0, 142.0, 140.5, 137.9, 129.1, 127.5, 127.2, 127.0 (q,  $J = 3.9$  Hz), 122.6, 103.9, 40.6, 35.3, 12.6.  **$^{19}\text{F}$  NMR** (376 MHz,  $\text{CDCl}_3$ )  $\delta$  -62.23.; **HRMS** (ESI) Calcd for  $\text{C}_{20}\text{H}_{17}\text{F}_3\text{N}_3\text{O}^+$   $[\text{M}+\text{H}]^+$ : 372.1318, found: 372.1316.;

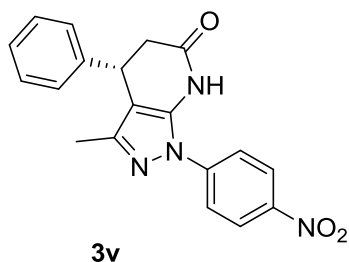

**(S)-3-methyl-1-(4-nitrophenyl)-4-phenyl-1,4,5,7-tetrahydro-6H-pyrazolo[3,4-b]pyridin-6-one:** 92% yield, 95% ee;  $[\alpha]_D^{25} = -68.0$  (c=1.0 in  $\text{CHCl}_3$ ).

**HPLC condition:** Chiralpak AZH (Hex/iPrOH = 90/10, 1.0 mL/min,  $t_R$  (major) = 10.0 min,  $t_R$  (minor) = 15.3 min).

**$^1\text{H}$  NMR** (400 MHz,  $\text{CDCl}_3$ )  $\delta$  8.54 (s, 1H), 7.45-7.41 (m, 2H), 7.33 (t,  $J = 14.4$  Hz, 2H), 7.28-7.24 (m, 1H), 7.22-7.20 (m, 2H), 7.15-7.09 (m, 2H), 4.20 (t,  $J = 6.8$  Hz, 1H), 3.01 (dd,  $J = 8.8$  Hz,  $J = 18.0$  Hz, 1H), 2.81 (dd,  $J = 4.4$  Hz,  $J = 14.4$  Hz, 1H), 1.93 (s, 3H);  **$^{13}\text{C}$  NMR** (100 MHz,  $\text{CDCl}_3$ )  $\delta$  170.6, 163.1, 160.6, 147.0, 142.3, 137.8, 133.6, 129.1, 127.4, 127.2, 125.3, 125.2, 116.8, 116.6, 102.8, 40.7, 35.5, 12.5.; **HRMS** (ESI) Calcd for  $\text{C}_{19}\text{H}_{16}\text{N}_4\text{NaO}_3^+$  [ $\text{M}+\text{Na}$ ] $^+$ : 371.1115, found: 371.1112.;

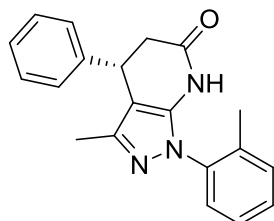

**3w**

**(S)-3-methyl-4-phenyl-1-(o-tolyl)-1,4,5,7-tetrahydro-6H-pyrazolo[3,4-b]pyridin-6-one:** 98% yield, 99% ee;  $[\alpha]_D^{25} = -64.0$  (c=1.0 in  $\text{CHCl}_3$ ).

**HPLC condition:** Chiralpak IA (Hex/iPrOH = 95/5, 1.0 mL/min,  $t_R$  (major) = 17.5 min,  $t_R$  (minor) = 21.9 min).

**$^1\text{H}$  NMR** (400 MHz,  $\text{CDCl}_3$ )  $\delta$  7.78 (s, 1H), 7.36-7.31 (m, 4H), 7.30-7.25 (m, 3H), 7.23-7.19 (m, 2H), 4.23 (t,  $J = 6.4$  Hz, 1H), 3.01 (dd,  $J = 7.6$  Hz,  $J = 16.4$  Hz, 1H), 2.78 (dd,  $J = 6.4$  Hz,  $J = 16.4$  Hz, 1H), 2.17 (s, 3H), 1.94 (s, 3H);  **$^{13}\text{C}$  NMR** (100 MHz,  $\text{CDCl}_3$ )  $\delta$  169.9, 146.4, 142.7, 138.7, 136.2, 135.6, 131.6, 129.8, 129.0, 127.6, 127.3, 127.2, 127.1, 100.9, 40.9, 35.6, 17.6, 12.6.; **HRMS** (ESI) Calcd for  $\text{C}_{20}\text{H}_{20}\text{N}_3\text{O}^+$  [ $\text{M}+\text{H}$ ] $^+$ : 318.1601, found: 318.1606.;

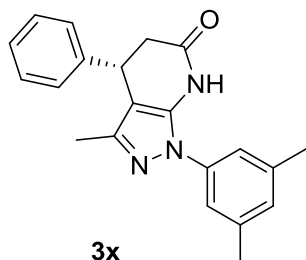

**3x**

**(S)-1-(3,5-dimethylphenyl)-3-methyl-4-phenyl-1,4,5,7-tetrahydro-6H-pyrazolo[3,4-b]pyridin-6-one:** 95% yield, 99% ee;  $[\alpha]_D^{25} = -105.0$  (c=1.0 in  $\text{CHCl}_3$ ).

**HPLC condition:** Chiralpak ID (Hex/iPrOH = 96/4, 0.8 mL/min,  $t_R$  (major) = 43.2 min,  $t_R$  (minor) = 53.8 min).

**$^1\text{H}$  NMR** (400 MHz,  $\text{CDCl}_3$ )  $\delta$  8.41 (s, 1H), 7.33 (t,  $J = 6.8$  Hz, 2H), 7.27-7.25 (m, 1H), 7.24-7.20 (m, 2H), 7.09 (s, 2H), 6.98 (s, 1H), 4.2 (t,  $J = 6.8$  Hz, 1H), 3.03 (dd,  $J = 7.2$  Hz,  $J = 16.0$  Hz, 1H), 2.83 (dd,  $J = 6.4$  Hz,  $J = 9.6$  Hz, 1H), 2.34 (s, 6H), 1.94 (s, 3H);  **$^{13}\text{C}$  NMR** (100 MHz,  $\text{CDCl}_3$ )  $\delta$  170.2, 146.6, 142.4, 139.8, 137.5, 137.3, 129.5, 129.0, 127.3, 127.3, 120.7, 102.6, 40.8, 35.5, 21.4, 12.6.; **HRMS** (ESI) Calcd for  $\text{C}_{21}\text{H}_{22}\text{N}_3\text{O}^+$  [ $\text{M}+\text{H}$ ] $^+$ : 332.1757, found: 332.1760.;

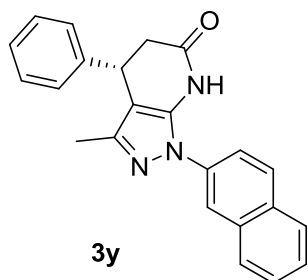

**(S)-3-methyl-1-(naphthalen-2-yl)-4-phenyl-1,4,5,7-tetrahydro-6H-pyrazolo[3,4-b]pyridin-6-one:** 95% yield, 99% ee;  $[\alpha]_D^{25} = -128.2$  (c=1.0 in  $\text{CHCl}_3$ ).

**HPLC condition:** Chiralpak IB (Hex/iPrOH = 95/5, 1.0 mL/min,  $t_R$  (major) = 32.1 min,  $t_R$  (minor) = 40.4 min).

**$^1\text{H NMR}$**  (400 MHz,  $\text{CDCl}_3$ )  $\delta$  8.57 (s, 1H), 7.93 (d,  $J = 8.8$  Hz, 1H), 7.88-7.82 (m, 3H), 7.67-7.64 (m, 1H), 7.55-7.50 (m, 2H), 7.37-7.33 (m, 2H), 7.29-7.27 (m, 1H), 7.24-7.22 (m, 2H), 4.19 (t,  $J = 6.8$  Hz, 1H), 3.00 (dd,  $J = 7.2$  Hz,  $J = 16.4$  Hz, 1H), 2.81 (dd,  $J = 6.4$  Hz,  $J = 16.0$  Hz, 1H), 1.97 (s, 3H);  **$^{13}\text{C NMR}$**  (100 MHz,  $\text{CDCl}_3$ )  $\delta$  170.3, 147.2, 142.3, 137.8, 135.0, 133.4, 132.3, 130.1, 129.1, 128.2, 128.0, 127.4, 127.3, 127.2, 126.7, 121.6, 120.4, 103.0, 40.6, 35.5, 12.6.; **HRMS** (ESI) Calcd for  $\text{C}_{23}\text{H}_{20}\text{N}_3\text{O}^+ [\text{M}+\text{H}]^+$ : 354.1601, found: 354.1605.;

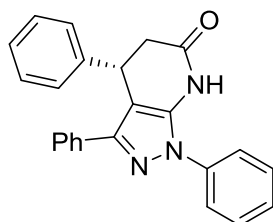

**(S)-1,3,4-triphenyl-1,4,5,7-tetrahydro-6H-pyrazolo[3,4-b]pyridin-6-one:** 90% yield, 99% ee;  $[\alpha]_D^{25} = -19.8$  (c=1.0 in  $\text{CHCl}_3$ ).

**HPLC condition:** Chiralpak IB (Hex/iPrOH = 90/10, 1.0 mL/min,  $t_R$  (major) = 13.8 min,  $t_R$  (minor) = 21.0 min).

**$^1\text{H NMR}$**  (400 MHz,  $\text{CDCl}_3$ )  $\delta$  8.18 (s, 1H), 7.60-7.49 (m, 6H), 7.42 (t,  $J = 7.6$  Hz, 1H), 7.33-7.28 (m, 5H), 7.26-7.19 (m, 3H), 4.51 (d,  $J = 5.6$  Hz, 1H), 3.18 (dd,  $J = 8.0$  Hz,  $J = 16.0$  Hz, 1H), 2.86 (dd,  $J = 2.4$  Hz,  $J = 16$  Hz, 1H);  **$^{13}\text{C NMR}$**  (100 MHz,  $\text{CDCl}_3$ )  $\delta$  169.7, 148.9, 142.2, 138.7, 137.5, 132.7, 130.0, 129.2, 128.7, 128.3, 128.3, 127.4, 127.1, 127.1, 123.5, 101.9, 41.1, 35.5.; **HRMS** (ESI) Calcd for  $\text{C}_{24}\text{H}_{20}\text{N}_3\text{O}^+ [\text{M}+\text{H}]^+$ : 366.1601, found: 366.1611.;

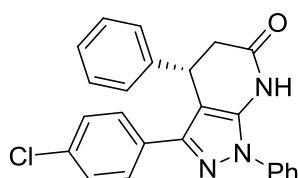

**(S)-3-(4-chlorophenyl)-1,4-diphenyl-1,4,5,7-tetrahydro-6H-pyrazolo[3,4-b]pyridin-6-one:** 98% yield, 99% ee;  $[\alpha]_D^{25} = +10.4$  (c=1.0 in  $\text{CHCl}_3$ ).

**HPLC condition:** Chiralpak IB (Hex/iPrOH = 95/5, 1.0 mL/min,  $t_R$  (major) = 26.2 min,  $t_R$  (minor) = 29.2 min).

**$^1\text{H}$  NMR** (400 MHz,  $\text{CDCl}_3$ )  $\delta$  8.57 (s, 1H), 7.58-7.55 (m, 2H), 7.51-7.46 (m, 4H), 7.43-7.38 (m, 1H), 7.22-7.33 (m, 5H), 7.19-7.17 (m, 2H), 4.45 (d,  $J = 5.2$  Hz, 1H), 3.16 (dd,  $J = 7.6$  Hz,  $J = 15.6$  Hz, 1H), 2.83 (d,  $J = 13.6$  Hz, 1H);  **$^{13}\text{C}$  NMR** (100 MHz,  $\text{CDCl}_3$ )  $\delta$  169.8, 147.7, 142.0, 139.0, 137.4, 134.1, 131.2, 123.0, 129.3, 128.8, 128.4, 128.4, 127.6, 127.0, 123.6, 101.9, 41.1, 35.5.; **HRMS** (ESI) Calcd for  $\text{C}_{24}\text{H}_{19}\text{ClN}_3\text{O}^+$   $[\text{M}+\text{H}]^+$ : 400.1211, found: 400.1211.;

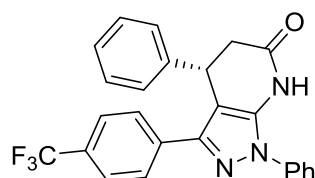

**3ab**

**(S)-1,4-diphenyl-3-(4-(trifluoromethyl)phenyl)-1,4,5,7-tetrahydro-6H-pyrazolo[3,4-b]pyridin-6-one:** 97% yield, 99% ee;  $[\alpha]_D^{25} = -32.2$  (c=1.0 in  $\text{CHCl}_3$ ).

**HPLC condition:** Chiralpak IA (Hex/iPrOH = 90/10, 1.0 mL/min,  $t_R$  (major) = 10.9 min,  $t_R$  (minor) = 15.8 min).

**$^1\text{H}$  NMR** (400 MHz,  $\text{CDCl}_3$ )  $\delta$  8.49 (s, 1H), 7.67 (d,  $J = 8.4$  Hz, 2H), 7.60-7.50 (m, 6H), 7.44 (t,  $J = 7.2$  Hz, 1H), 7.33-7.29 (m, 2H), 7.27-7.23 (m, 1H), 7.19 (d,  $J = 8.0$  Hz, 2H), 4.51-4.48 (m, 1H), 3.18 (dd,  $J = 8.0$  Hz,  $J = 16.4$  Hz, 1H), 2.88-2.83 (m, 1H);  **$^{13}\text{C}$  NMR** (100 MHz,  $\text{CDCl}_3$ )  $\delta$  169.7, 147.4, 141.9, 139.2, 137.3, 136.2, 130.0, 129.8, 129.4, 128.6, 127.6, 127.2, 127.0, 125.6 (q,  $J = 3.7$  Hz), 123.6, 122.9, 102.2, 77.4, 41.1, 35.5.  **$^{19}\text{F}$  NMR** (376 MHz,  $\text{CDCl}_3$ )  $\delta$  -62.47; **HRMS** (ESI) Calcd for  $\text{C}_{25}\text{H}_{19}\text{F}_3\text{N}_3\text{O}^+$   $[\text{M}+\text{H}]^+$ : 434.1475, found: 434.1480.;

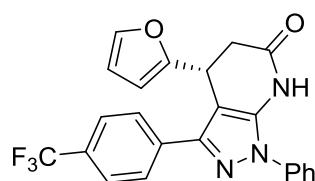

**3ac**

**(R)-4-(furan-2-yl)-1-phenyl-3-(4-(trifluoromethyl)phenyl)-1,4,5,7-tetrahydro-6H-pyrazolo[3,4-b]pyridin-6-one:** 67% yield, 96% ee;  $[\alpha]_D^{25} = +35.00$  (c=1.0 in  $\text{CHCl}_3$ ).

**HPLC condition:** Chiralpak IA (Hex/iPrOH = 90/10, 1.0 mL/min,  $t_R$  (major) = 10.6 min,  $t_R$  (minor) = 15.2 min).

**$^1\text{H}$  NMR** (400 MHz,  $\text{CDCl}_3$ )  $\delta$  8.06 (s, 1H), 7.87 (d,  $J = 4.0$  Hz, 2H), 7.64 (d,  $J = 8.4$  Hz, 2H), 7.57-7.51 (m, 4H), 7.46-7.42 (m, 1H), 7.35 (s, 1H), 6.27-6.25 (m, 1H), 6.04-6.03 (m, 1H), 4.56-4.54 (m, 1H), 3.08-3.06 (m, 2H);  **$^{13}\text{C}$  NMR** (100 MHz,  $\text{CDCl}_3$ )  $\delta$  169.3, 154.2, 147.2, 142.7, 138.9, 137.2, 136.2, 130.1, 128.7, 127.2, 125.8 (d,  $J = 4.0$  Hz), 123.5, 110.5, 106.7, 100.4, 37.5, 29.7.  **$^{19}\text{F}$  NMR** (376 MHz,  $\text{CDCl}_3$ )

$\delta$  -60.77; **HRMS** (ESI) Calcd for  $C_{23}H_{17}F_3N_3O_2^+$   $[M+H]^+$ : 424.1267, found: 424.1272.;

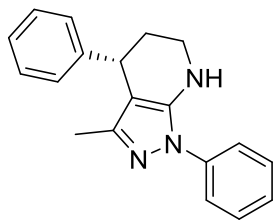

**(S)-3-methyl-1,4-diphenyl-4,5,6,7-tetrahydro-1H-pyrazolo[3,4-b]pyridine:** 87% yield, 97% ee;  $[\alpha]_D^{25} = -10.4$  ( $c=1.0$  in  $CHCl_3$ ).

**HPLC condition:** Chiralpak ASH (Hex/*i*PrOH = 95/5, 1.0 mL/min,  $t_R$  (major) = 13.3 min,  $t_R$  (minor) = 25.9 min).

**$^1H$  NMR** (400 MHz,  $CDCl_3$ )  $\delta$  7.65-7.62 (m, 2H), 7.45 (t,  $J = 7.6$  Hz, 2H), 7.33-7.19 (m, 6H), 4.04 (t,  $J = 5.6$  Hz, 1H), 3.92 (s, 1H), 3.26-3.13 (m, 2H), 2.26-2.18 (m, 1H), 1.97-1.90 (m, 1H), 1.86 (s, 3H);  **$^{13}C$  NMR** (100 MHz,  $CDCl_3$ )  $\delta$  148.1, 145.5, 144.8, 139.3, 129.5, 128.4, 128.1, 126.4, 126.1, 122.0, 101.1, 40.4, 36.6, 33.1, 12.7.; **HRMS** (ESI) Calcd for  $C_{19}H_{20}N_3^+$   $[M+H]^+$ : 290.1652, found: 290.1655.;

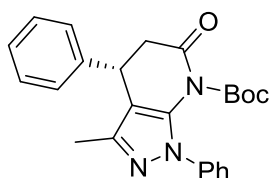

5

**tert-butyl(S)-3-methyl-6-oxo-1,4-diphenyl-1,4,5,6-tetrahydro-7H-pyrazolo[3,4-b]pyridine-7-carboxylate:** 80% yield, 97% ee;  $[\alpha]_D^{25} = -156.4$  ( $c=1.0$  in  $CHCl_3$ ).

**HPLC condition:** Chiralpak IA (Hex/*i*PrOH = 95/5, 1.0 mL/min,  $t_R$  (major) = 12.1 min,  $t_R$  (minor) = 16.2 min).

**$^1H$  NMR** (400 MHz,  $CDCl_3$ )  $\delta$  7.54-7.50 (m, 2H), 7.45 (t,  $J = 7.6$  Hz, 2H), 7.34-7.29 (m, 3H), 7.25-7.19 (m, 3H), 4.21 (t,  $J = 5.2$  Hz, 1H), 3.14 (dd,  $J = 6.0$  Hz,  $J = 15.2$  Hz, 1H), 3.00 (dd,  $J = 4.9$  Hz,  $J = 14.8$  Hz, 1H), 2.06 (s, 3H), 1.09 (s, 9H);  **$^{13}C$  NMR** (100 MHz,  $CDCl_3$ )  $\delta$  169.1, 147.8, 145.8, 140.4, 139.4, 137.0, 129.7, 129.0, 127.5, 127.3, 122.6, 108.9, 85.3, 43.9, 34.8, 27.2, 12.3.; **HRMS** (ESI) Calcd for  $C_{24}H_{26}N_3O_3^+$   $[M+H]^+$ : 404.1969, found: 404.1972.;

## b) References

- (1) L. D. Hawkins, Preparation of Trisubstituted Benzene Compounds for Treating Congestive Heart Failure, US 4971959 [A] 1990.
- (2) D. H. Liu, Z. L. Hu, Y. X. Zhang, Z. Q. Fu and Huang, W, Access to Enantioenriched Spiro- $\epsilon$ -Lactam Oxindoles by an N-Heterocyclic Carbene-Catalyzed [4+3] Annulation of Flexible Oxotryptamines with Enals, Chem. Eur. J., 2019, 25, 11223.
- (3) J. Sabbatani and N. Maulide, Temporary Generation of a Cyclopropyl Oxocarbenium Ion Enables Highly Diastereoselective Donor-Acceptor Cyclopropane Cycloaddition, Angew. Chem.

Int. Ed., 2016, 55, 6780.

(4) C. Guo, M. Saifuddin, T. Saravanan, M. Sharifi and G. J. Poelarends, Biocatalytic Asymmetric Michael Additions of Nitromethane to  $\alpha$ ,  $\beta$ -Unsaturated Aldehydes via Enzyme-bound Iminium Ion Intermediates, ACS Catal., 2019, 9, 4369.

(5) A. Bouisseau, M. Gao and M. C. Willis, Traceless Rhodium-Catalyzed Hydroacylation using Alkyl Aldehydes: the Enantioselective Synthesis of  $\beta$ -aryl Ketones, Chem. Eur. J., 2016, 22, 15624

#### IV: $^1\text{H}$ , $^{13}\text{C}$ , $^{19}\text{F}$ NMR and HPLC data of products

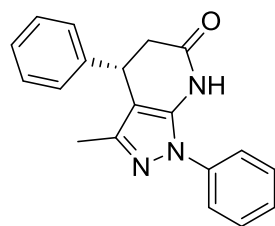

**3a**

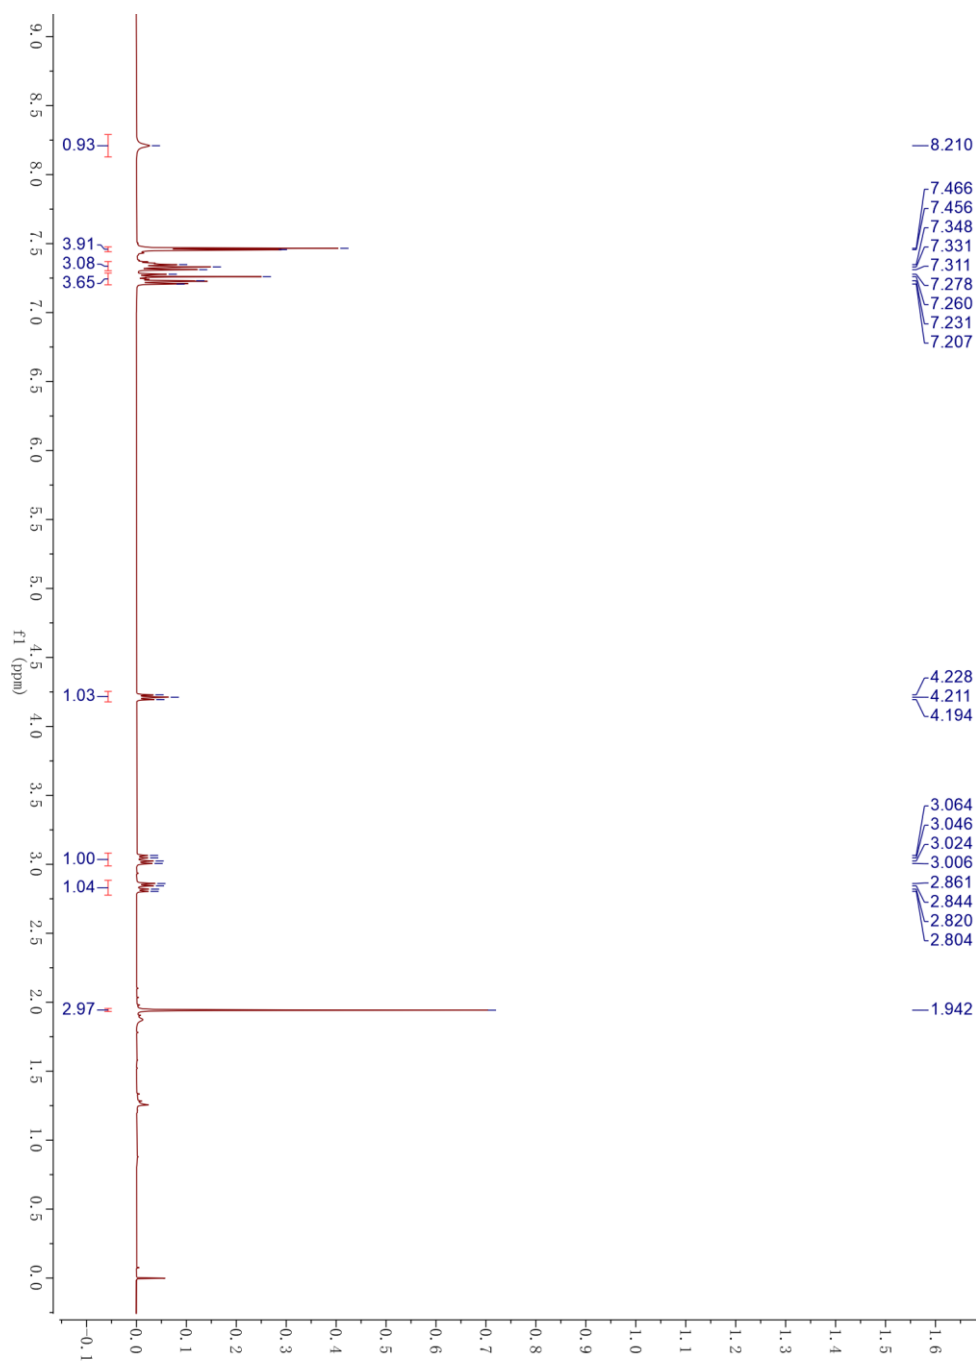

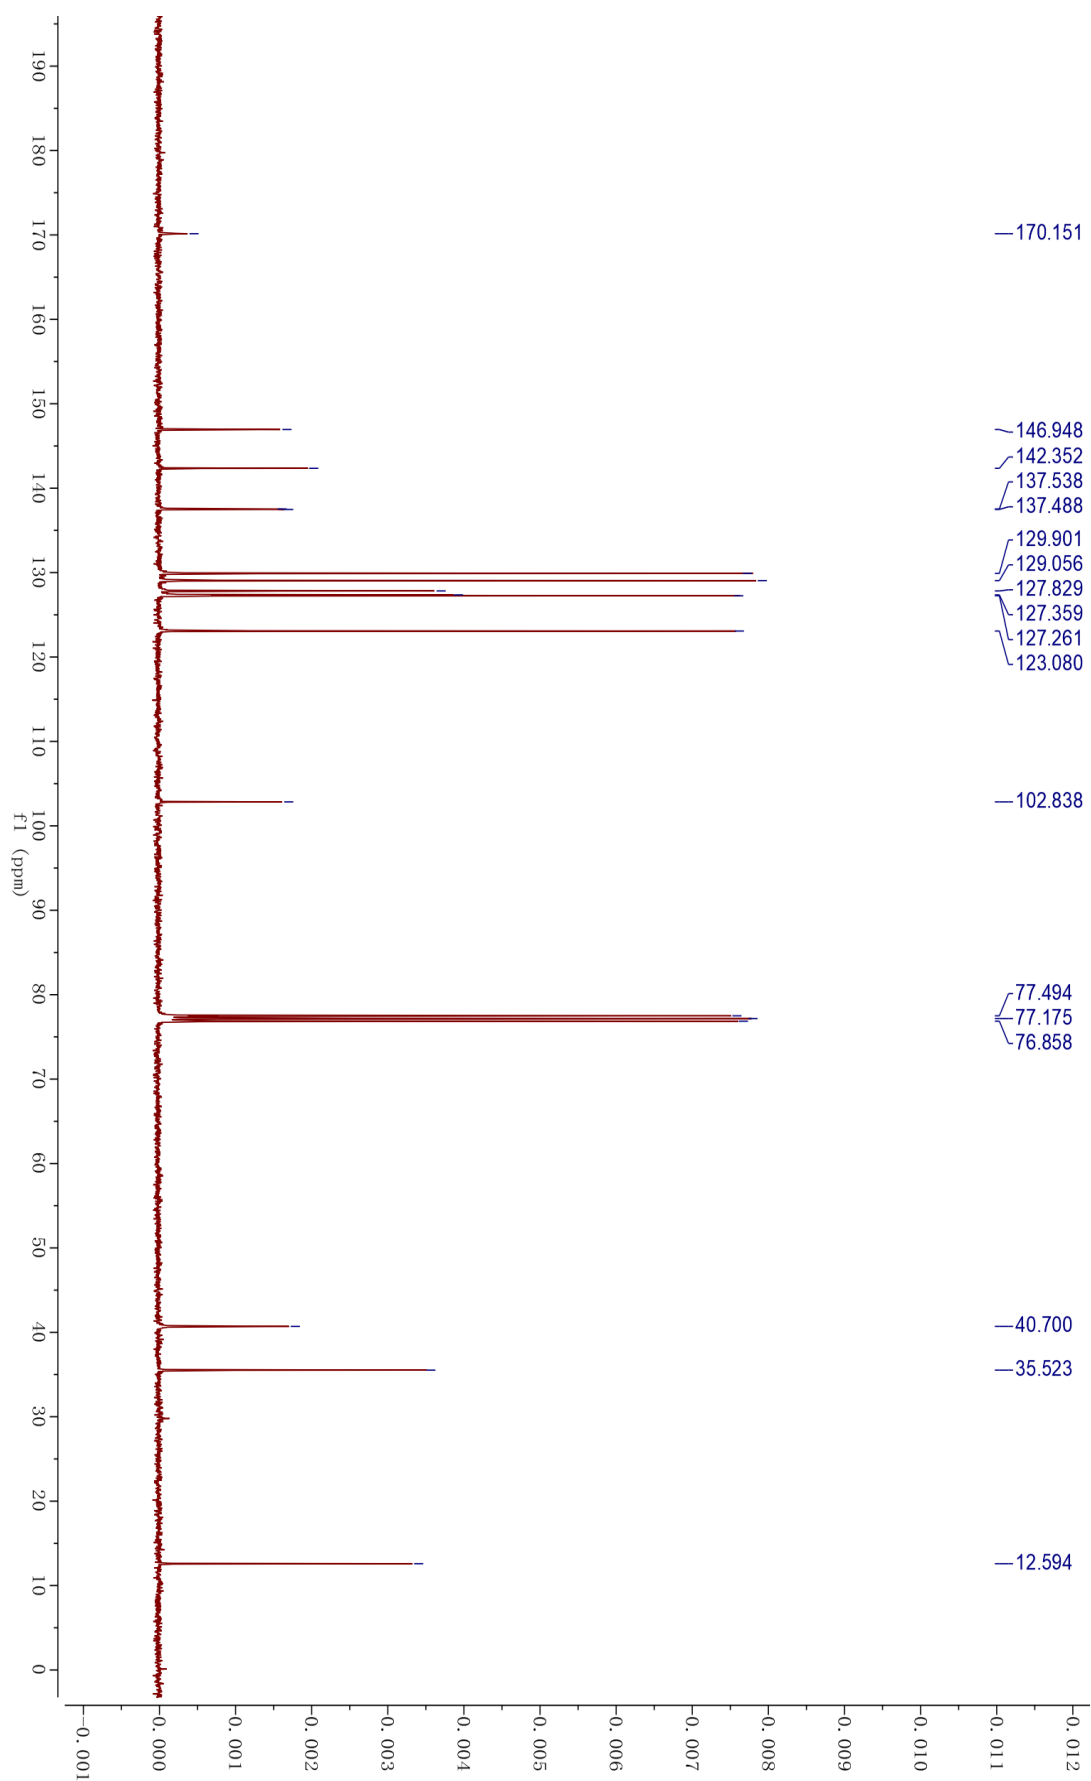



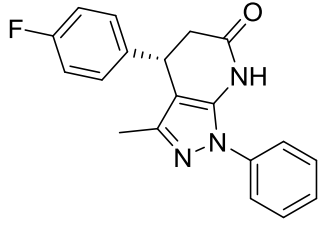

**3b**

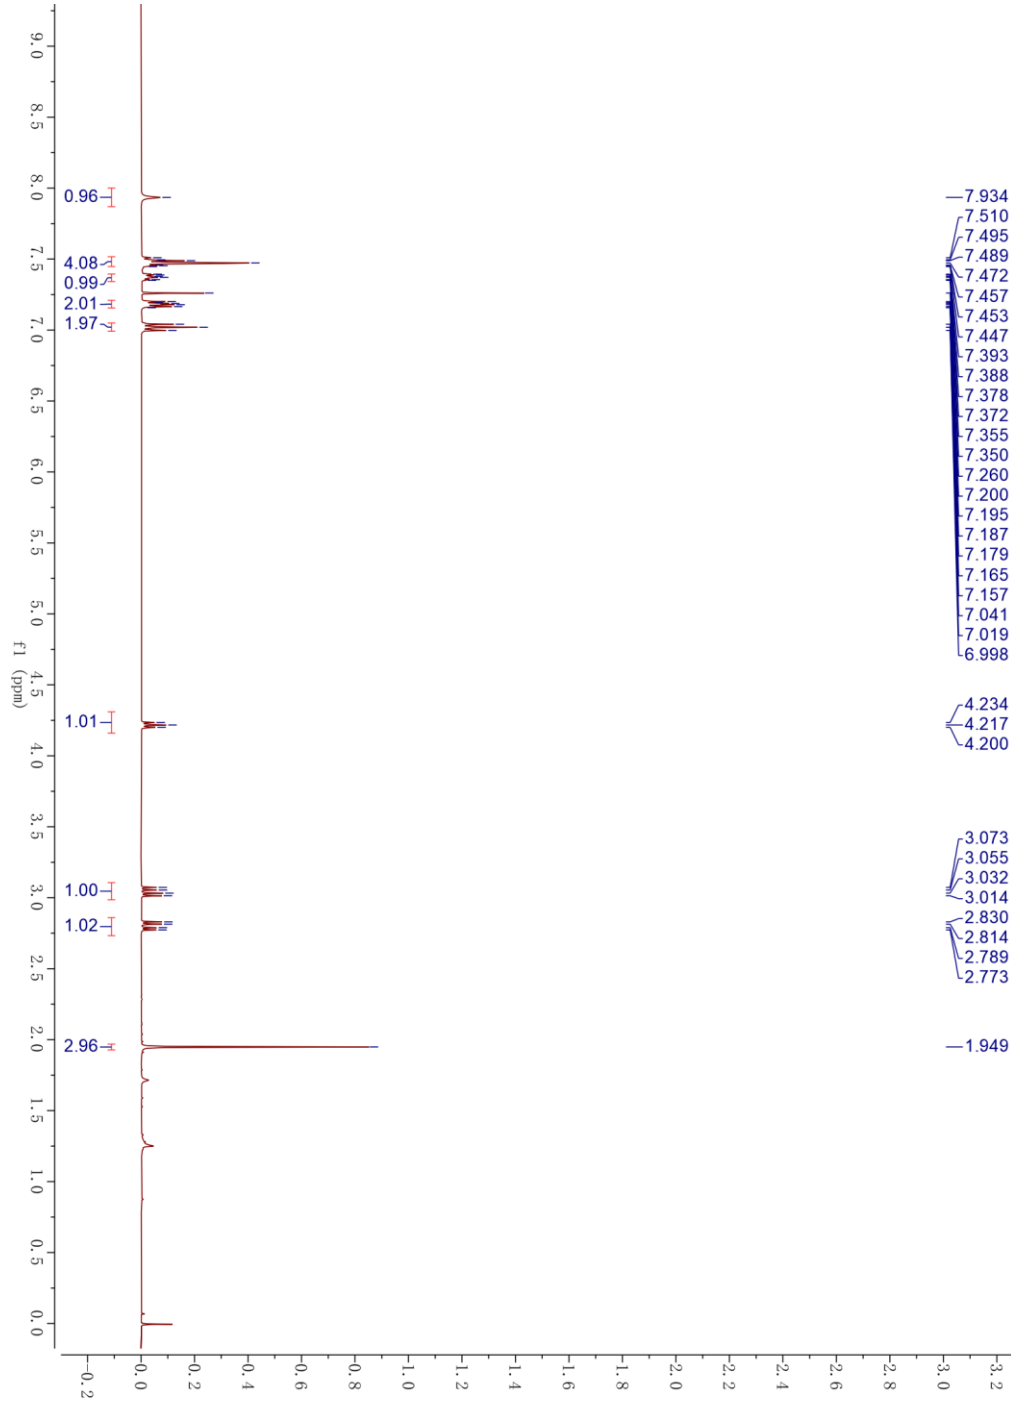

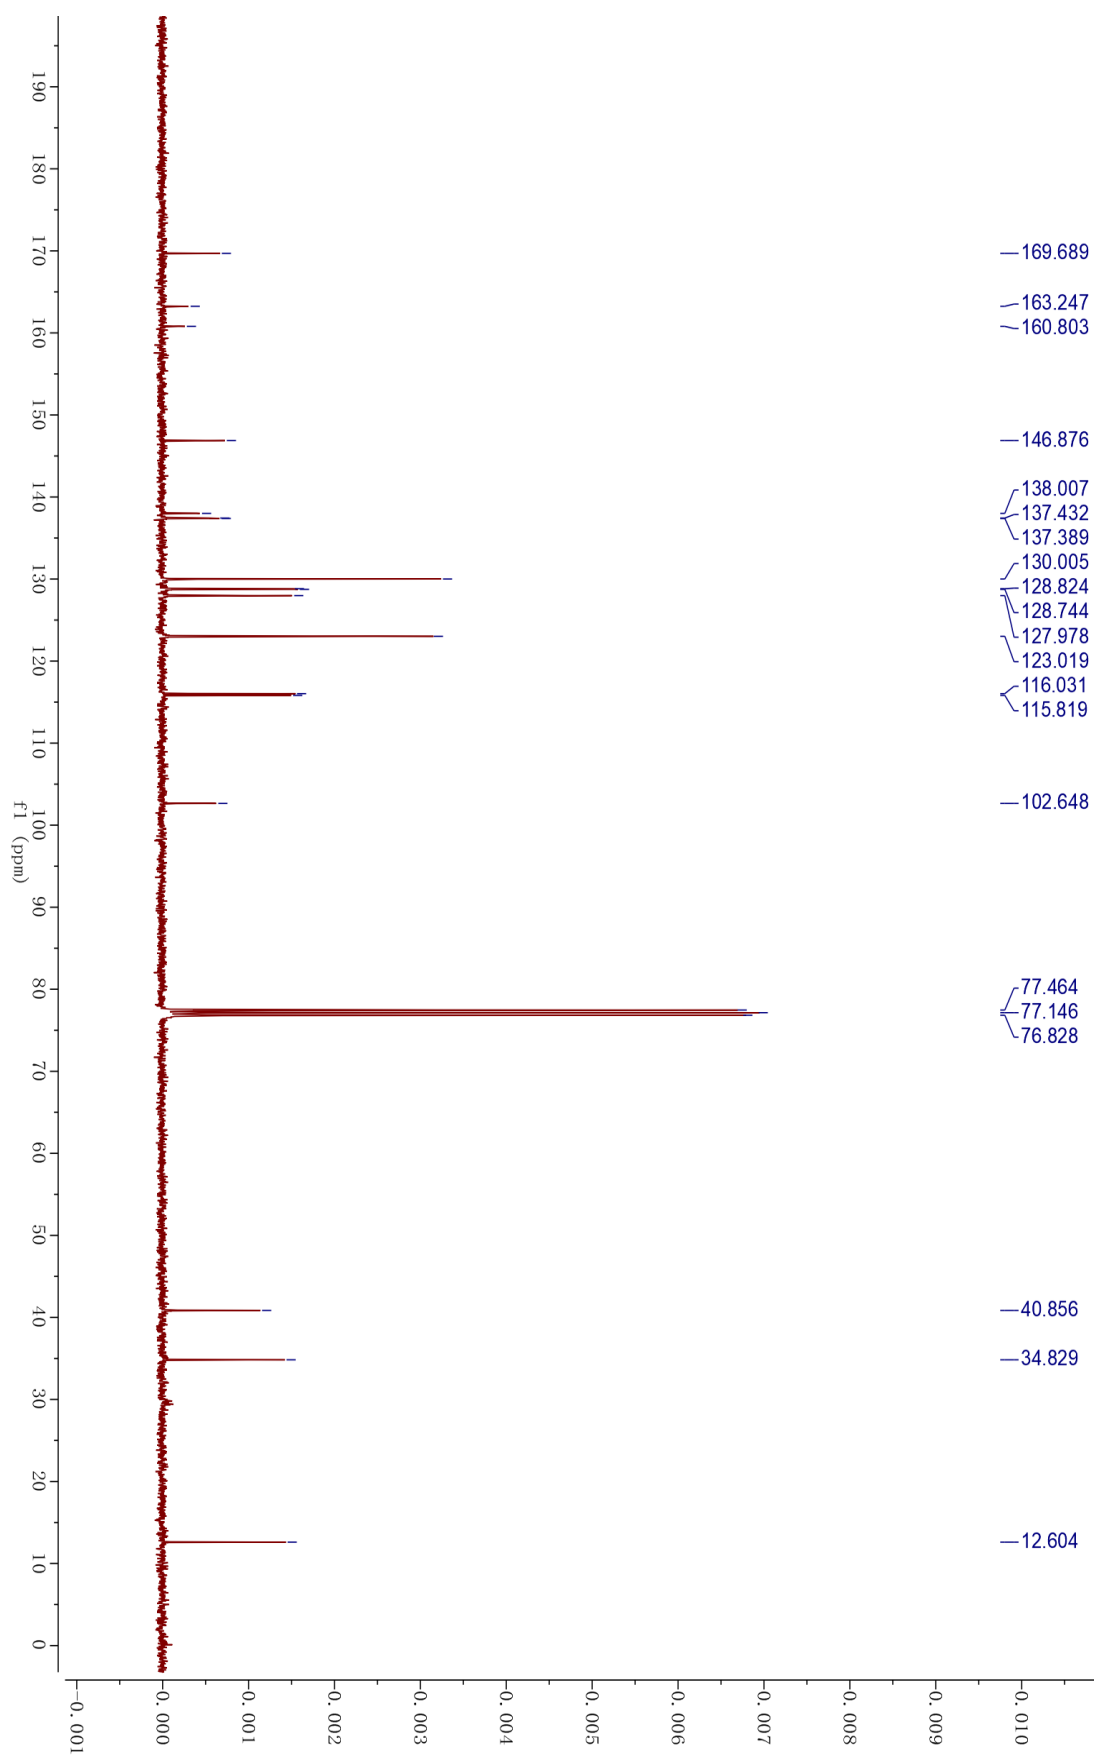

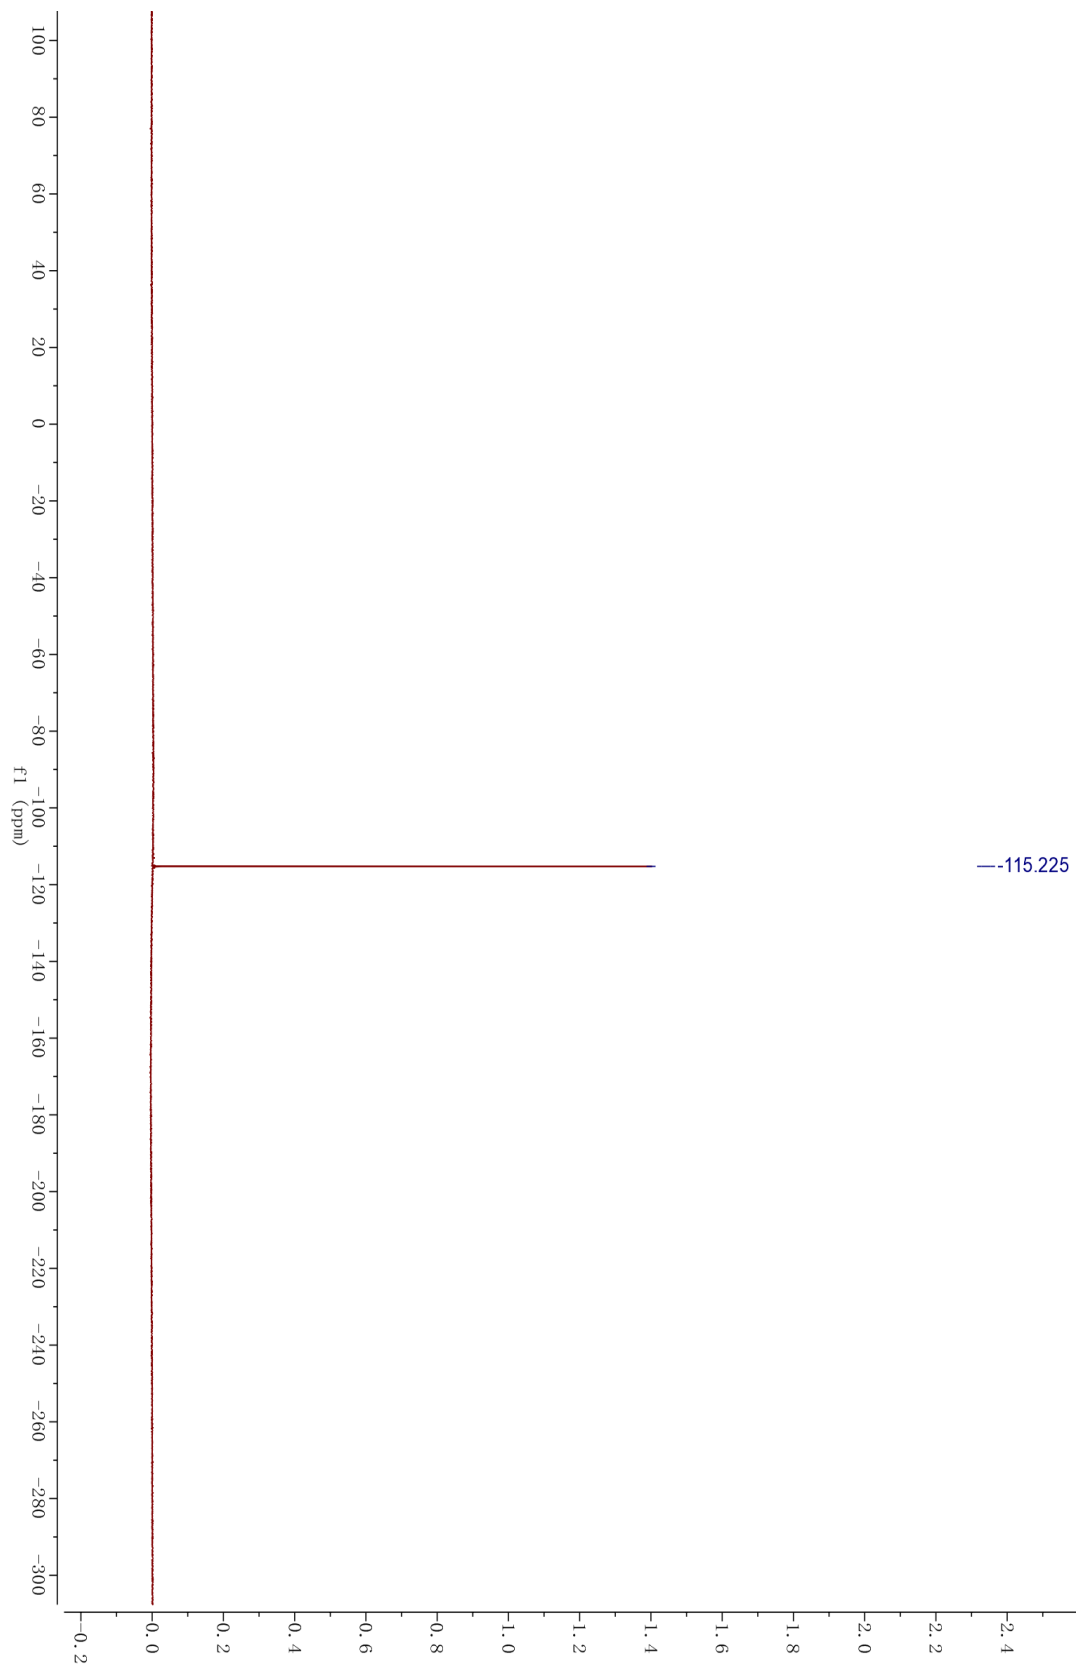

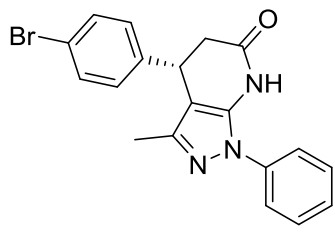

3c

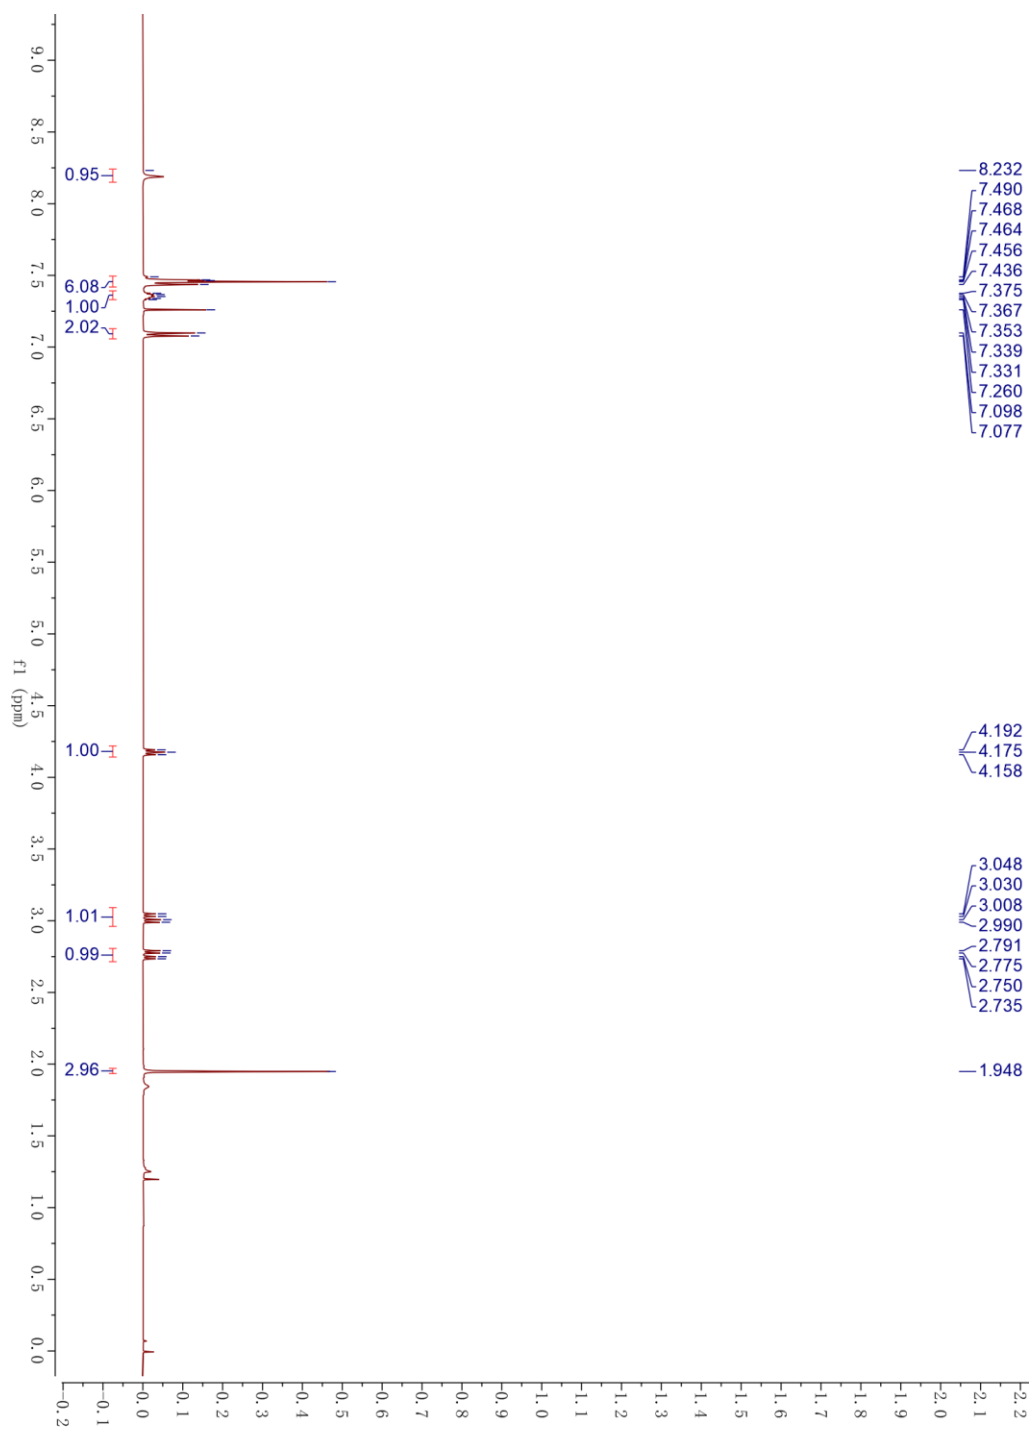

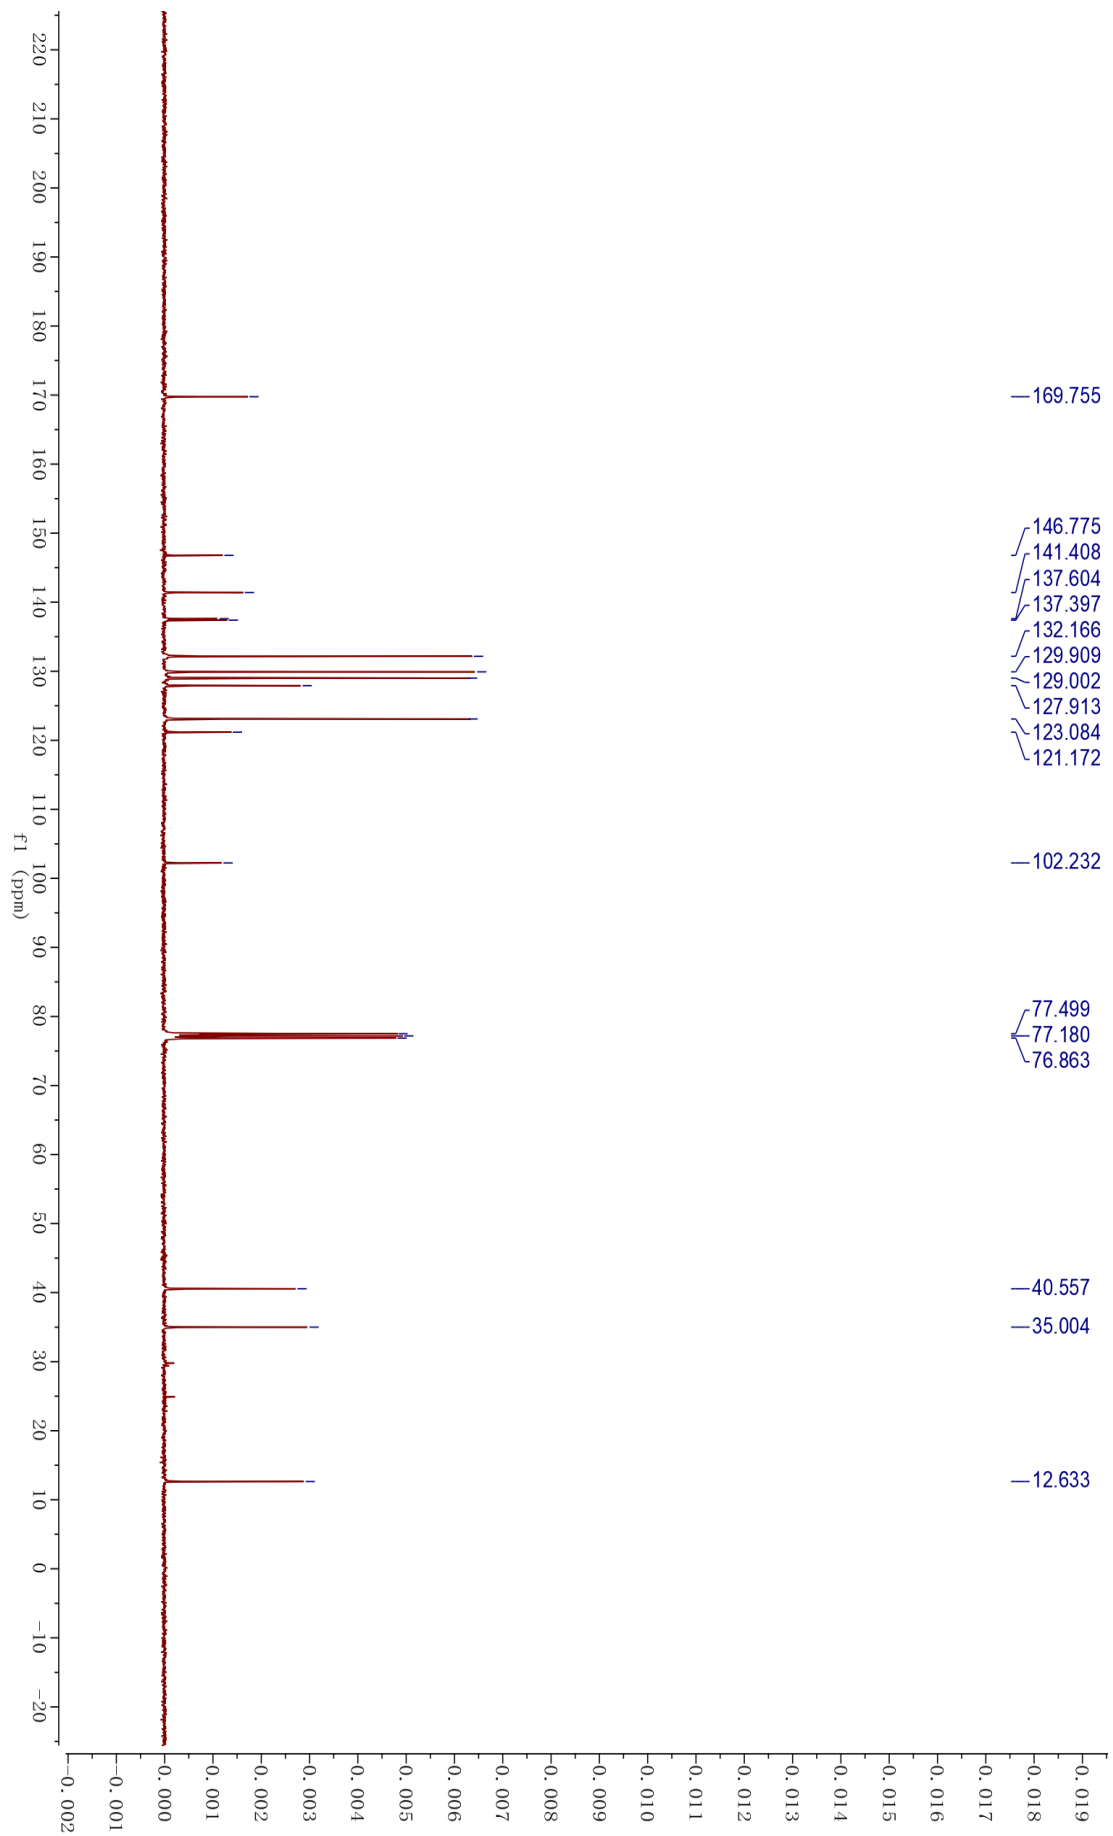

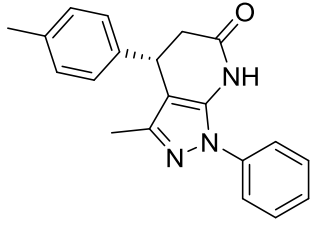

**3d**

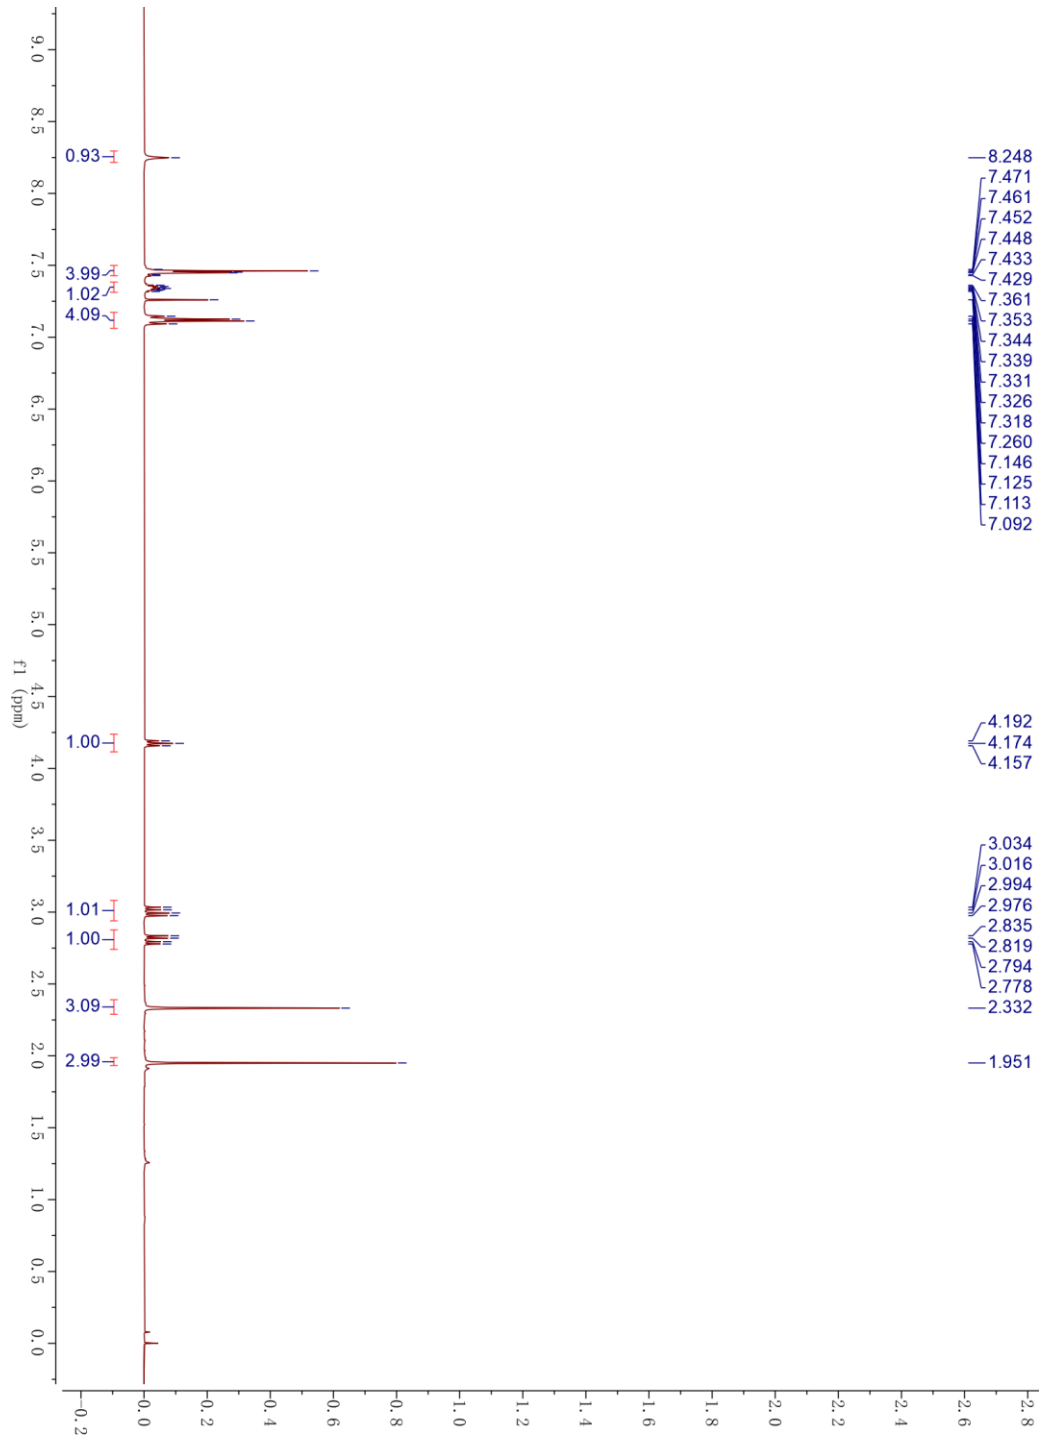

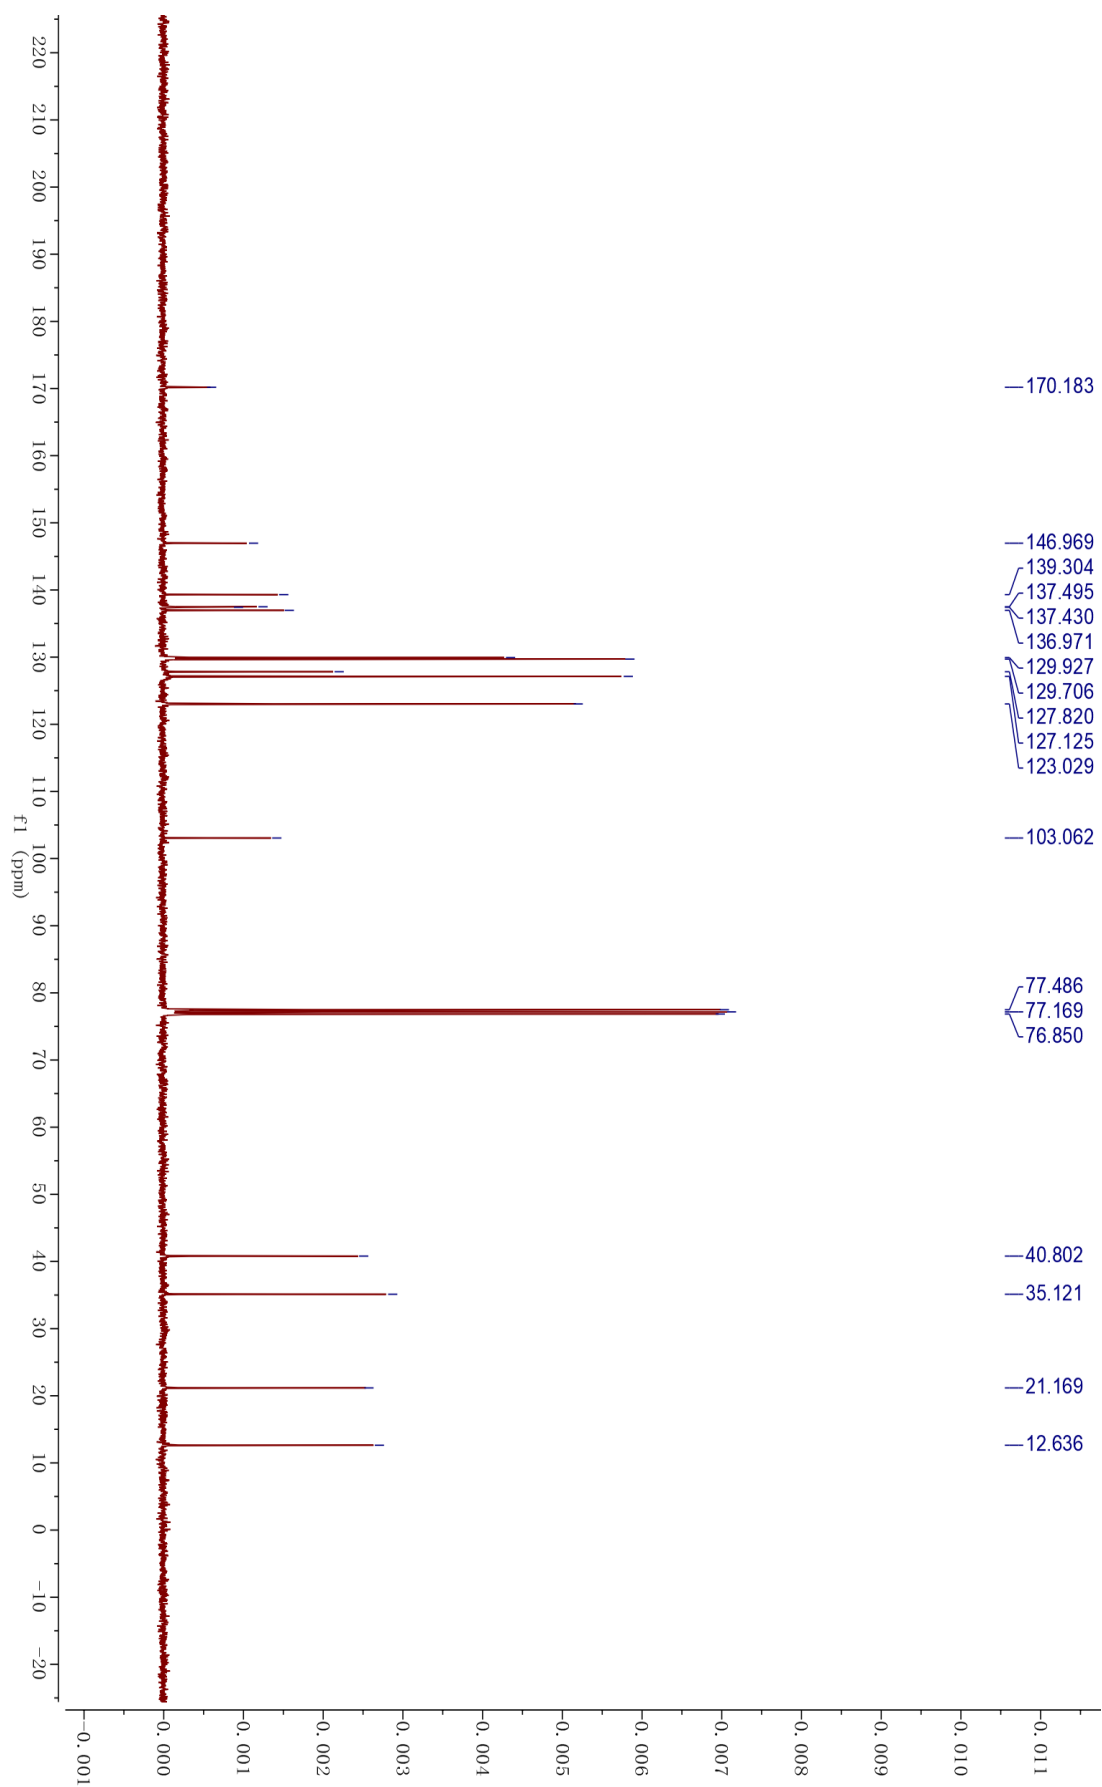

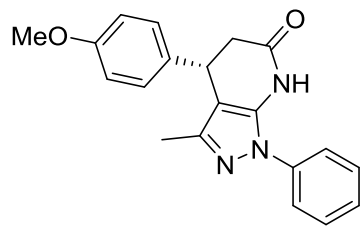

**3e**

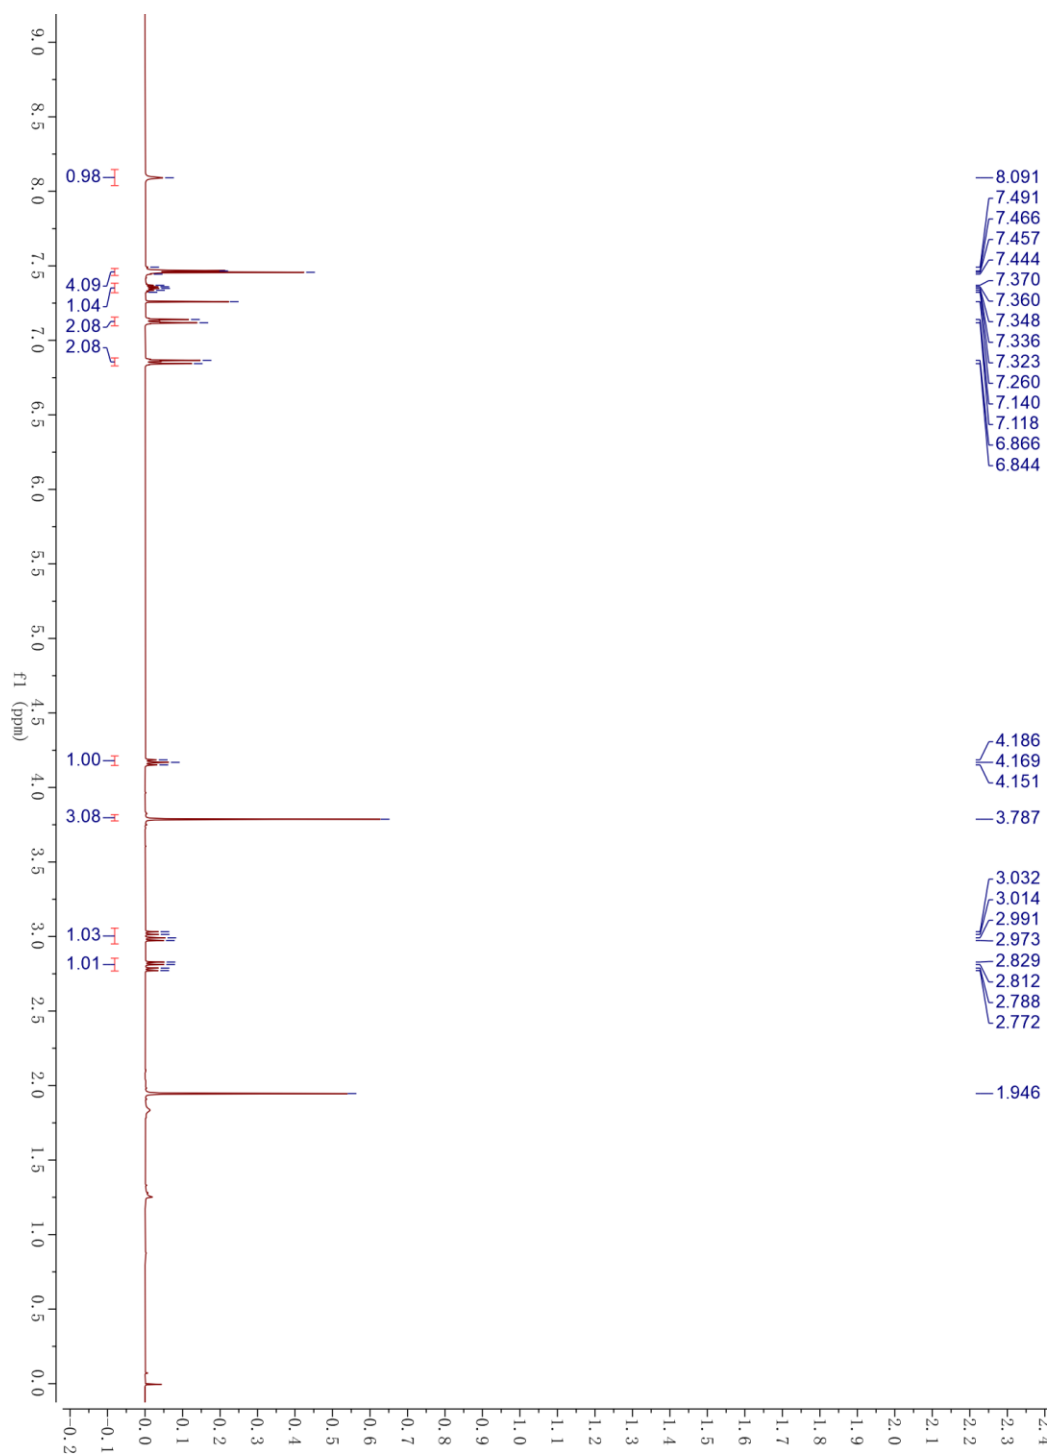



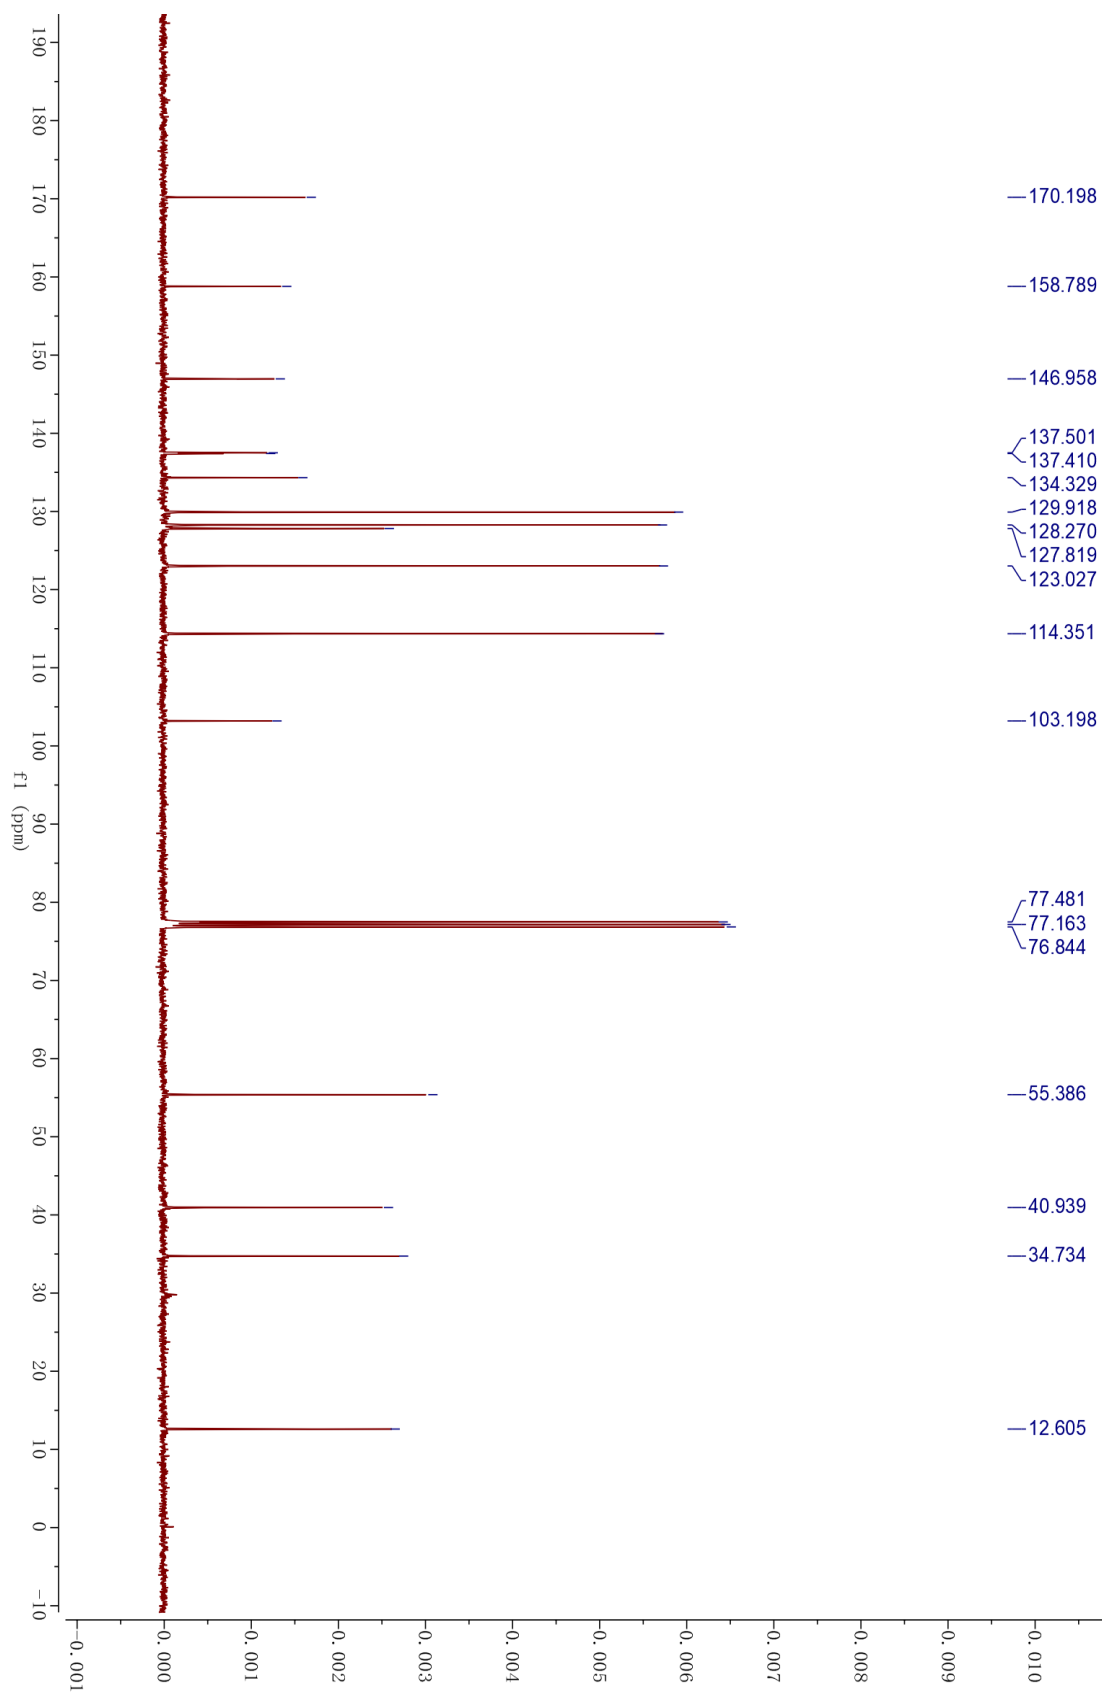

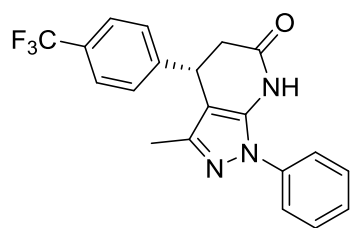

3f

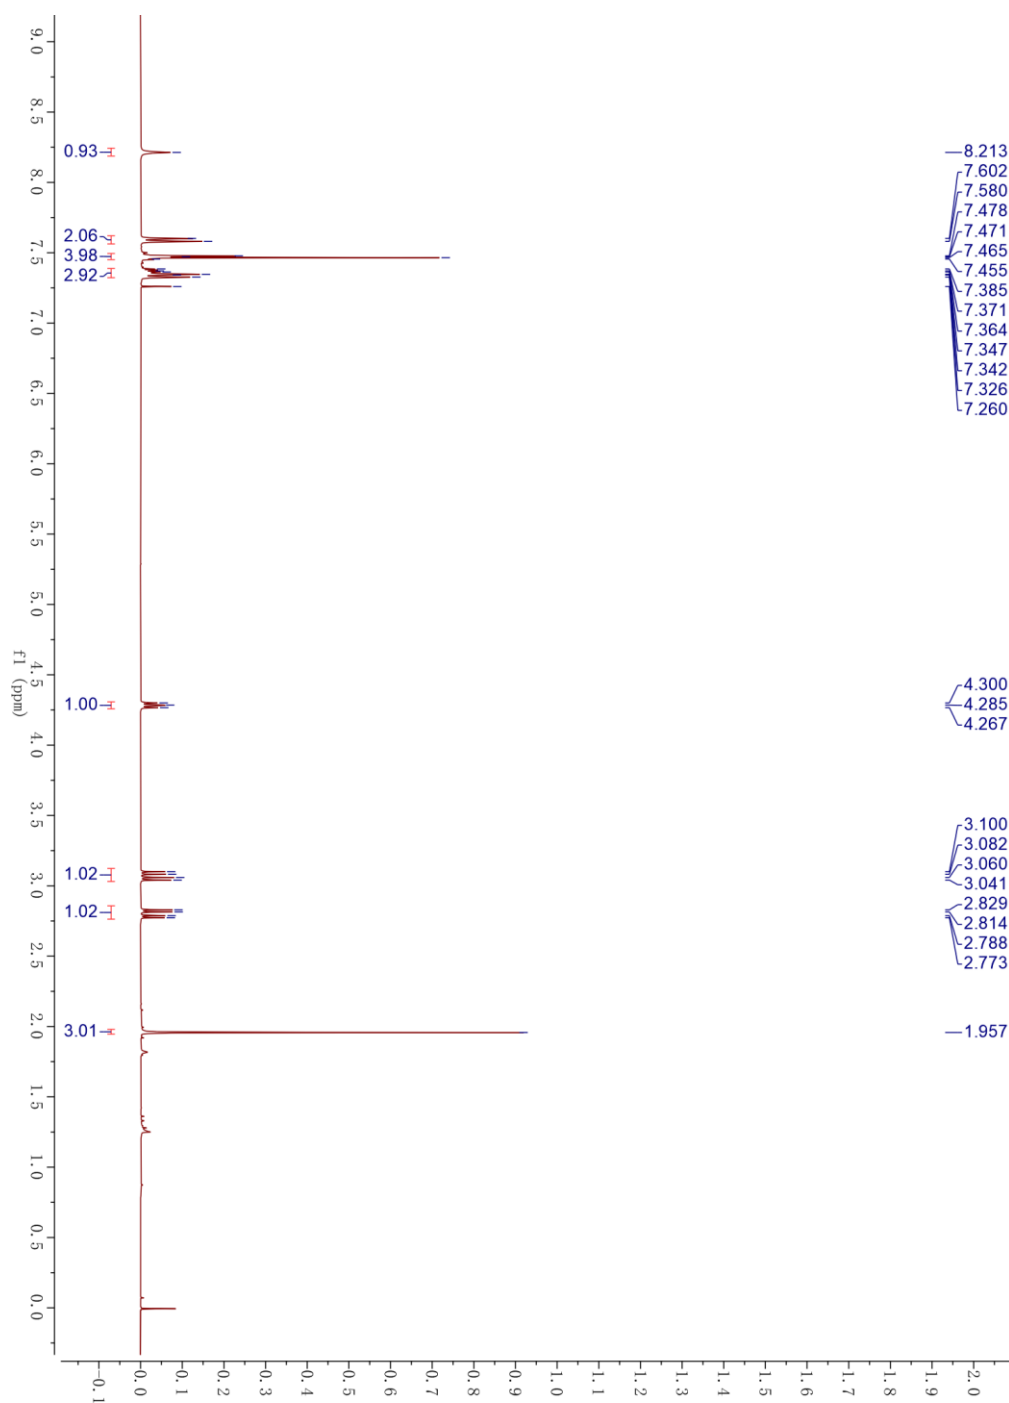

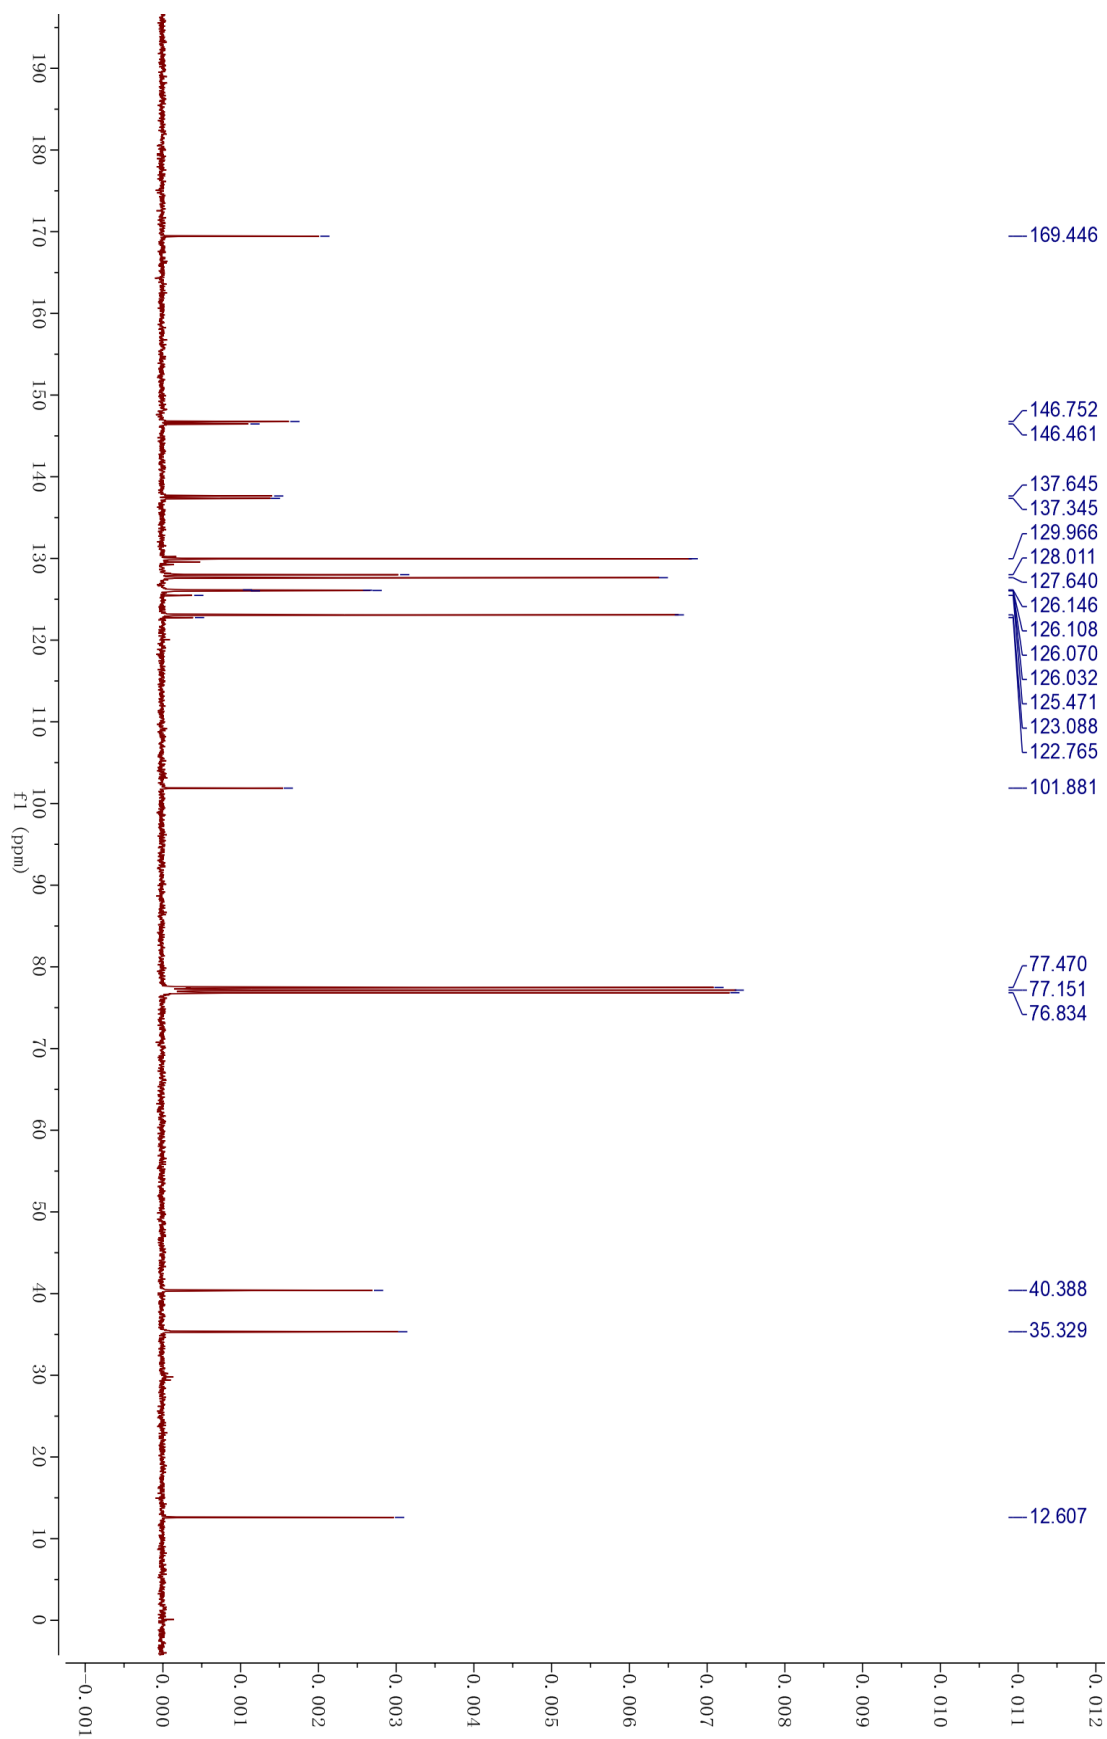

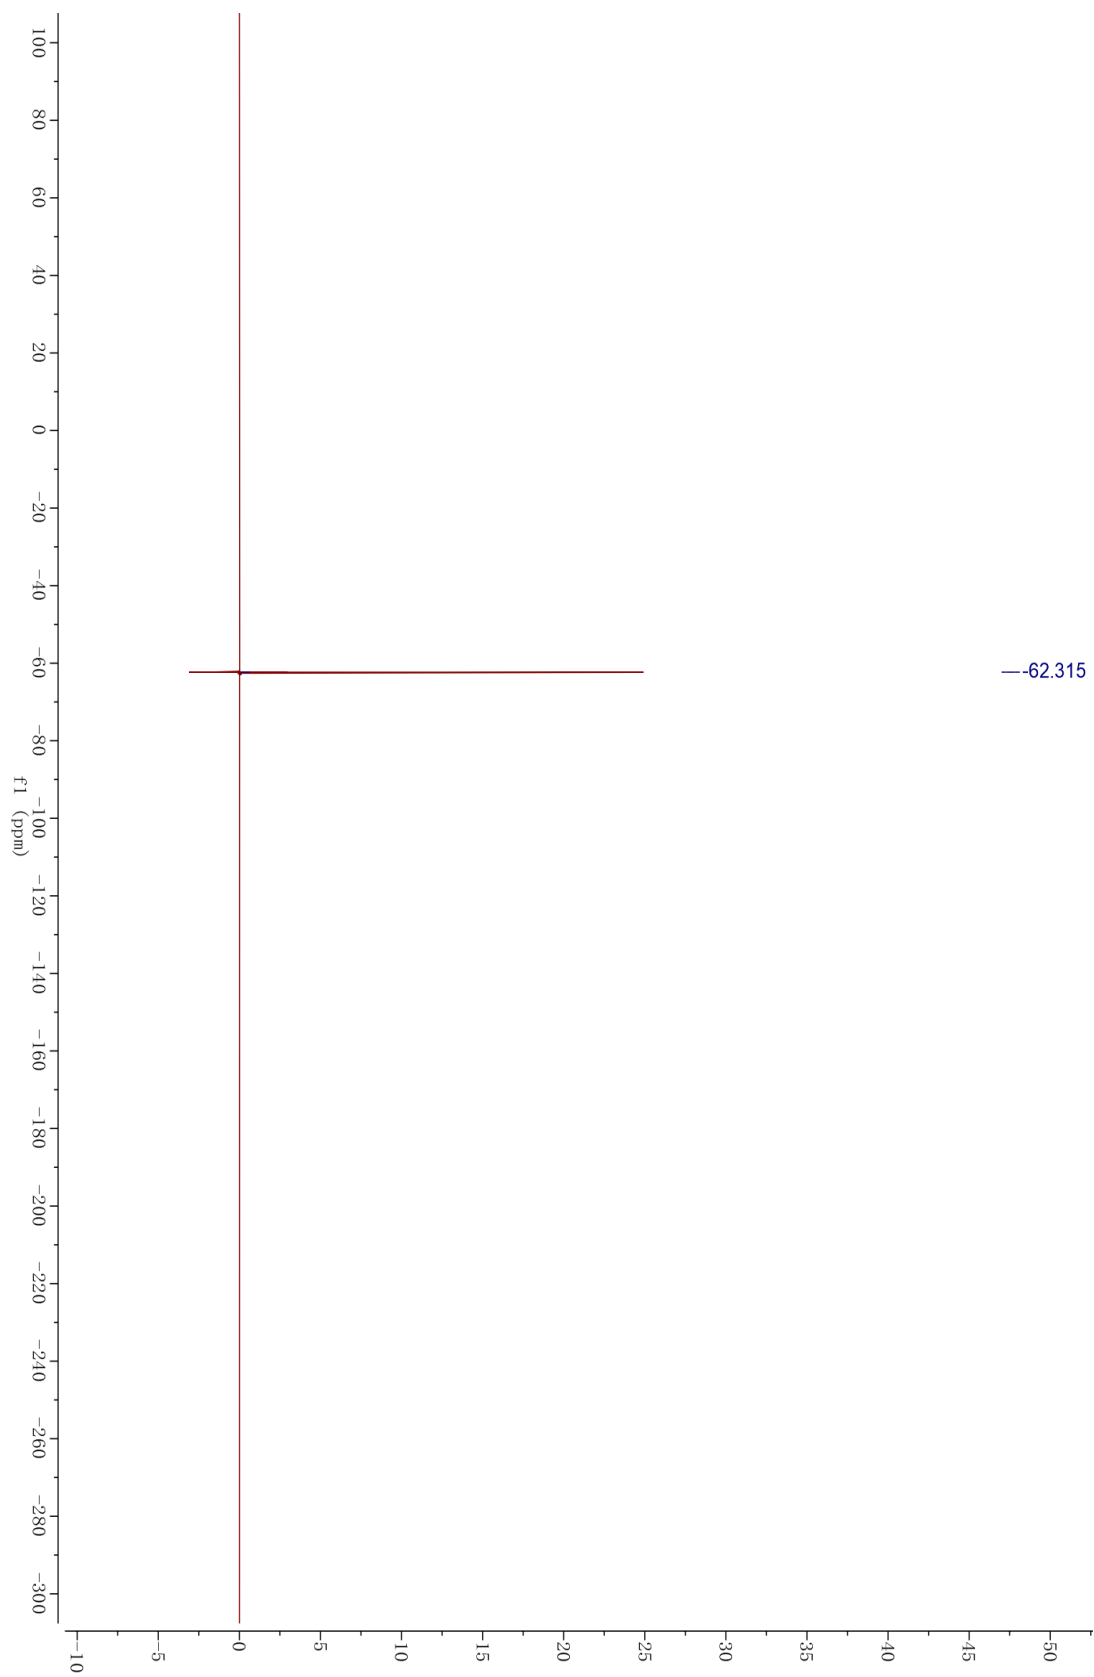

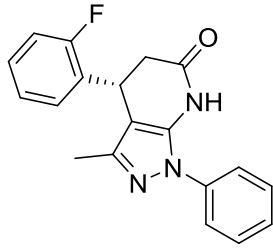

**3g**

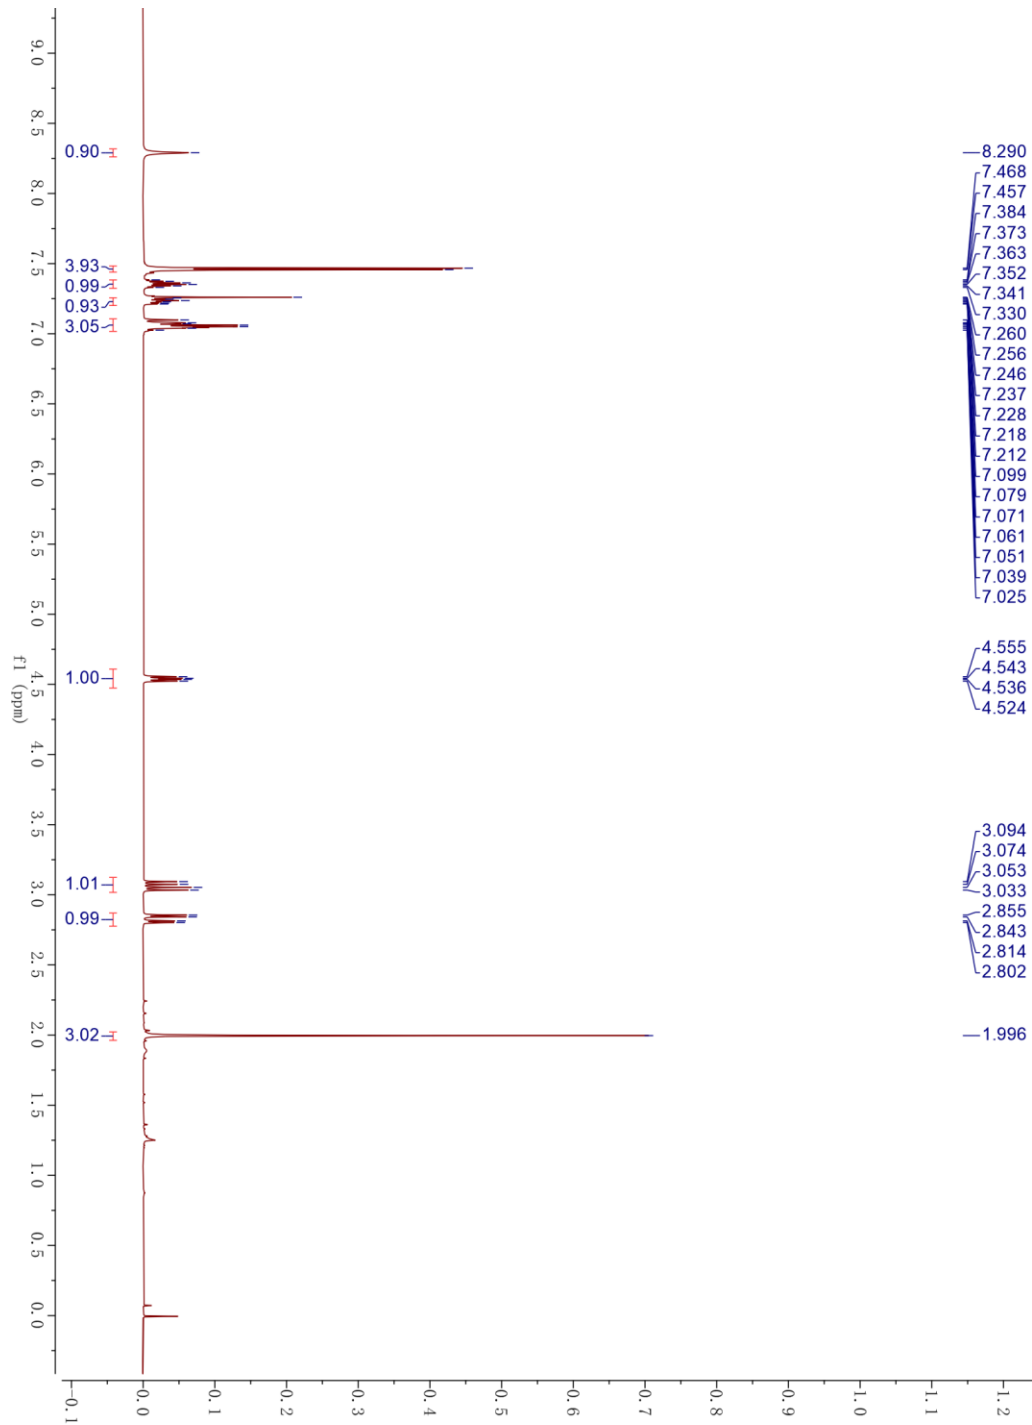

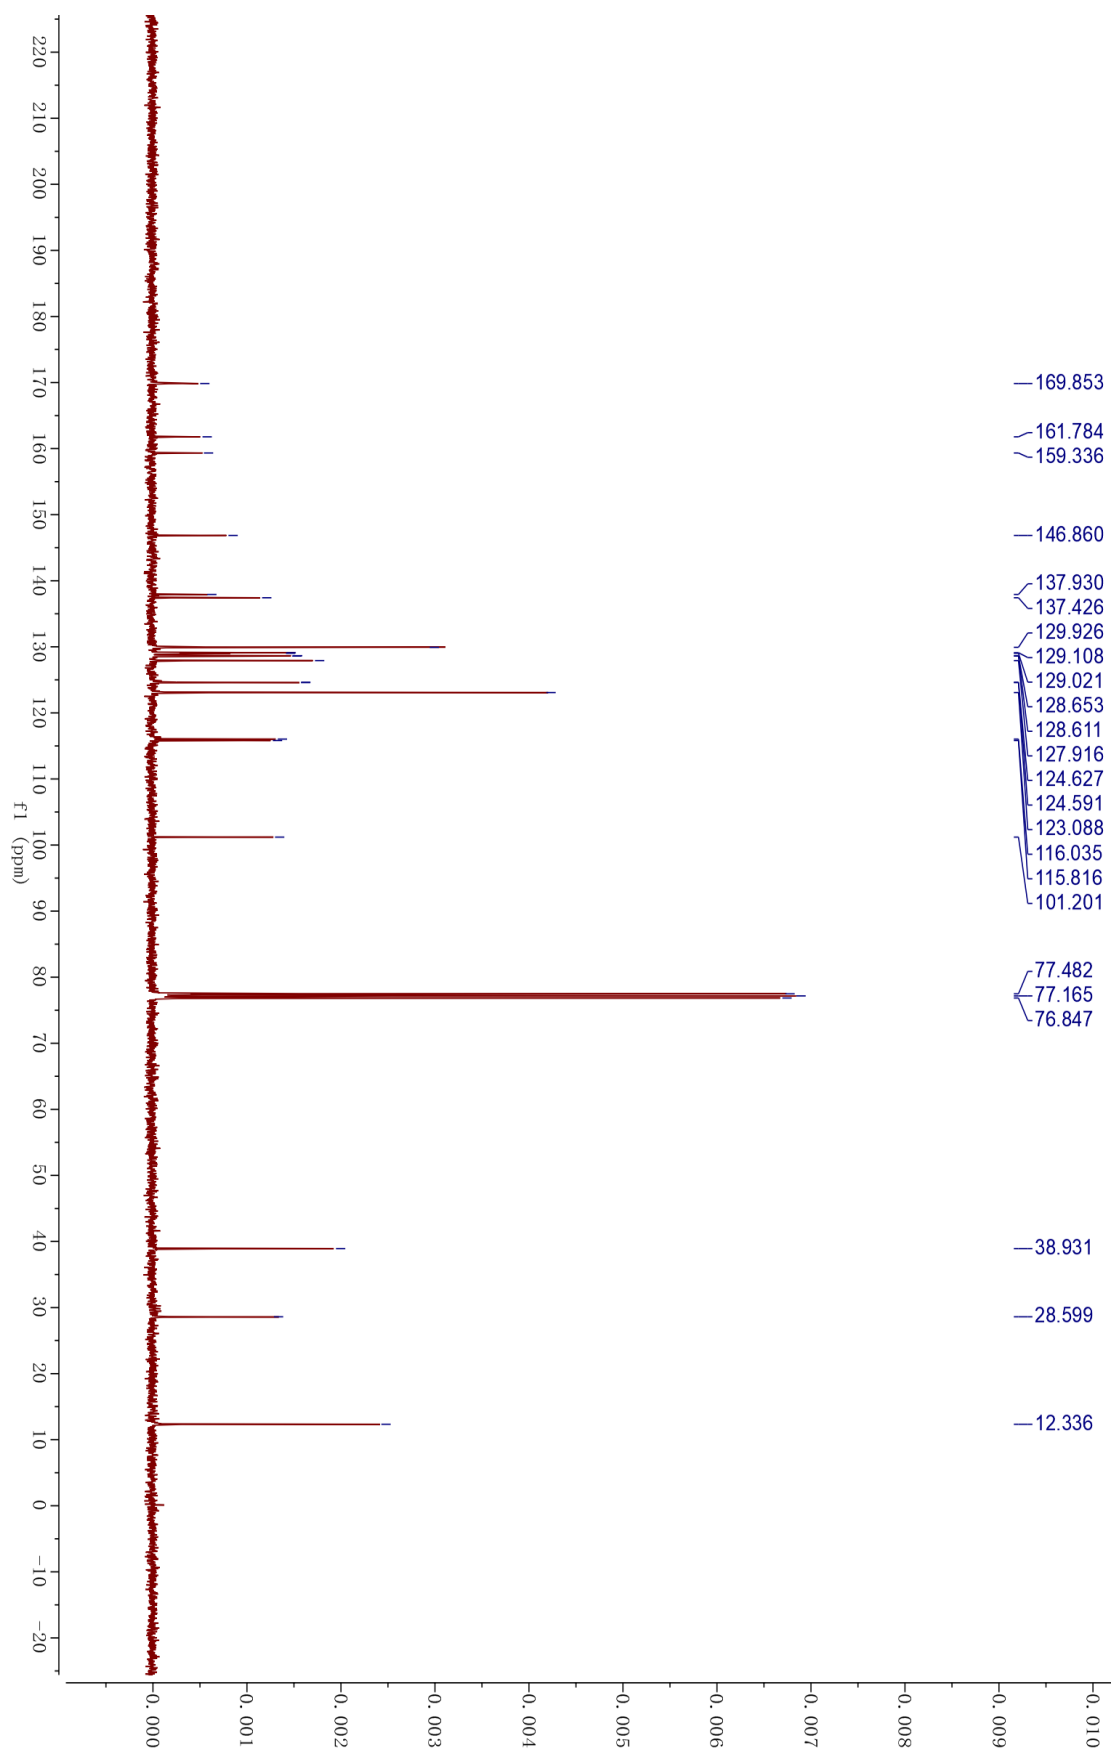

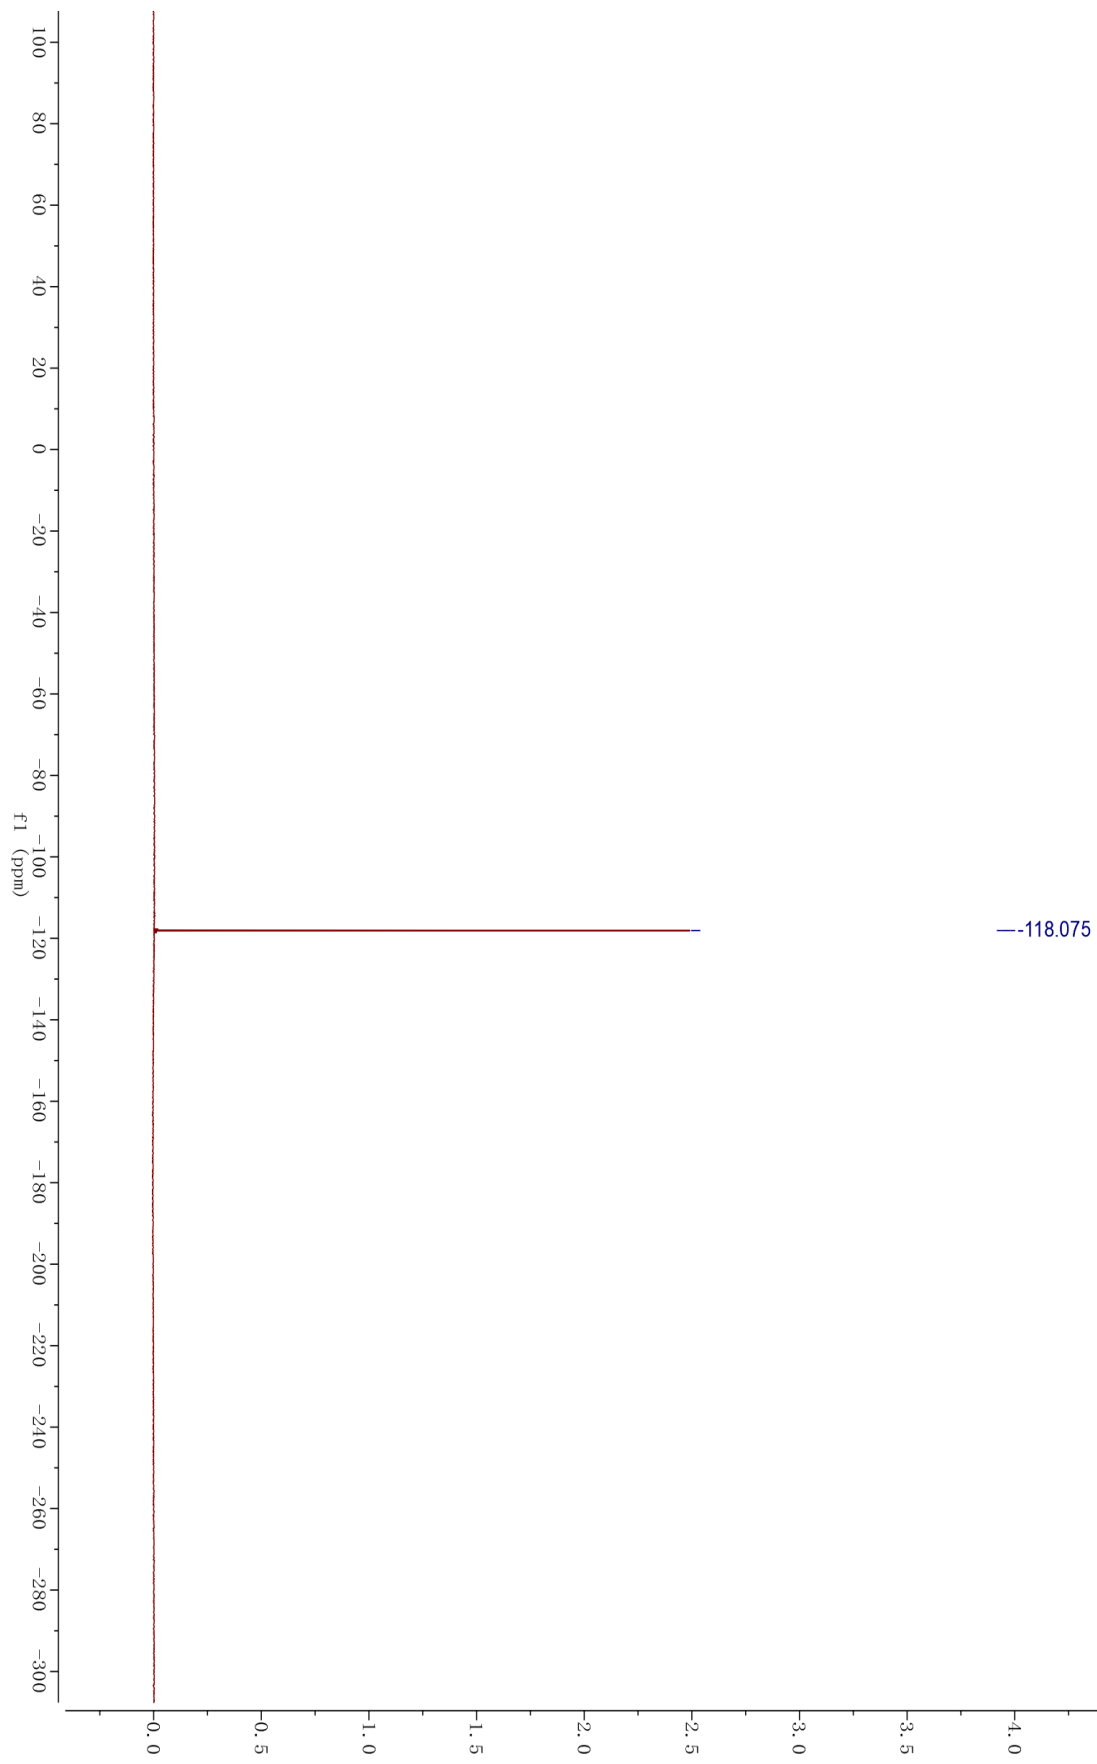

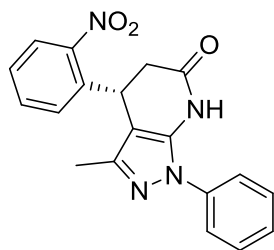

**3h**

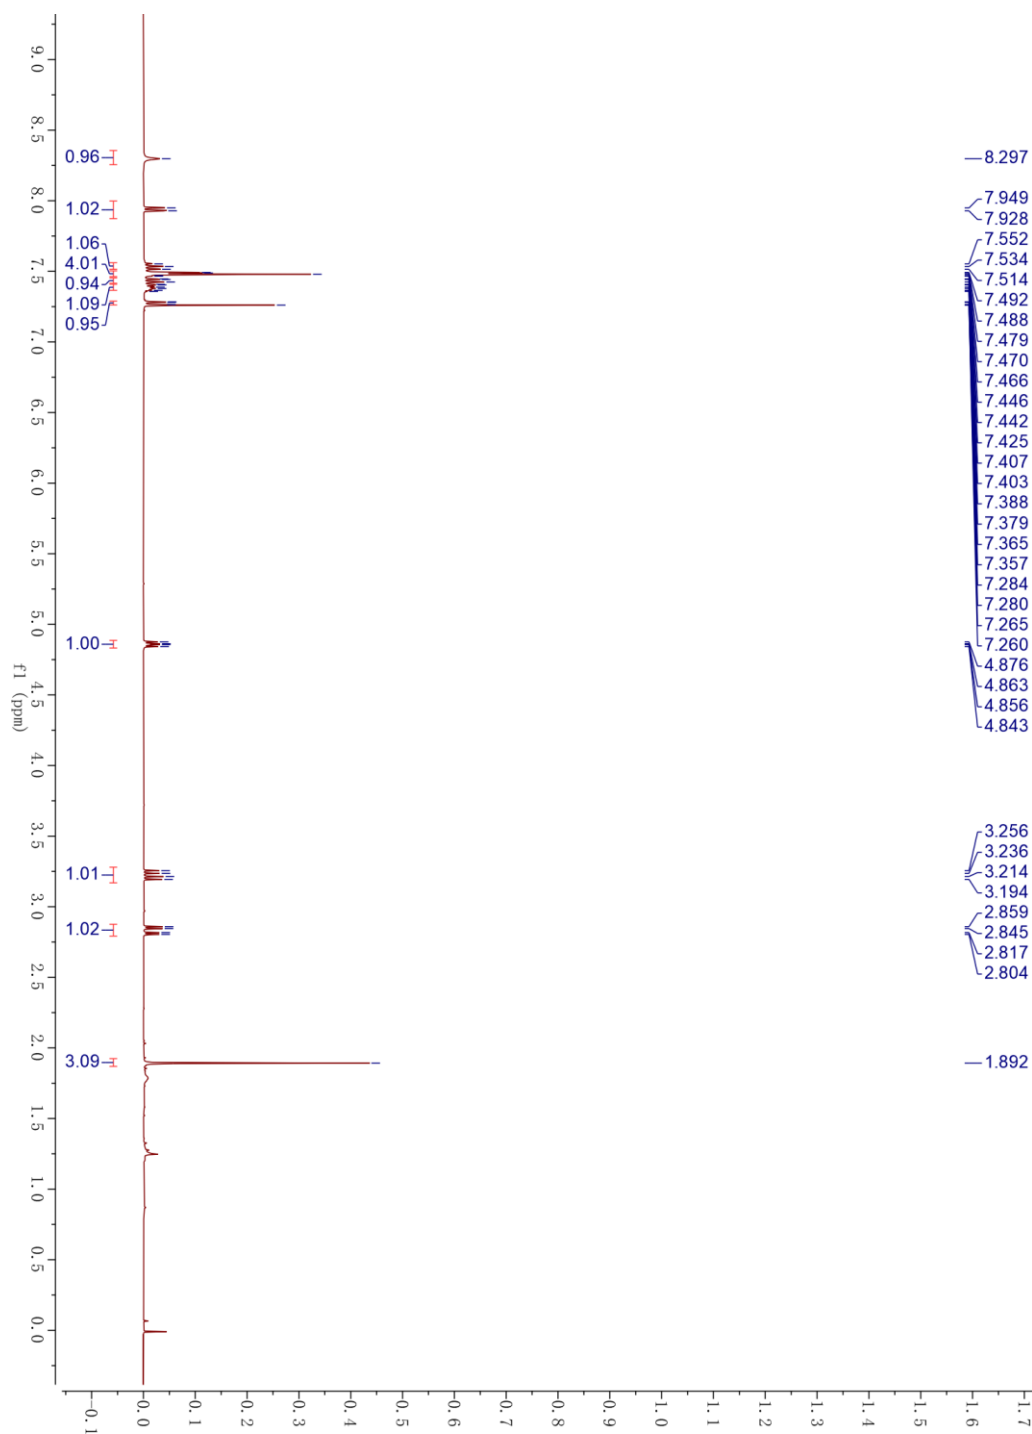



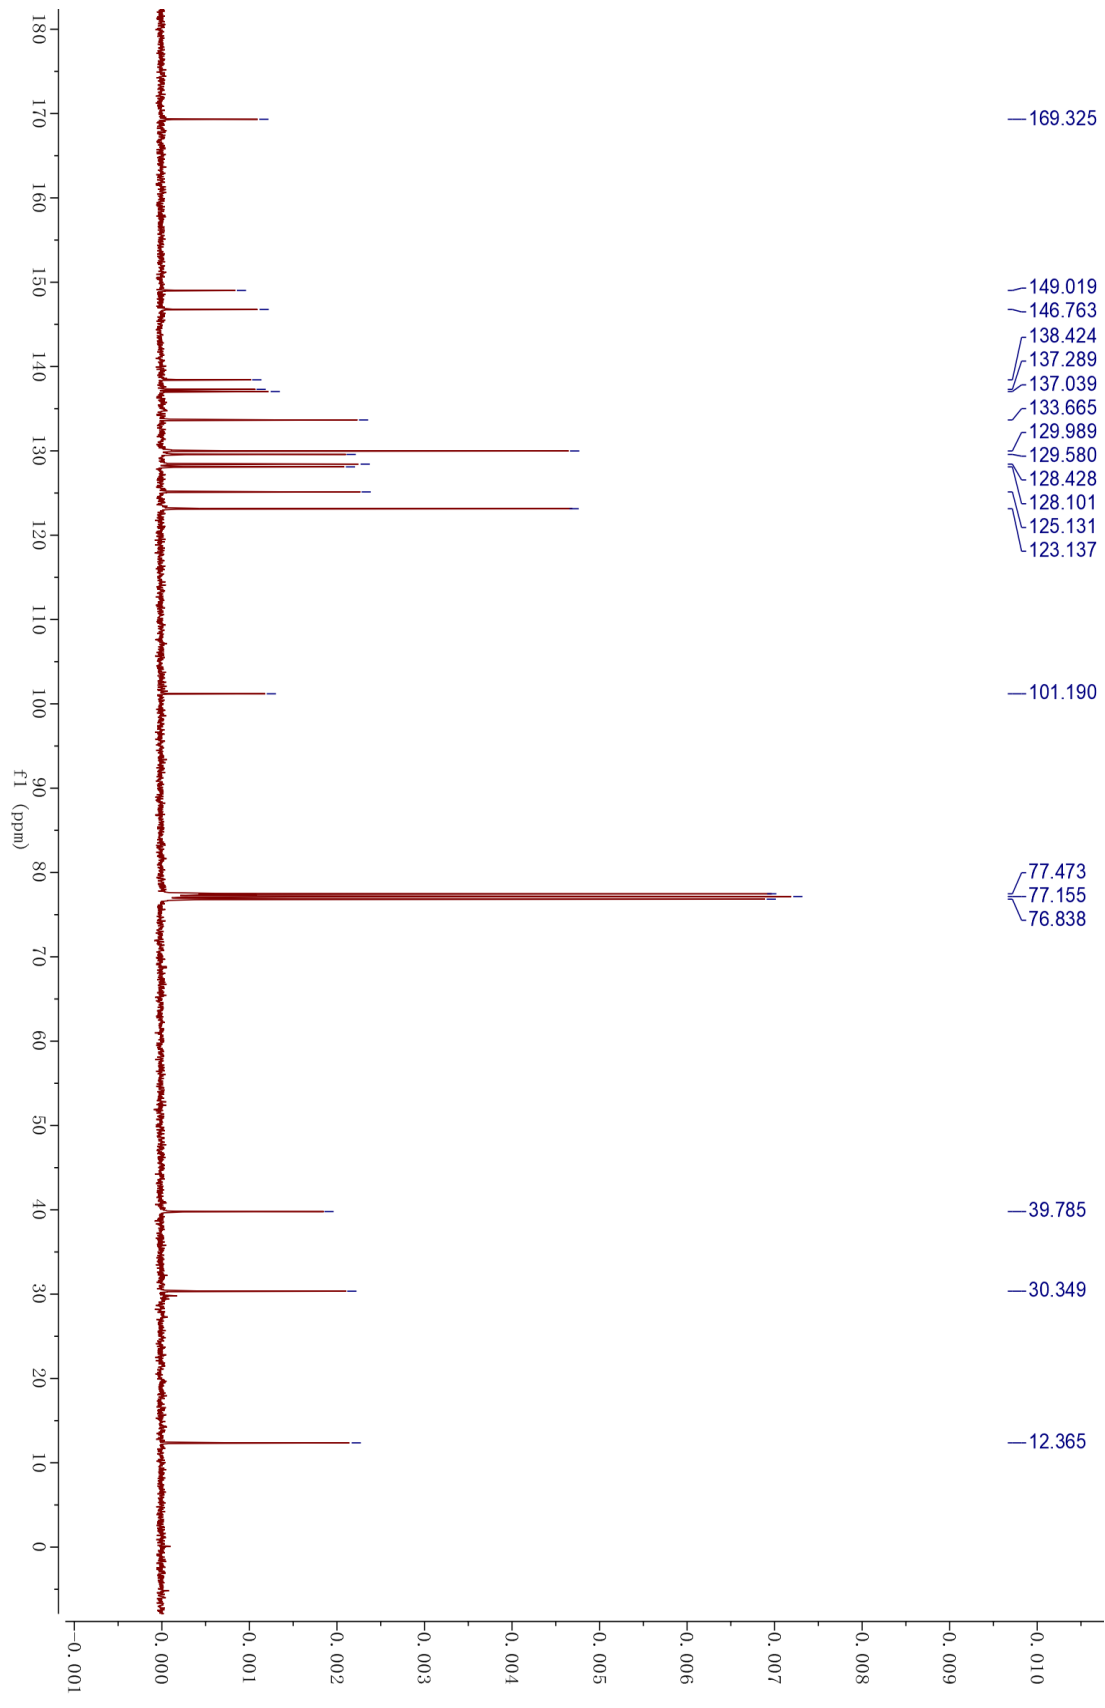

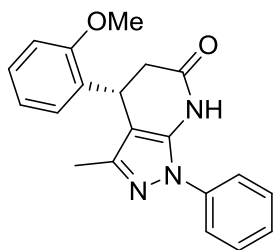

**3i**

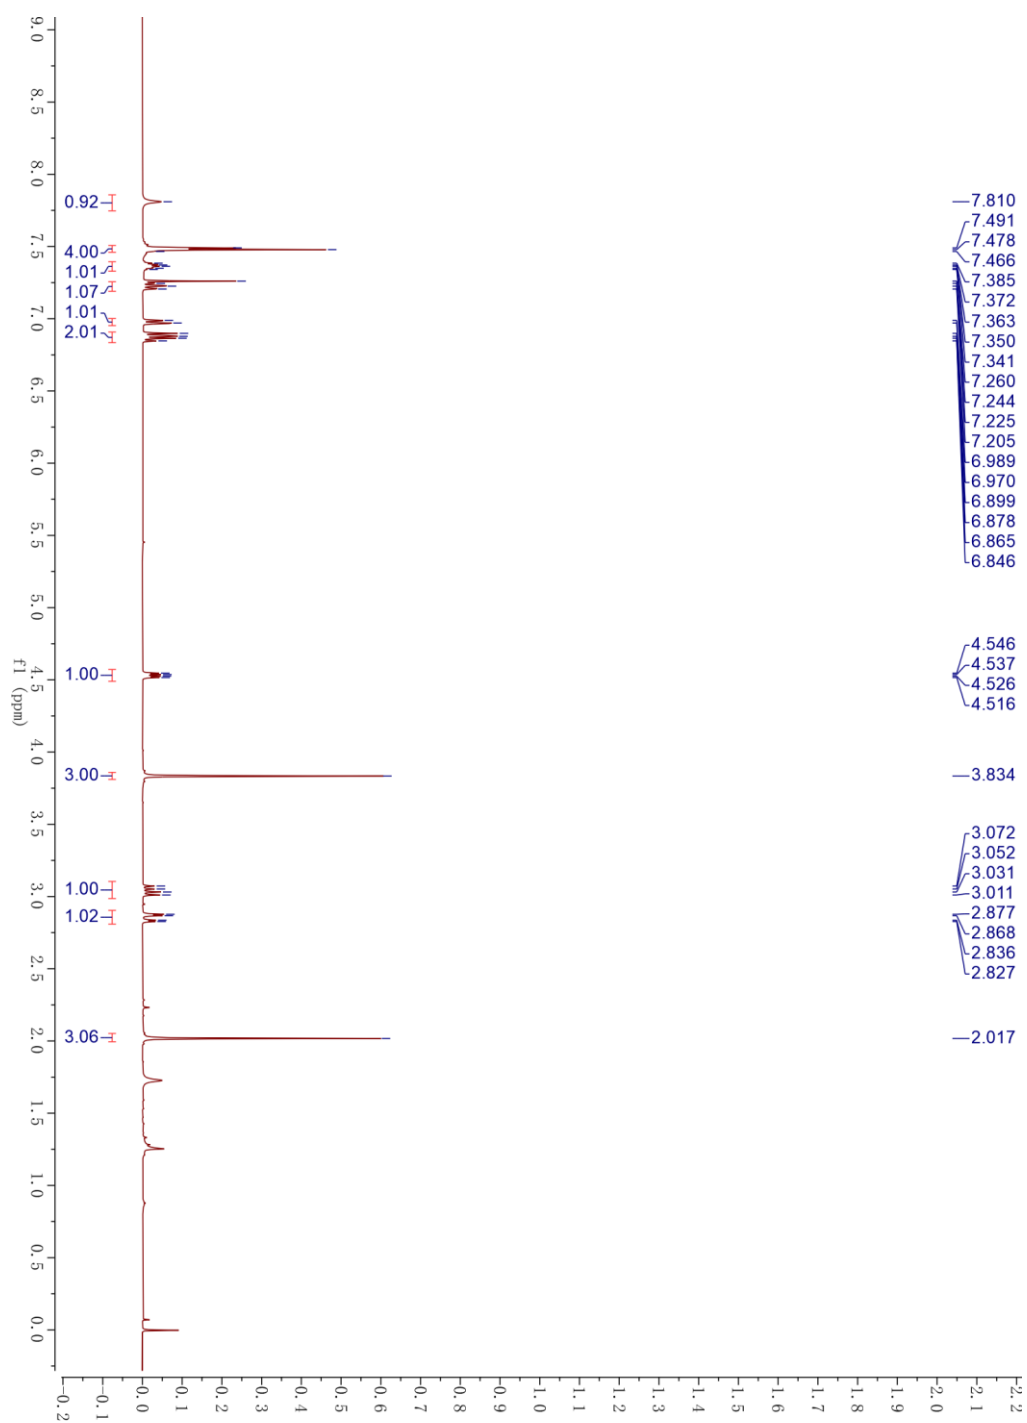

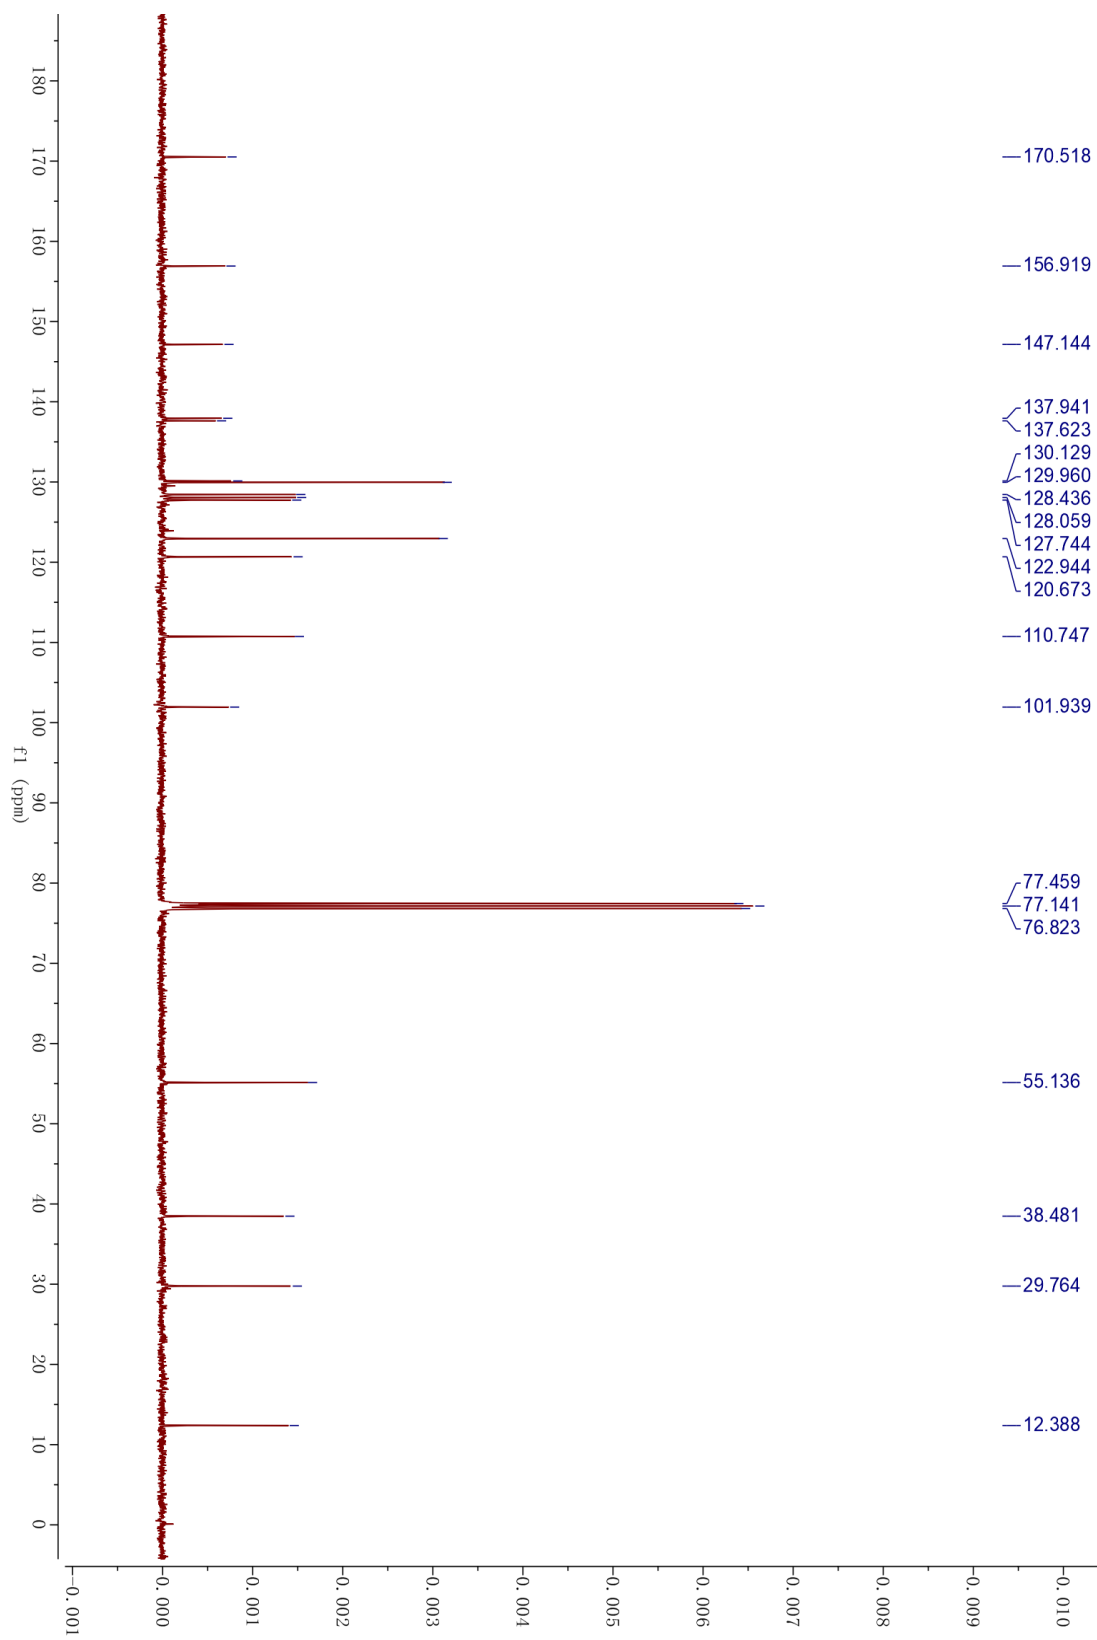

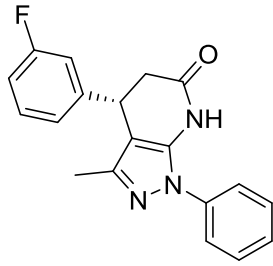

**3j**

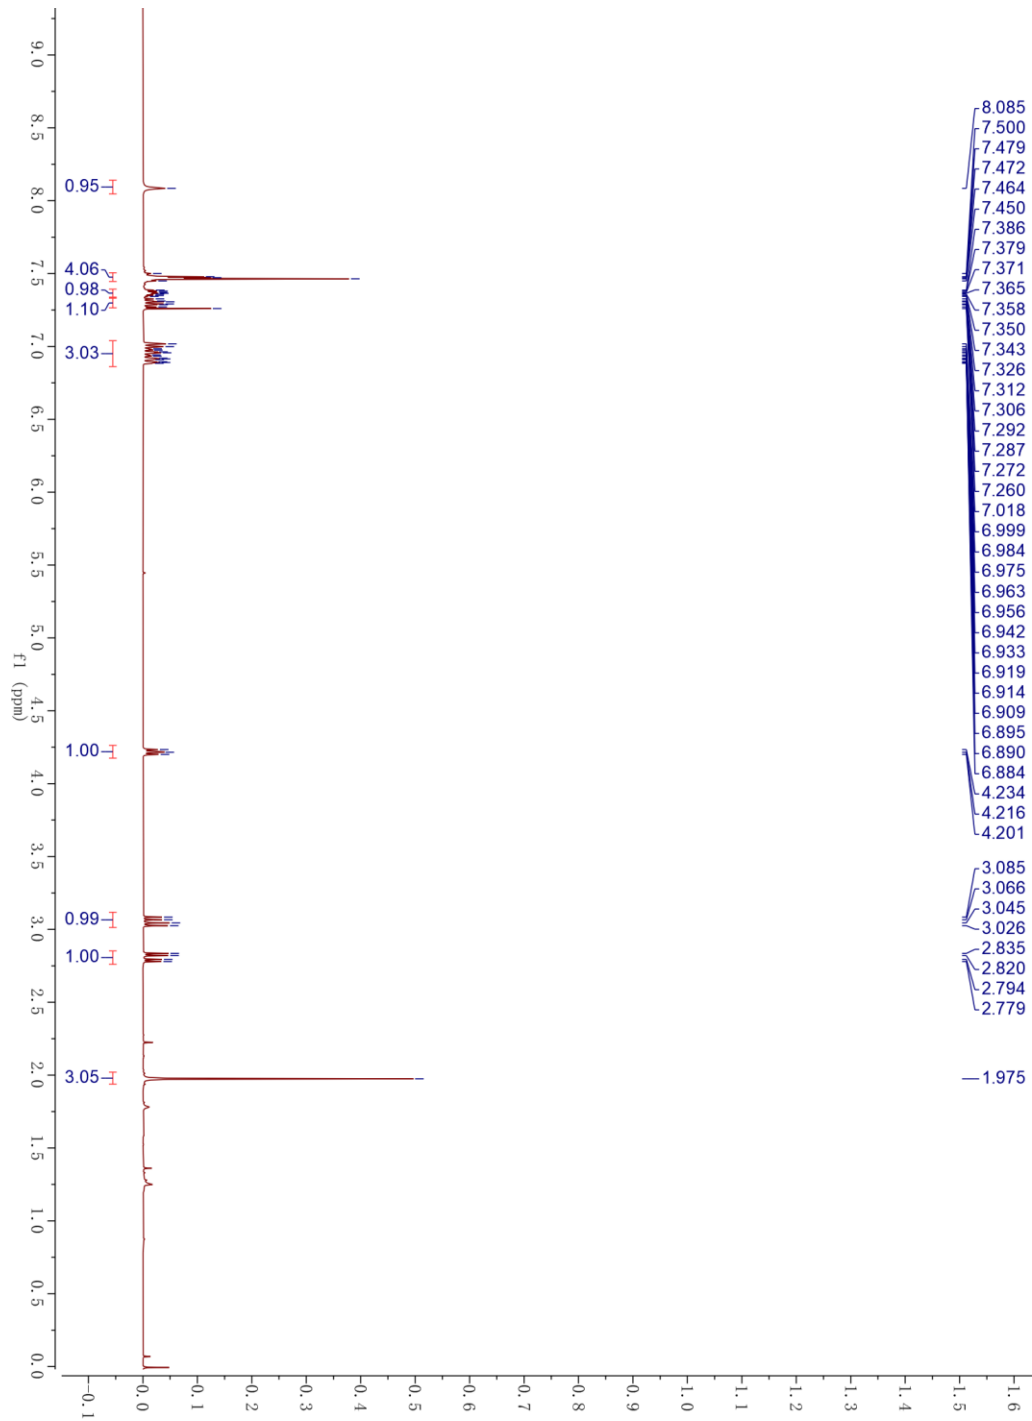

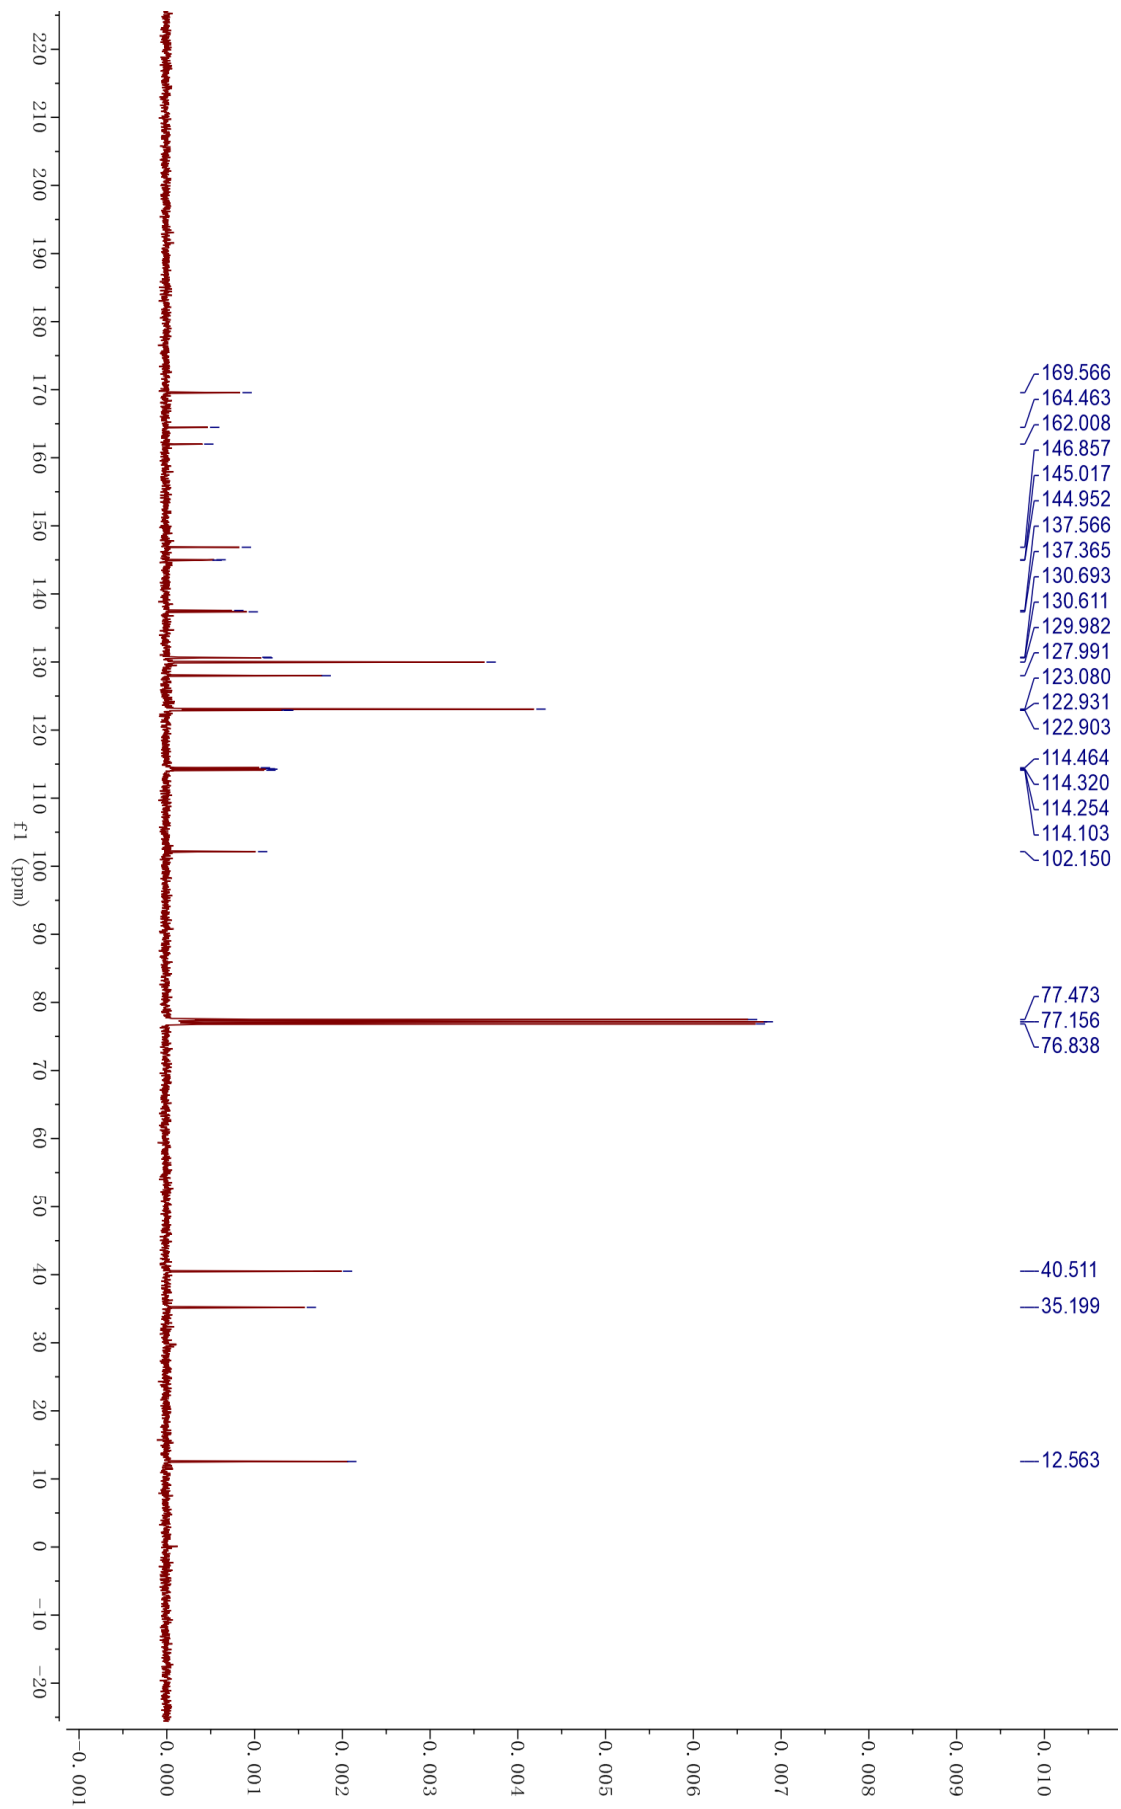

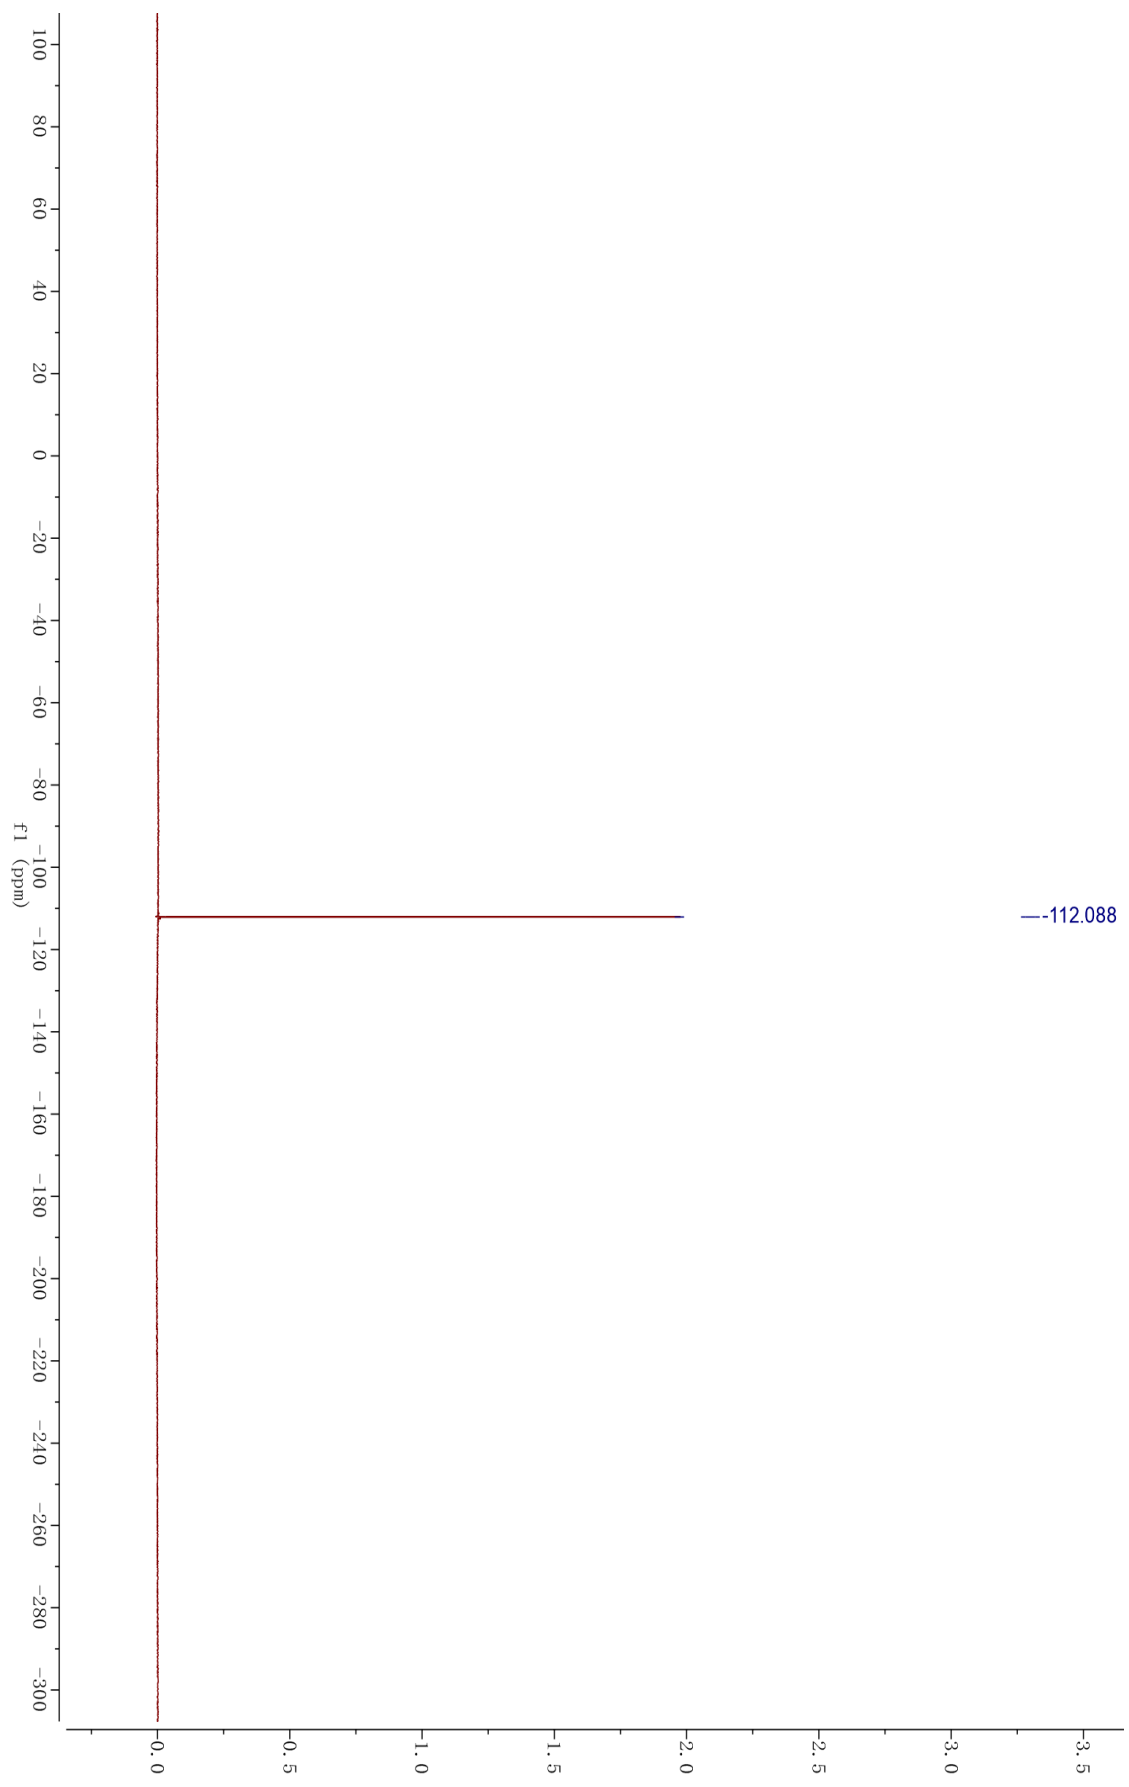

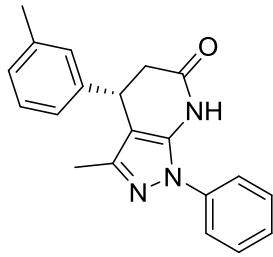

**3k**

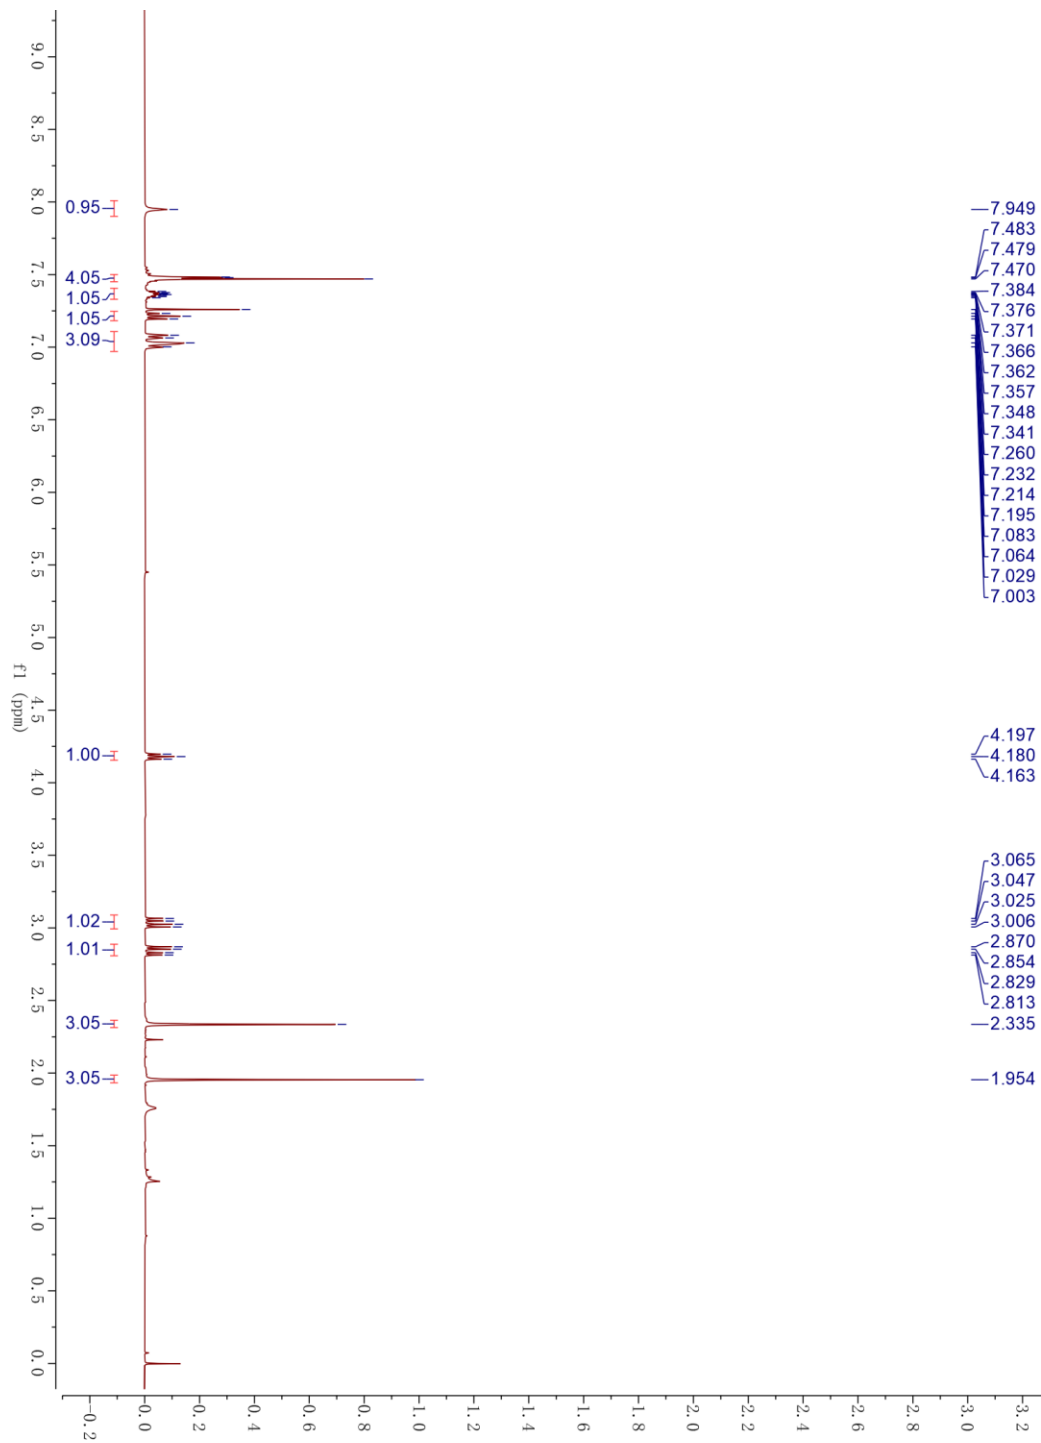

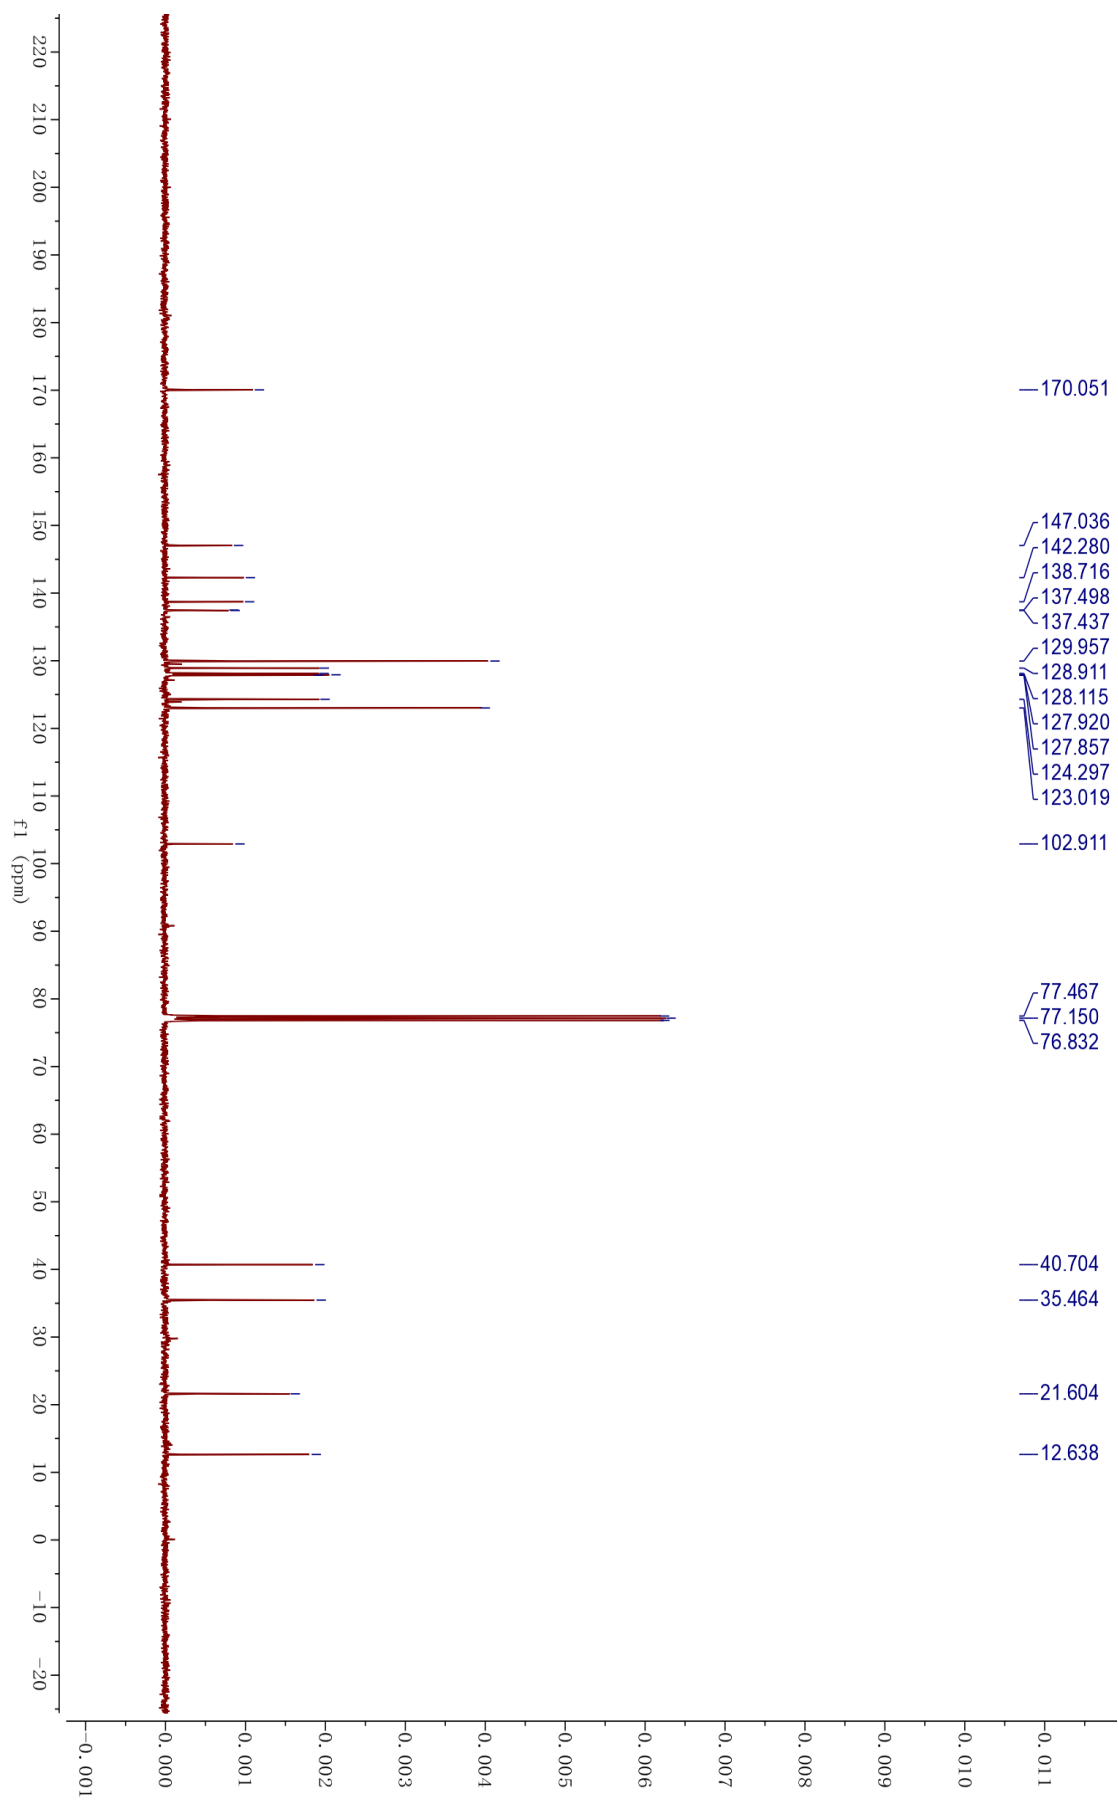



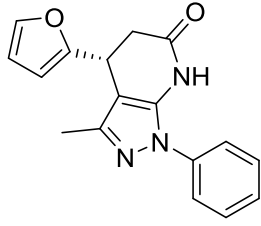

**31**

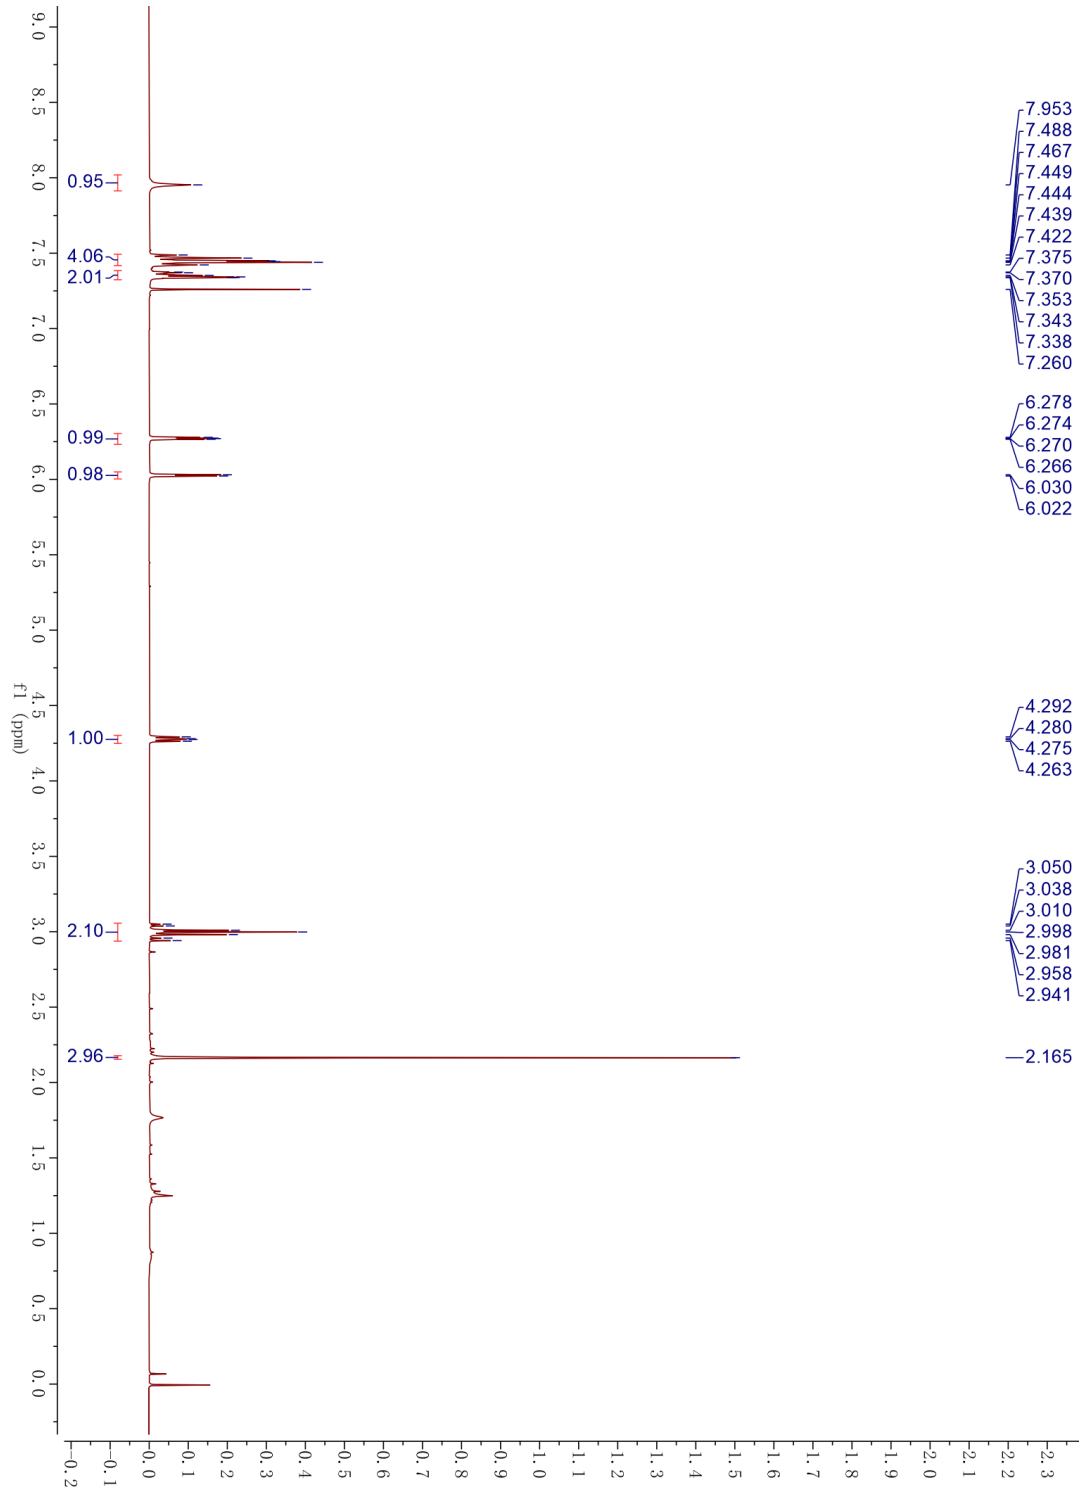

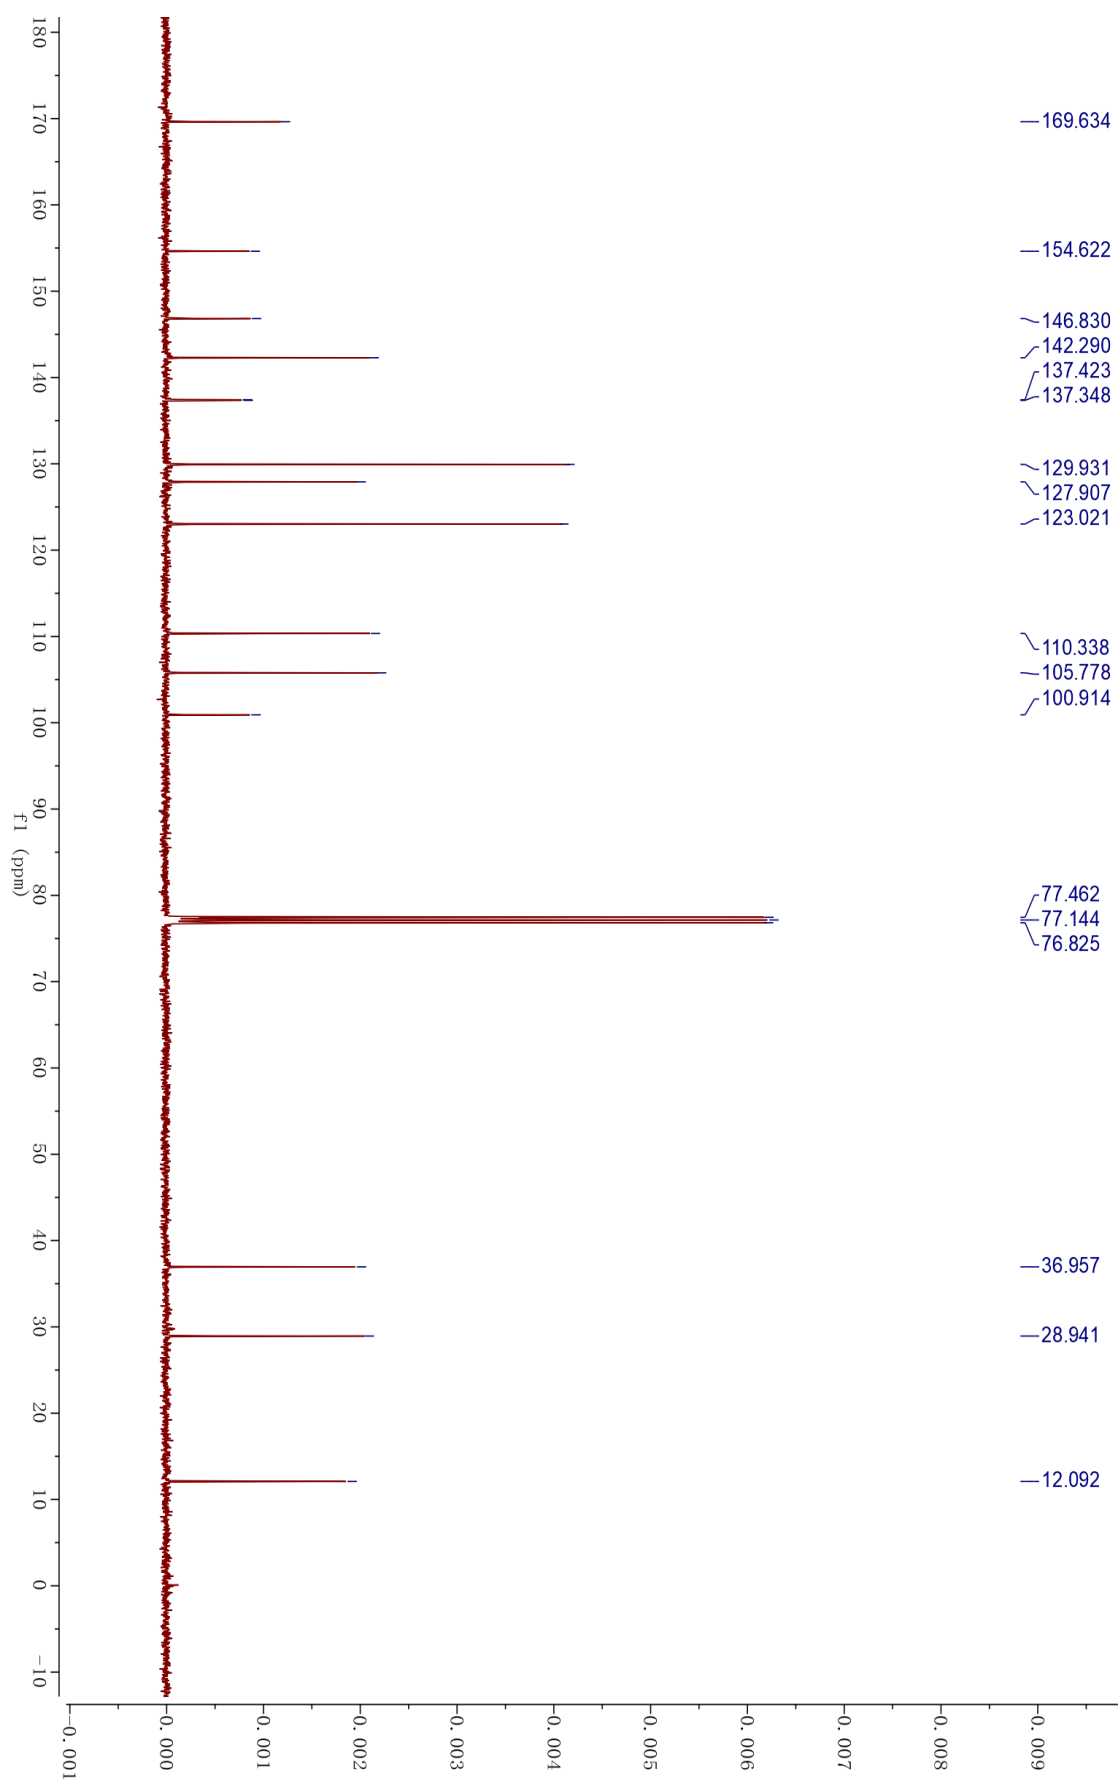

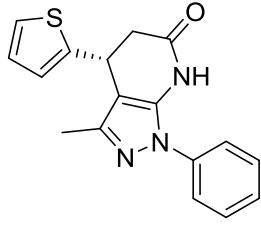

**3m**

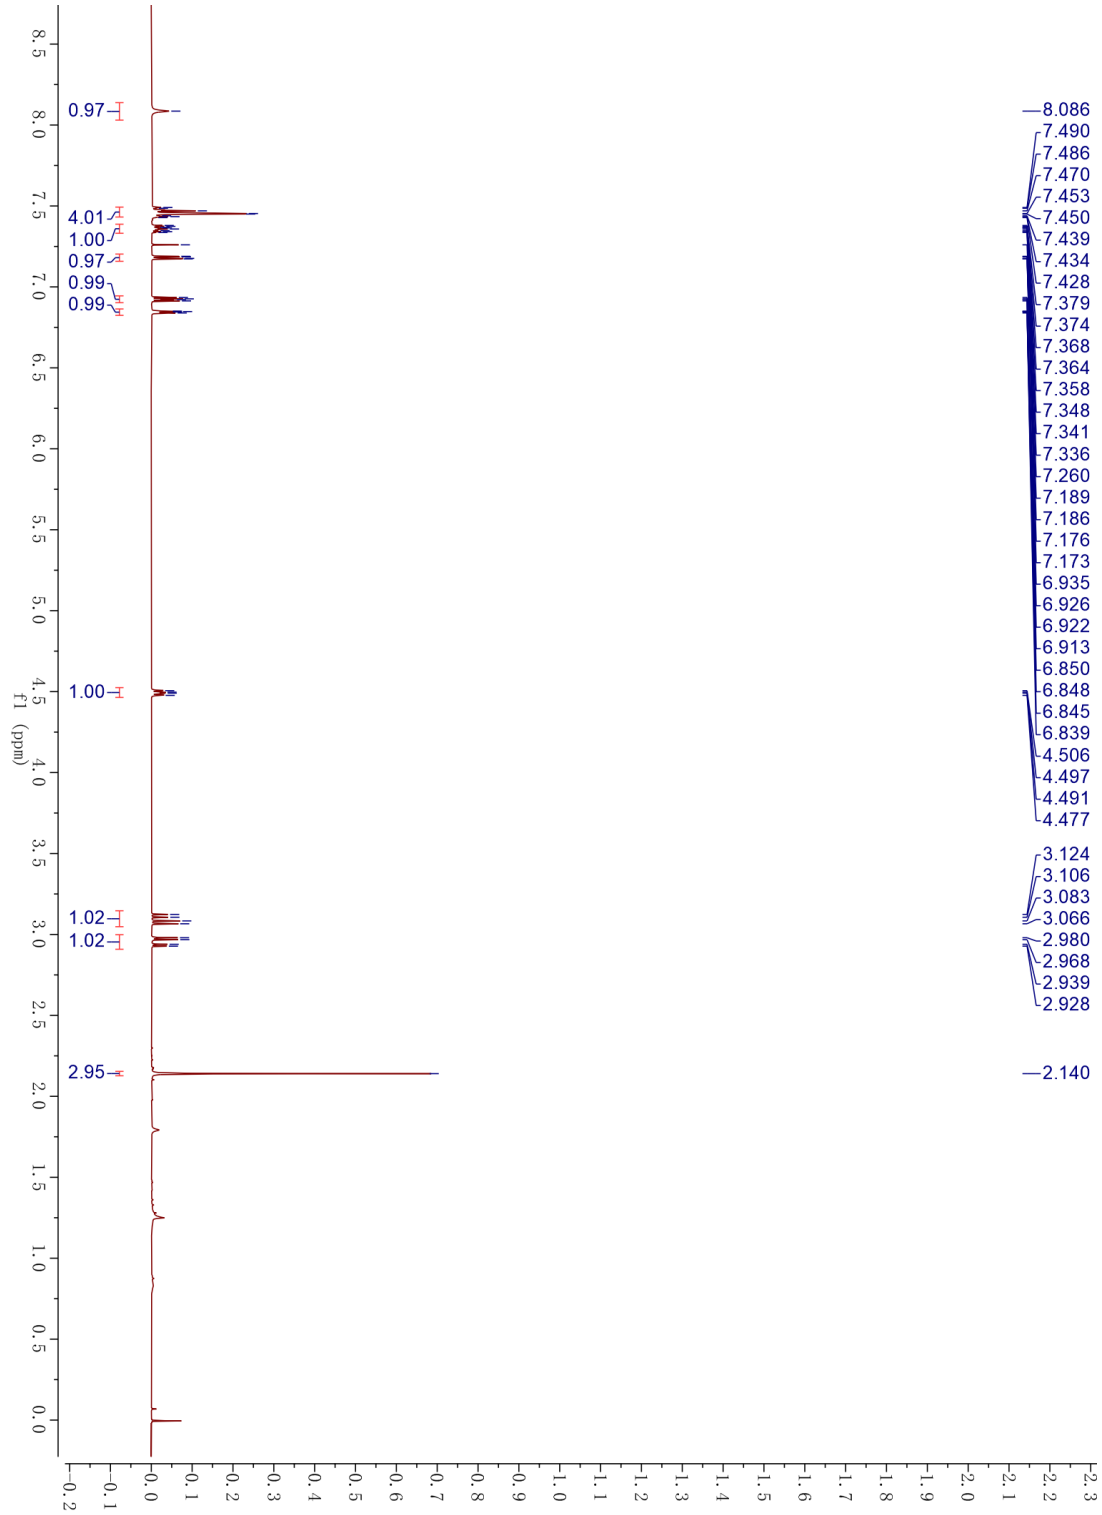

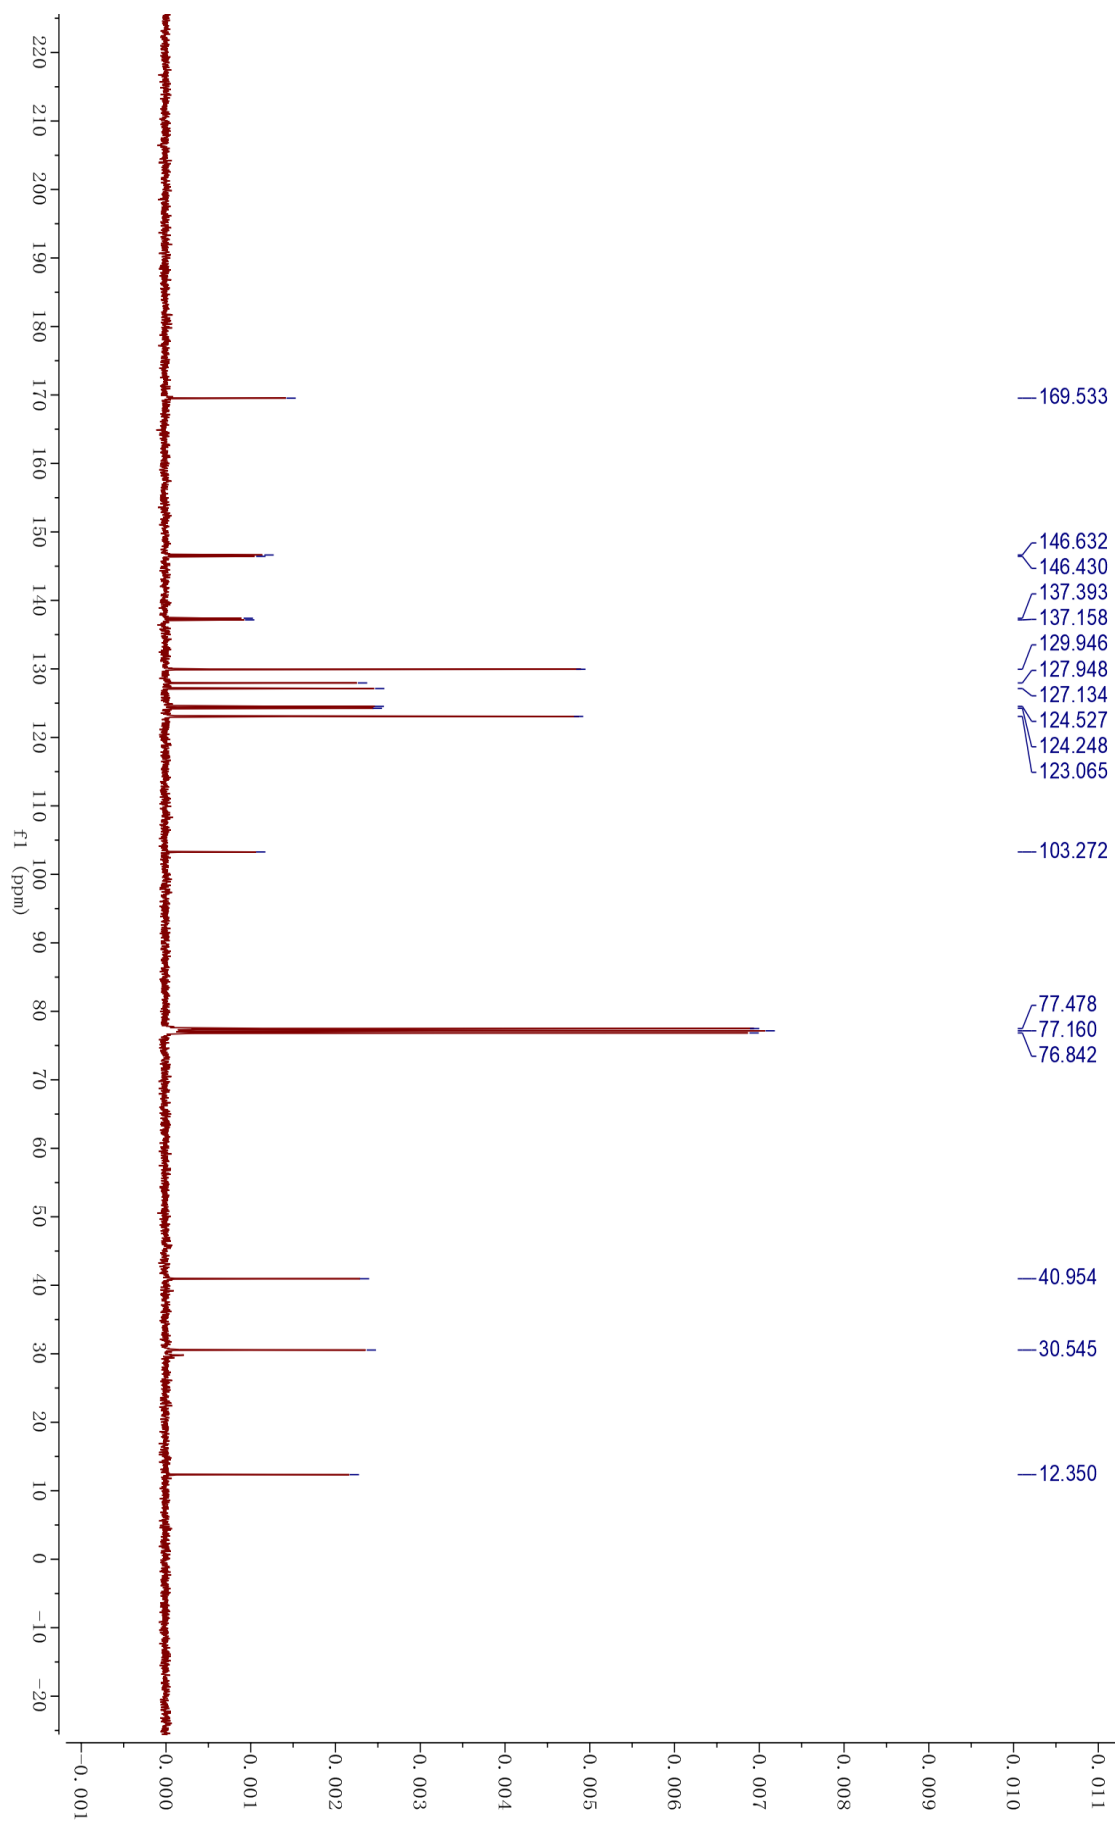

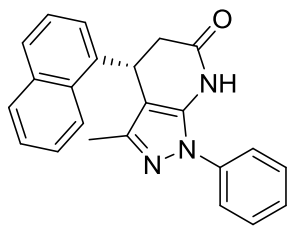

**3n**

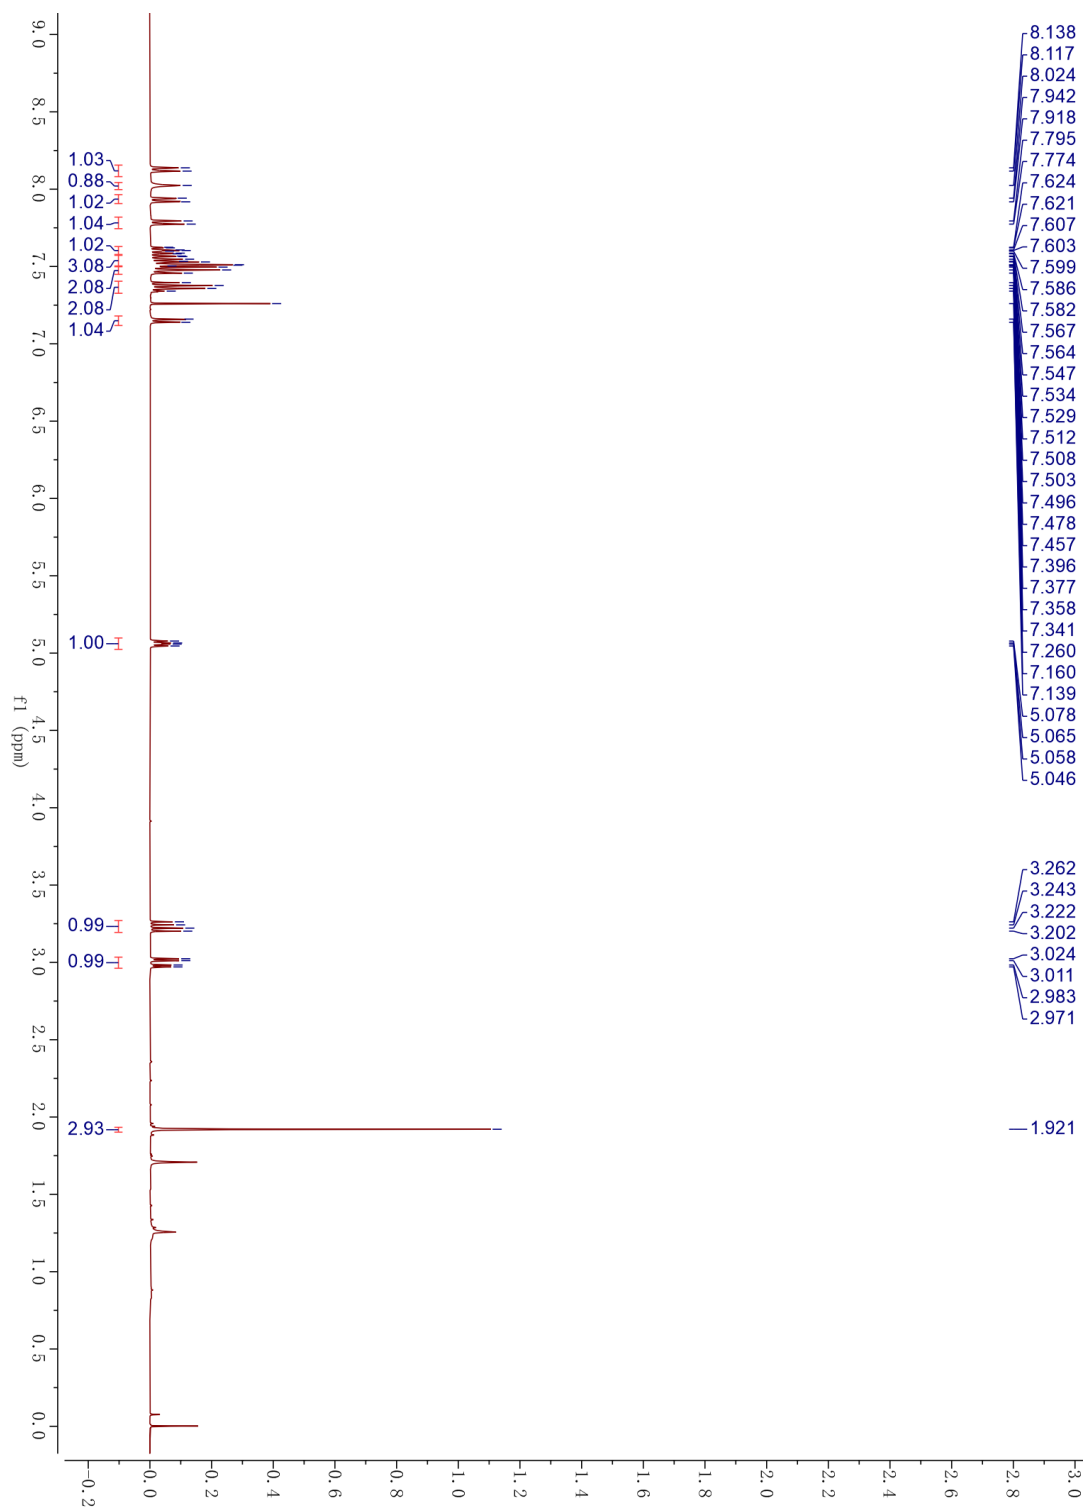

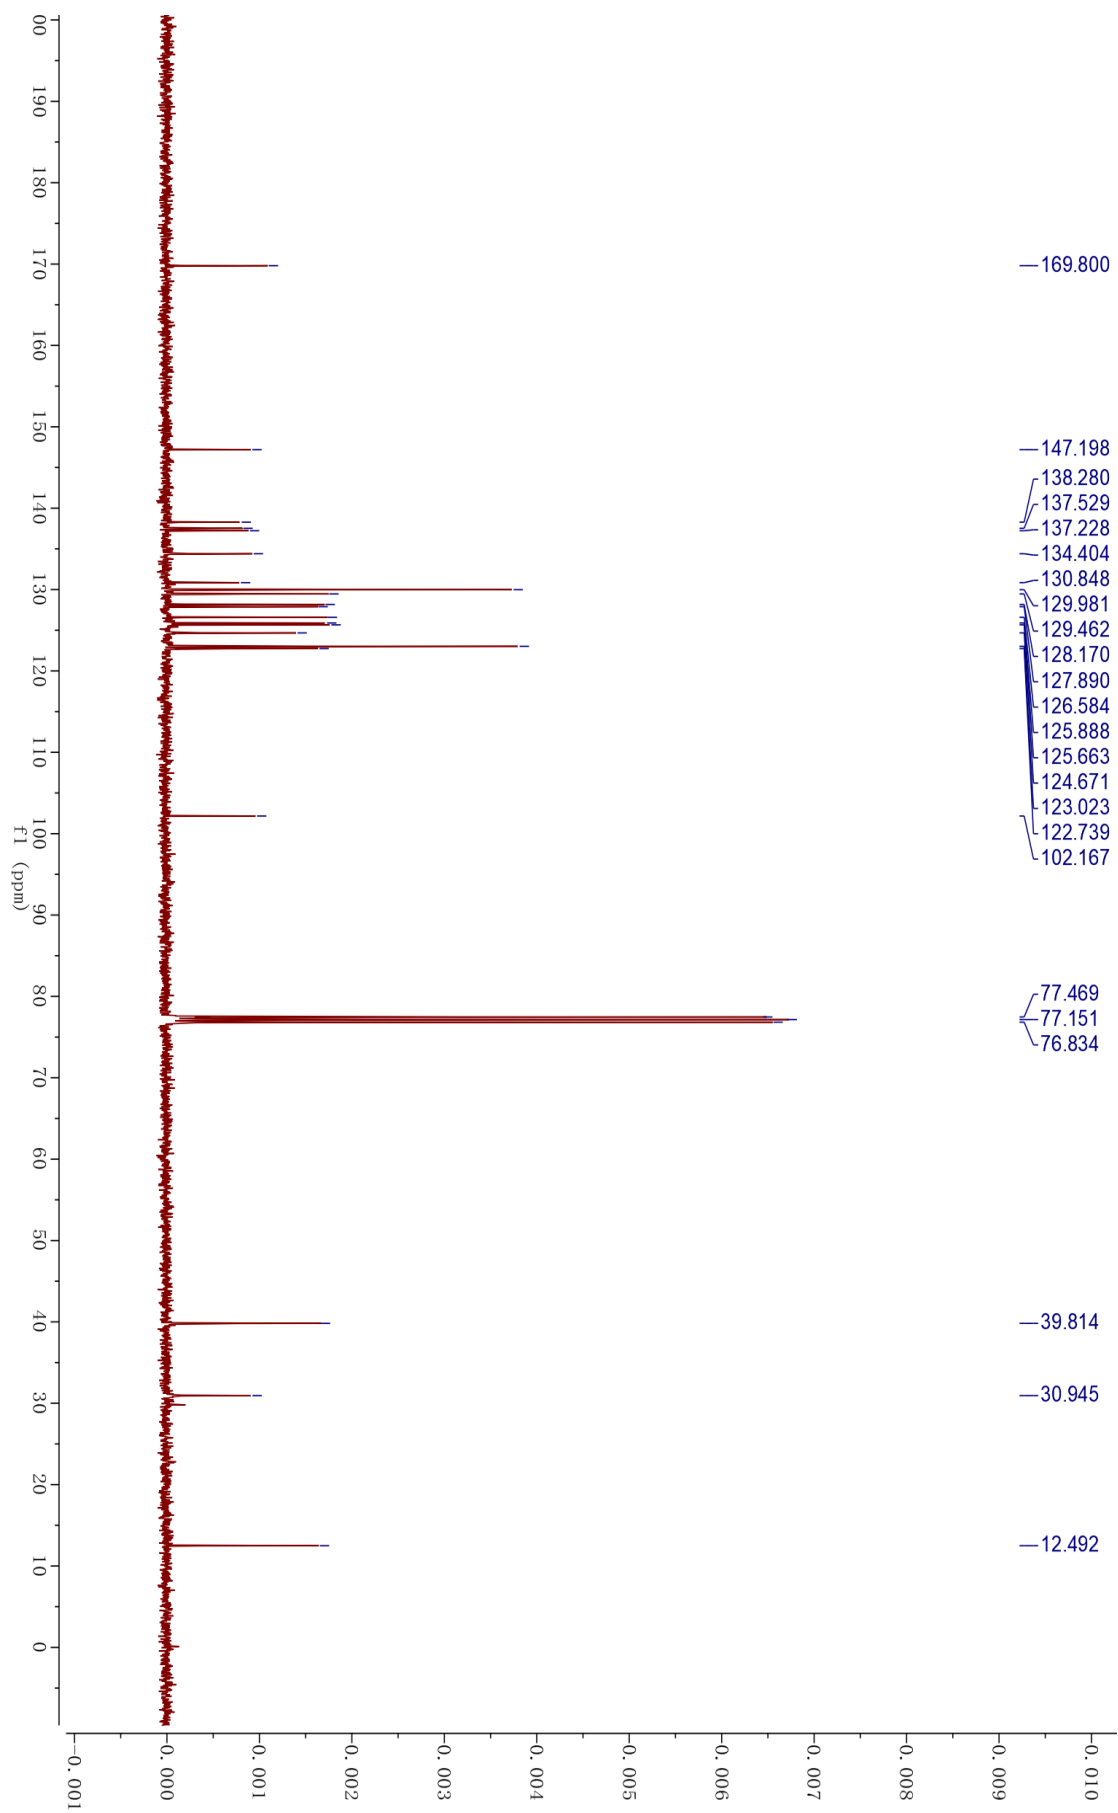

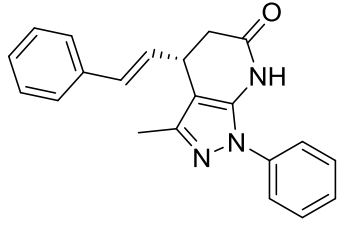

30

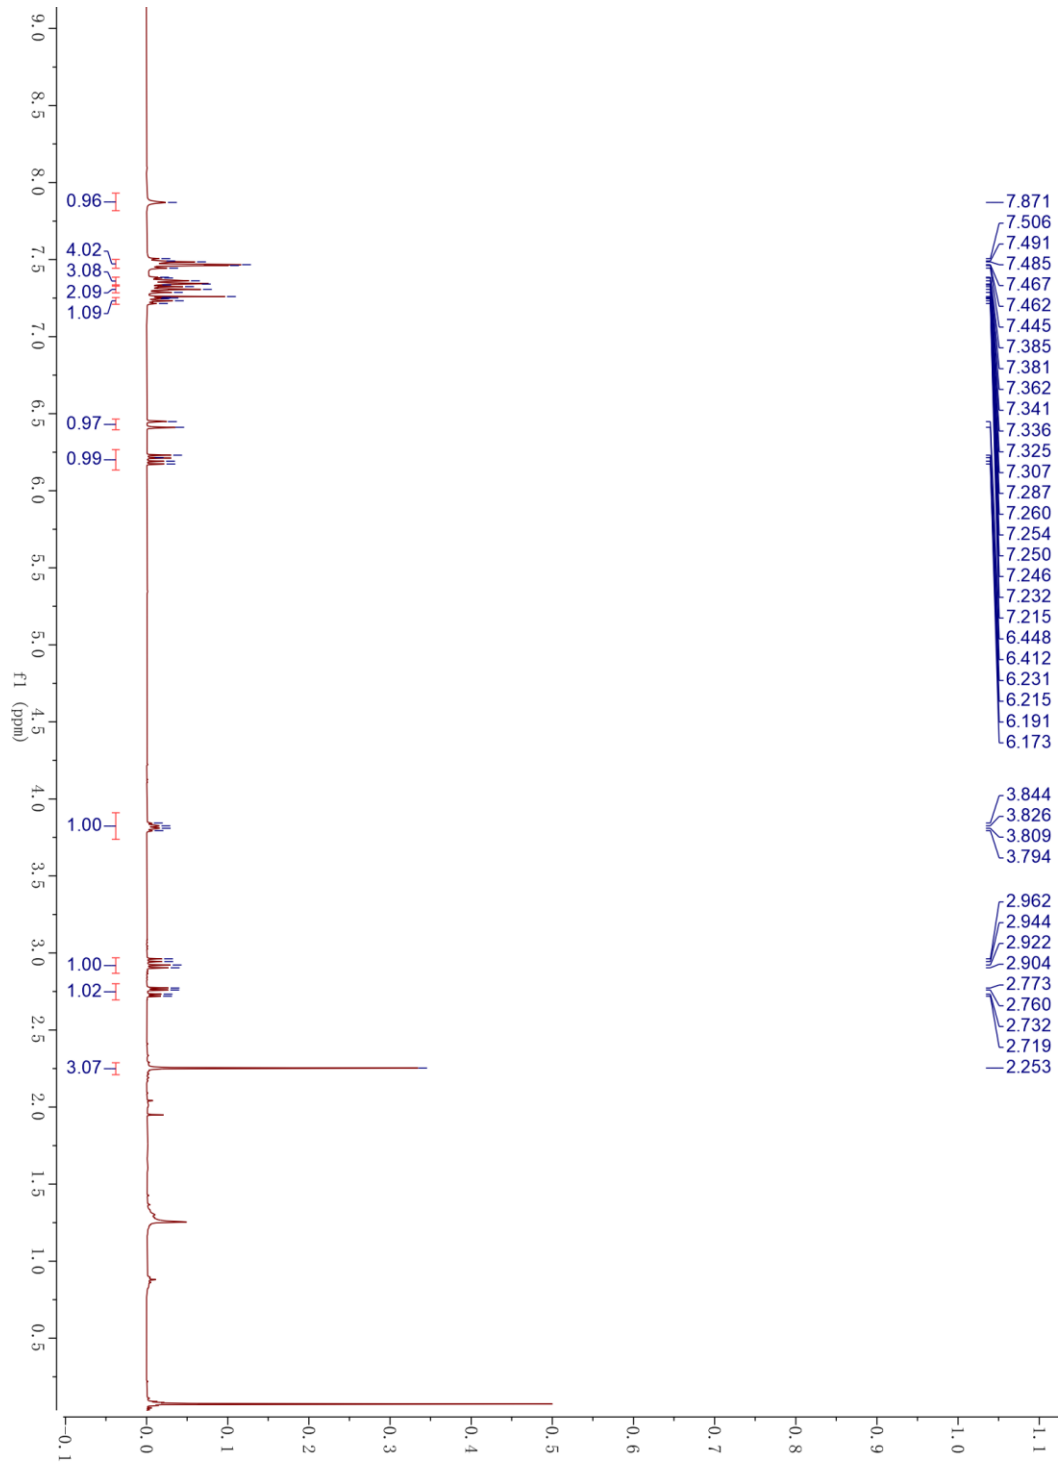

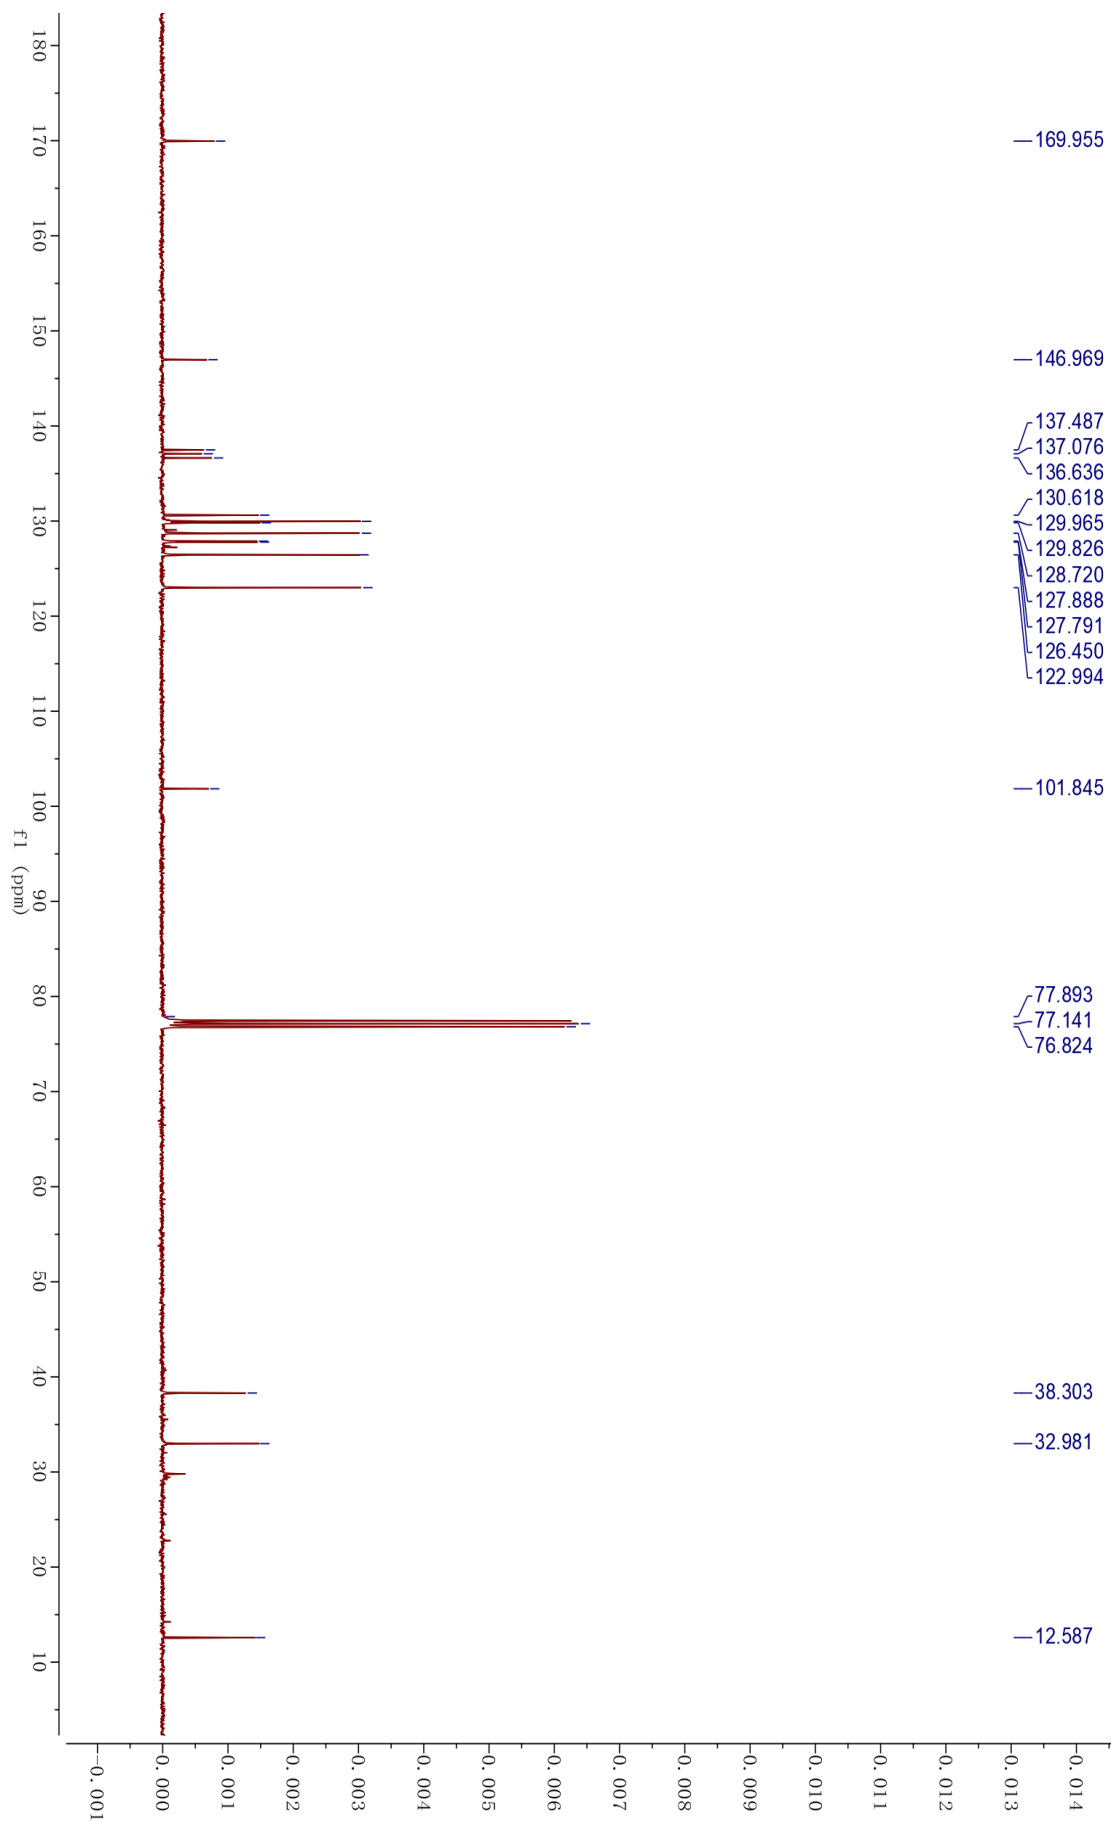



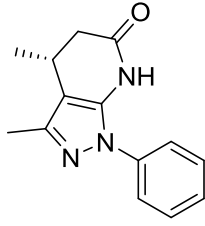

**3p**

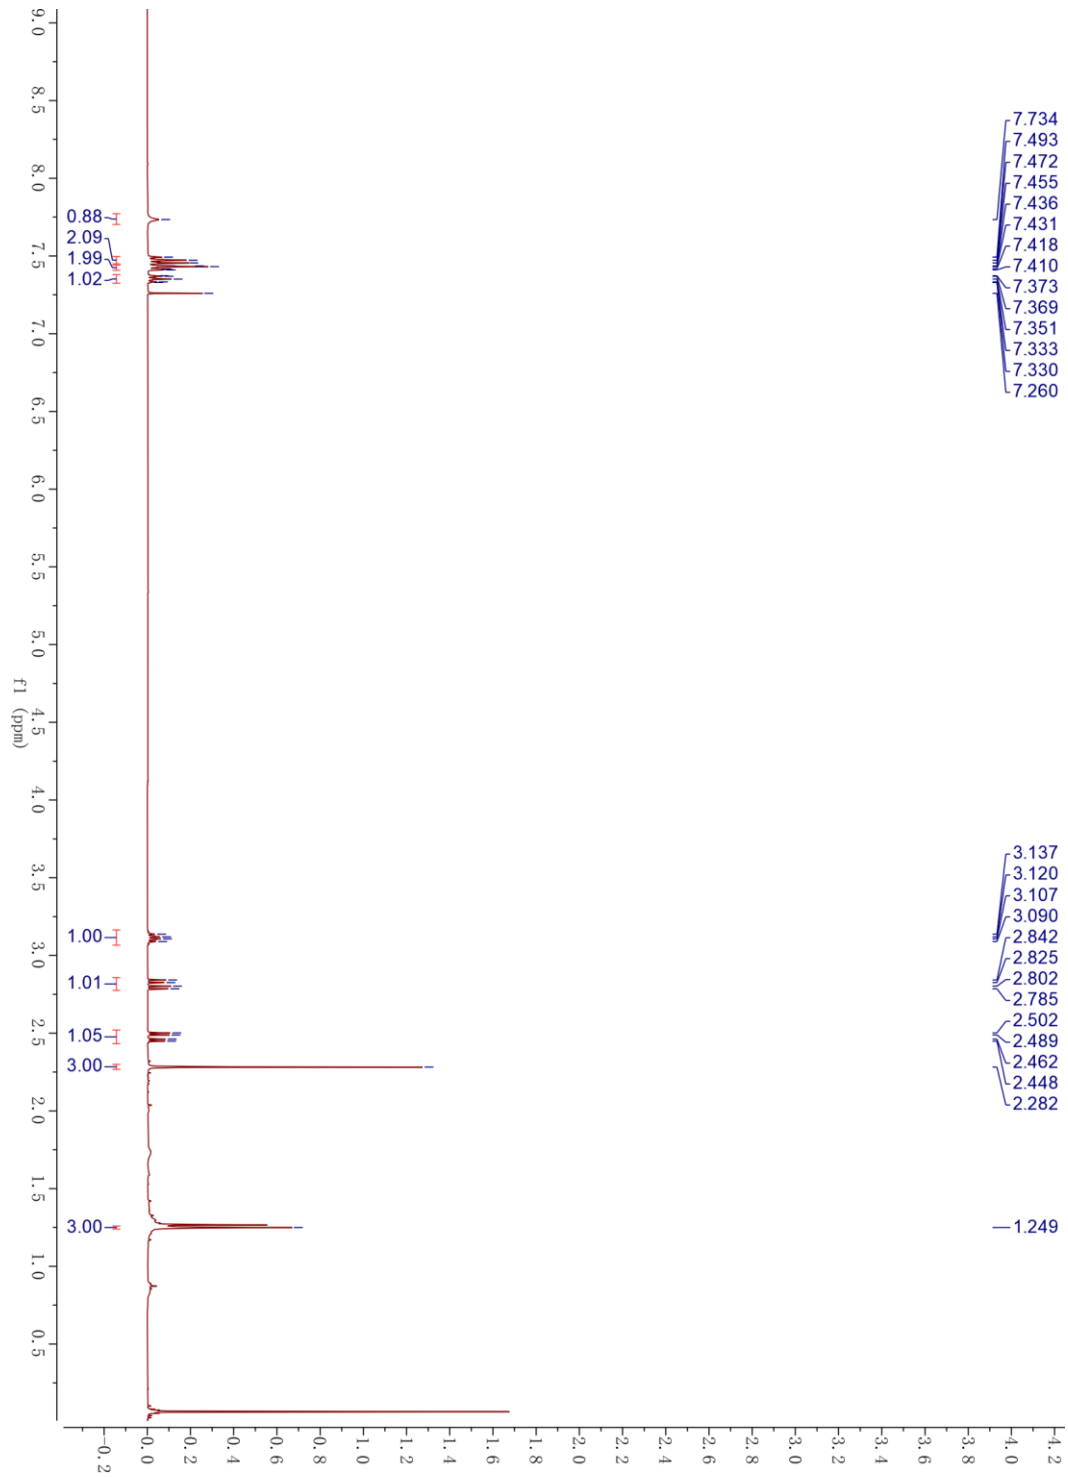

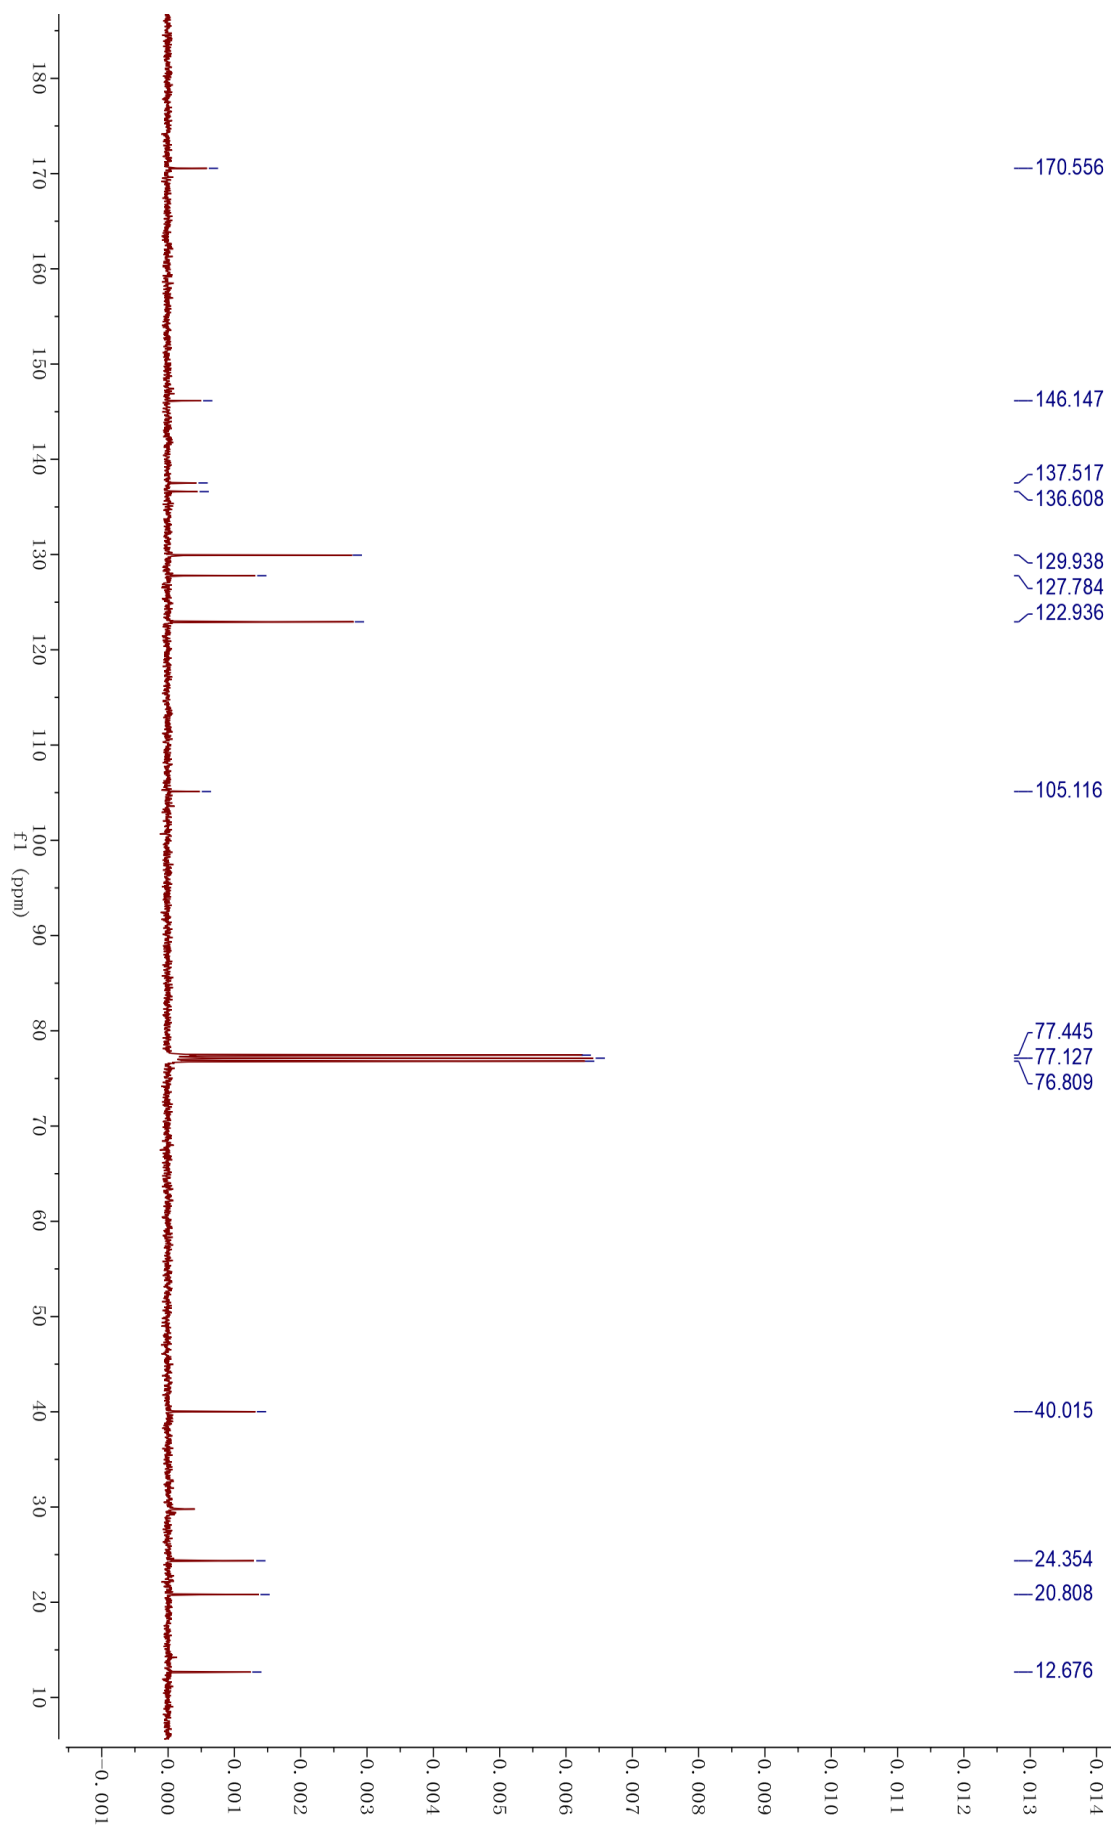

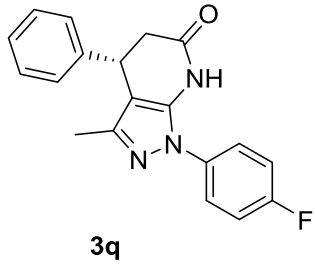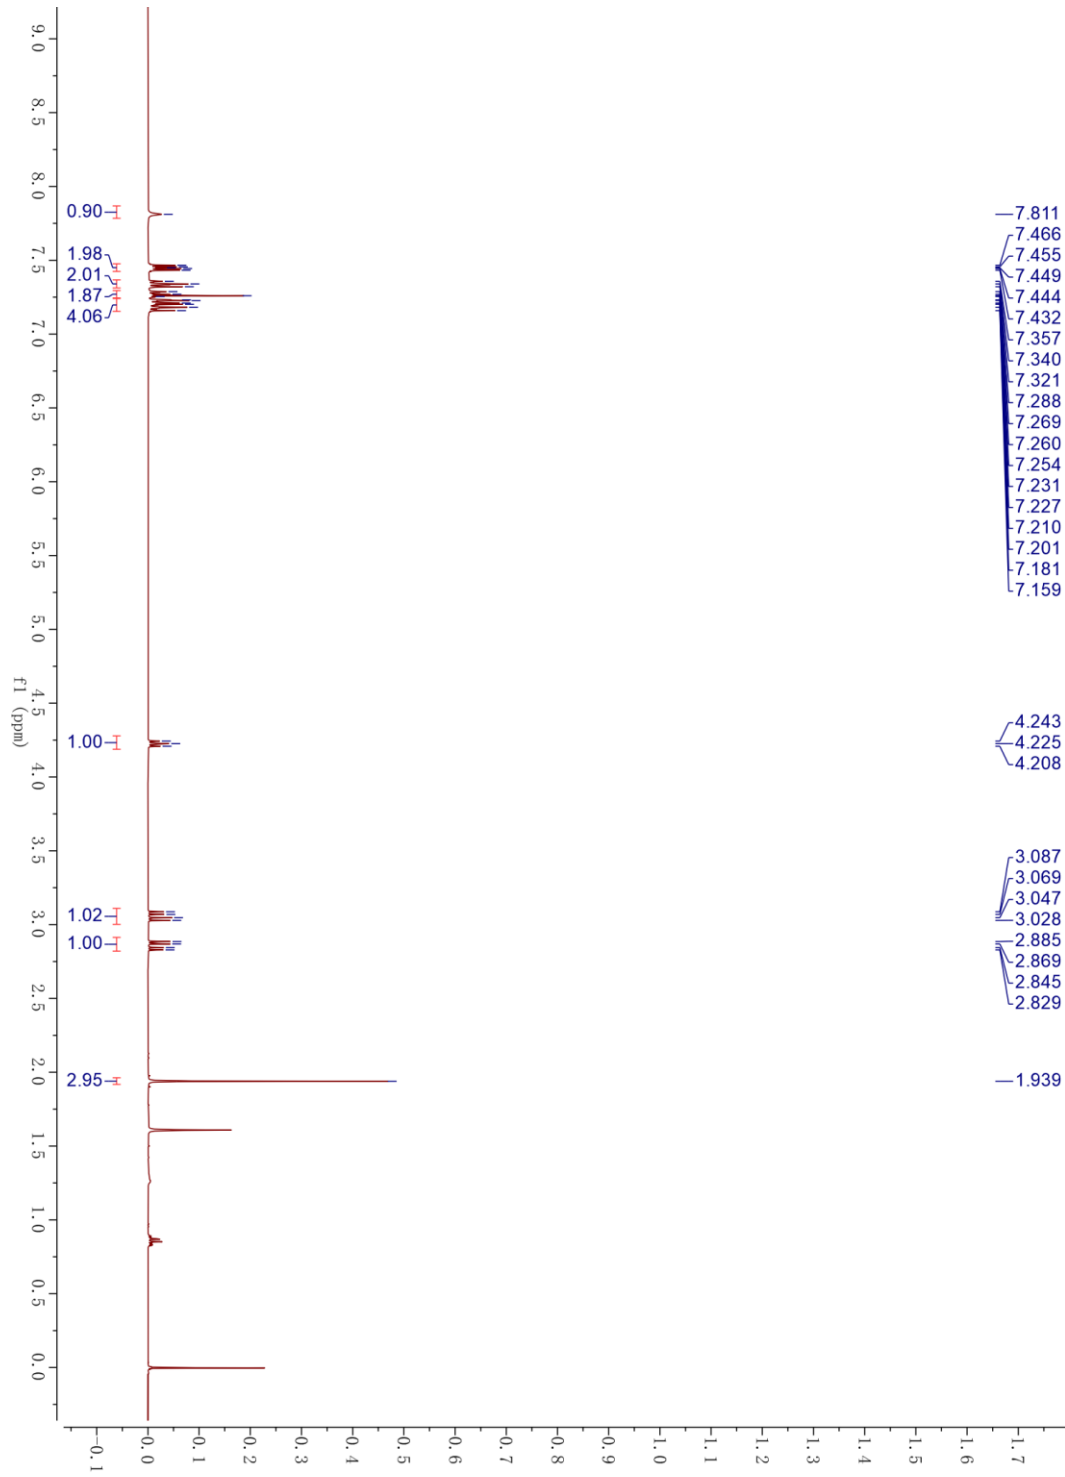

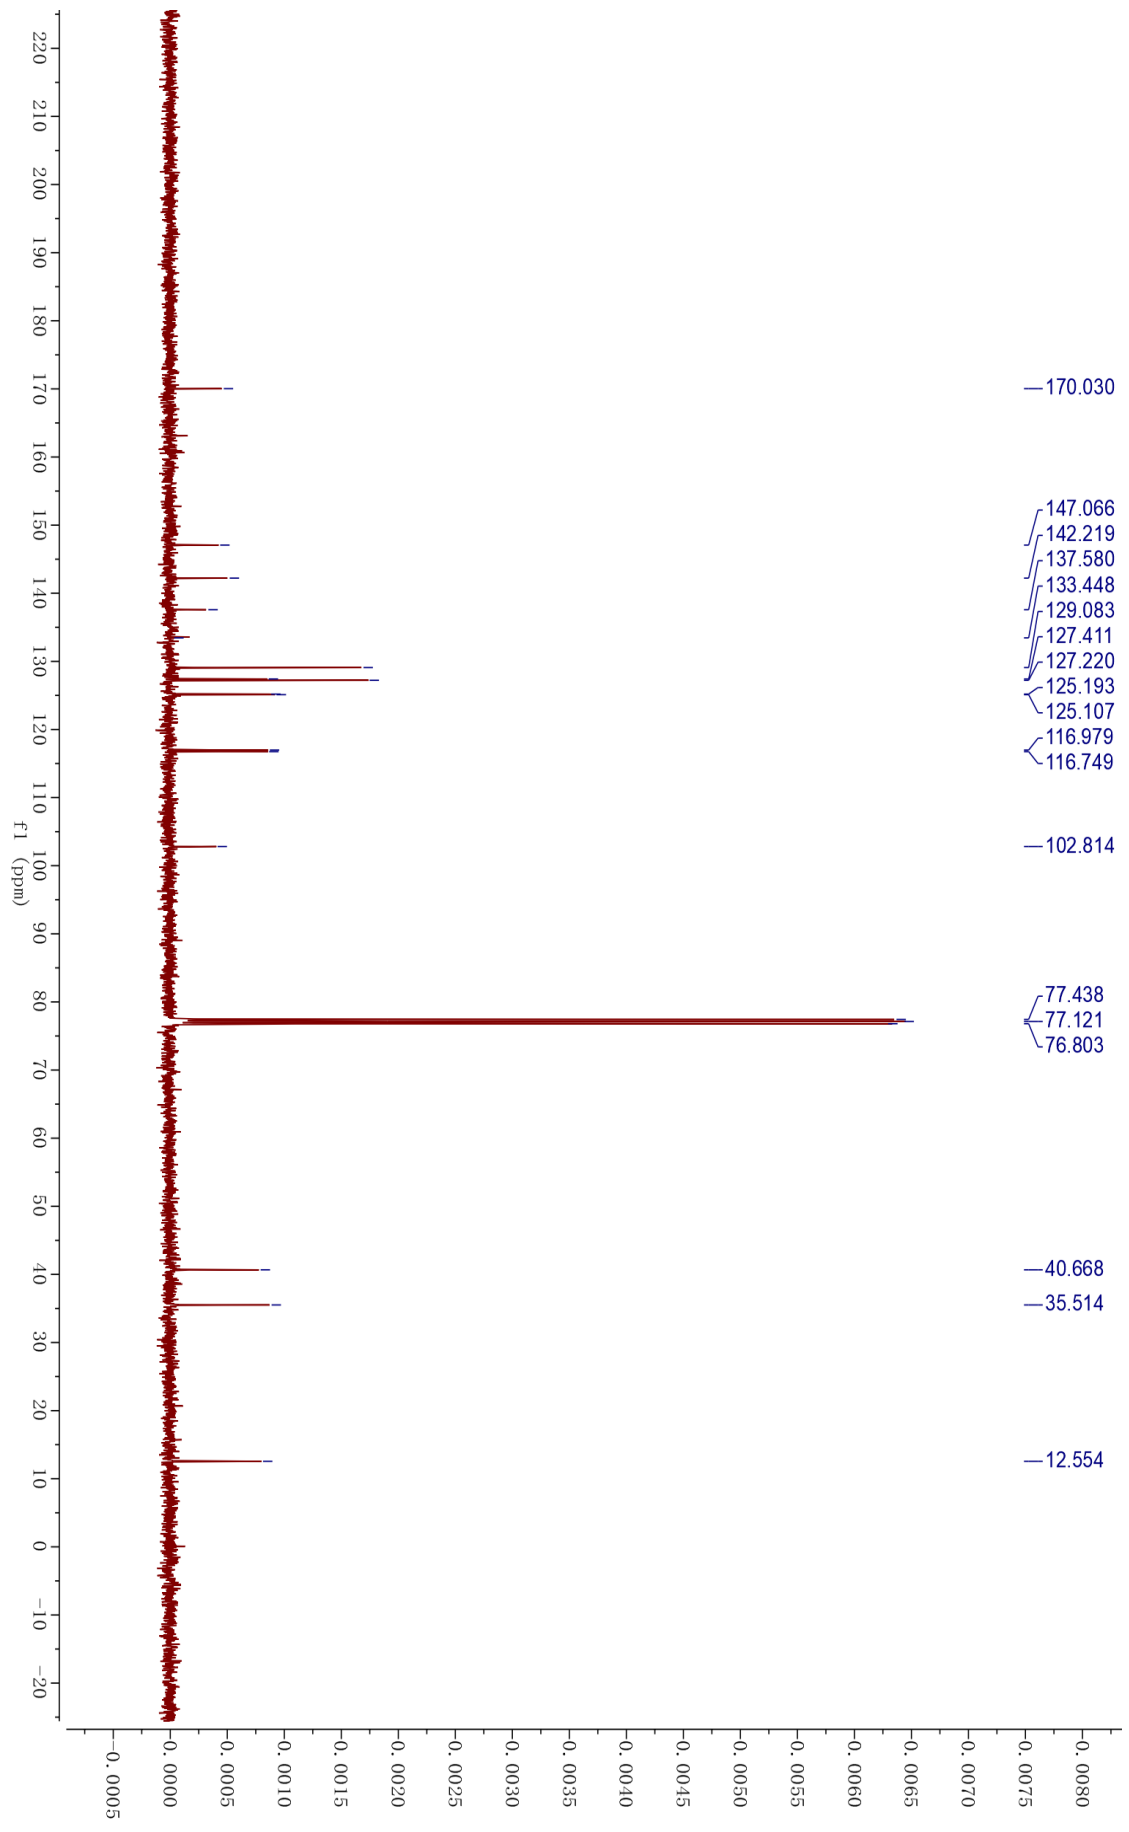

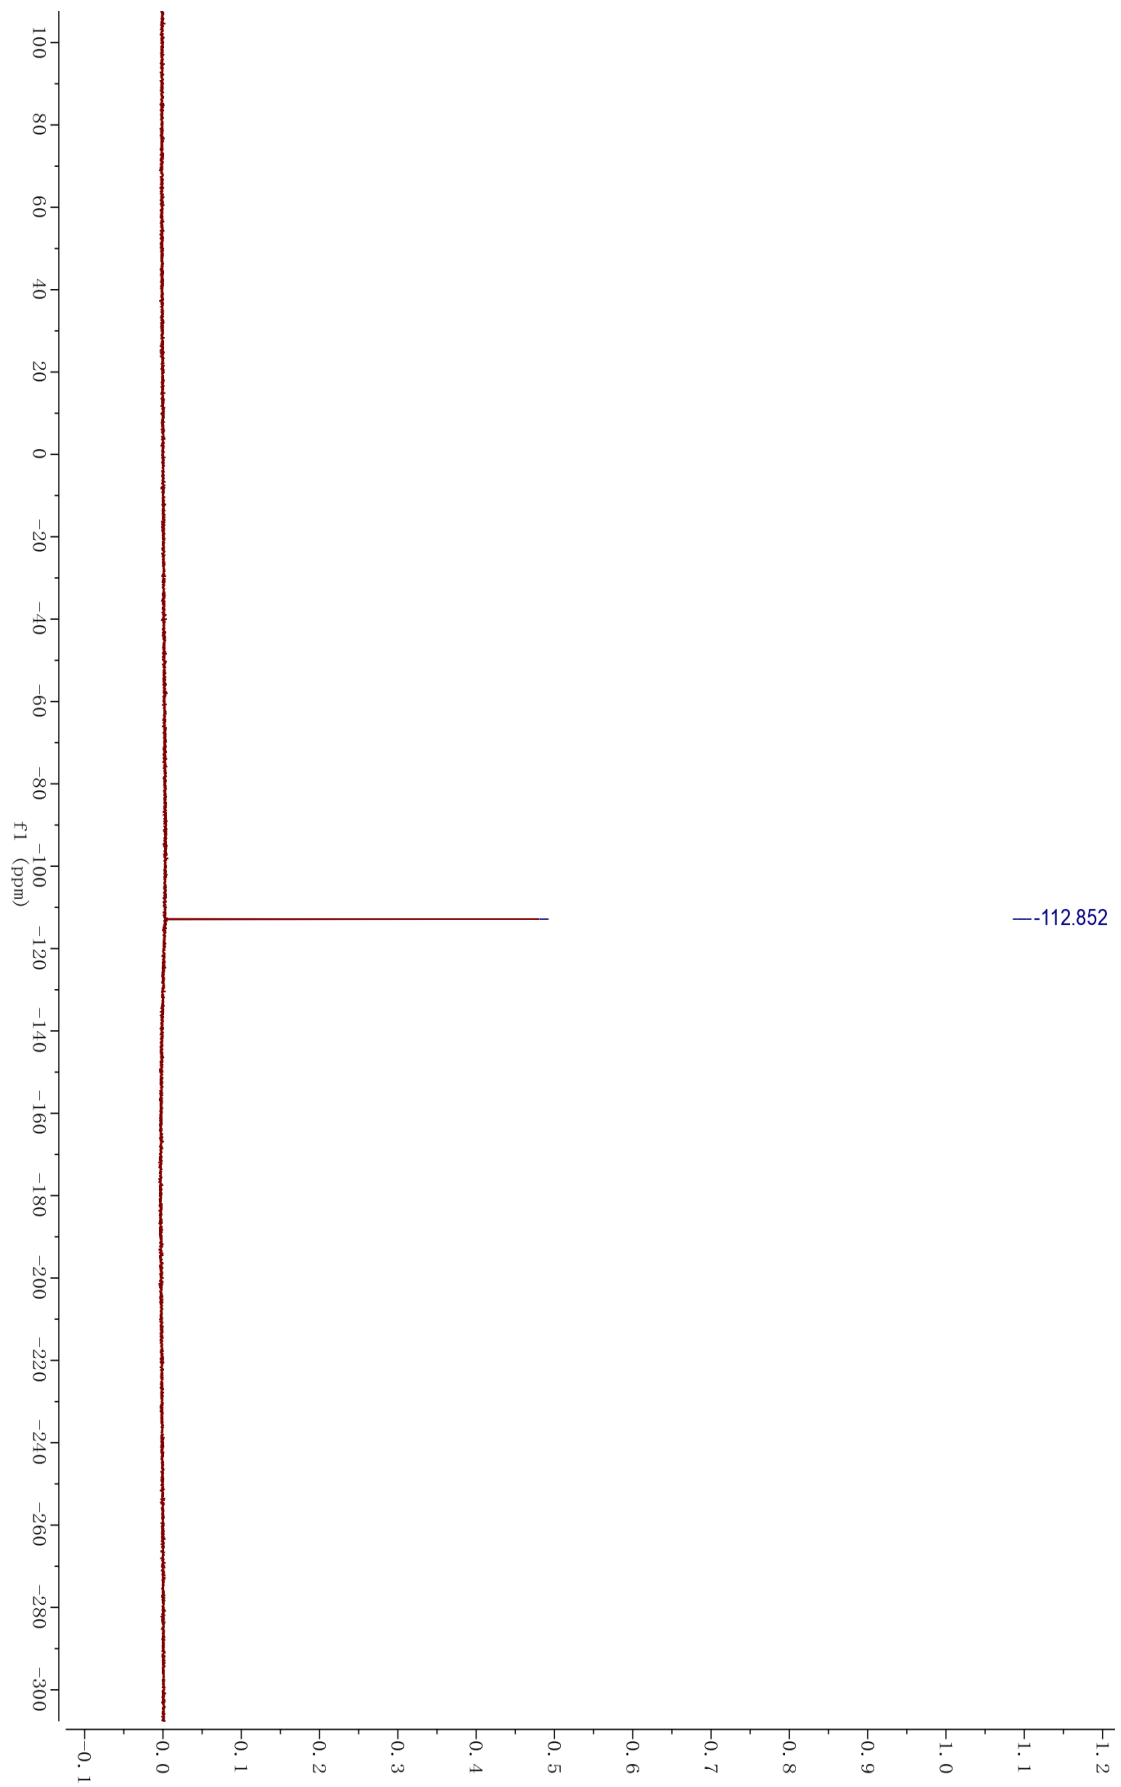

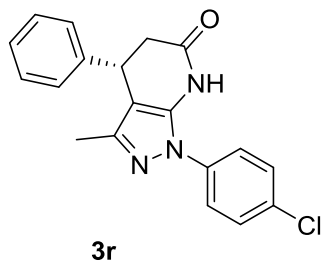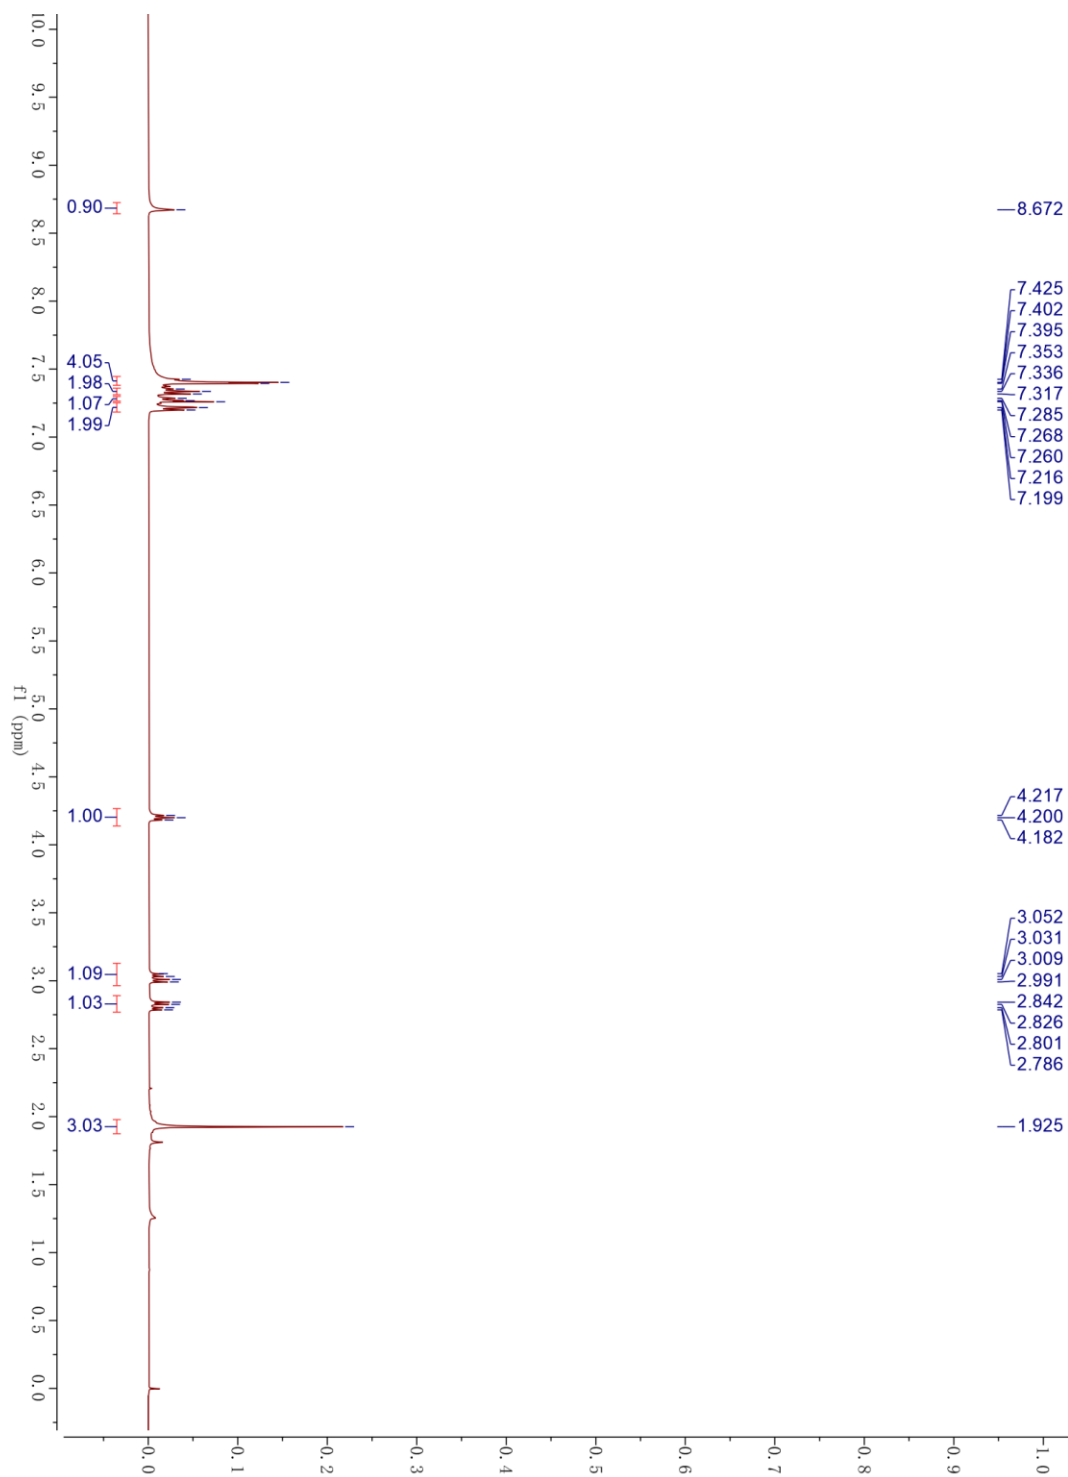

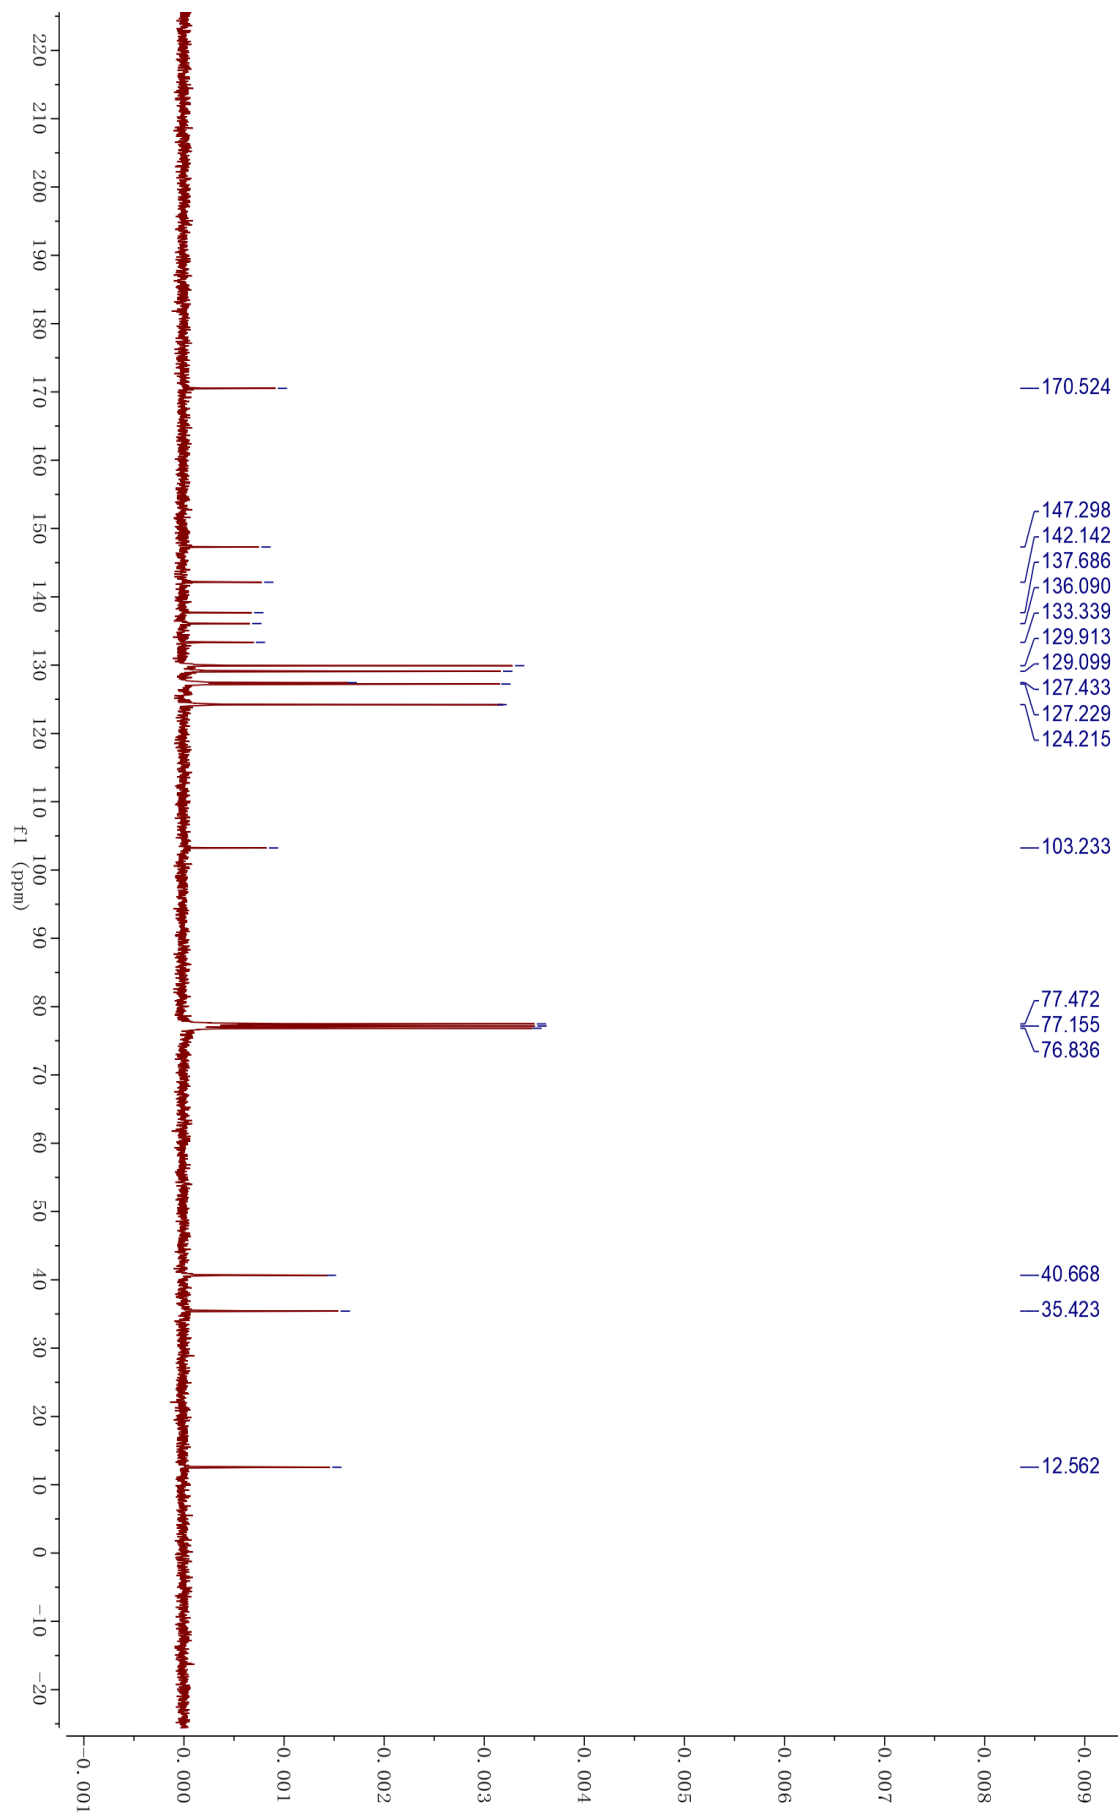

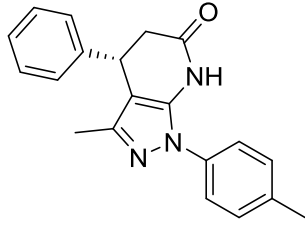

3s

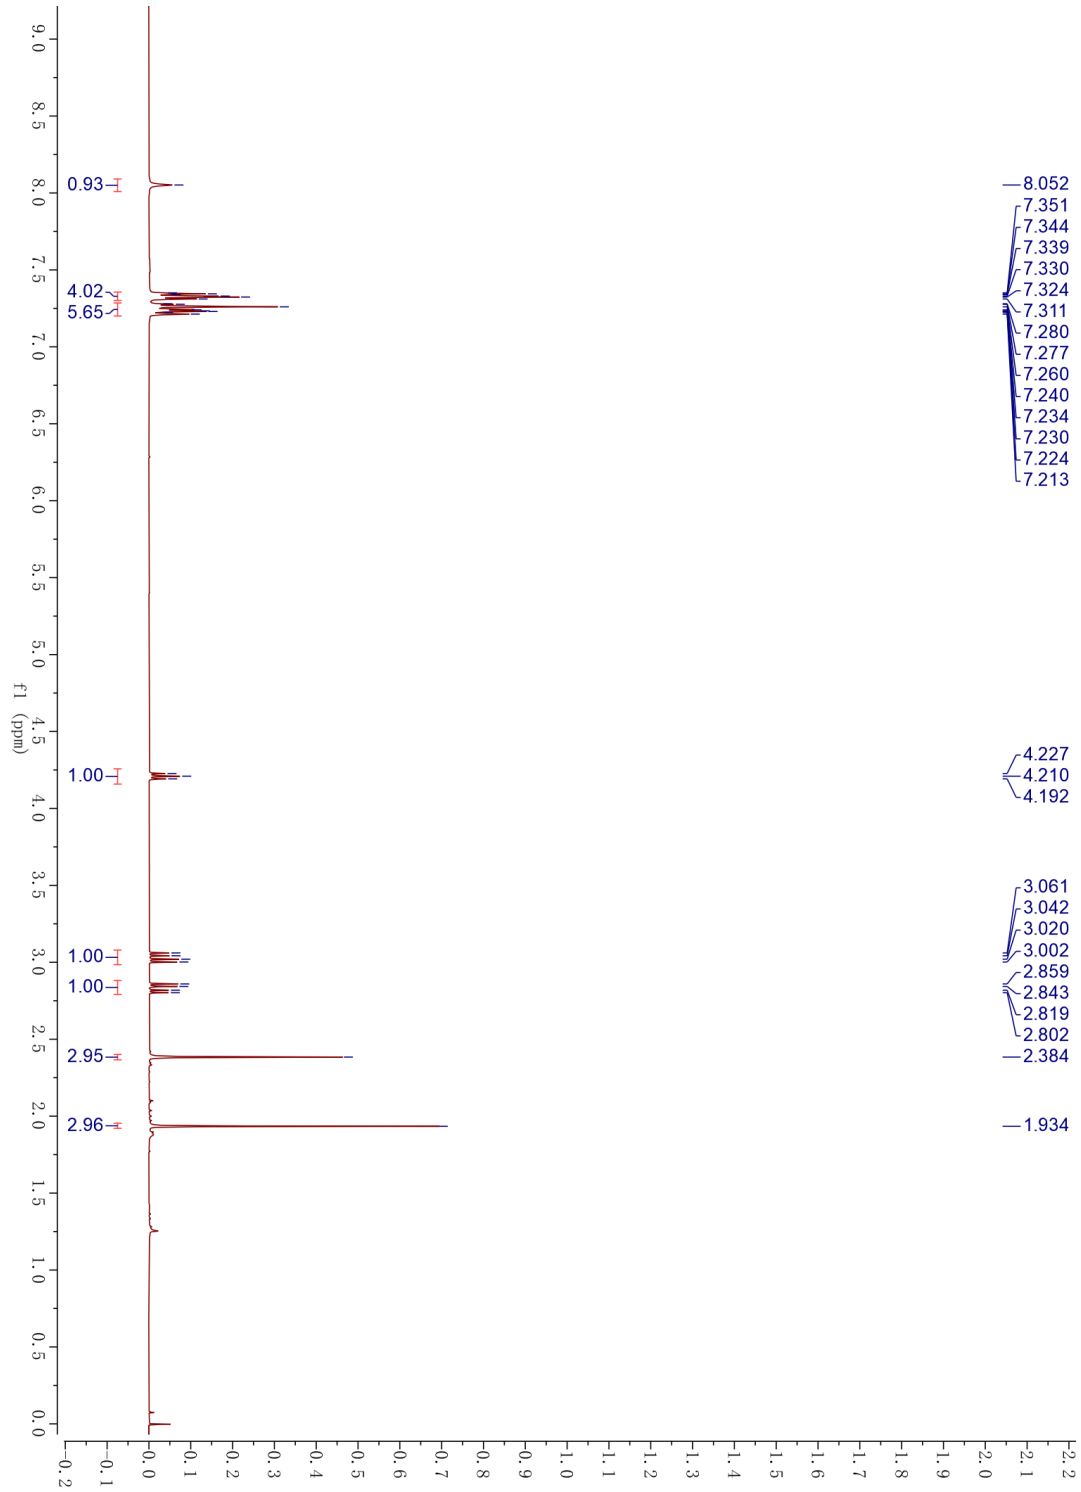



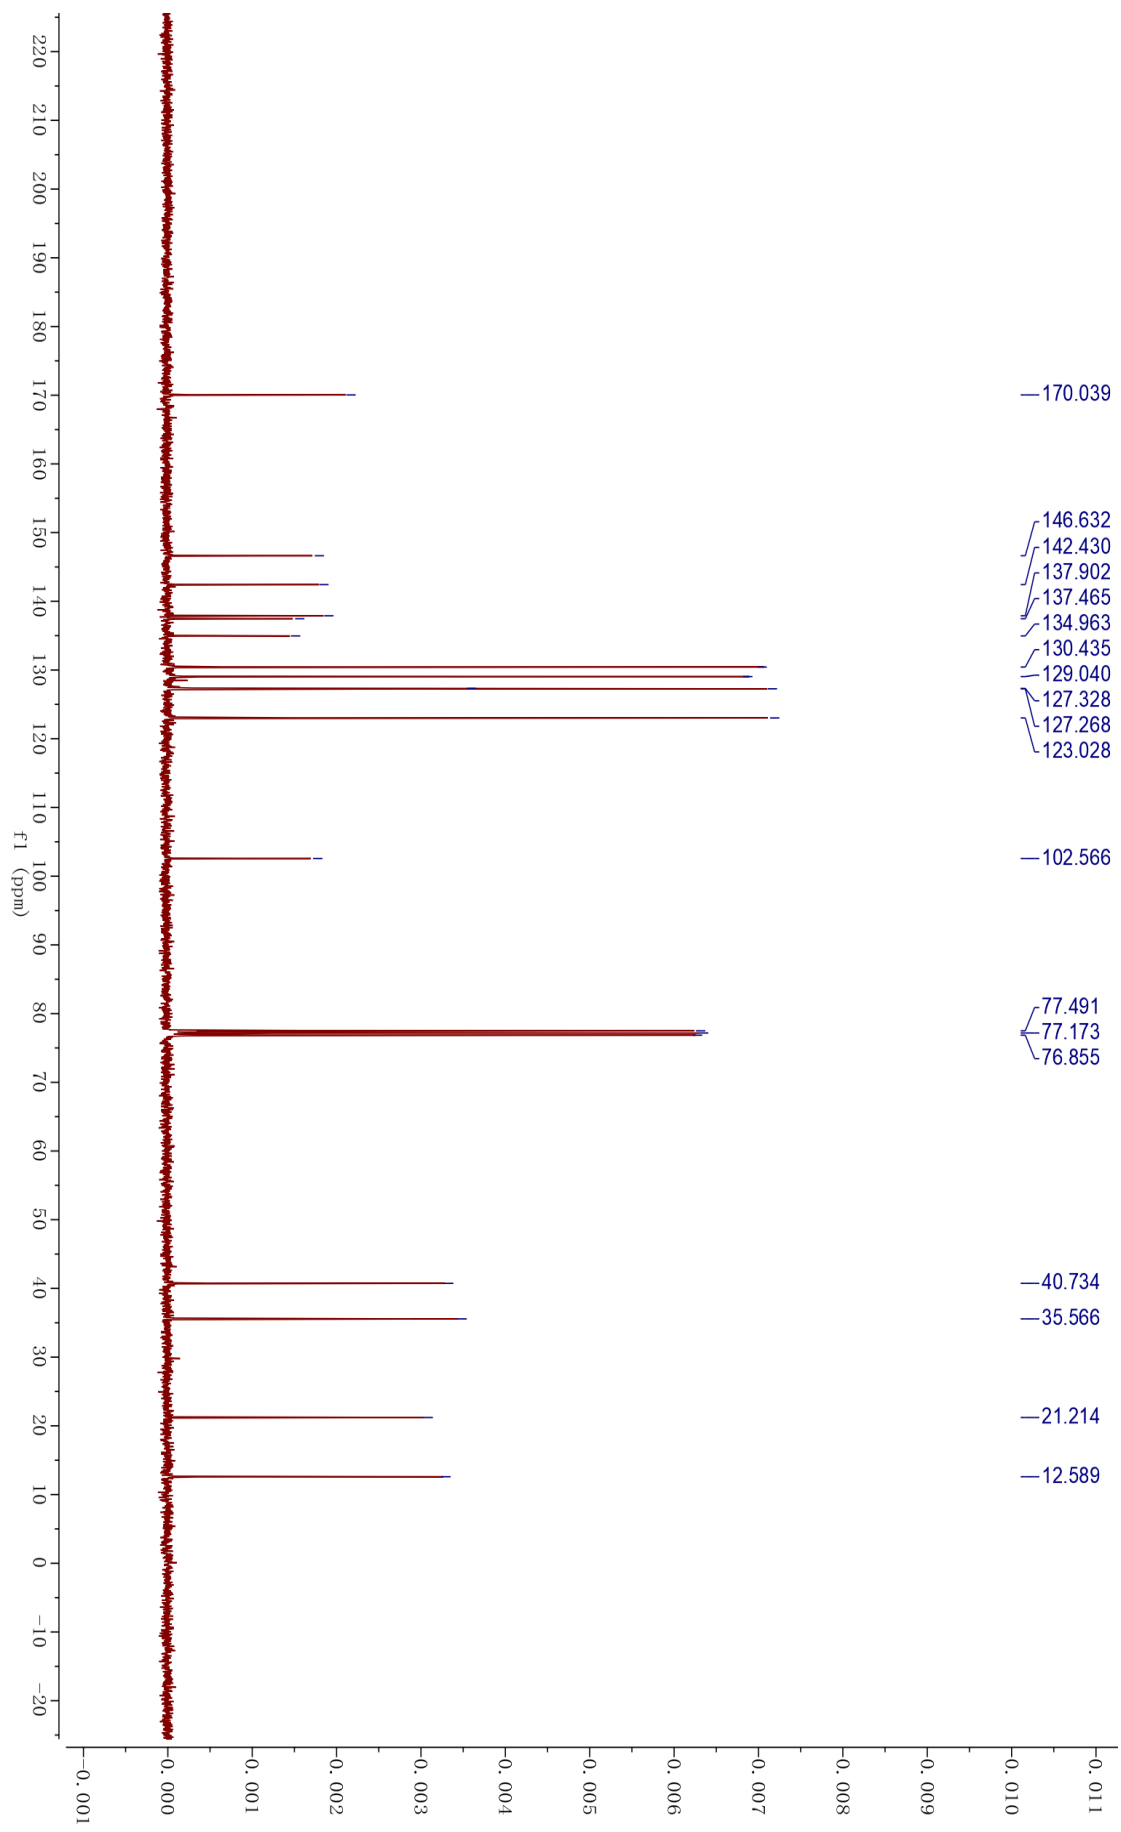

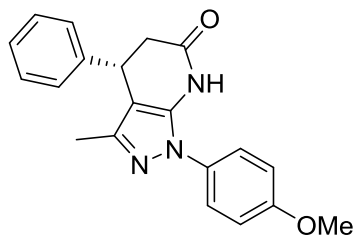

**3t**

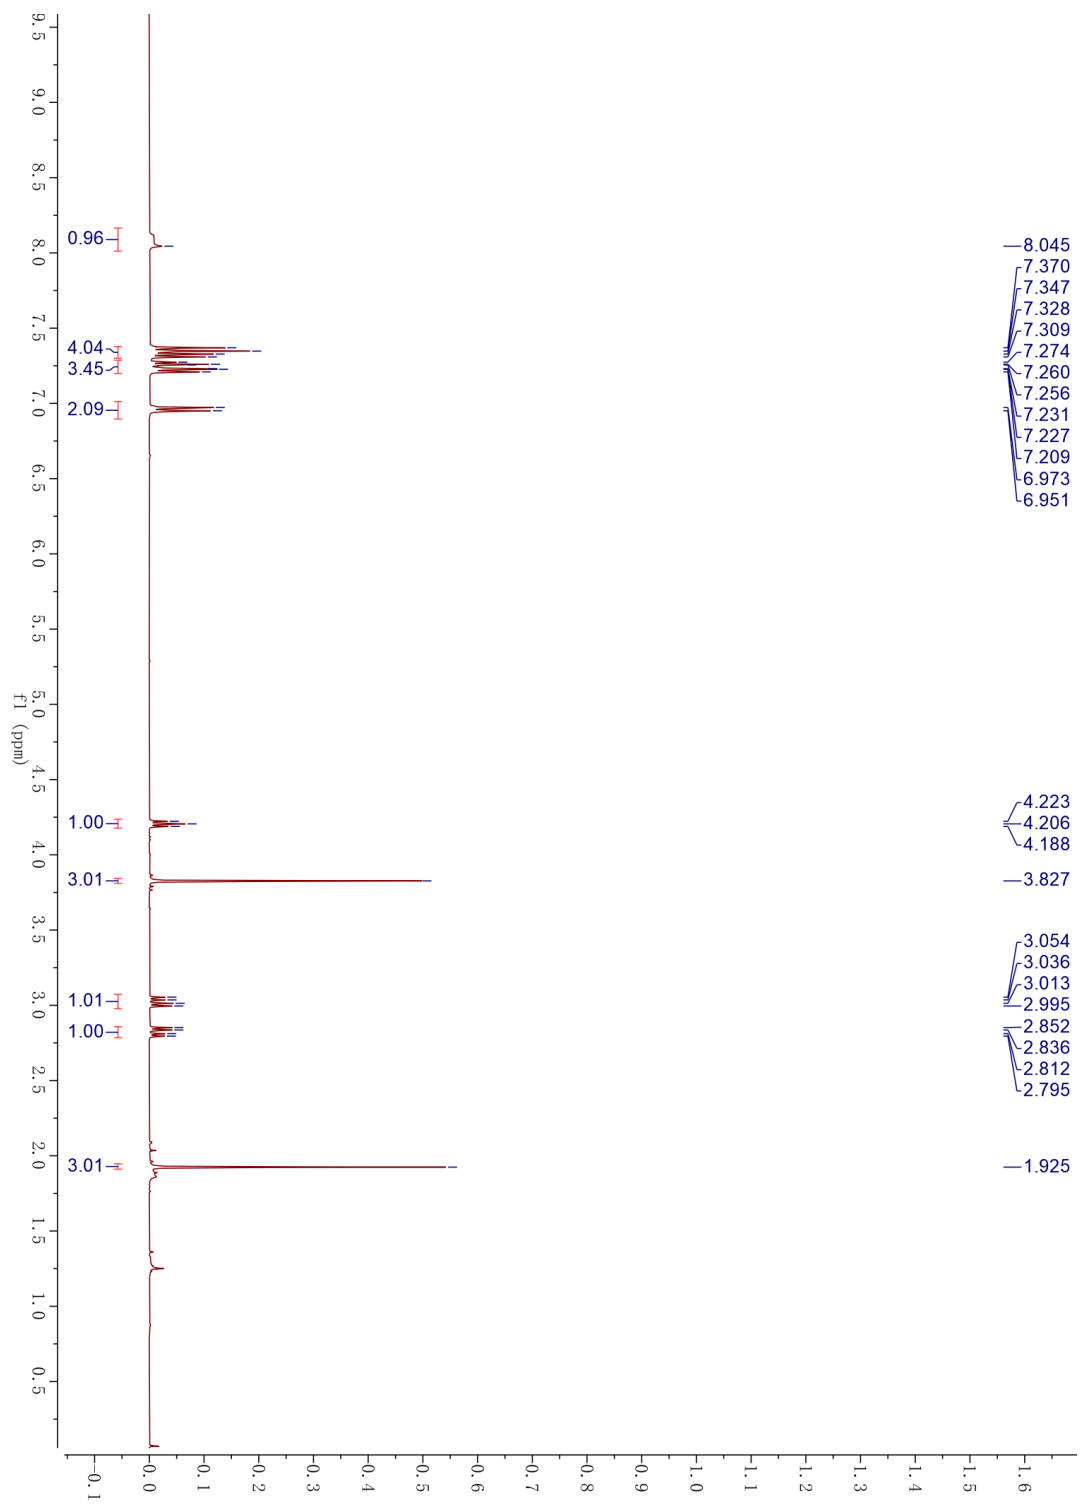

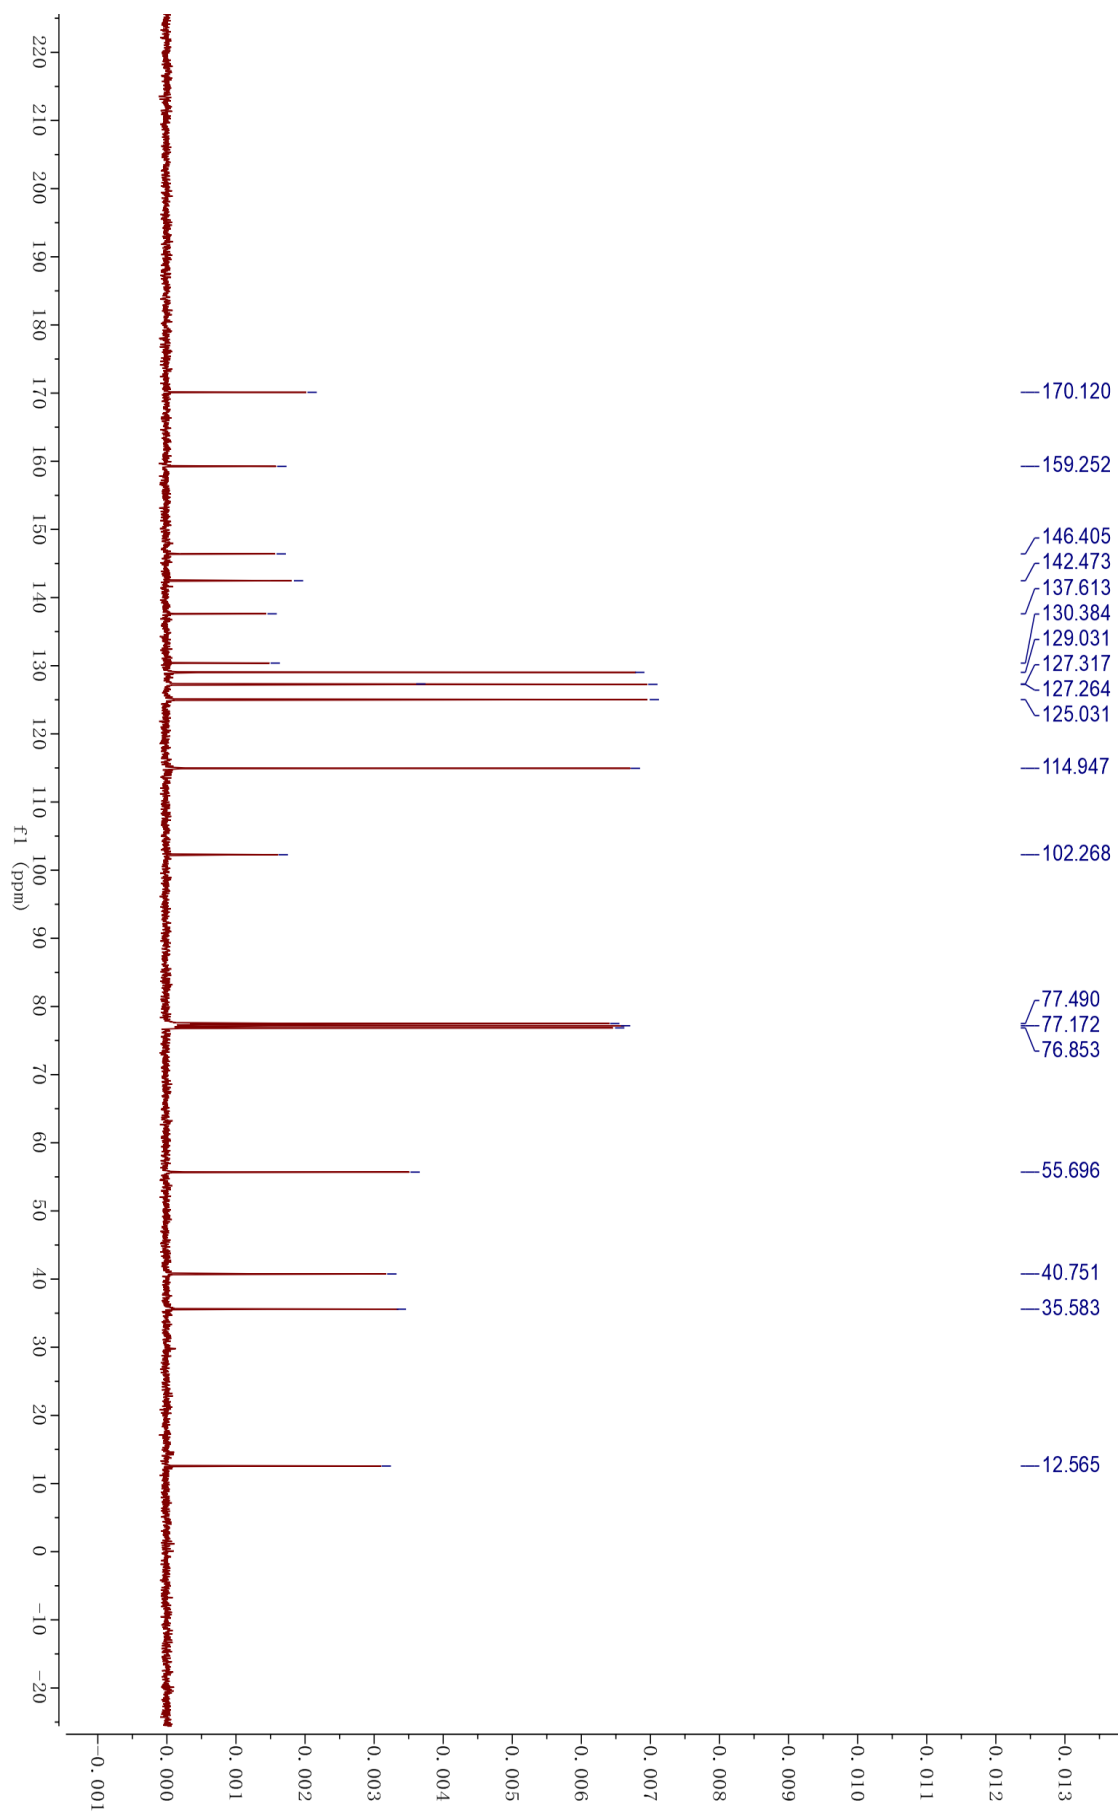

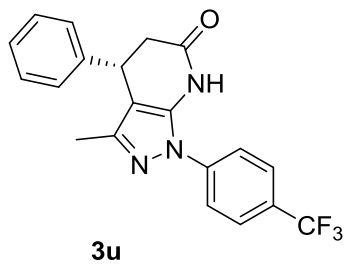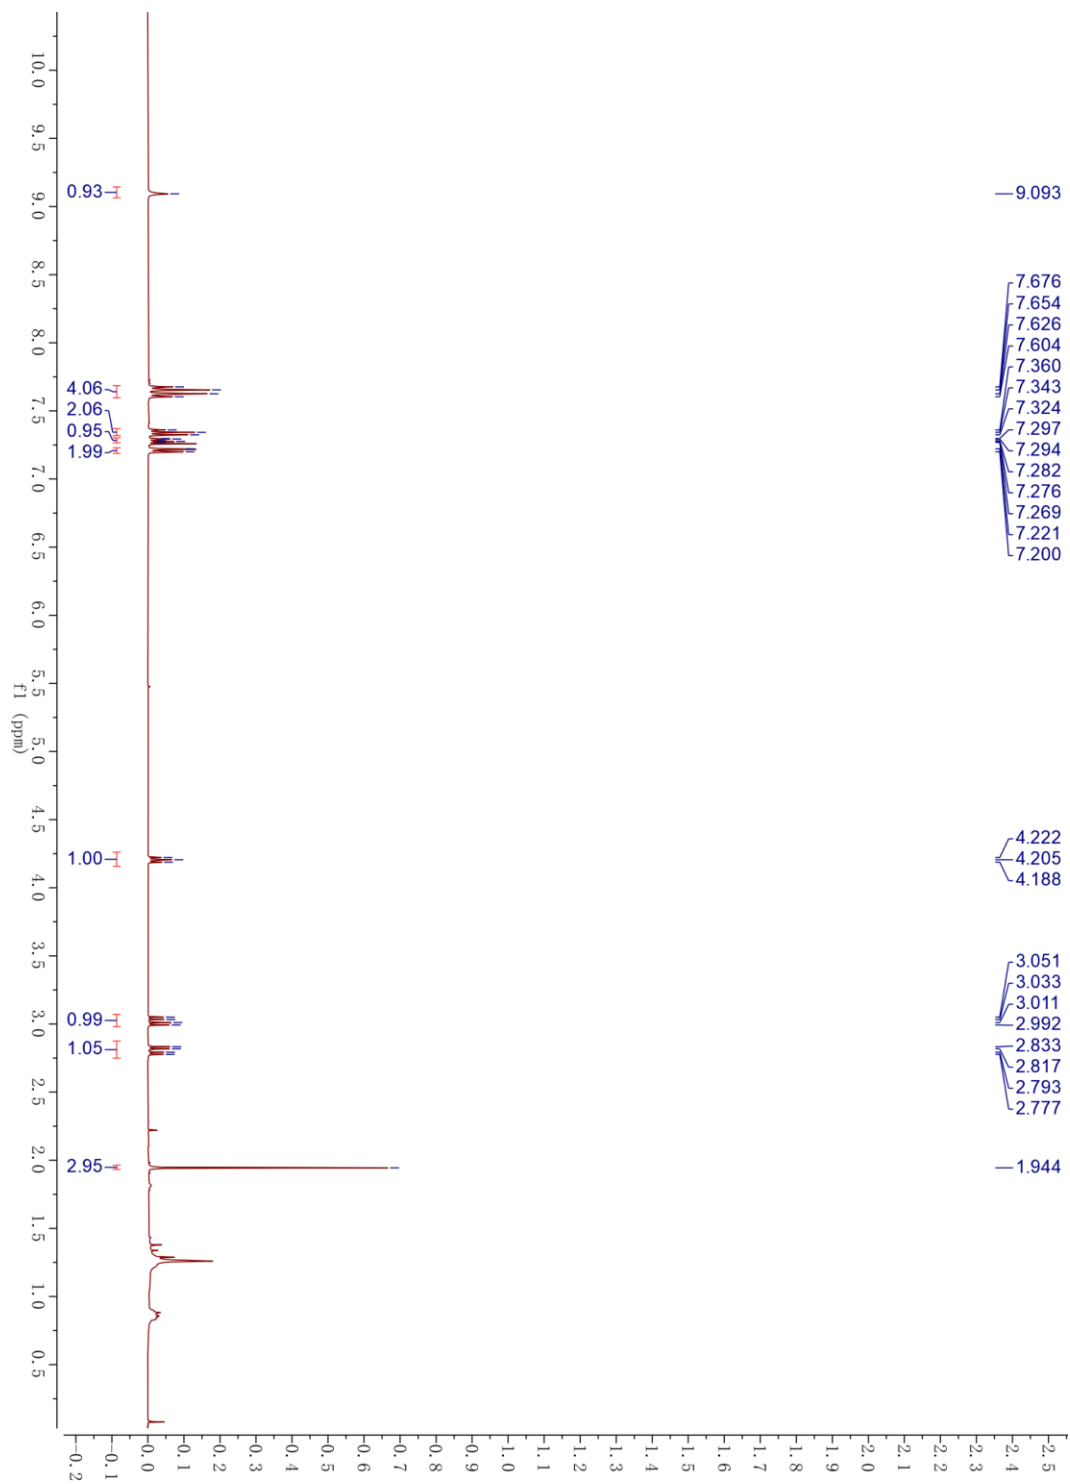

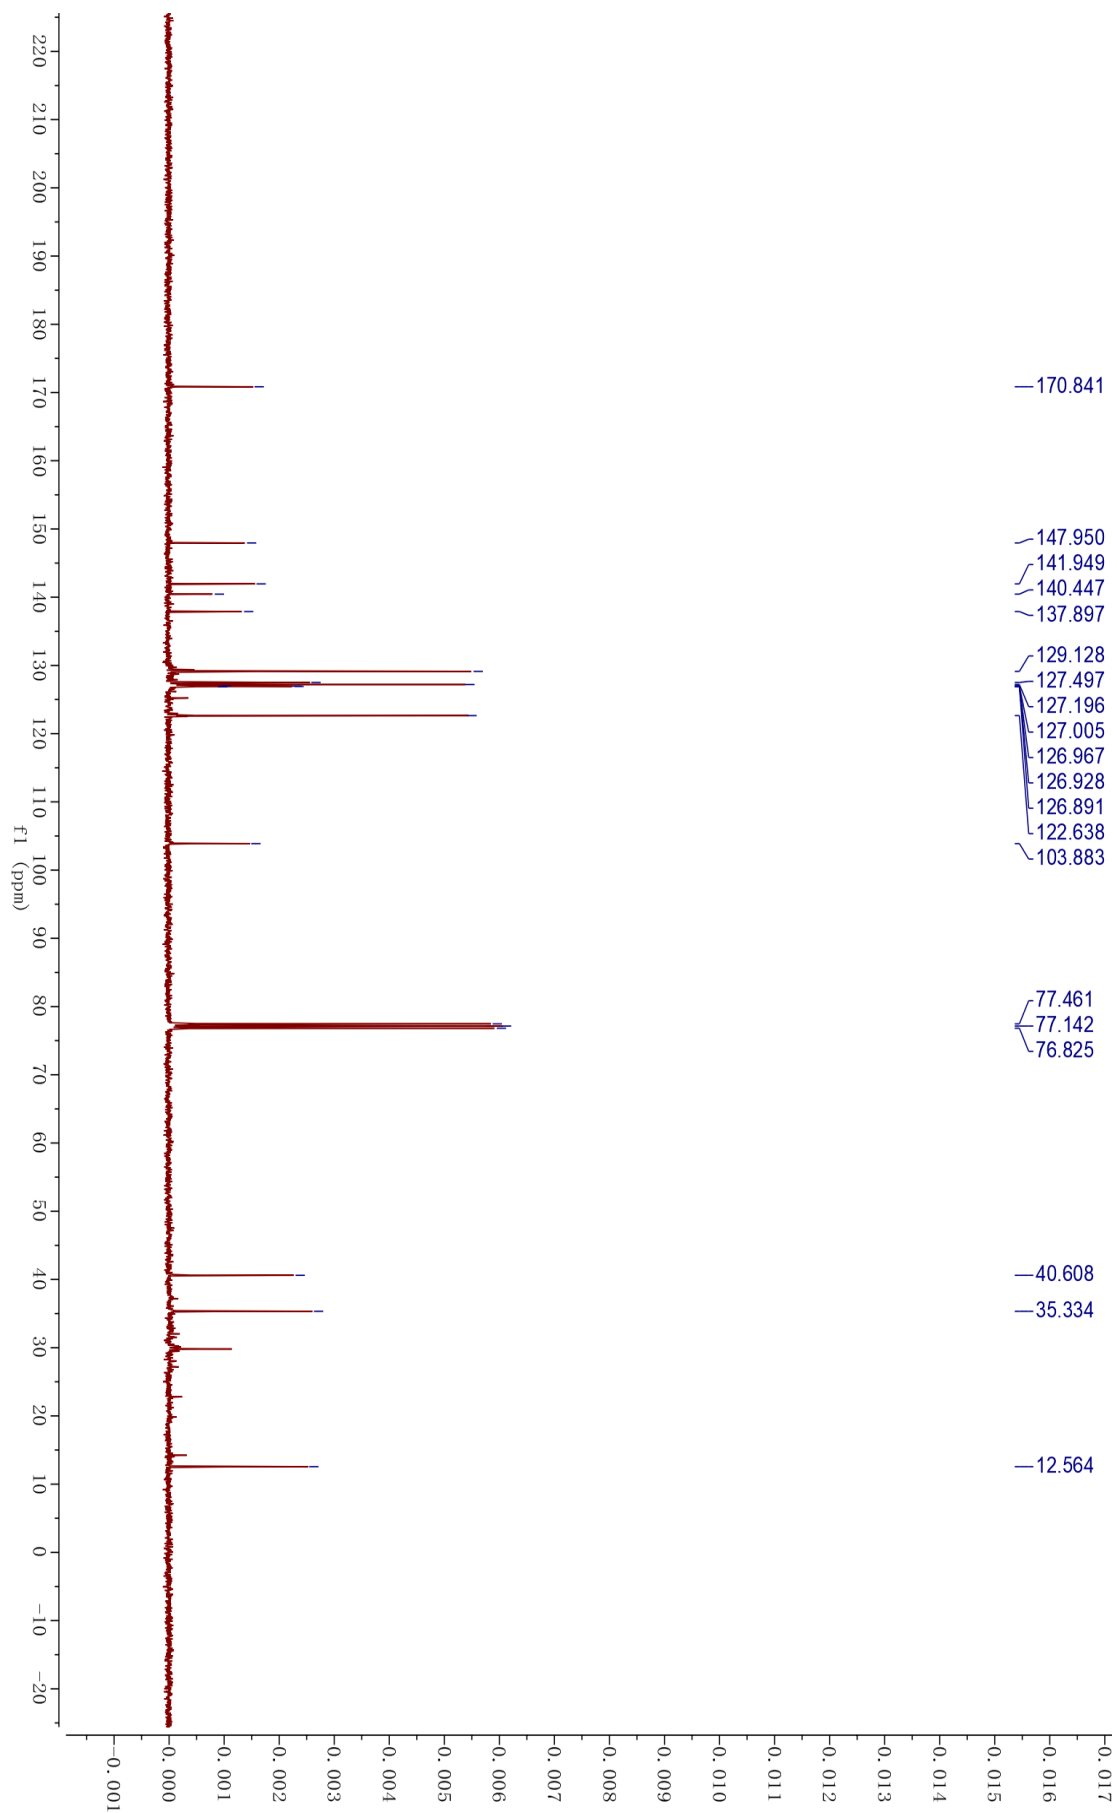

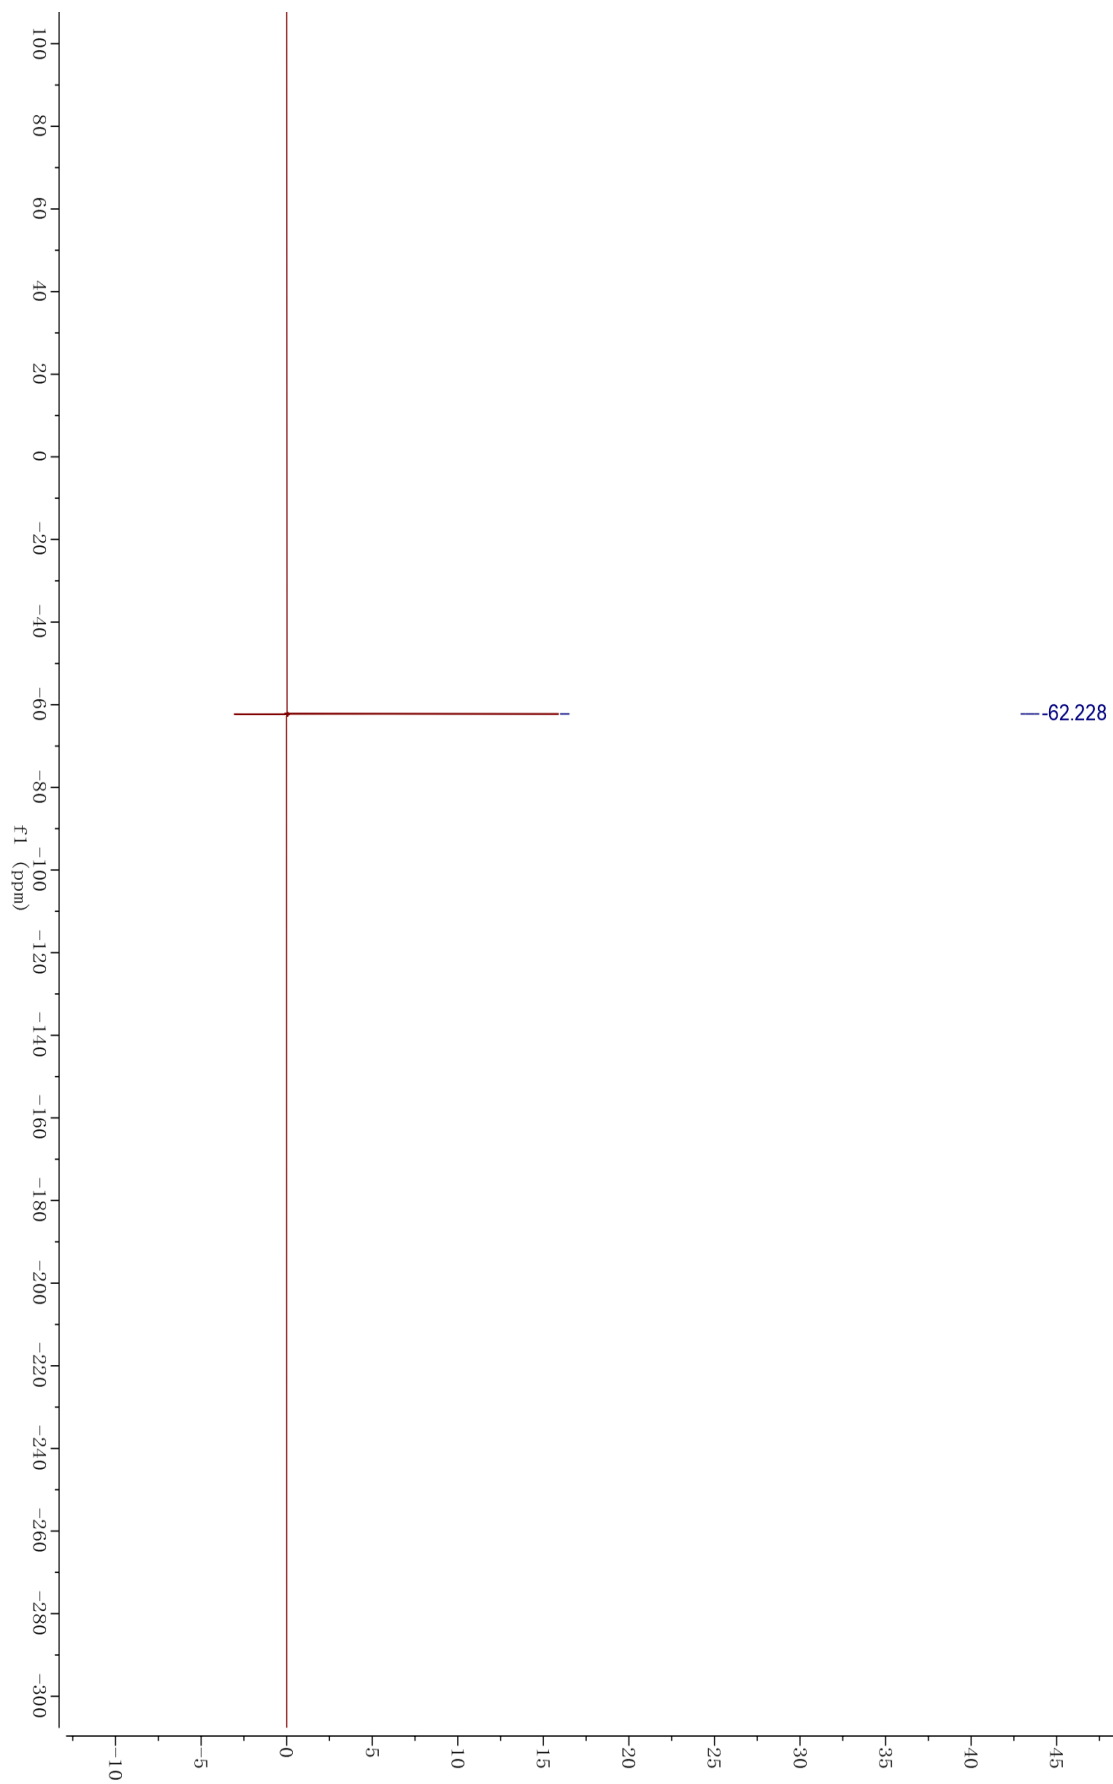

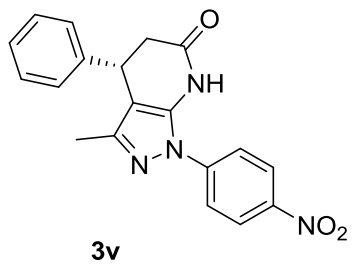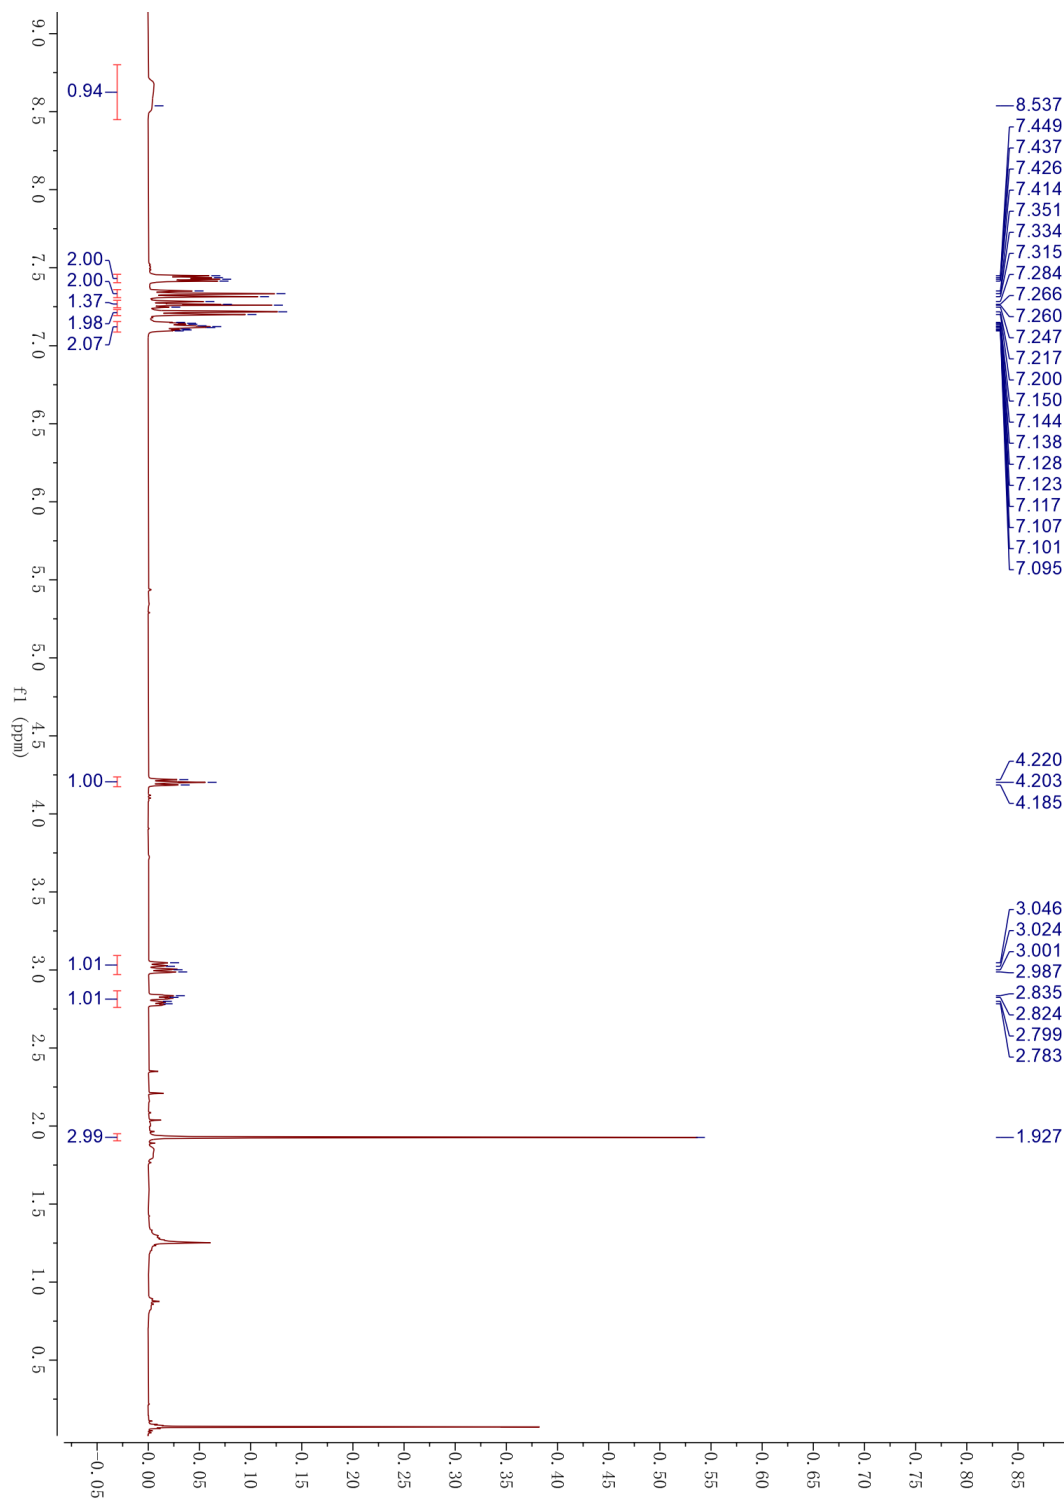

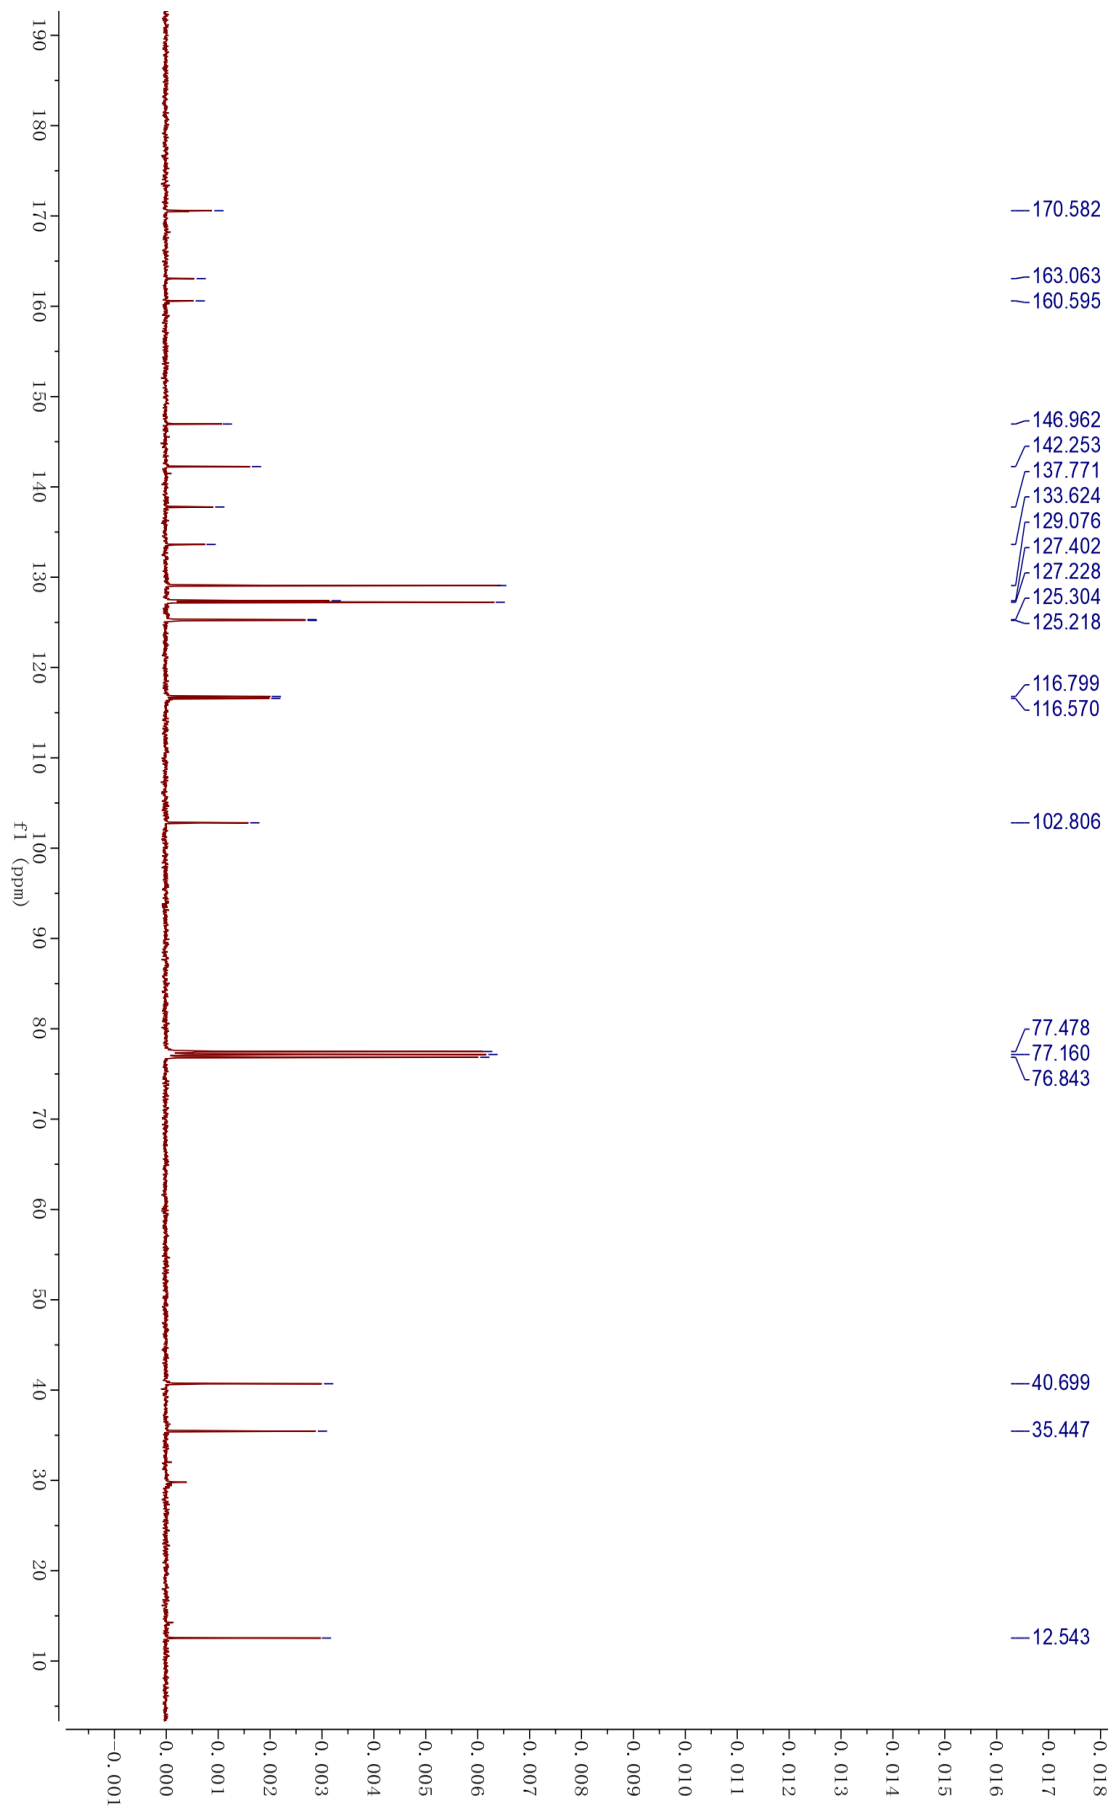



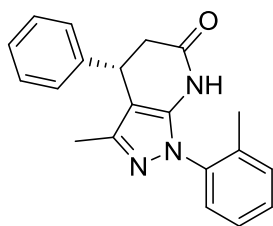

**3w**

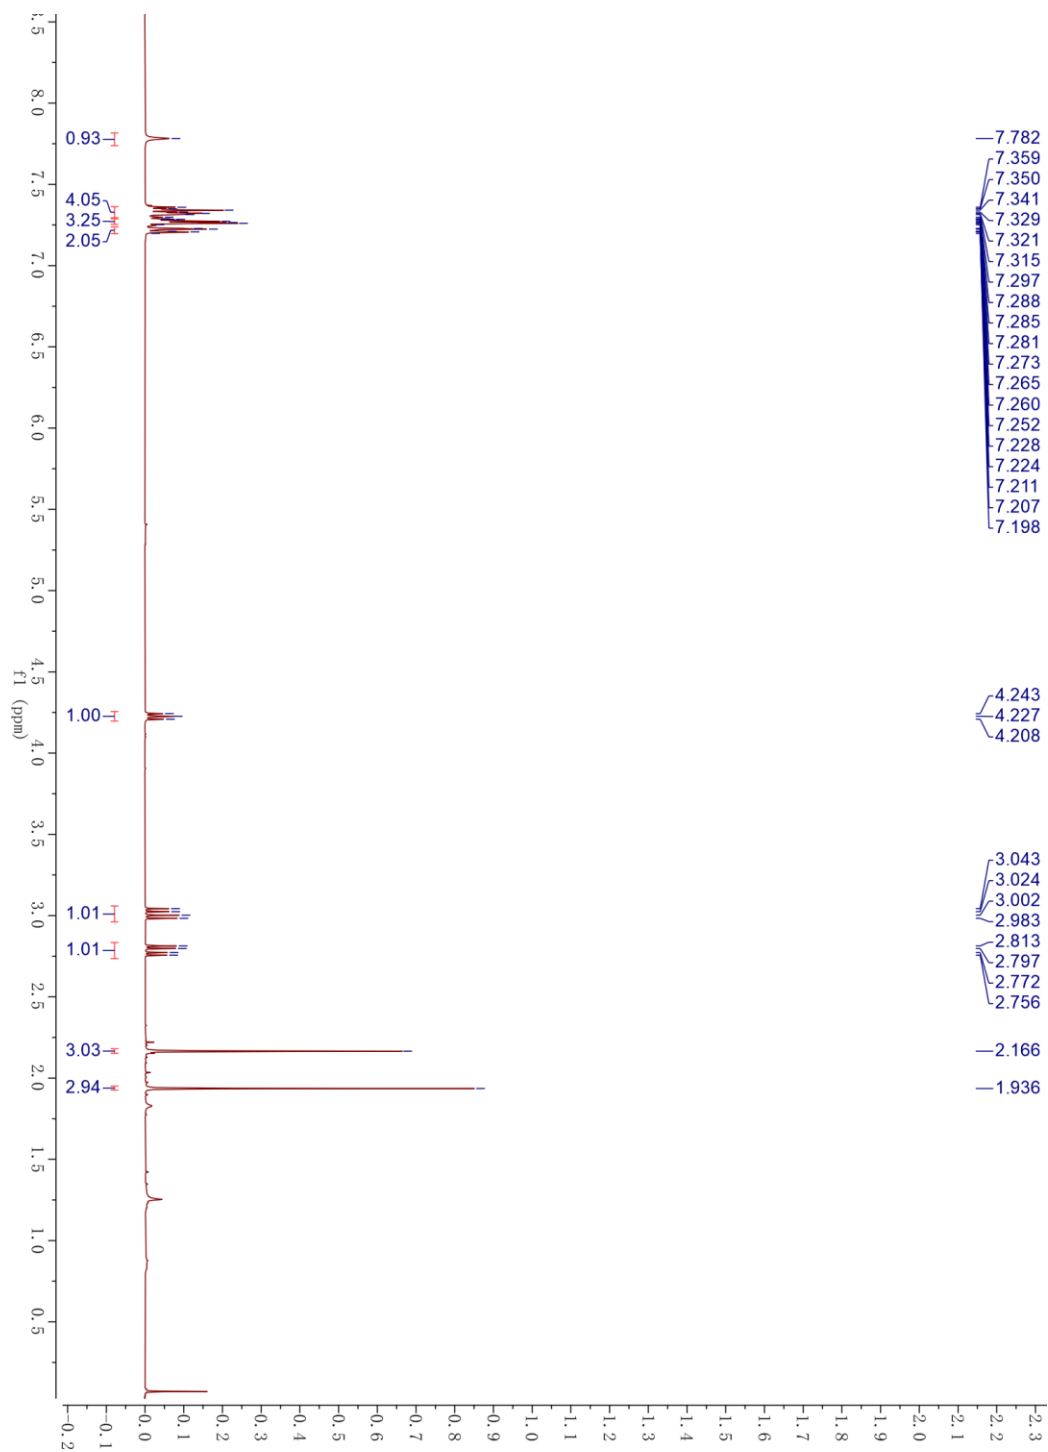

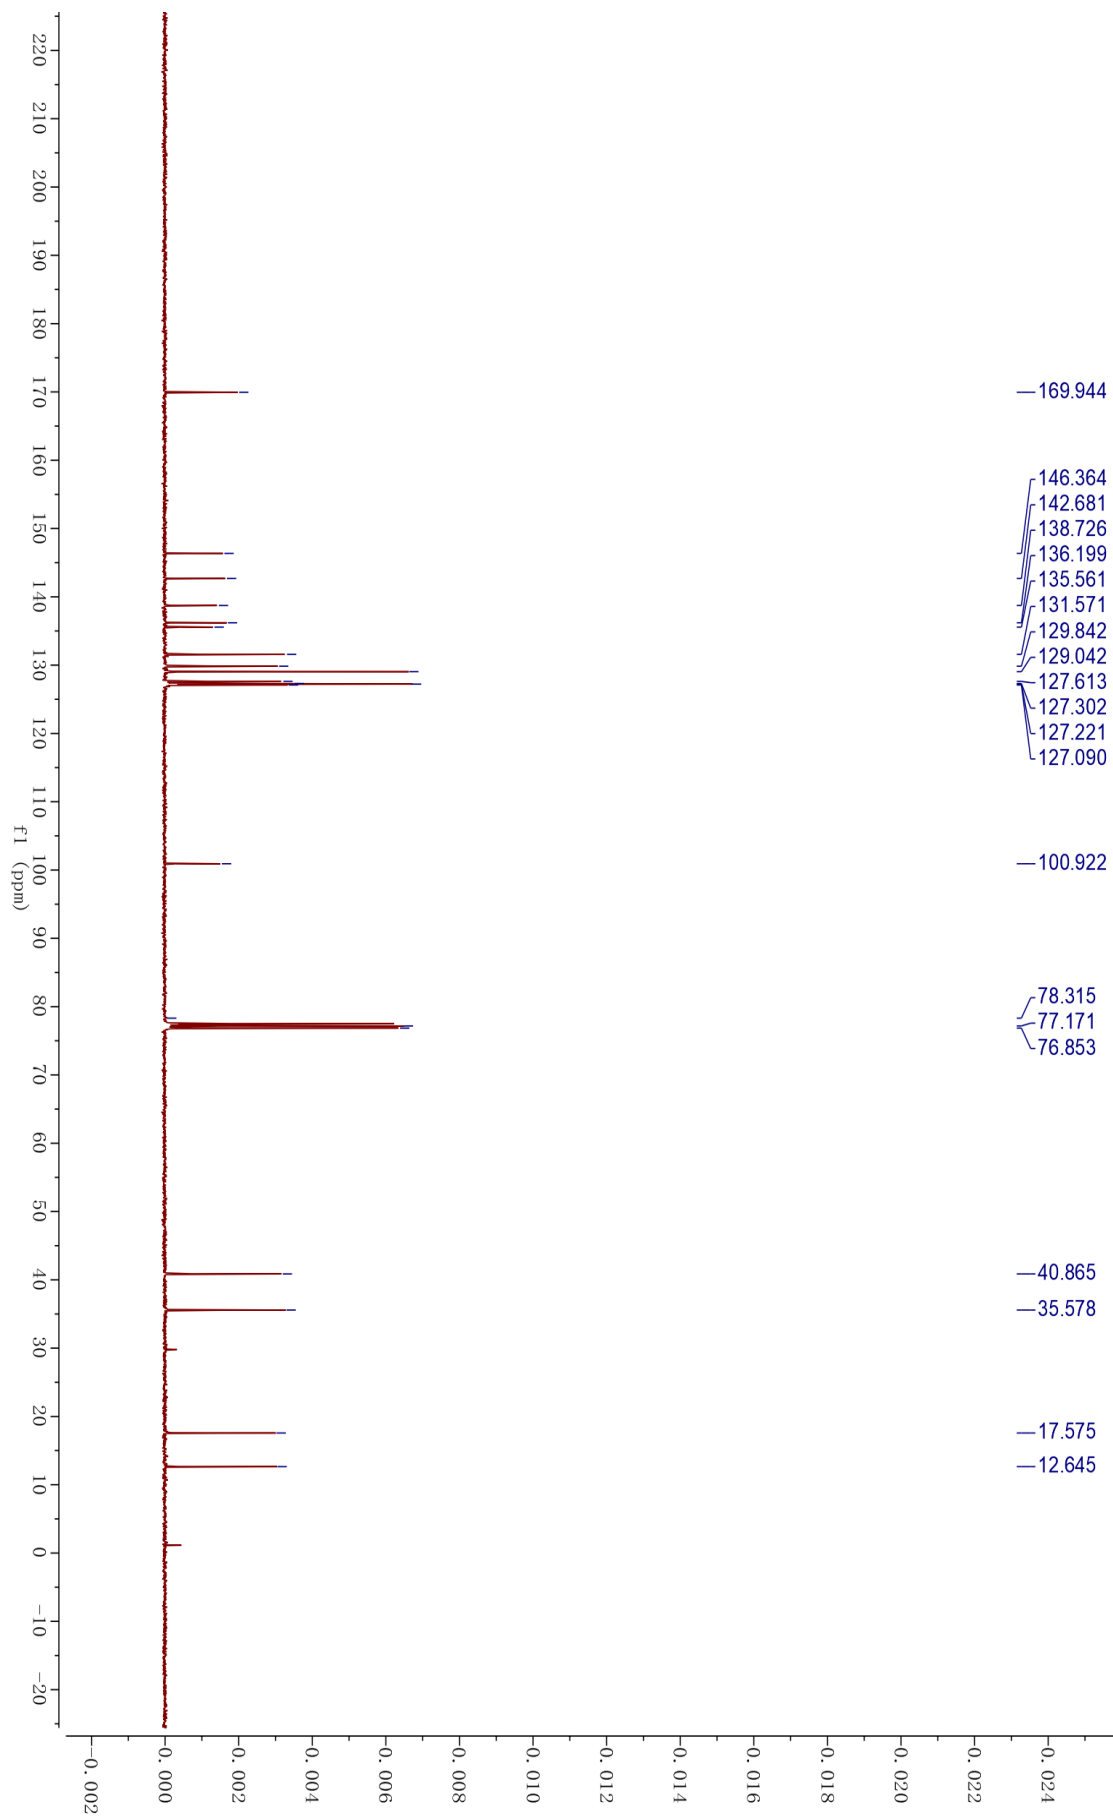

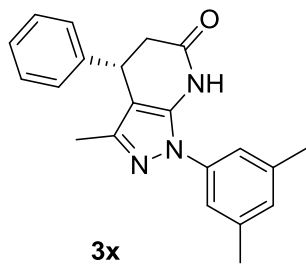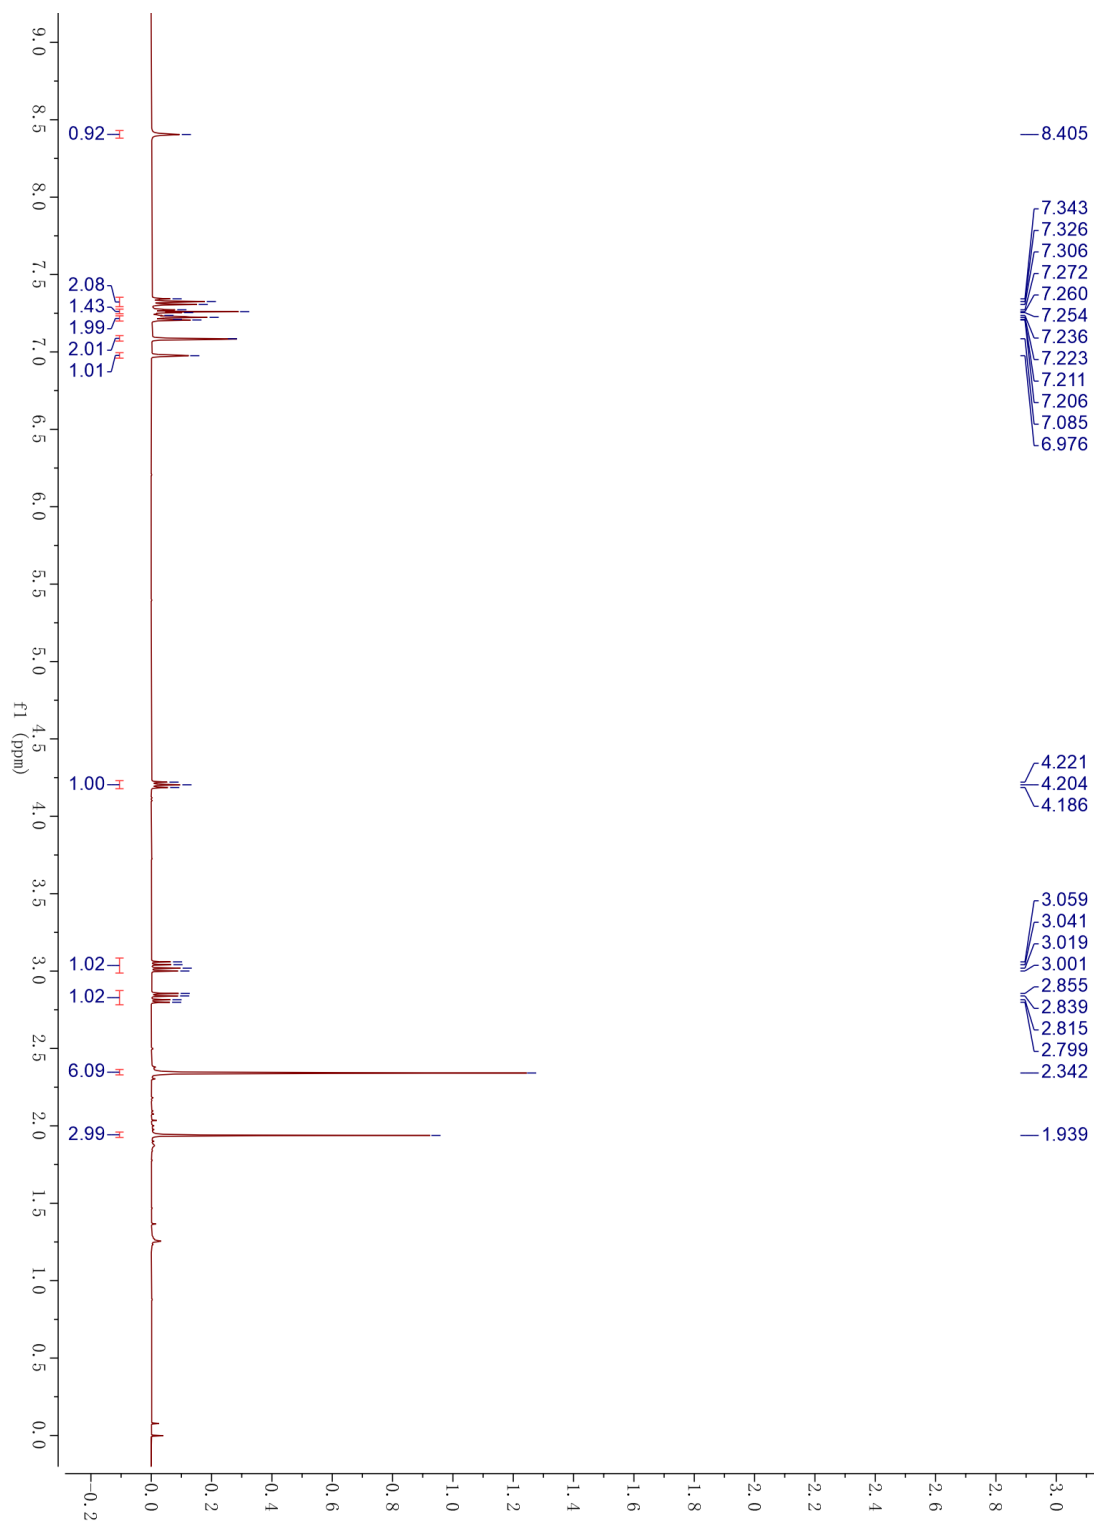

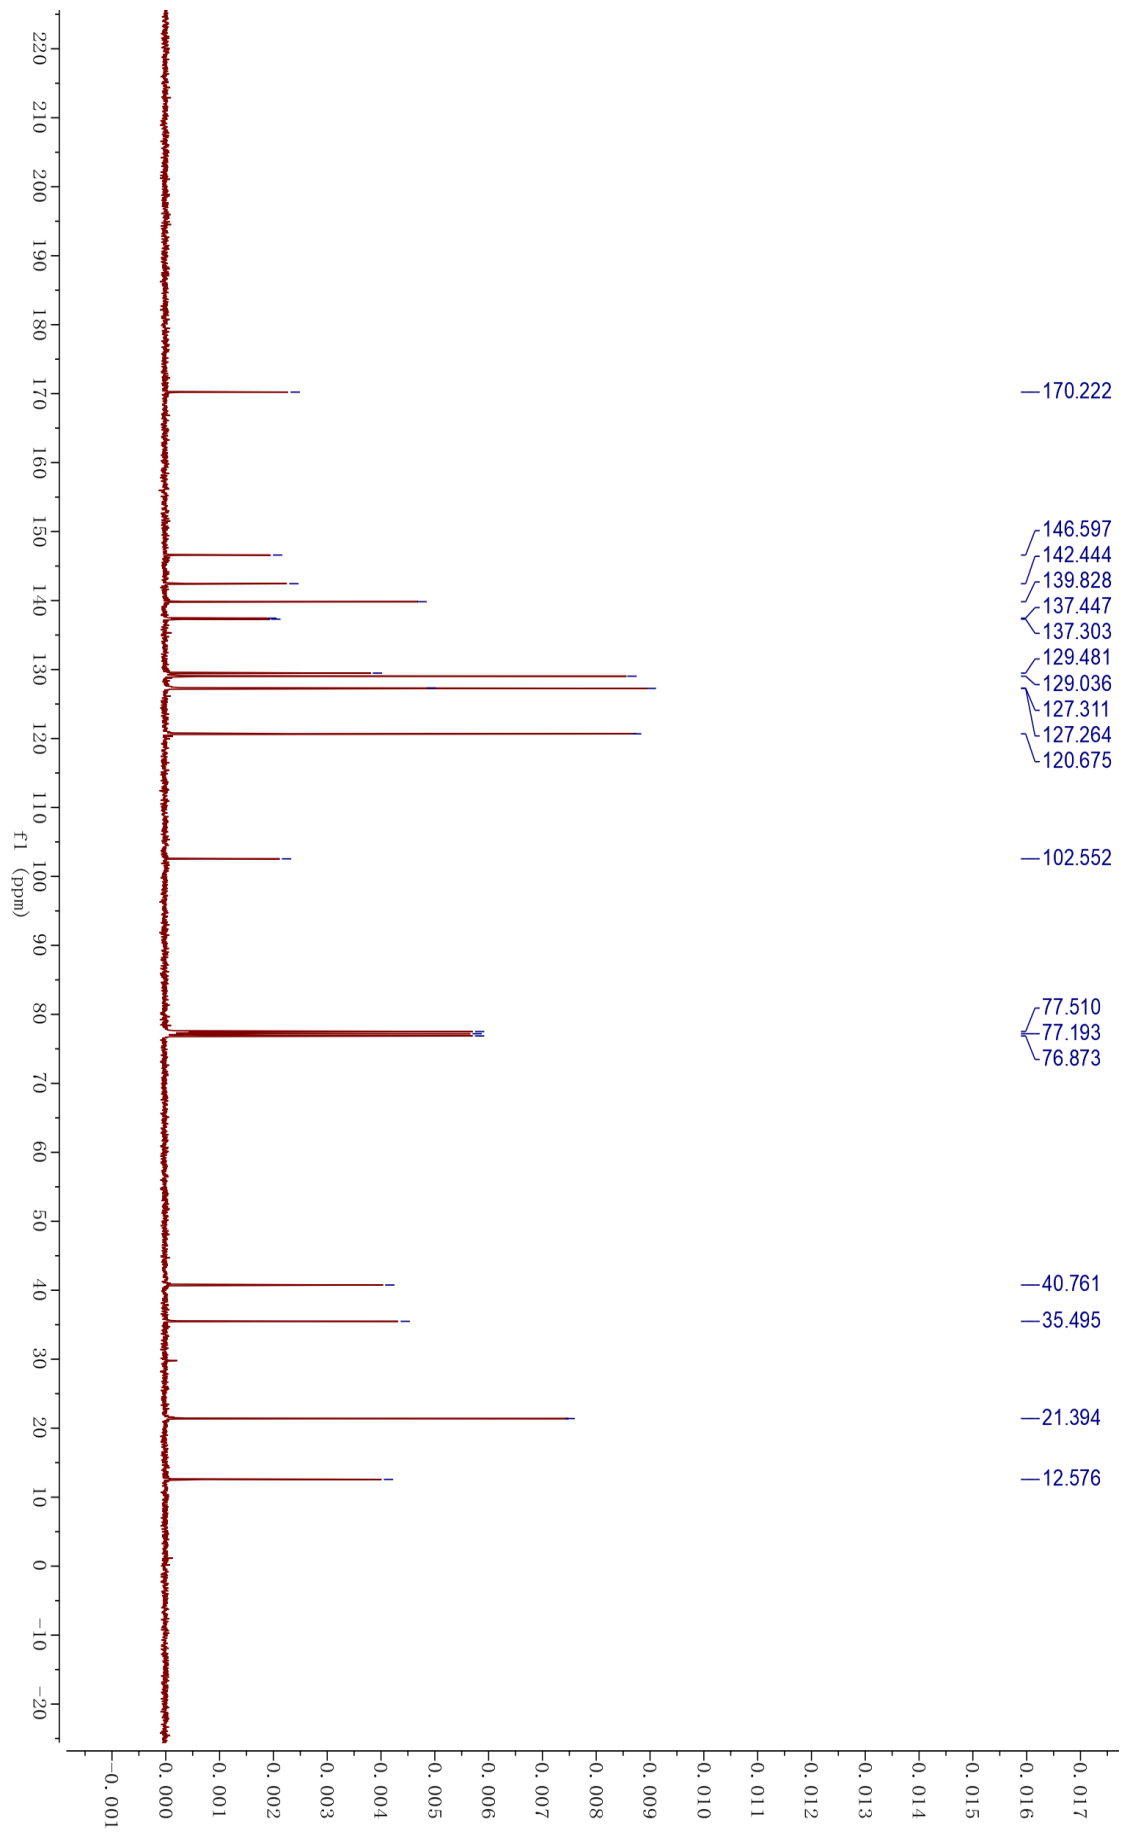

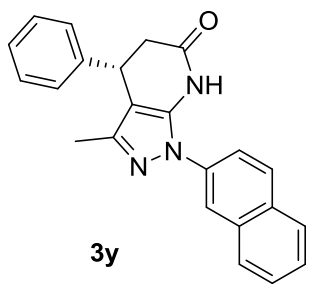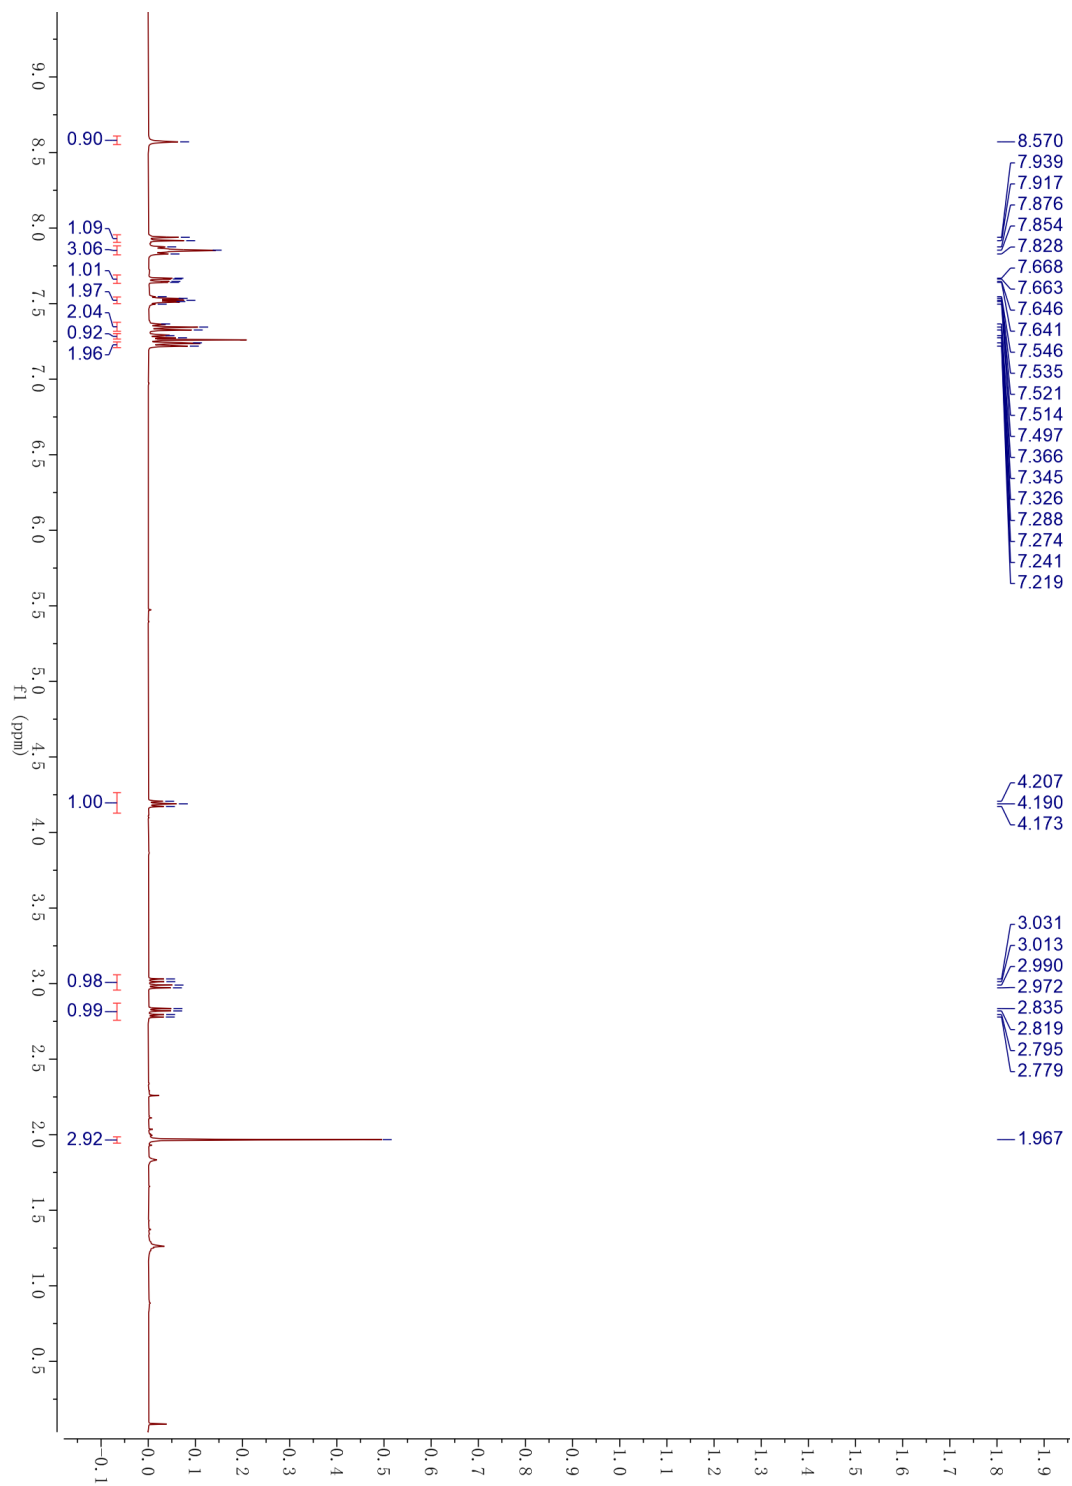

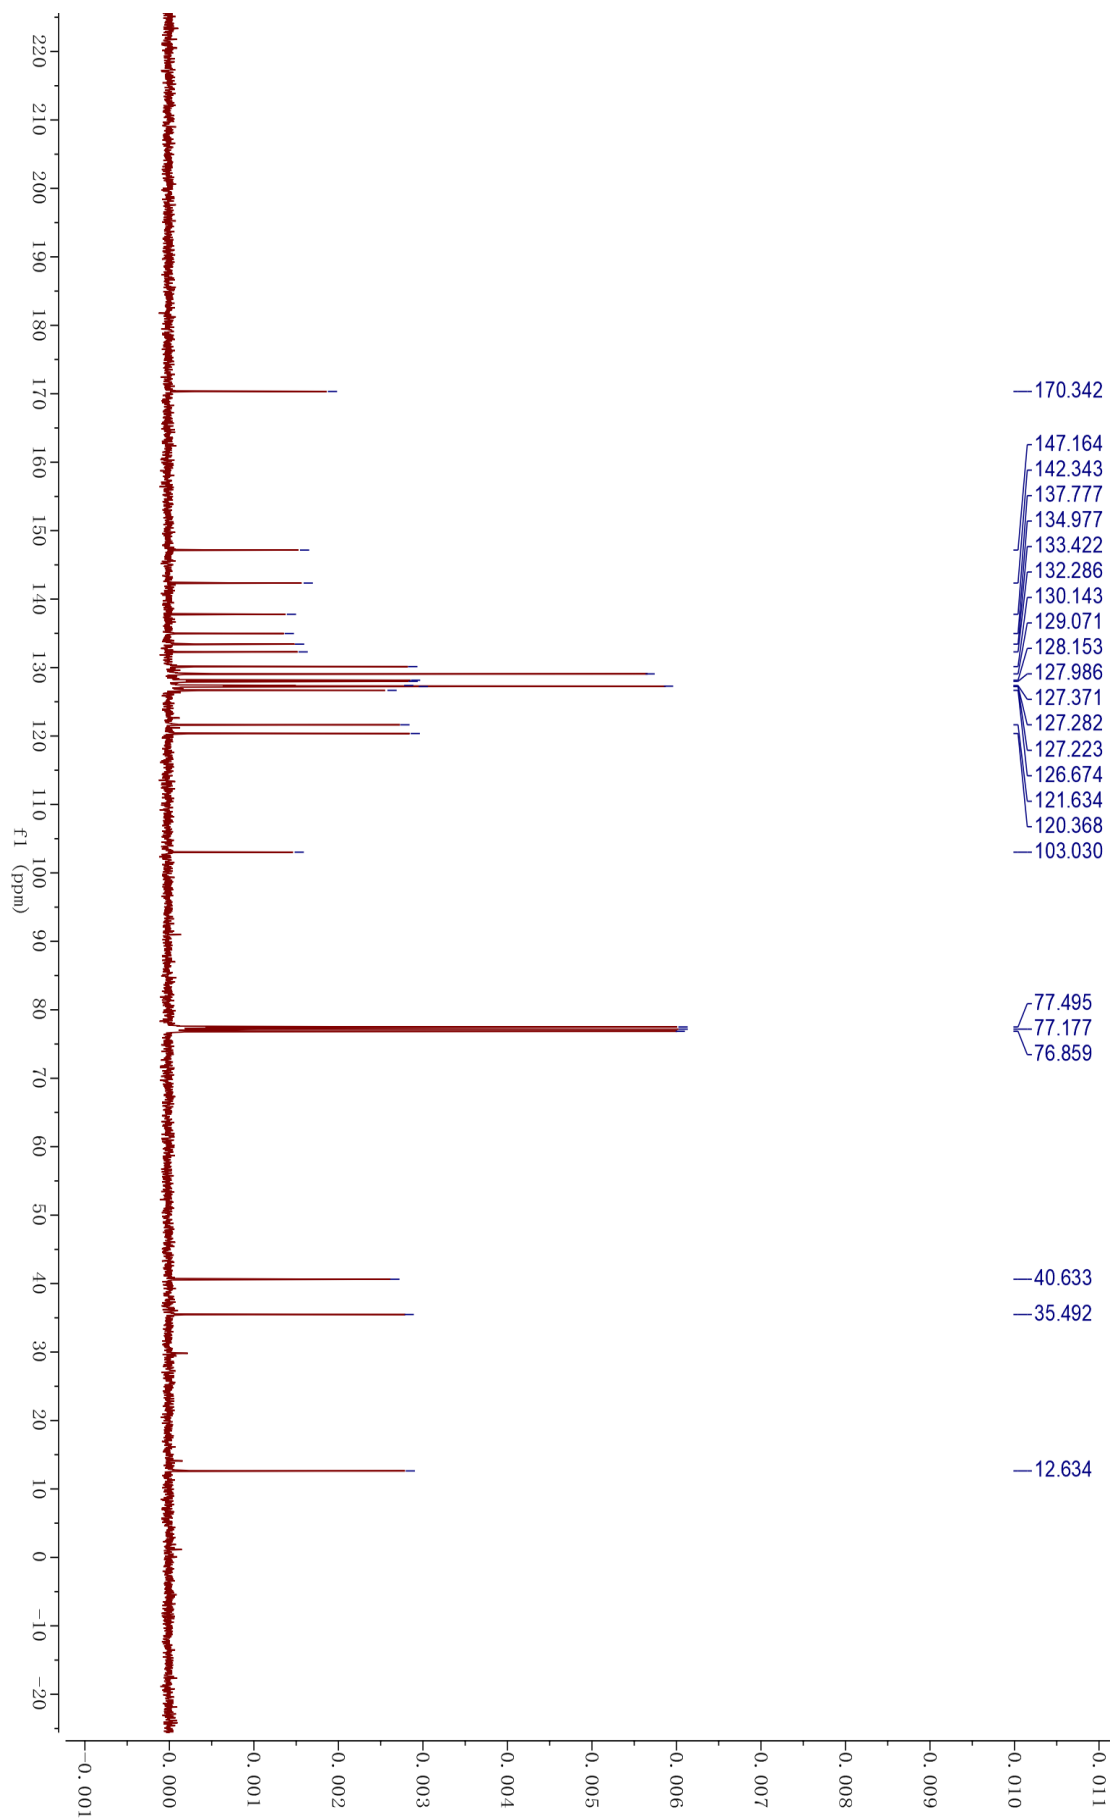

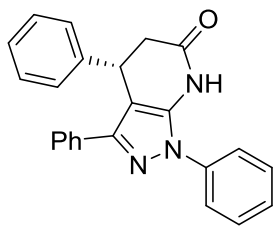

**3z**

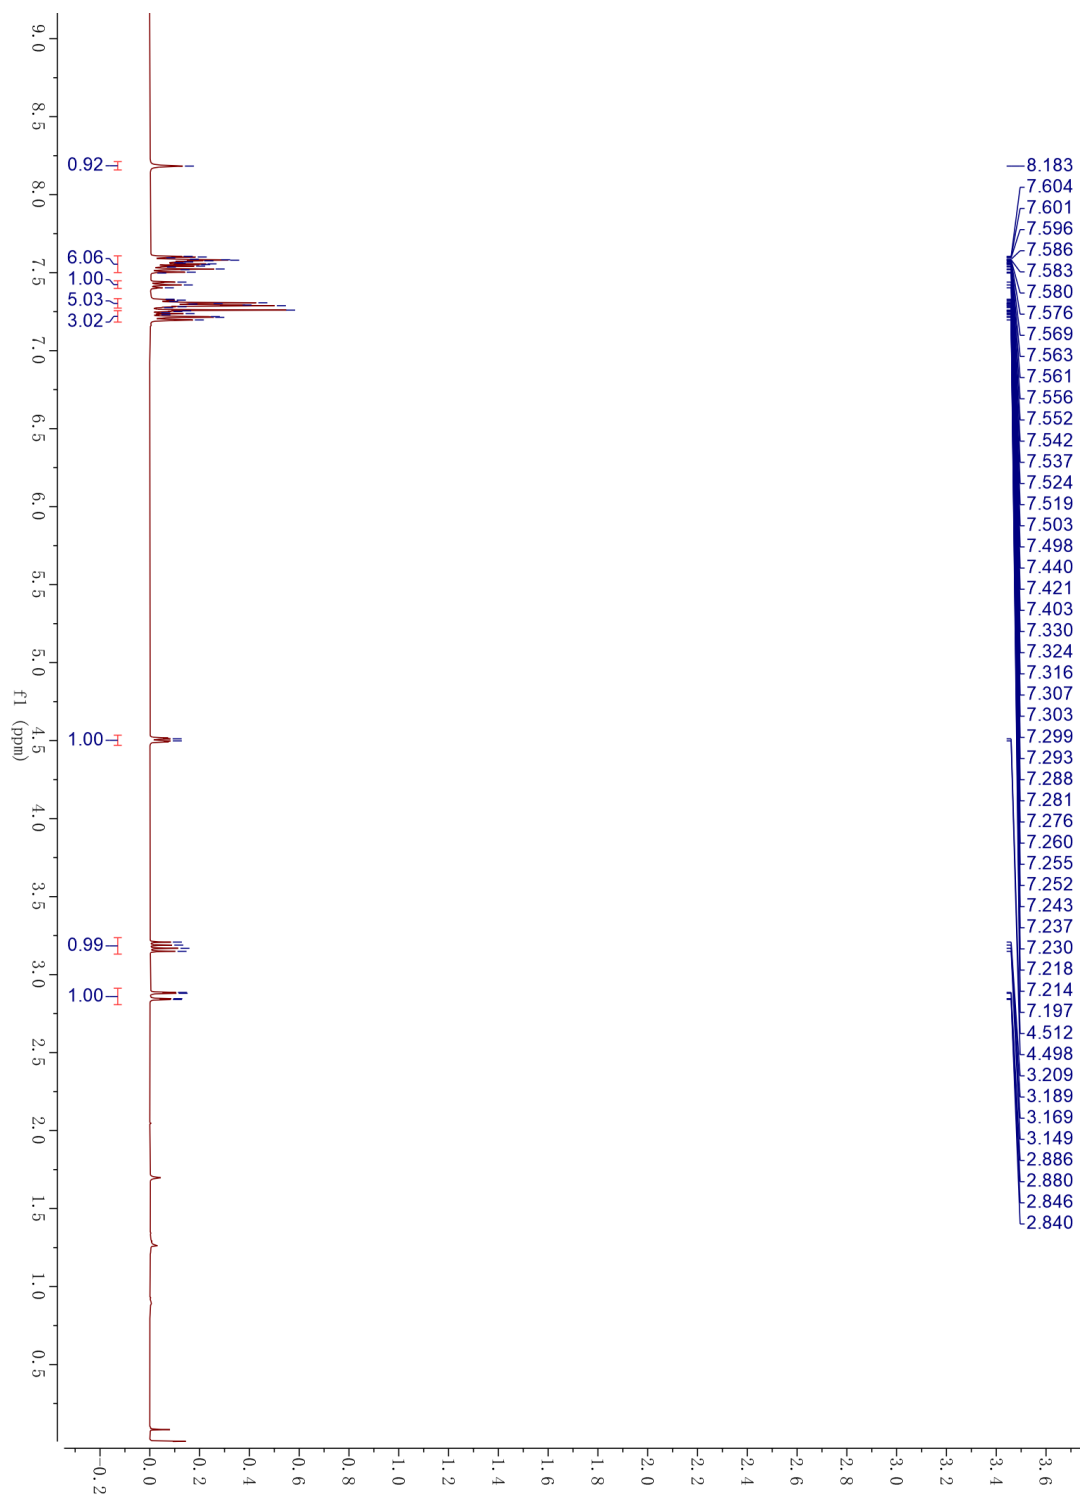

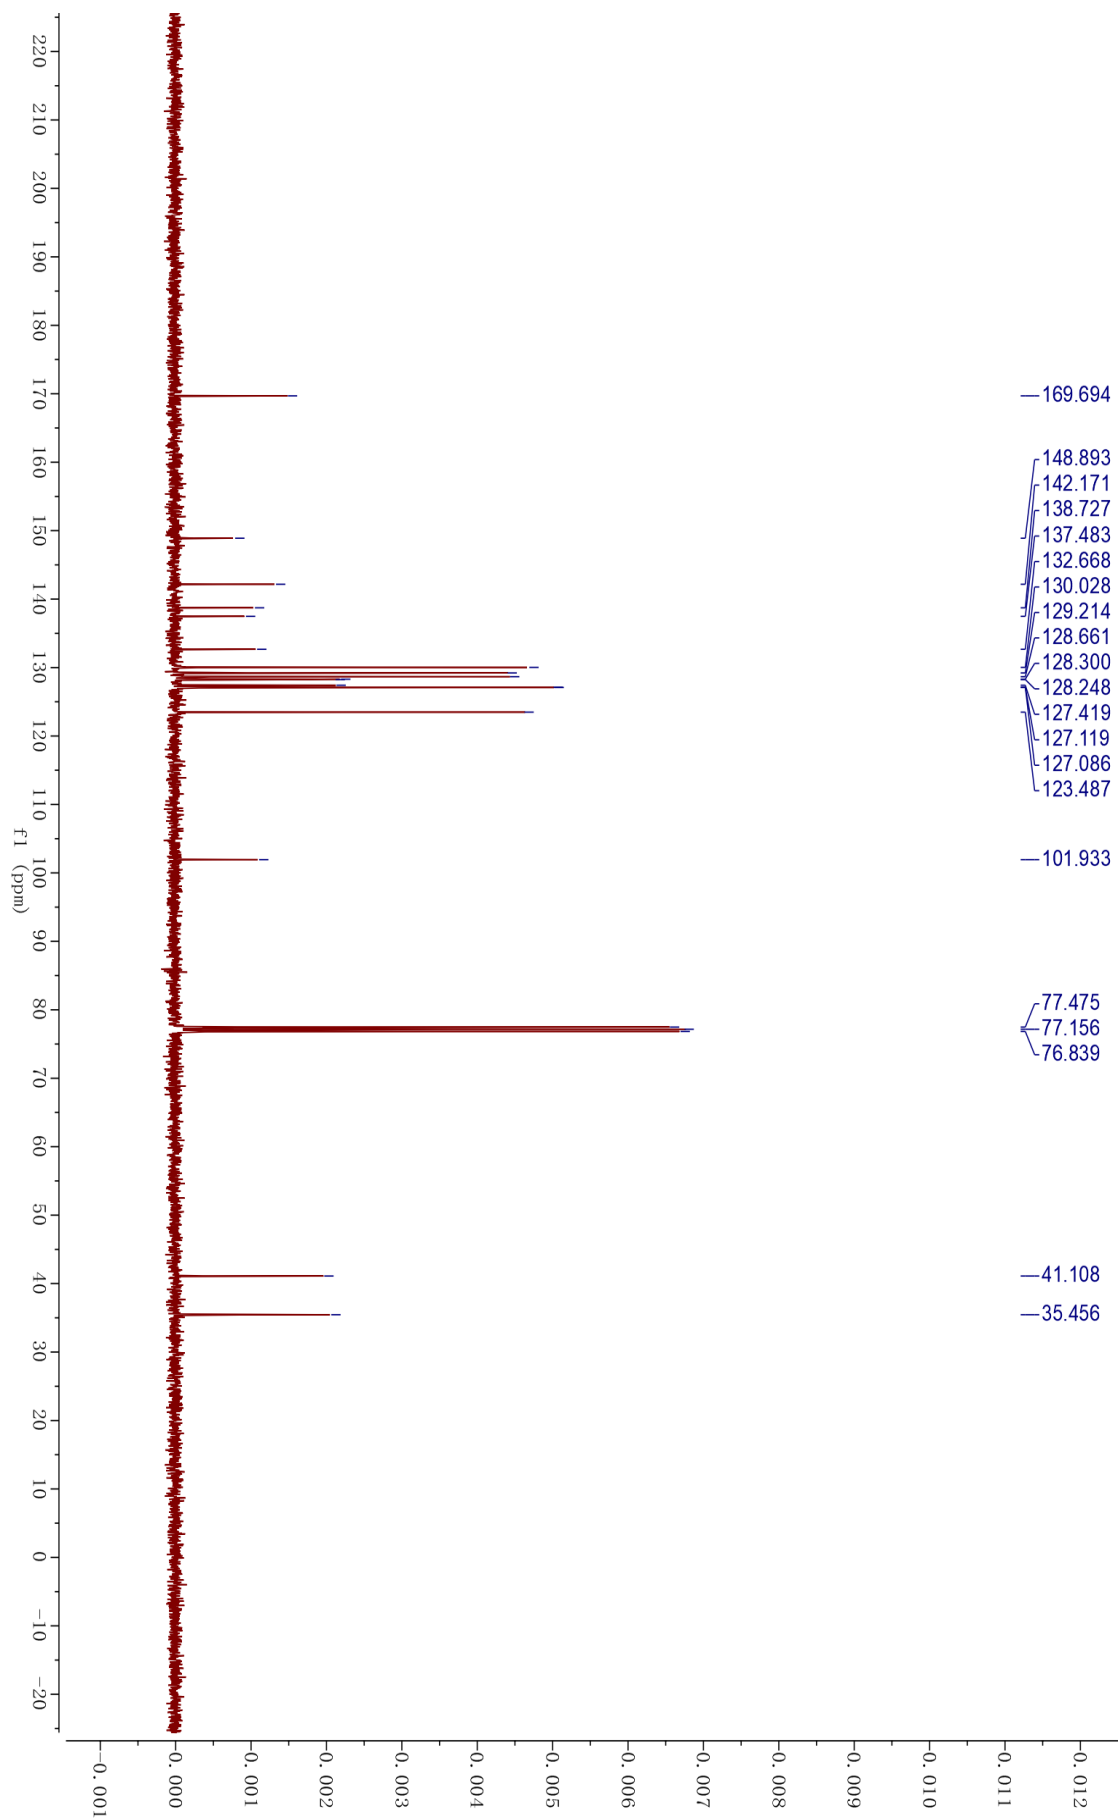



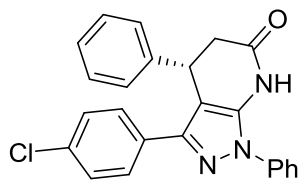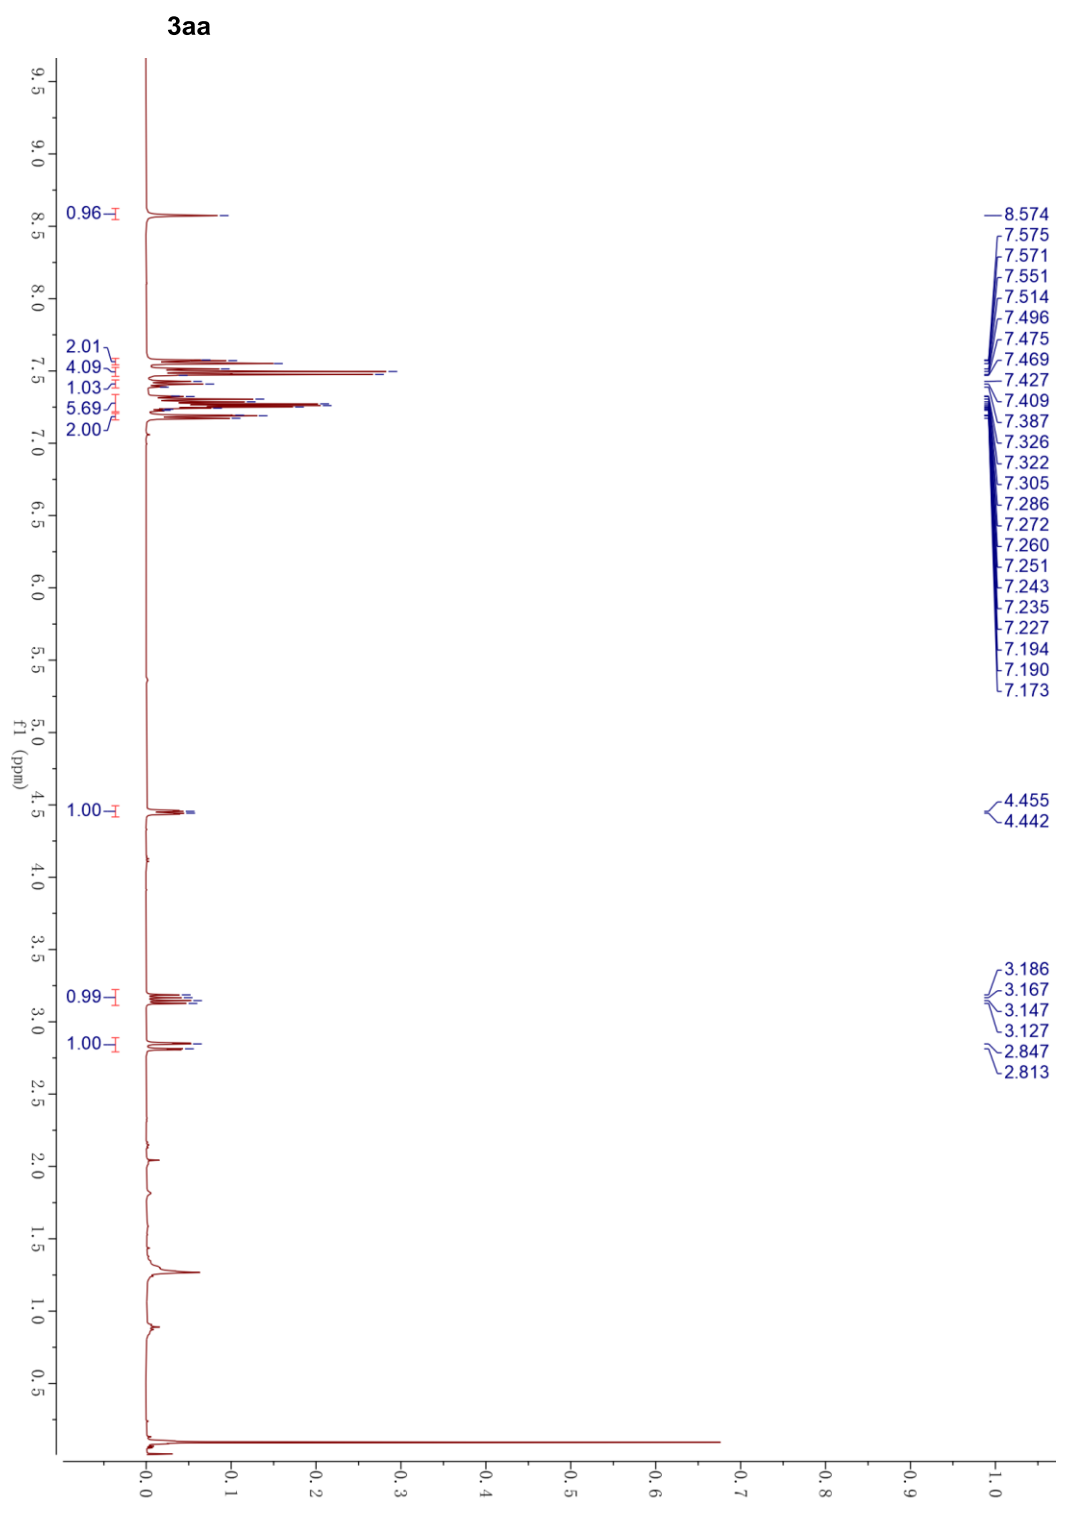

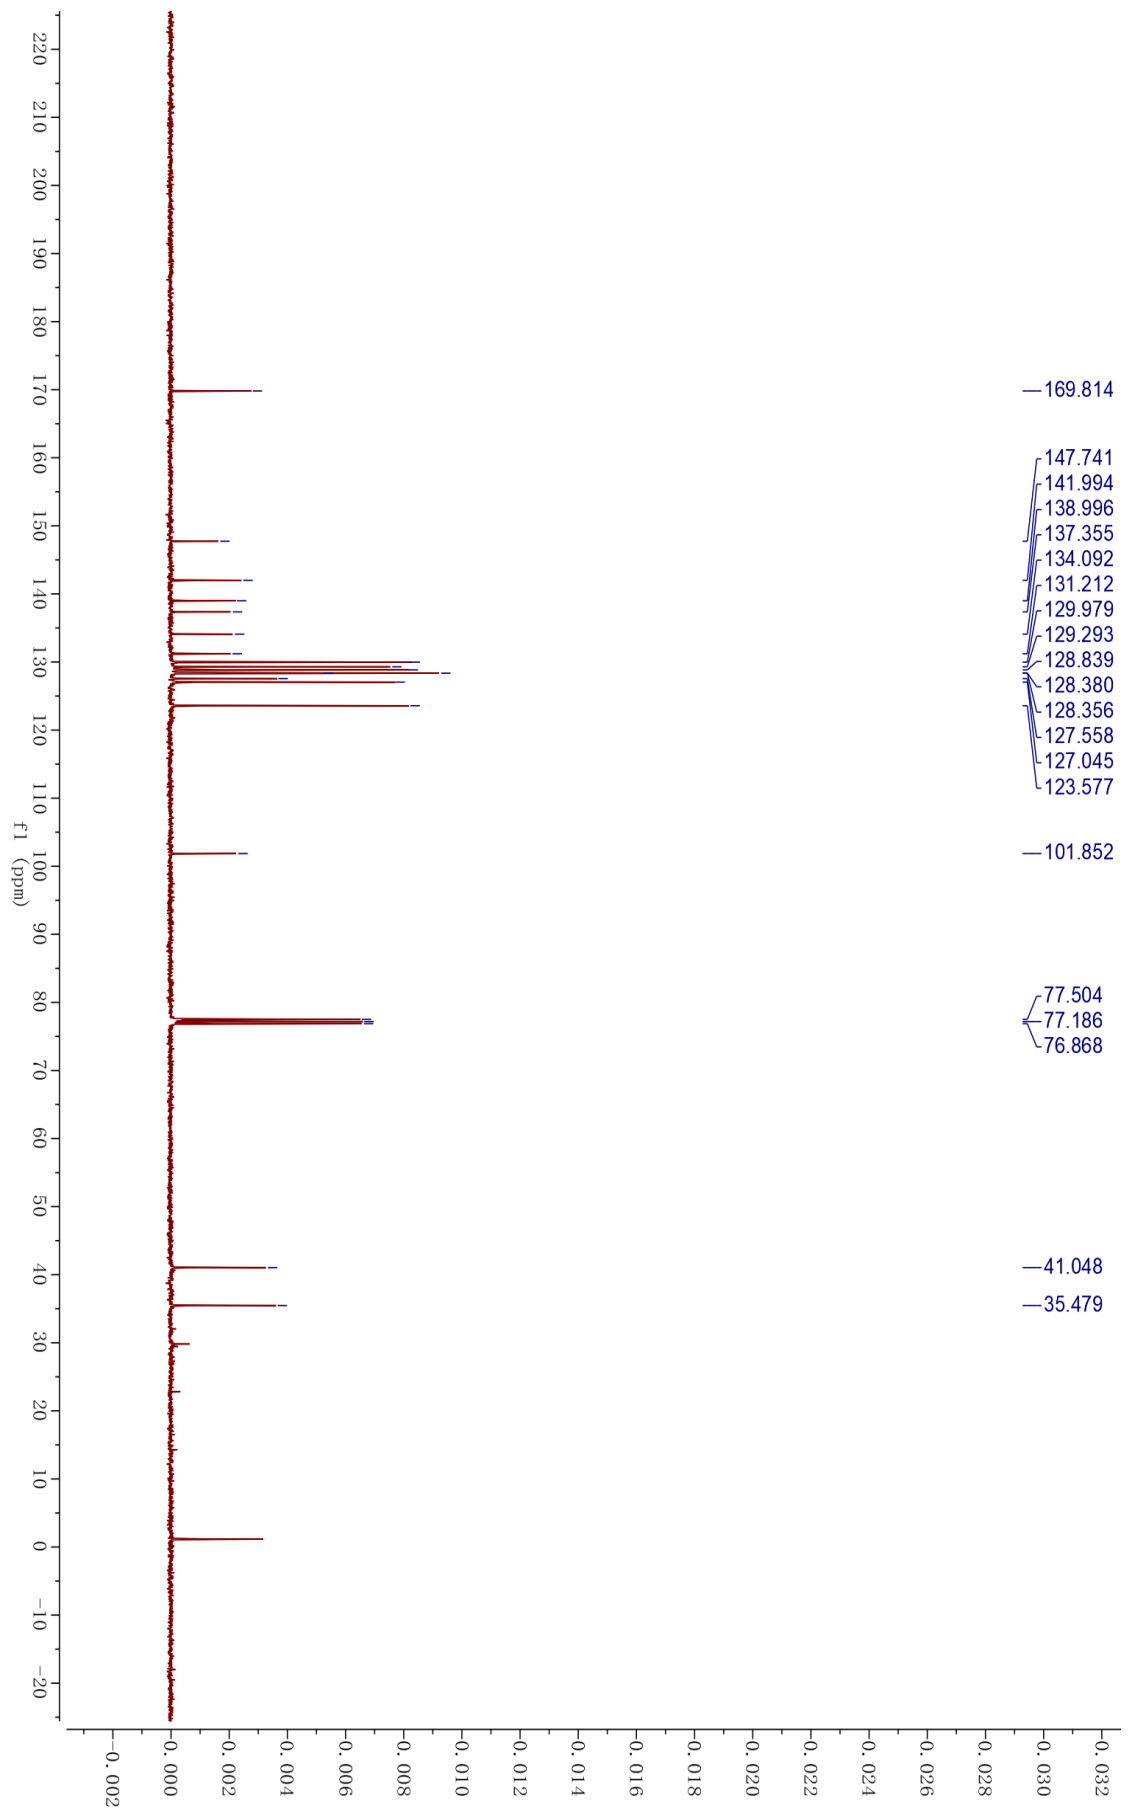

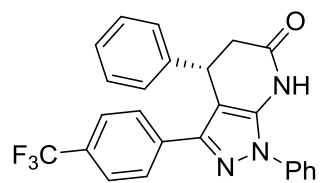

**3ab**

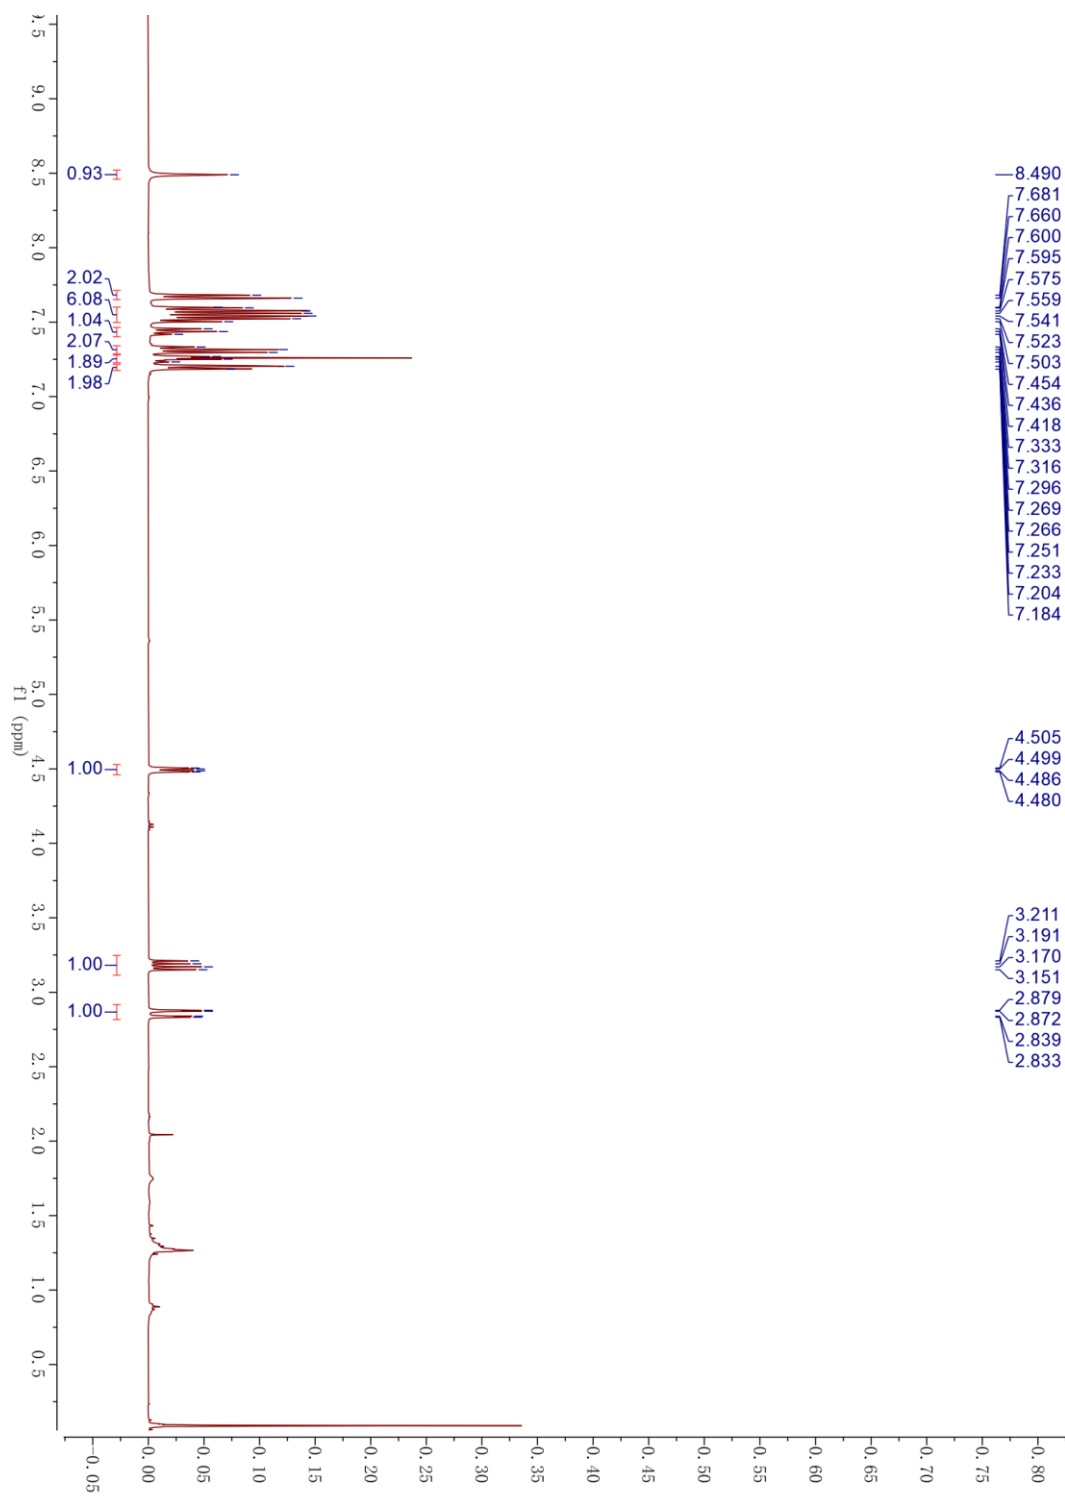

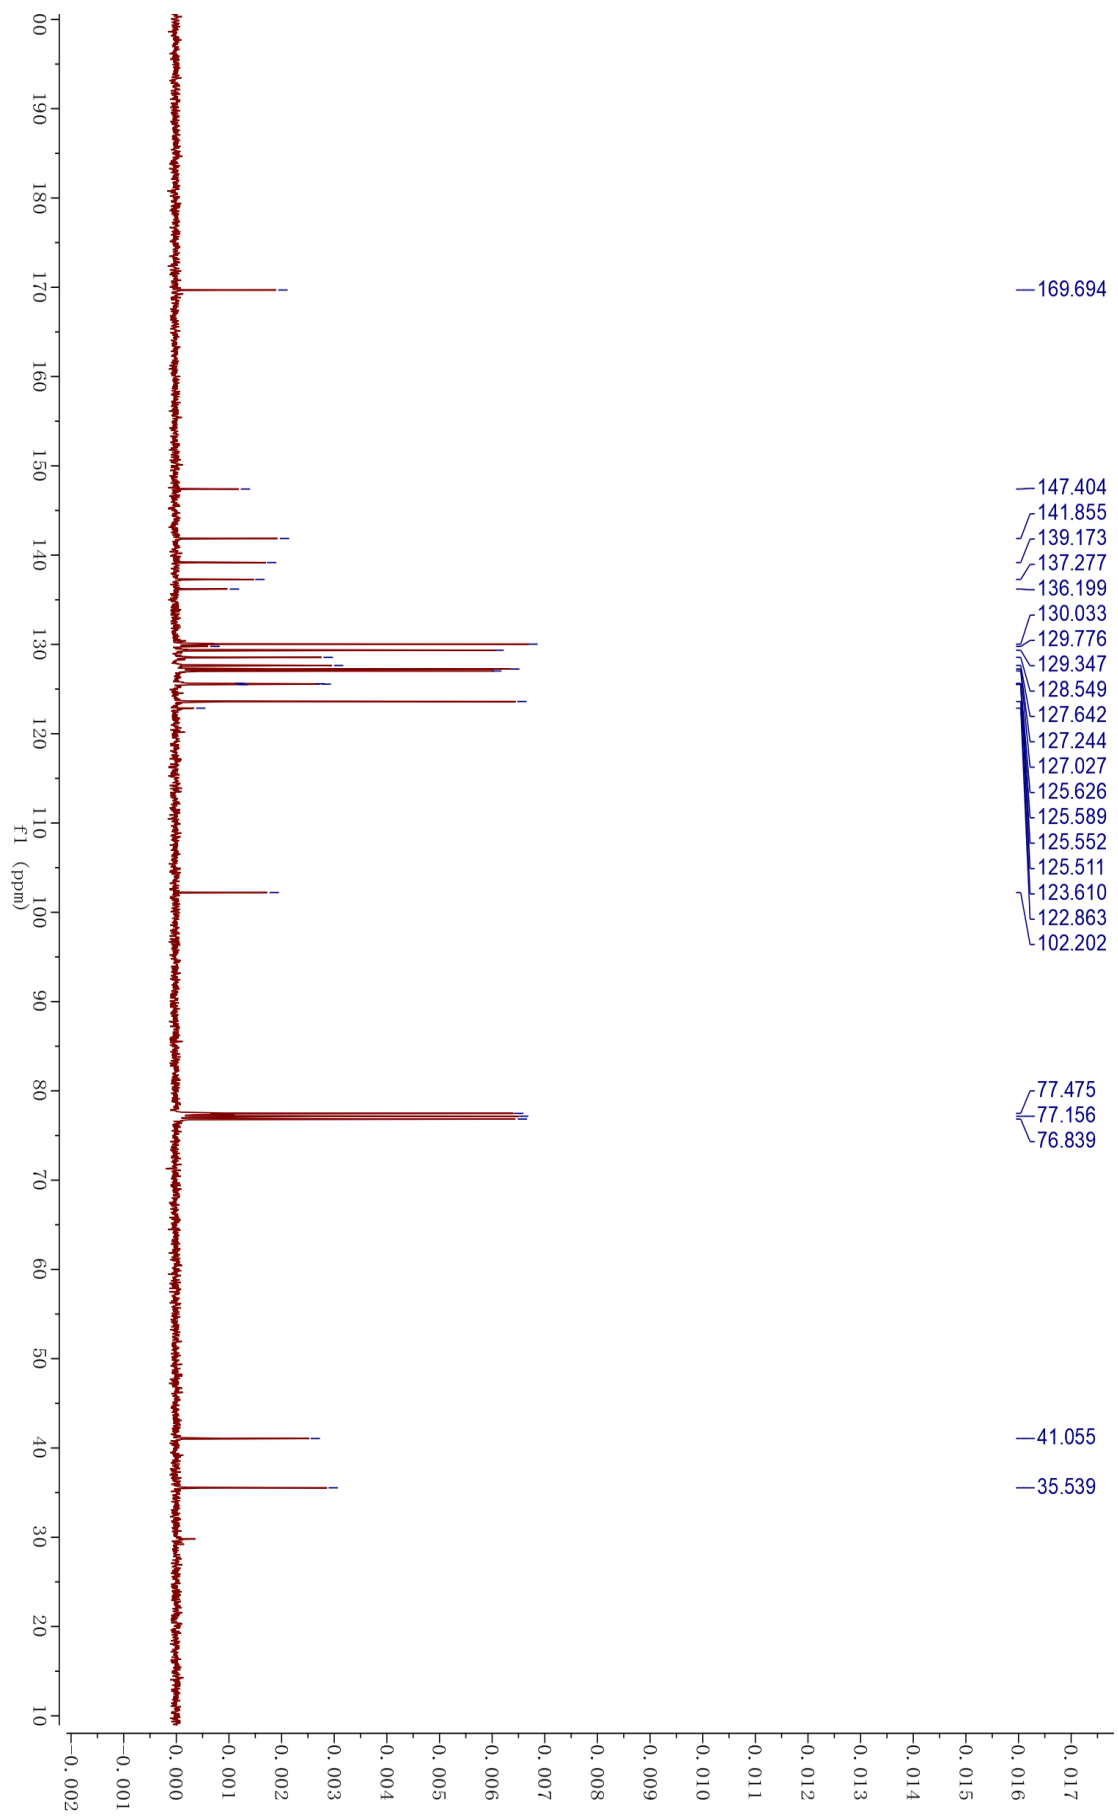

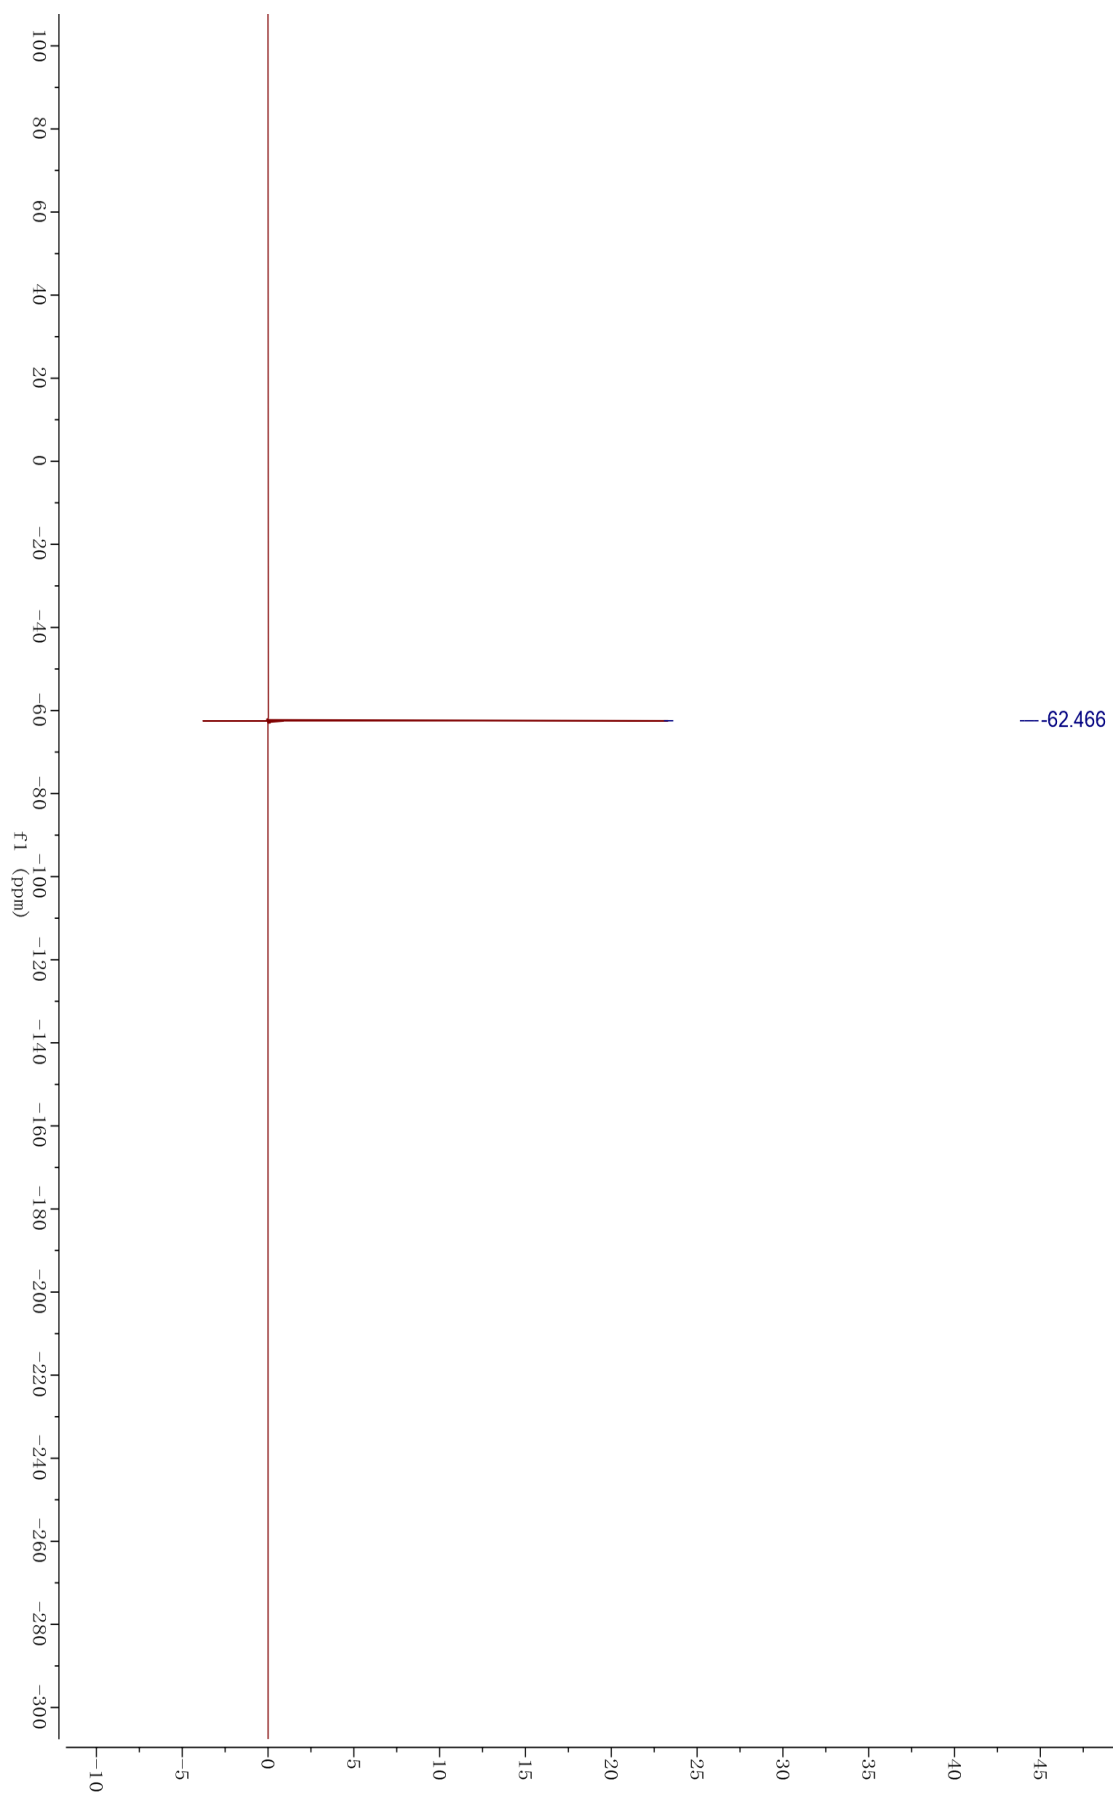

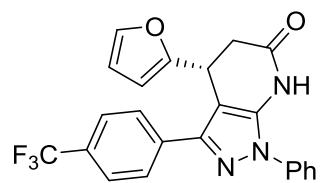

**3ac**

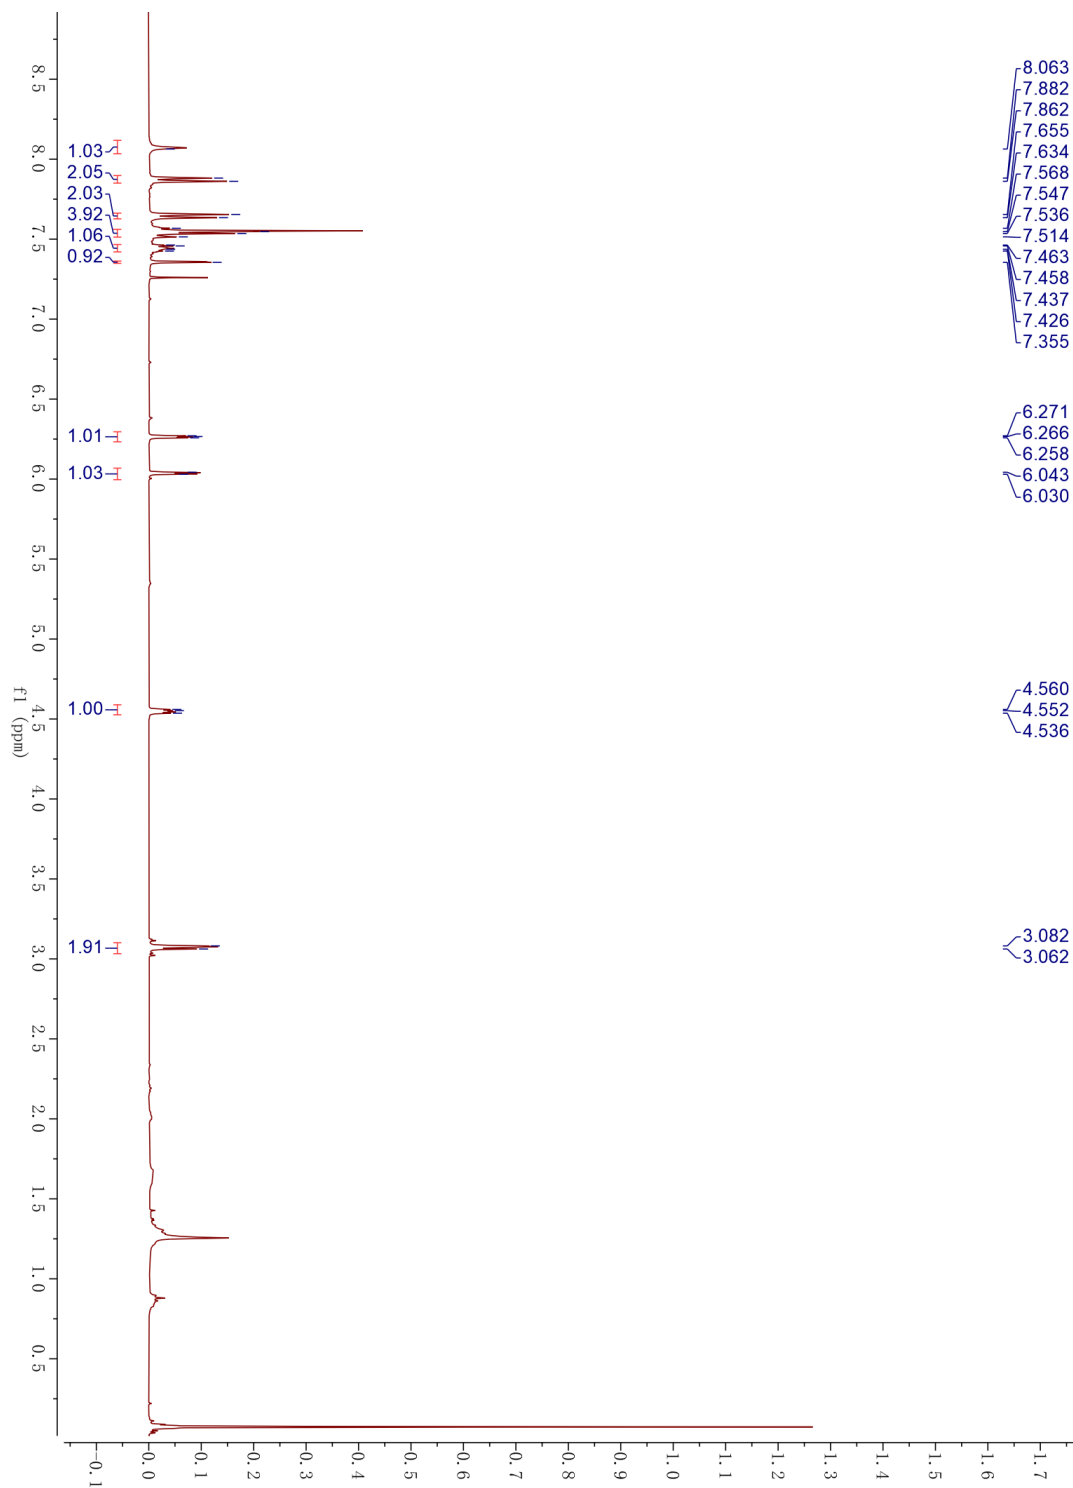

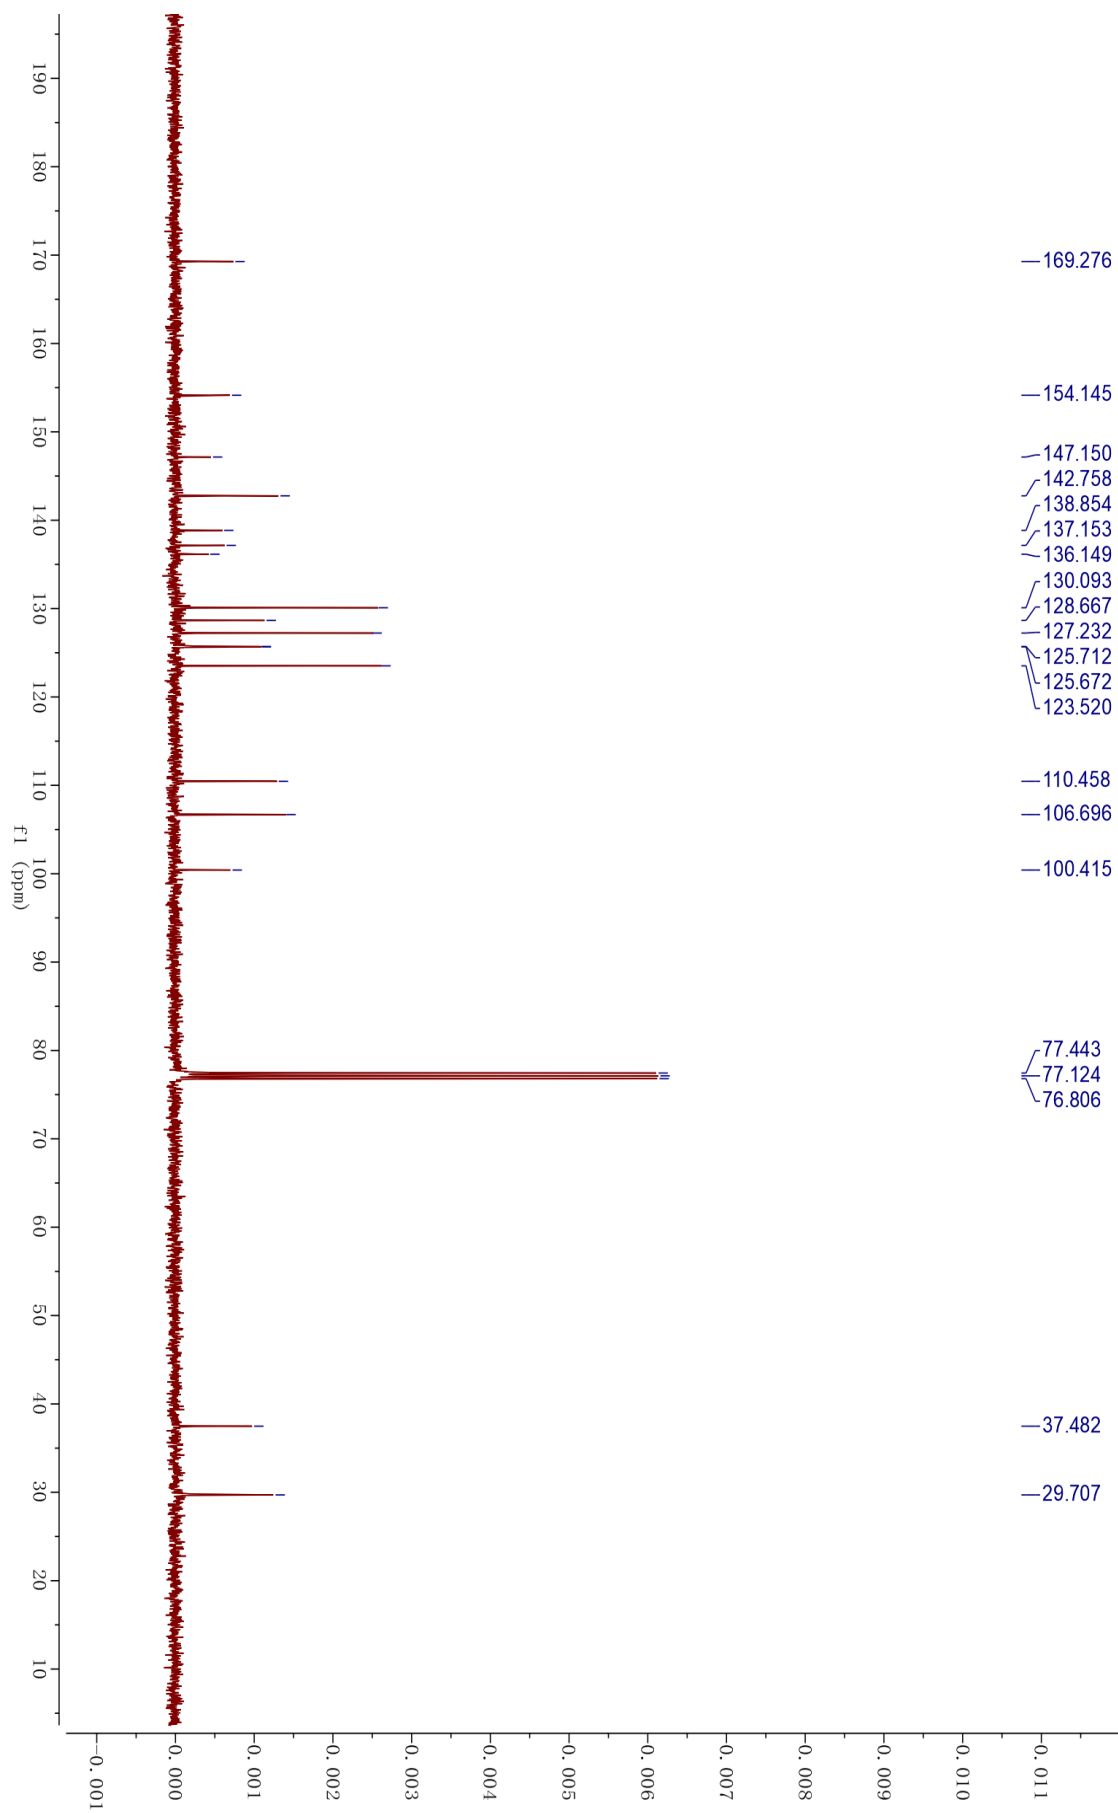

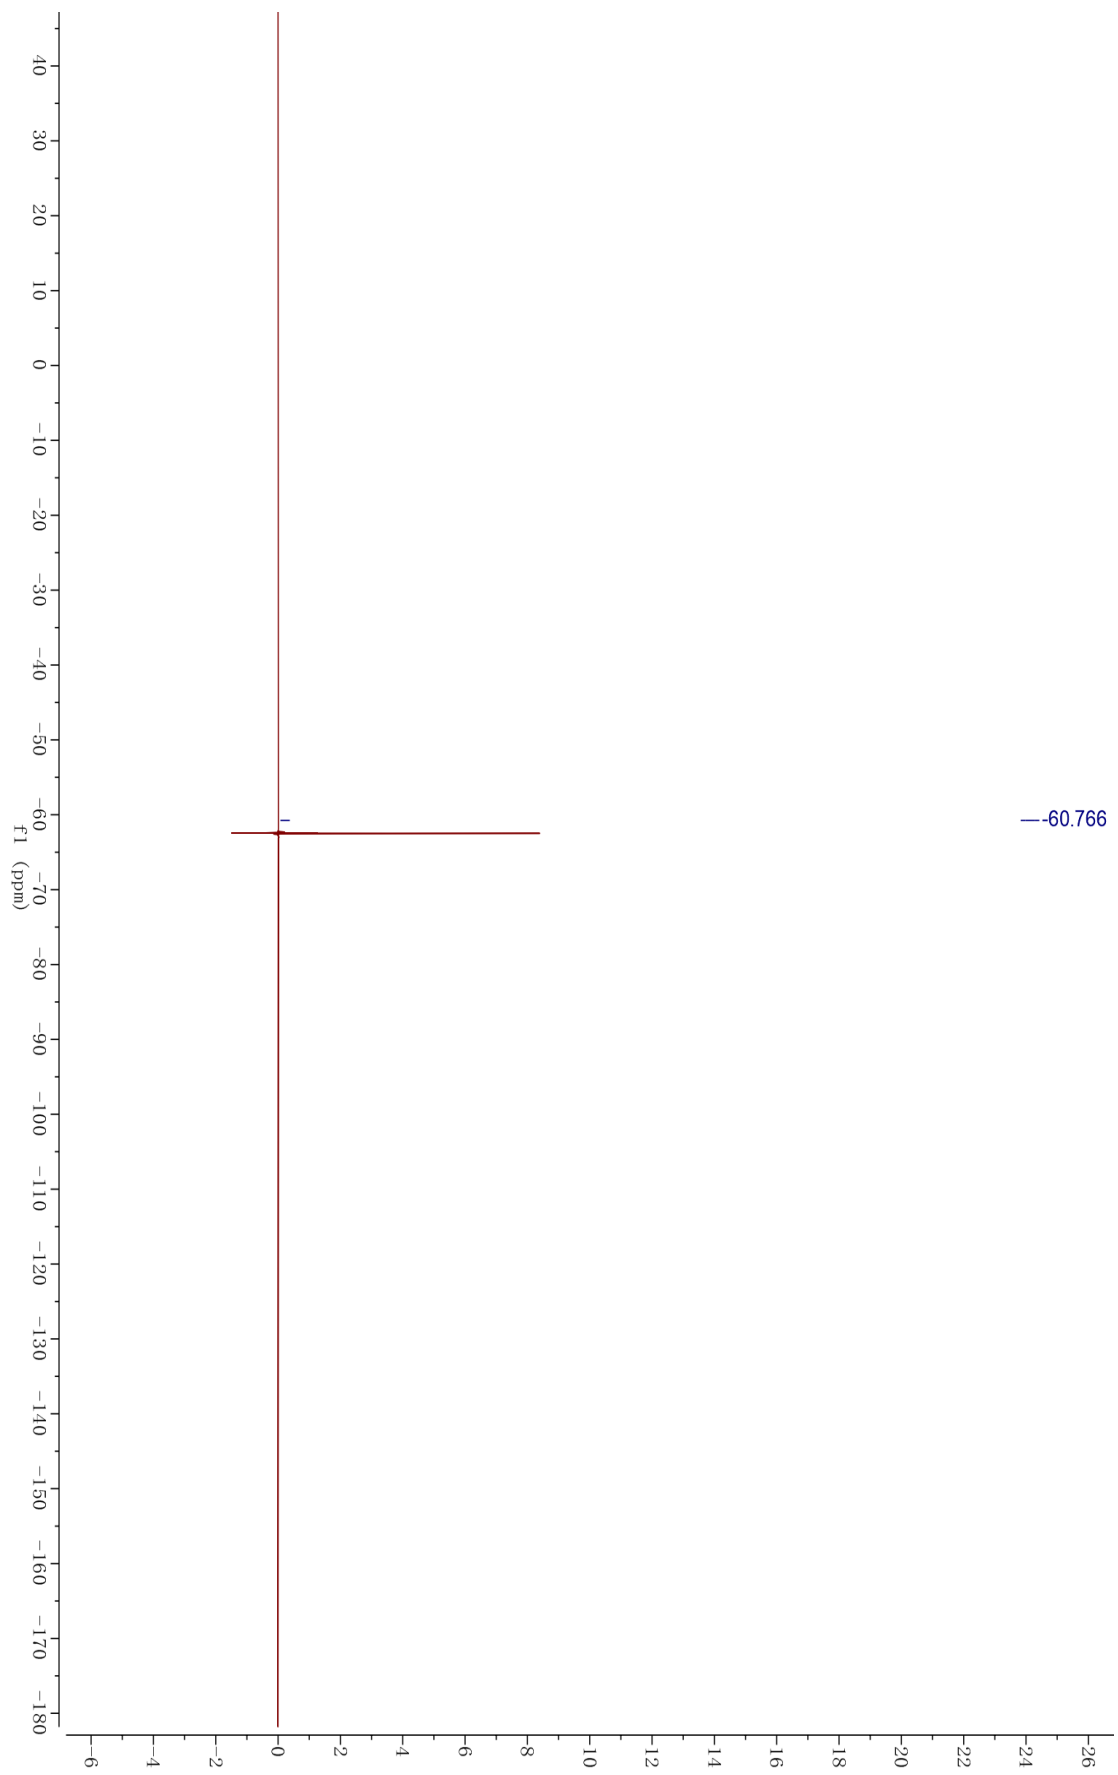



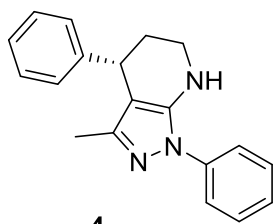

4

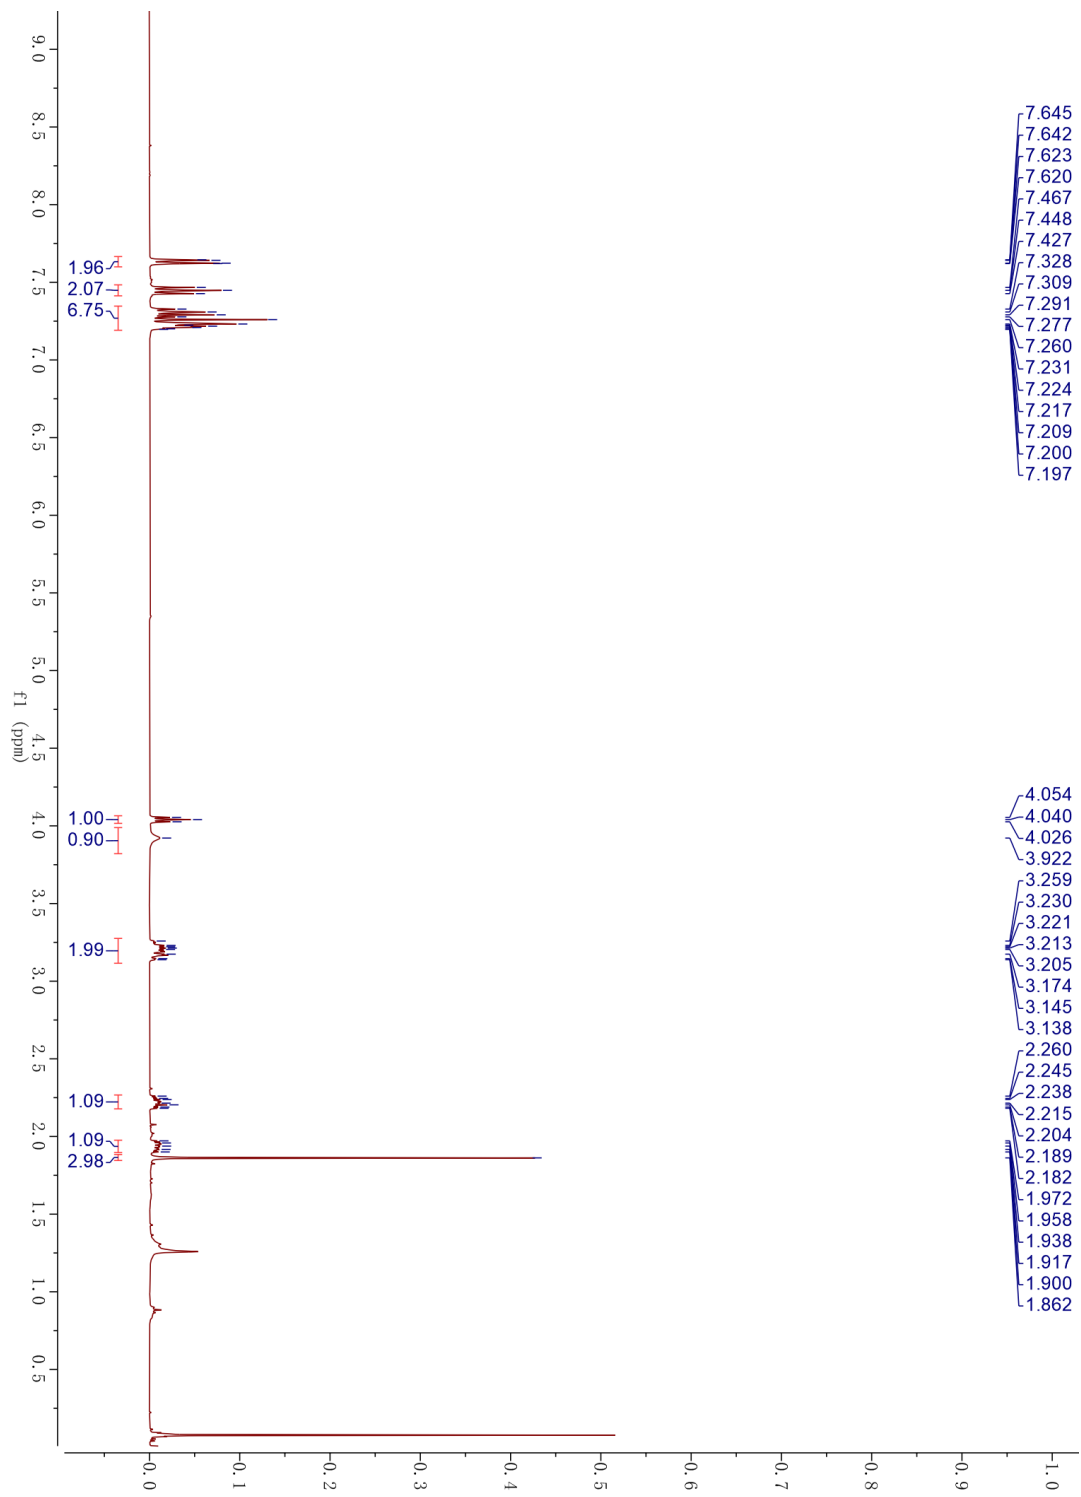

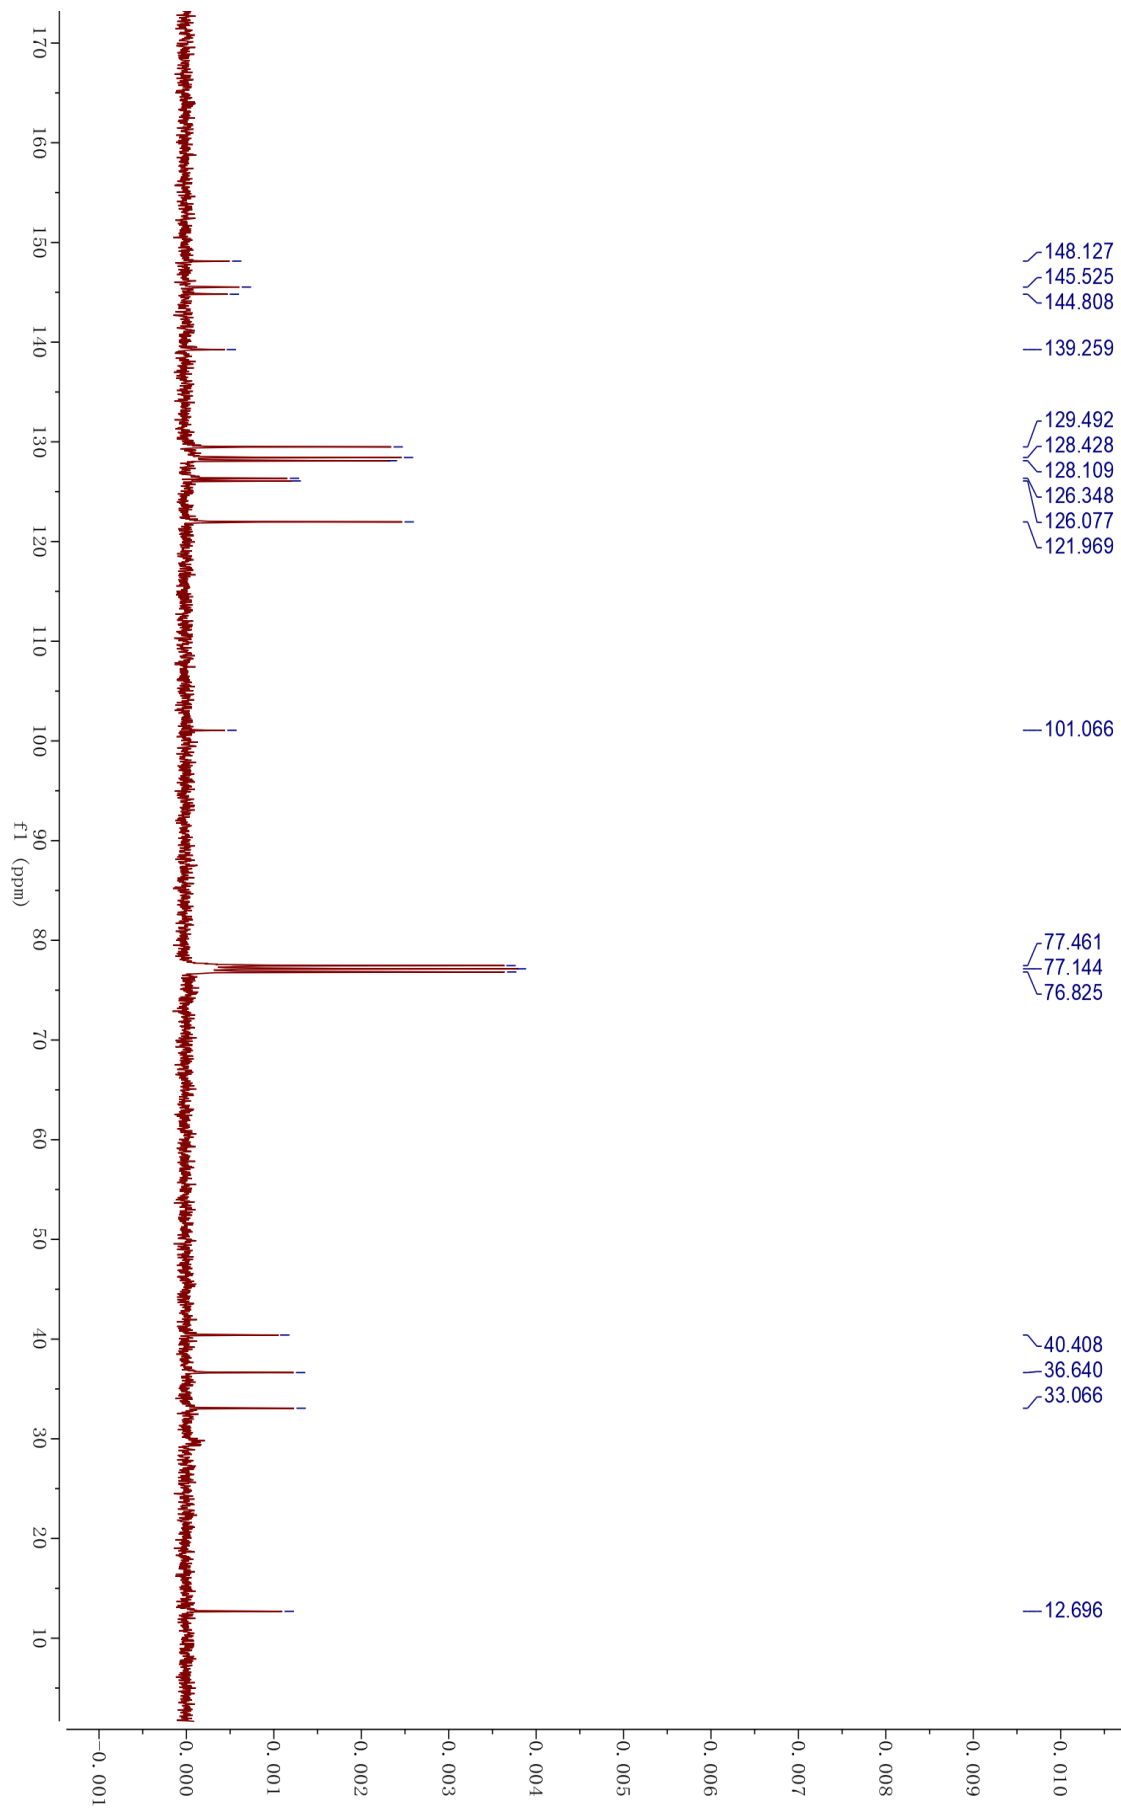

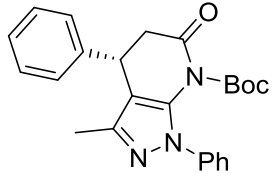

**5**

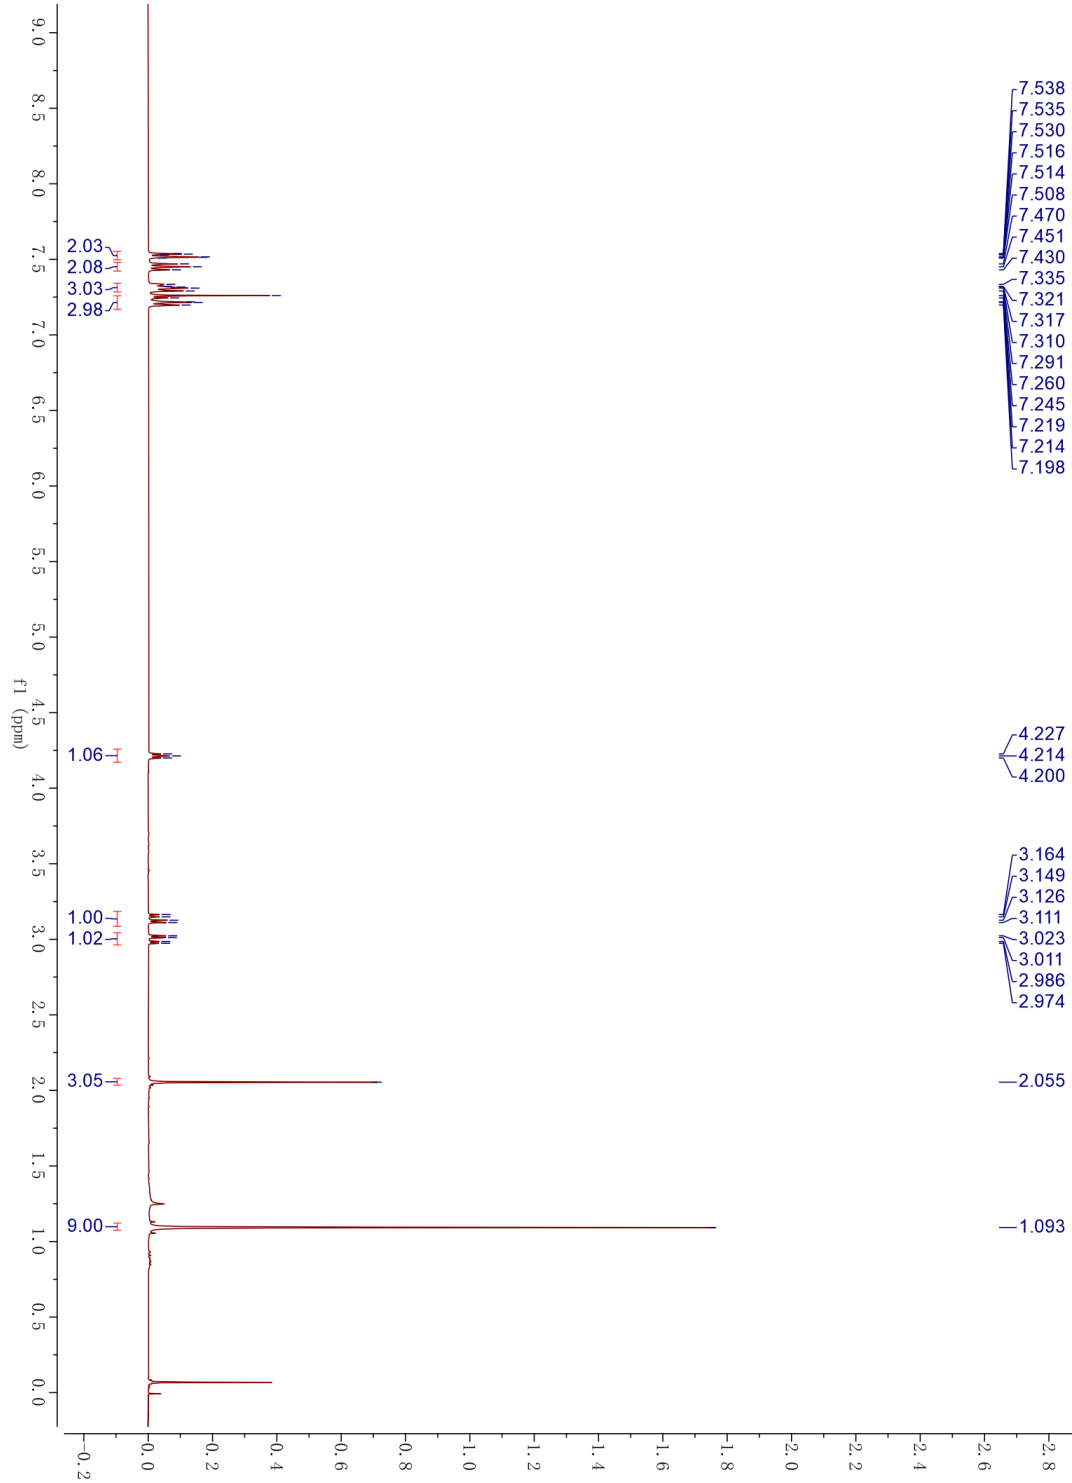

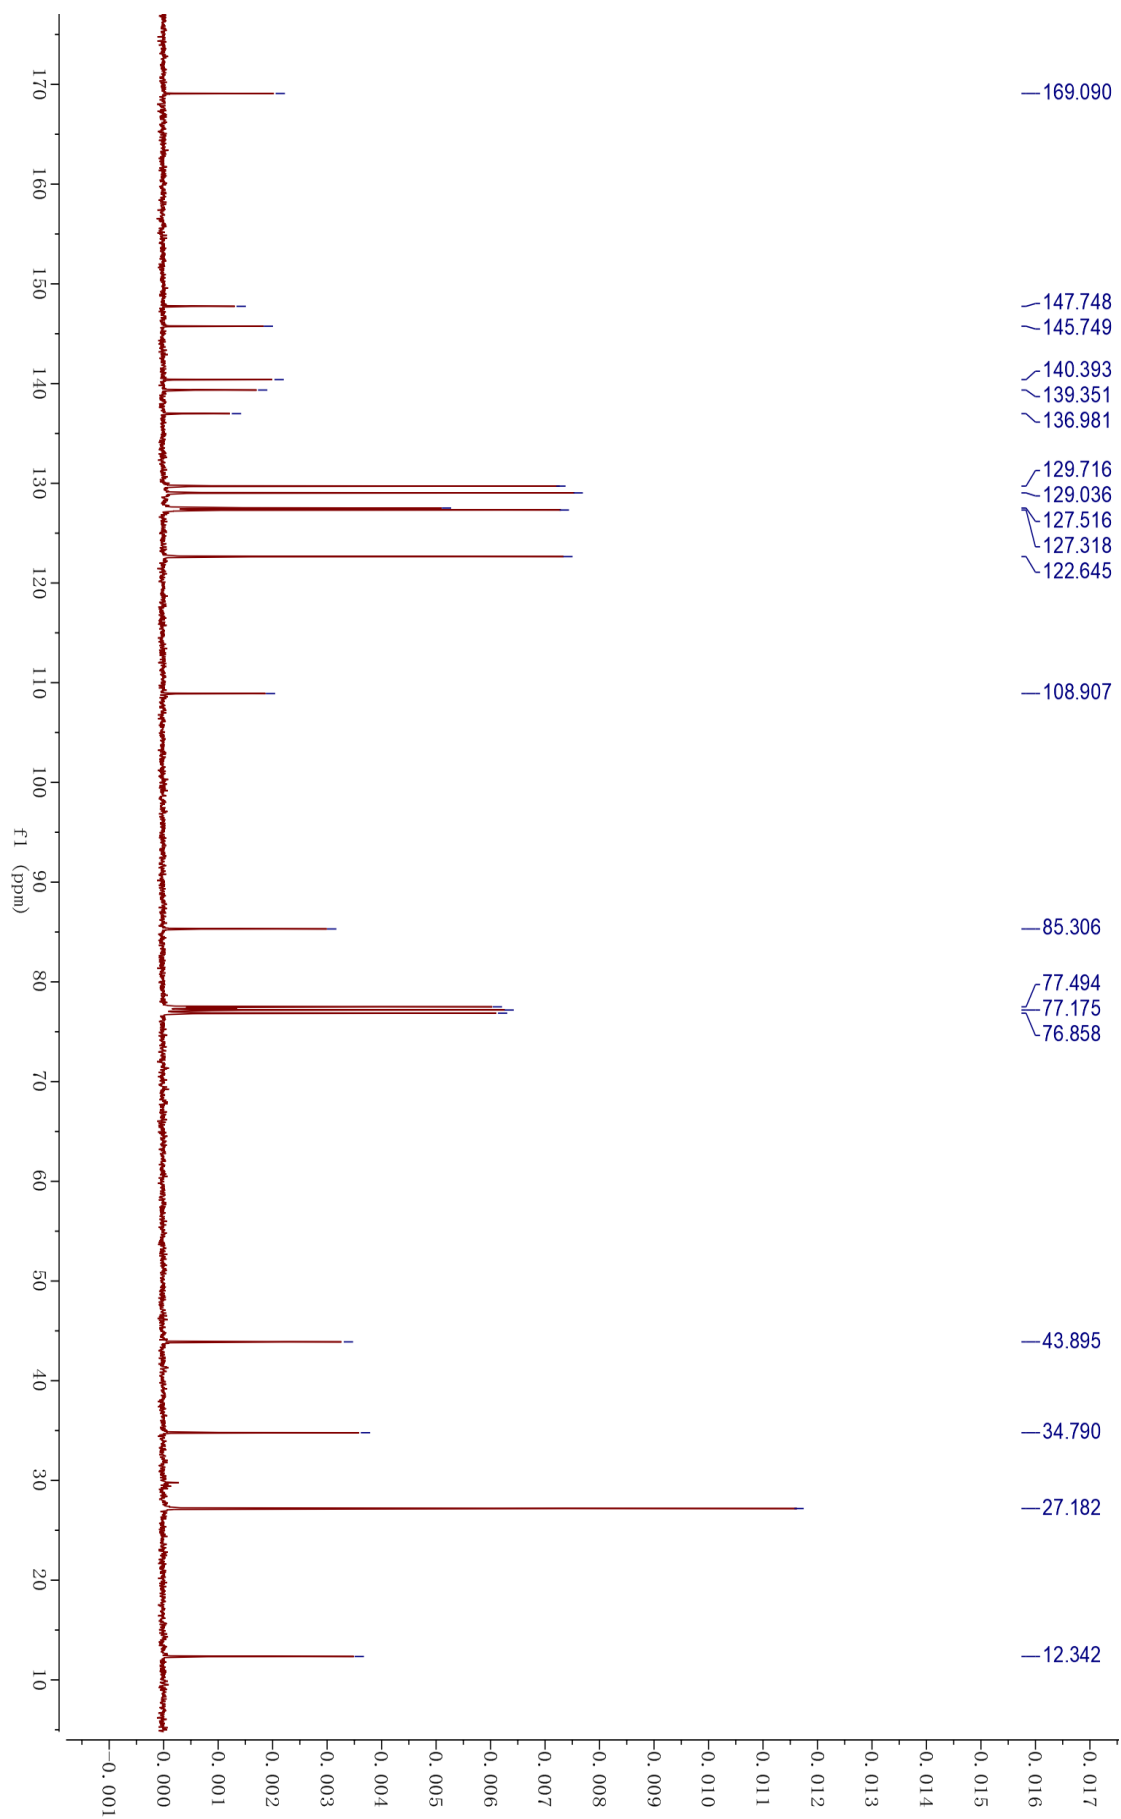

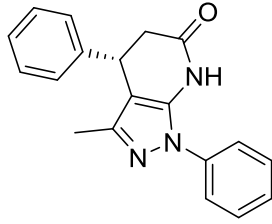

3a

<Chromatogram>

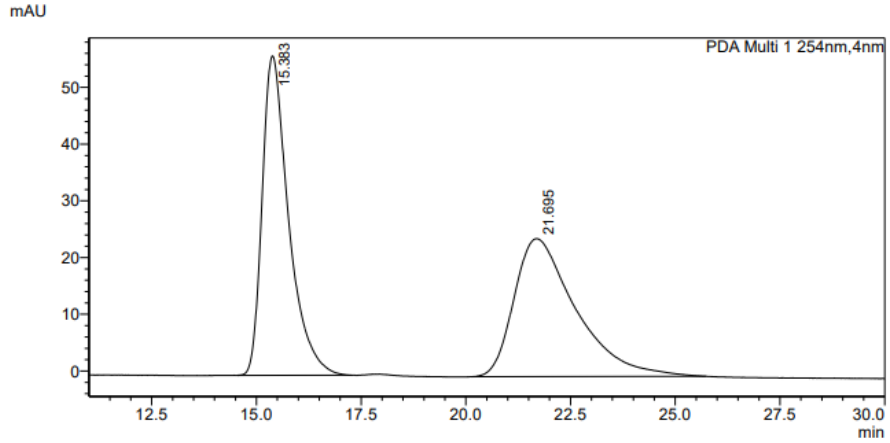

<Peak Table>

| PDA Ch1 254nm |           |         |         |        |
|---------------|-----------|---------|---------|--------|
| Peak#         | Ret. Time | Area    | Area%   | Height |
| 1             | 15.383    | 2471915 | 49.783  | 56299  |
| 2             | 21.695    | 2493509 | 50.217  | 24324  |
| Total         |           | 4965425 | 100.000 | 80623  |

<Chromatogram>

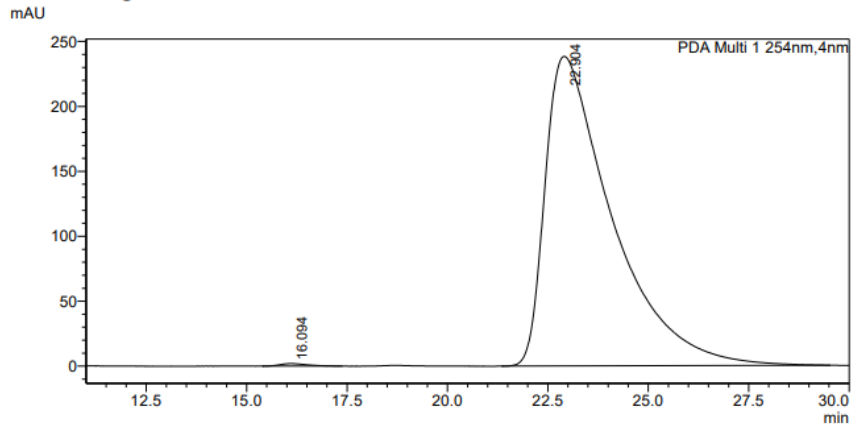

<Peak Table>

| PDA Ch1 254nm |           |          |         |        |
|---------------|-----------|----------|---------|--------|
| Peak#         | Ret. Time | Area     | Area%   | Height |
| 1             | 16.094    | 94471    | 0.340   | 1981   |
| 2             | 22.904    | 27688174 | 99.660  | 238405 |
| Total         |           | 27782645 | 100.000 | 240386 |

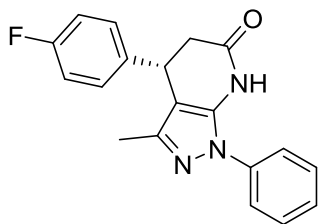

**3b**

**<Chromatogram>**

mAU

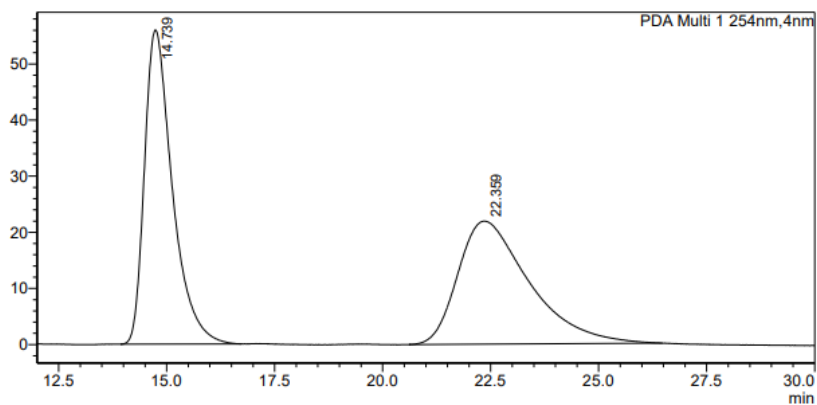

**<Peak Table>**

PDA Ch1 254nm

| Peak# | Ret. Time | Area    | Area%   | Height |
|-------|-----------|---------|---------|--------|
| 1     | 14.739    | 2514109 | 49.982  | 55977  |
| 2     | 22.359    | 2515952 | 50.018  | 21914  |
| Total |           | 5030061 | 100.000 | 77891  |

**<Chromatogram>**

mAU

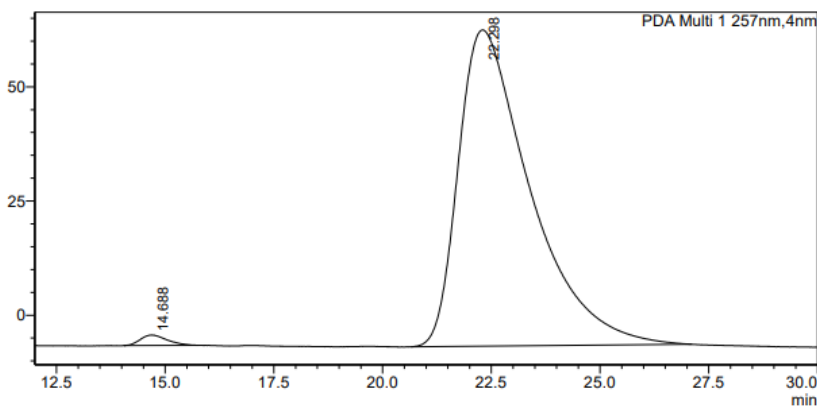

**<Peak Table>**

PDA Ch1 257nm

| Peak# | Ret. Time | Area    | Area%   | Height |
|-------|-----------|---------|---------|--------|
| 1     | 14.688    | 96848   | 1.204   | 2280   |
| 2     | 22.298    | 7947392 | 98.796  | 69199  |
| Total |           | 8044240 | 100.000 | 71479  |

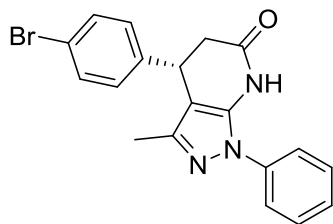

**3c**

**<Chromatogram>**

mAU

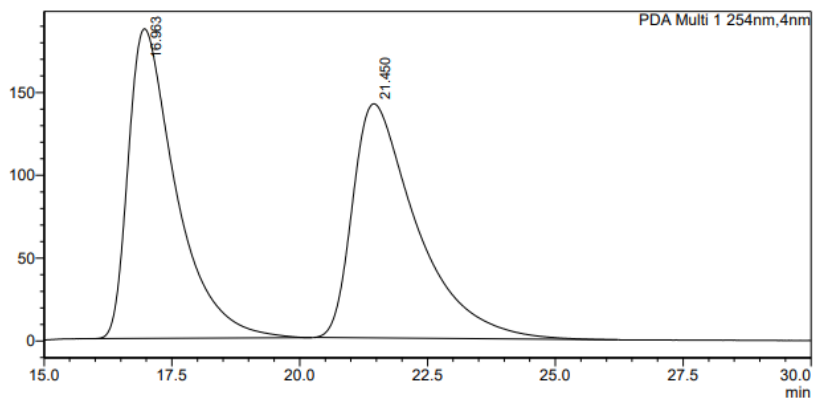

**<Peak Table>**

PDA Ch1 254nm

| Peak# | Ret. Time | Area%   | Area     | Height |
|-------|-----------|---------|----------|--------|
| 1     | 16.963    | 49.489  | 12146340 | 186873 |
| 2     | 21.450    | 50.511  | 12397413 | 141304 |
| Total |           | 100.000 | 24543753 | 328177 |

**<Chromatogram>**

mAU

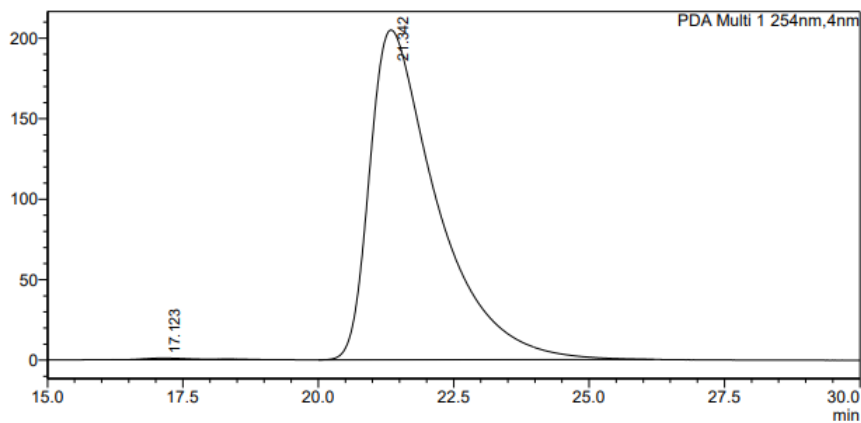

**<Peak Table>**

PDA Ch1 254nm

| Peak# | Ret. Time | Area     | Area%   | Height |
|-------|-----------|----------|---------|--------|
| 1     | 17.123    | 75932    | 0.426   | 1020   |
| 2     | 21.342    | 17729493 | 99.574  | 204849 |
| Total |           | 17805425 | 100.000 | 205869 |

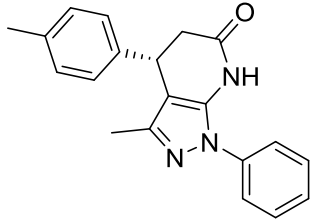

**3d**

**<Chromatogram>**

mAU

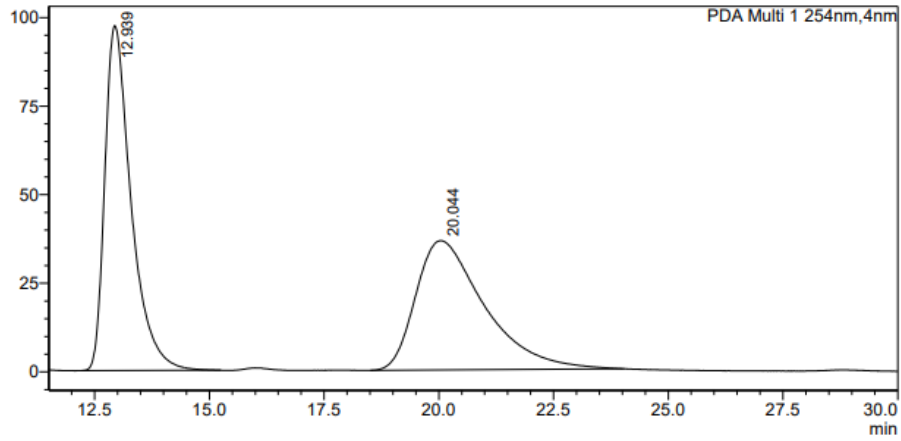

**<Peak Table>**

PDA Ch1 254nm

| Peak# | Ret. Time | Area    | Area%   | Height |
|-------|-----------|---------|---------|--------|
| 1     | 12.939    | 3882343 | 50.502  | 97327  |
| 2     | 20.044    | 3805200 | 49.498  | 36528  |
| Total |           | 7687543 | 100.000 | 133855 |

**<Chromatogram>**

mAU

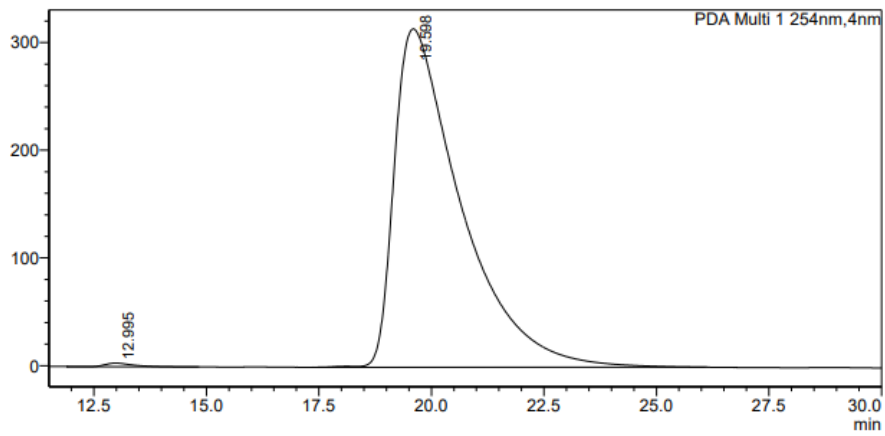

**<Peak Table>**

PDA Ch1 254nm

| Peak# | Ret. Time | Area     | Area%   | Height |
|-------|-----------|----------|---------|--------|
| 1     | 12.995    | 137234   | 0.422   | 3258   |
| 2     | 19.598    | 32408145 | 99.578  | 314129 |
| Total |           | 32545379 | 100.000 | 317387 |



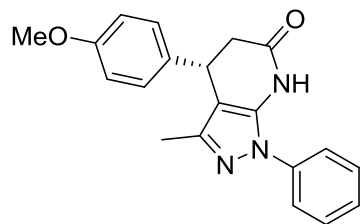

**3e**

**<Chromatogram>**

mAU

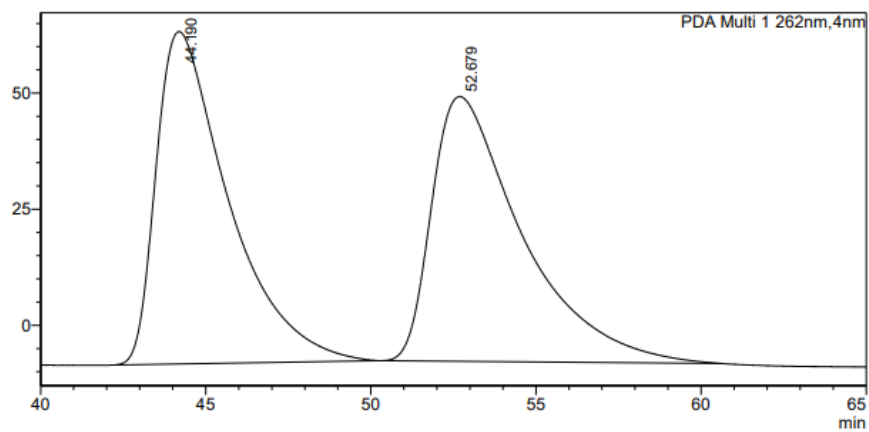

**<Peak Table>**

PDA Ch1 262nm

| Peak# | Ret. Time | Area     | Area%   | Height |
|-------|-----------|----------|---------|--------|
| 1     | 44.190    | 10883016 | 50.104  | 71574  |
| 2     | 52.679    | 10837623 | 49.896  | 56997  |
| Total |           | 21720638 | 100.000 | 128571 |

**<Chromatogram>**

mAU

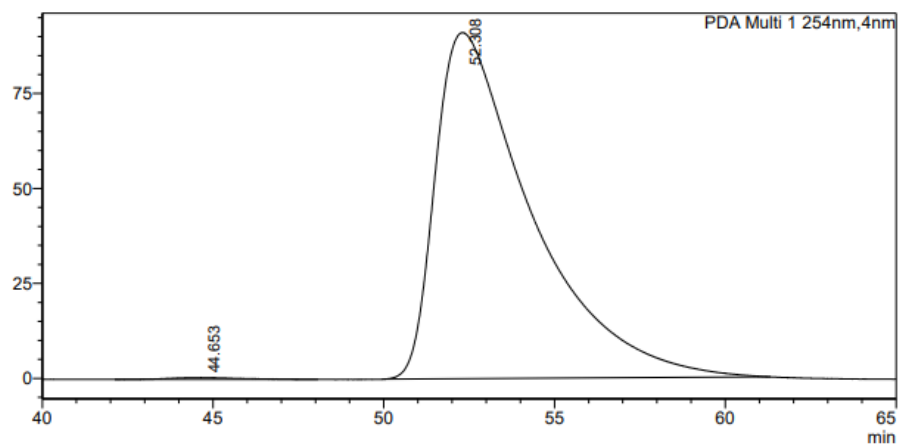

**<Peak Table>**

PDA Ch1 254nm

| Peak# | Ret. Time | Area     | Area%   | Height |
|-------|-----------|----------|---------|--------|
| 1     | 44.653    | 66577    | 0.371   | 476    |
| 2     | 52.308    | 17885868 | 99.629  | 91132  |
| Total |           | 17952445 | 100.000 | 91608  |

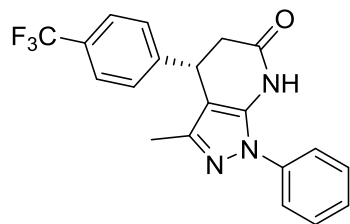

**3f**

**<Chromatogram>**

mAU

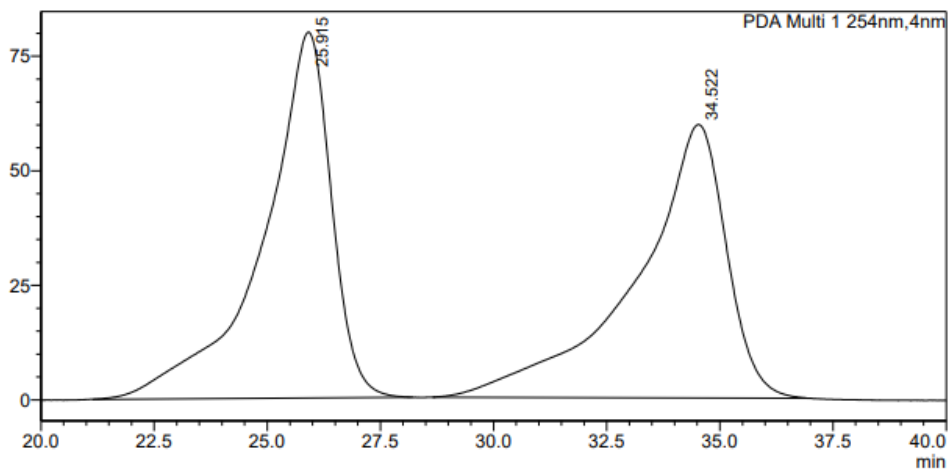

**<Peak Table>**

PDA Ch1 254nm

| Peak# | Ret. Time | Area     | Area%   | Height |
|-------|-----------|----------|---------|--------|
| 1     | 25.915    | 8403156  | 50.276  | 79829  |
| 2     | 34.522    | 8310953  | 49.724  | 59661  |
| Total |           | 16714109 | 100.000 | 139490 |

**<Chromatogram>**

mAU

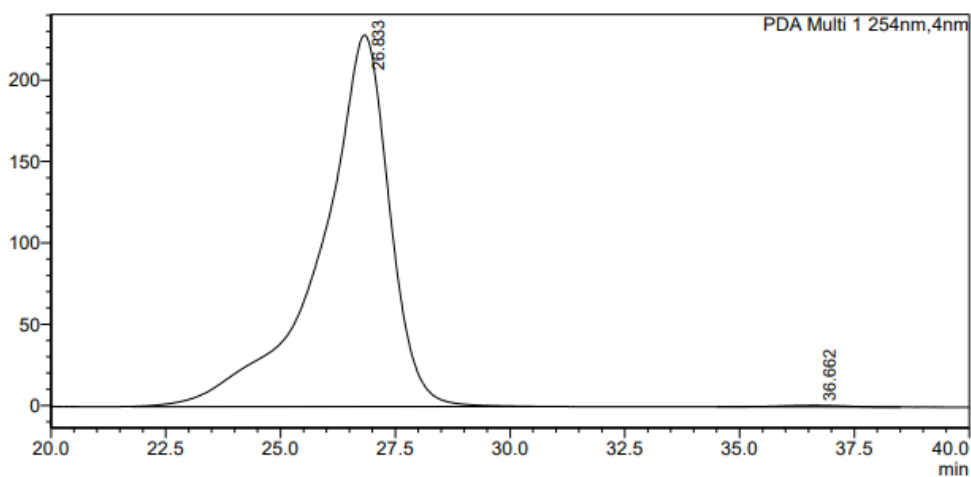

**<Peak Table>**

PDA Ch1 254nm

| Peak# | Ret. Time | Area     | Area%   | Height |
|-------|-----------|----------|---------|--------|
| 1     | 26.833    | 23945406 | 99.609  | 228249 |
| 2     | 36.662    | 94048    | 0.391   | 991    |
| Total |           | 24039454 | 100.000 | 229240 |

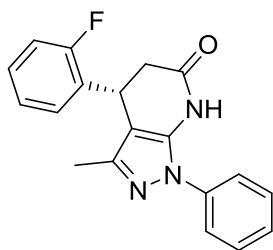

**3g**

**<Chromatogram>**

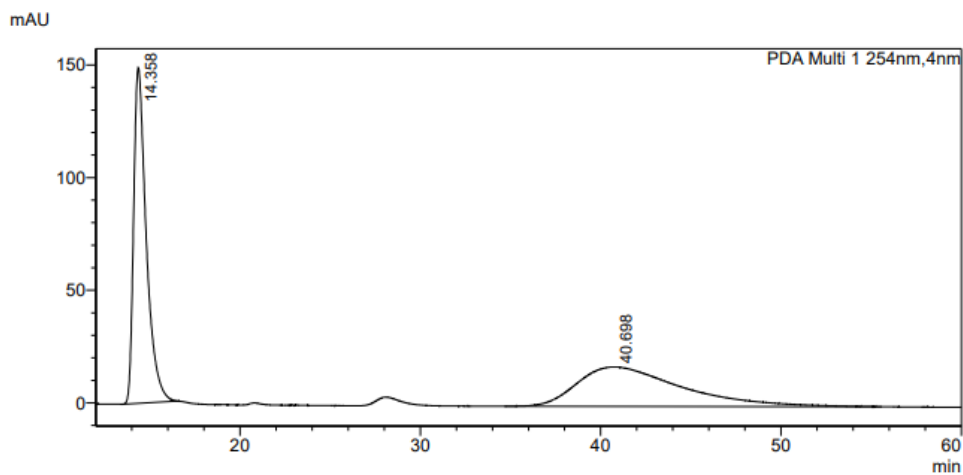

**<Peak Table>**

PDA Ch1 254nm

| Peak# | Ret. Time | Area     | Area%   | Height |
|-------|-----------|----------|---------|--------|
| 1     | 14.358    | 7248622  | 50.777  | 148941 |
| 2     | 40.698    | 7026713  | 49.223  | 17481  |
| Total |           | 14275335 | 100.000 | 166422 |

**<Chromatogram>**

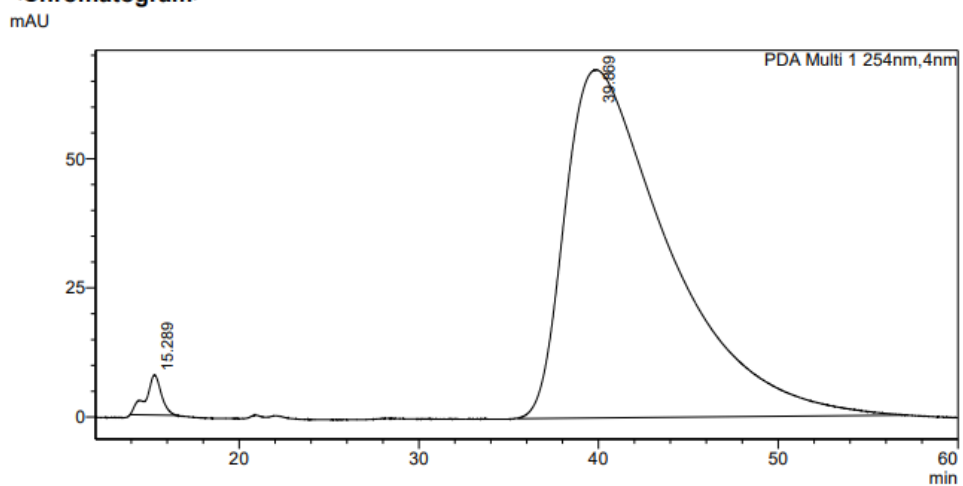

**<Peak Table>**

PDA Ch1 254nm

| Peak# | Ret. Time | Area     | Area%   | Height |
|-------|-----------|----------|---------|--------|
| 1     | 15.289    | 475230   | 1.721   | 7767   |
| 2     | 39.869    | 27145282 | 98.279  | 67381  |
| Total |           | 27620511 | 100.000 | 75148  |

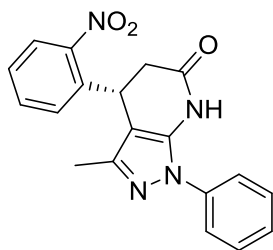

**3h**

**<Chromatogram>**

mAU

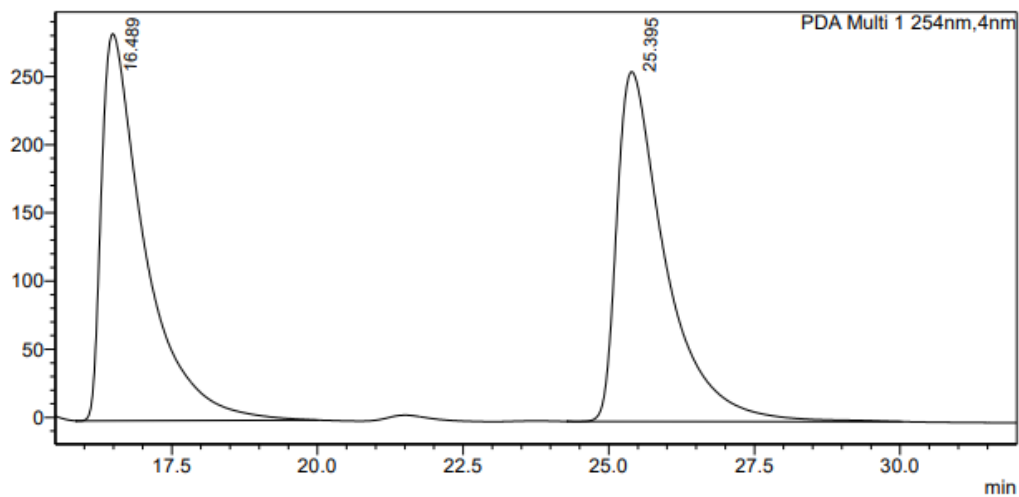

**<Peak Table>**

PDA Ch1 254nm

| Peak# | Ret. Time | Area     | Area%   | Height |
|-------|-----------|----------|---------|--------|
| 1     | 16.489    | 14625466 | 49.507  | 283737 |
| 2     | 25.395    | 14916850 | 50.493  | 256435 |
| Total |           | 29542316 | 100.000 | 540172 |

<Chromatogram>

mAU

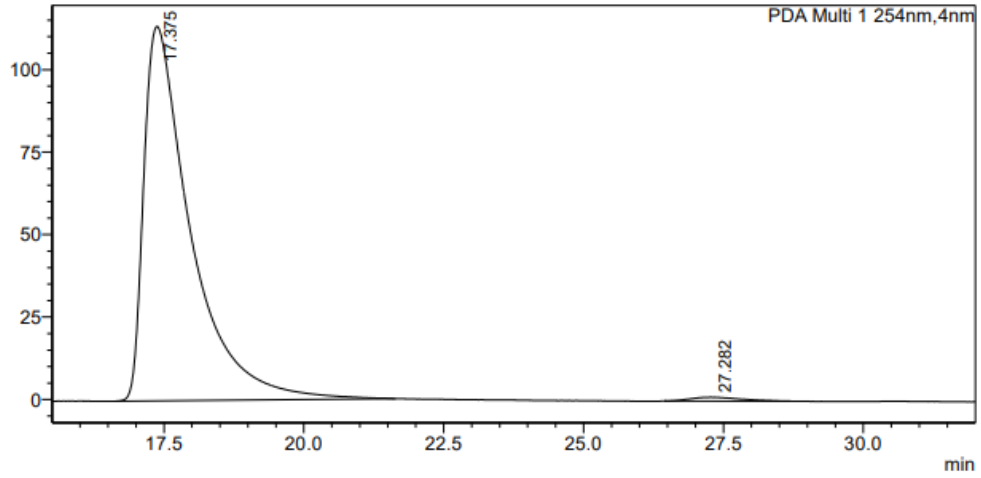

<Peak Table>

PDA Ch1 254nm

| Peak# | Ret. Time | Area    | Area%   | Height |
|-------|-----------|---------|---------|--------|
| 1     | 17.375    | 6589700 | 98.915  | 113478 |
| 2     | 27.282    | 72268   | 1.085   | 1165   |
| Total |           | 6661968 | 100.000 | 114643 |

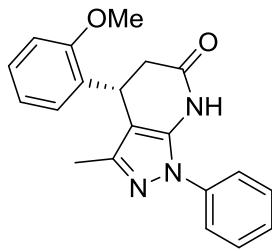

3i

<Chromatogram>

mAU

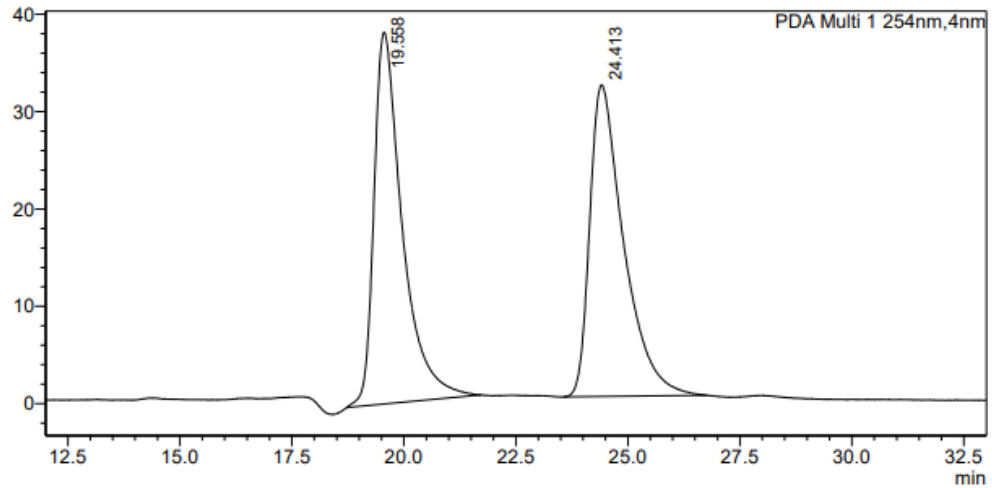

<Peak Table>

PDA Ch1 254nm

| Peak# | Ret. Time | Area    | Area%   | Height |
|-------|-----------|---------|---------|--------|
| 1     | 19.558    | 1680318 | 49.927  | 38168  |
| 2     | 24.413    | 1685223 | 50.073  | 31994  |
| Total |           | 3365541 | 100.000 | 70161  |

<Chromatogram>

mAU

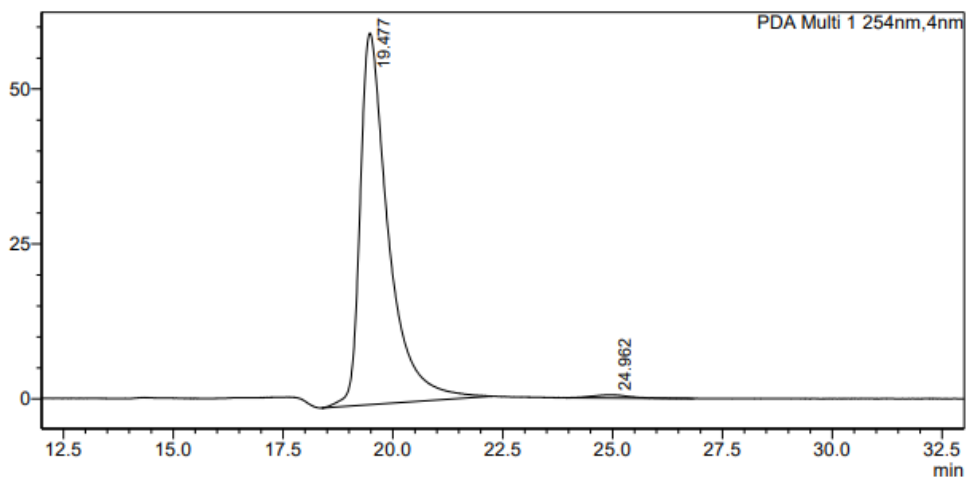

<Peak Table>

PDA Ch1 254nm

| Peak# | Ret. Time | Area    | Area%   | Height |
|-------|-----------|---------|---------|--------|
| 1     | 19.477    | 2691159 | 98.923  | 59938  |
| 2     | 24.962    | 29312   | 1.077   | 504    |
| Total |           | 2720470 | 100.000 | 60442  |

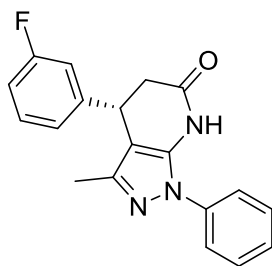

3j

<Chromatogram>

mAU

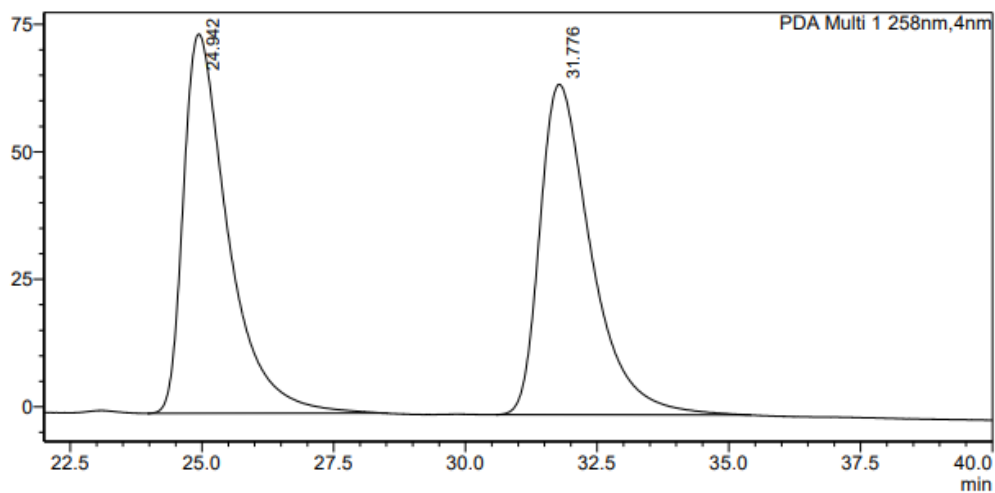

<Peak Table>

PDA Ch1 258nm

| Peak# | Ret. Time | Area    | Area%   | Height |
|-------|-----------|---------|---------|--------|
| 1     | 24.942    | 4395929 | 49.932  | 74365  |
| 2     | 31.776    | 4407868 | 50.068  | 64790  |
| Total |           | 8803797 | 100.000 | 139155 |

<Chromatogram>

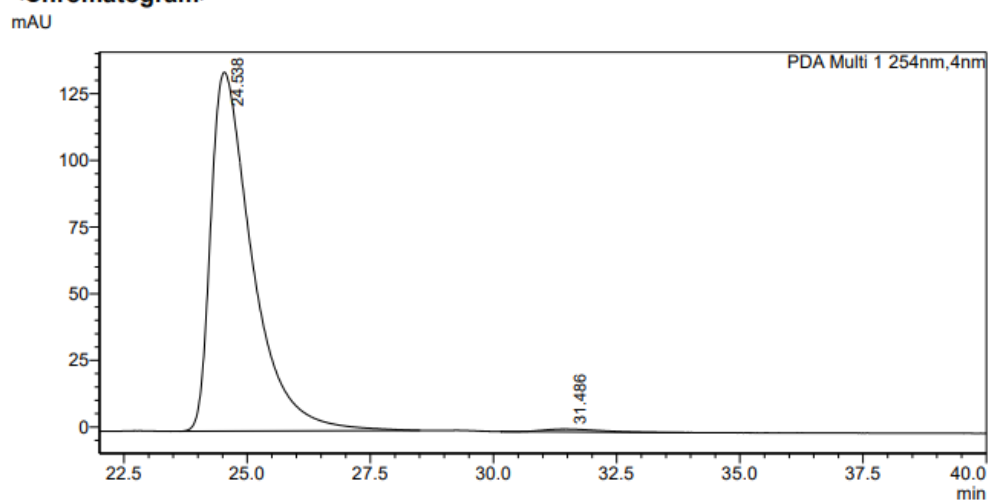

<Peak Table>

PDA Ch1 254nm

| Peak# | Ret. Time | Area    | Area%   | Height |
|-------|-----------|---------|---------|--------|
| 1     | 24.538    | 7893799 | 98.953  | 134576 |
| 2     | 31.486    | 83484   | 1.047   | 1062   |
| Total |           | 7977283 | 100.000 | 135638 |

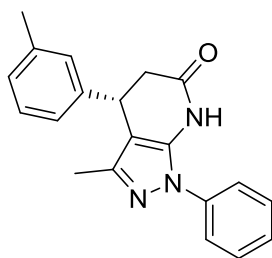

3k

<Chromatogram>

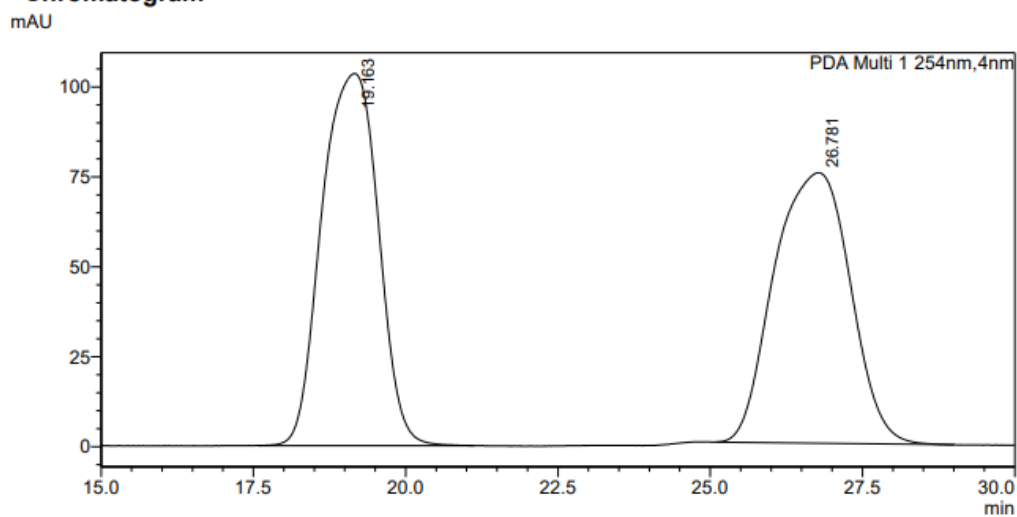

<Peak Table>

PDA Ch1 254nm

| Peak# | Ret. Time | Area     | Area%   | Height |
|-------|-----------|----------|---------|--------|
| 1     | 19.163    | 6685476  | 50.533  | 103400 |
| 2     | 26.781    | 6544525  | 49.467  | 75170  |
| Total |           | 13230001 | 100.000 | 178570 |

### <Chromatogram>

mAU

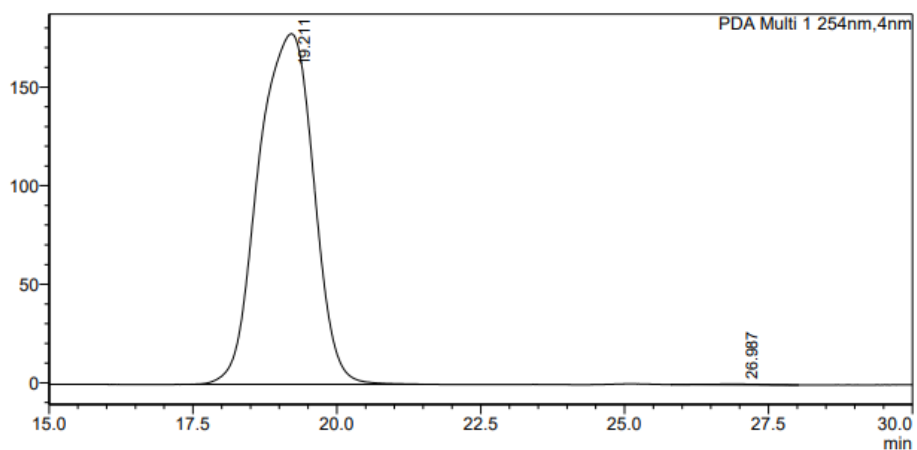

### <Peak Table>

PDA Ch1 254nm

| Peak# | Ret. Time | Area     | Area%   | Height |
|-------|-----------|----------|---------|--------|
| 1     | 19.211    | 11848568 | 99.831  | 177785 |
| 2     | 26.987    | 20116    | 0.169   | 331    |
| Total |           | 11868684 | 100.000 | 178116 |

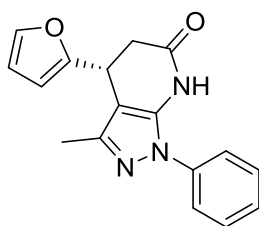

31

### <Chromatogram>

mAU

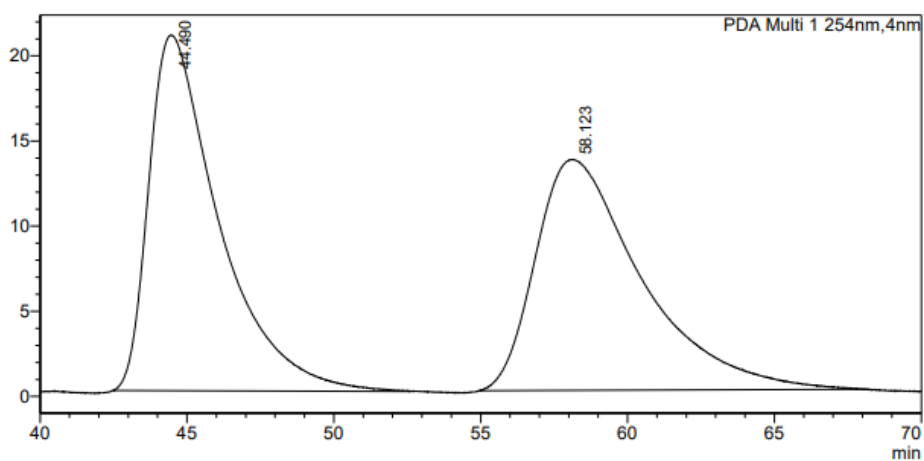

### <Peak Table>

PDA Ch1 254nm

| Peak# | Ret. Time | Area    | Area%   | Height |
|-------|-----------|---------|---------|--------|
| 1     | 44.490    | 3460612 | 50.346  | 20882  |
| 2     | 58.123    | 3413061 | 49.654  | 13567  |
| Total |           | 6873674 | 100.000 | 34449  |



### <Chromatogram>

mAU

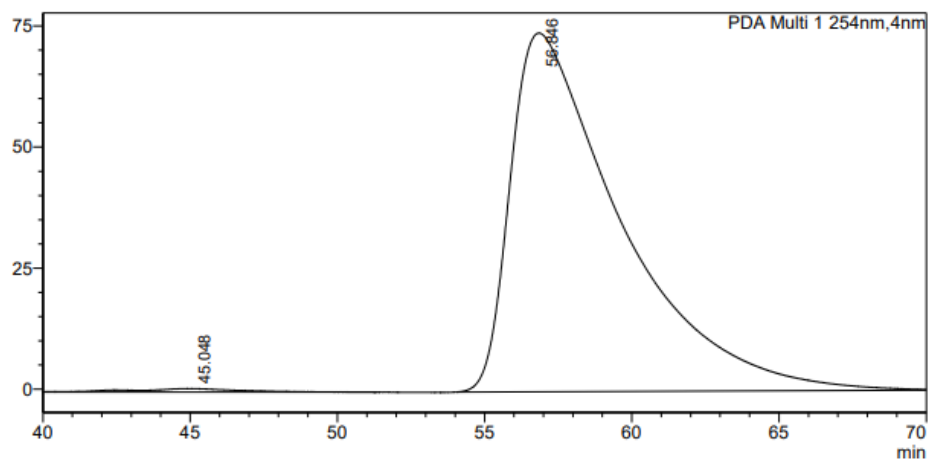

### <Peak Table>

PDA Ch1 254nm

| Peak# | Ret. Time | Area     | Area%   | Height |
|-------|-----------|----------|---------|--------|
| 1     | 45.048    | 201696   | 1.034   | 750    |
| 2     | 56.846    | 19304300 | 98.966  | 74045  |
| Total |           | 19505996 | 100.000 | 74796  |

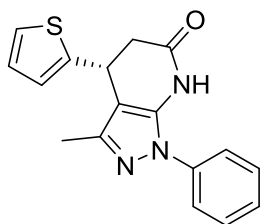

3m

### <Chromatogram>

mAU

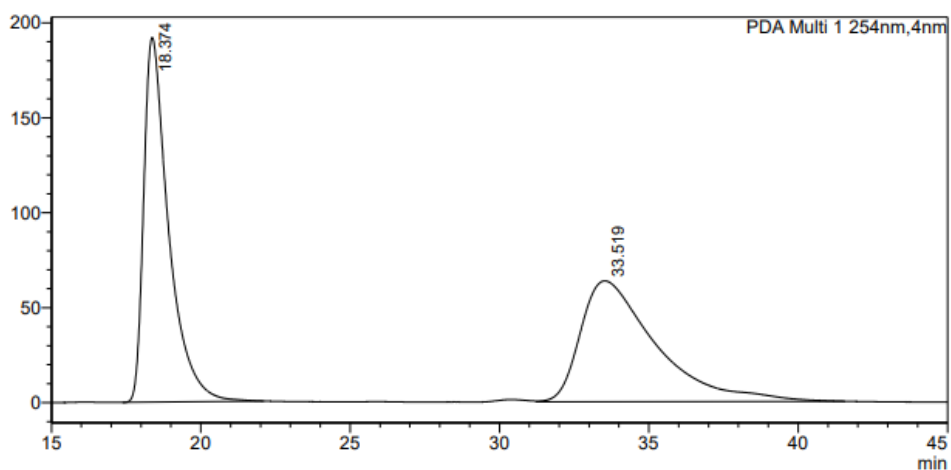

### <Peak Table>

PDA Ch1 254nm

| Peak# | Ret. Time | Area     | Area%   | Height |
|-------|-----------|----------|---------|--------|
| 1     | 18.374    | 11137937 | 49.901  | 191963 |
| 2     | 33.519    | 11182185 | 50.099  | 63653  |
| Total |           | 22320122 | 100.000 | 255616 |

### <Chromatogram>

mAU

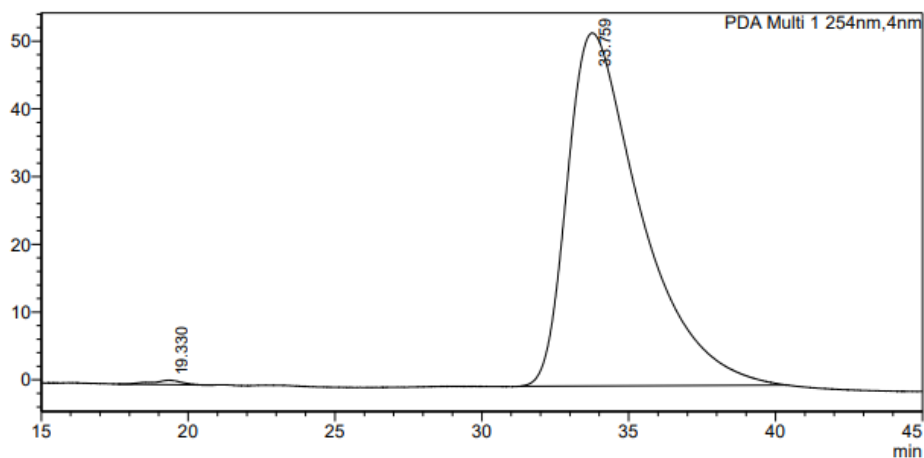

### <Peak Table>

PDA Ch1 254nm

| Peak# | Ret. Time | Area    | Area%   | Height |
|-------|-----------|---------|---------|--------|
| 1     | 19.330    | 45994   | 0.504   | 666    |
| 2     | 33.759    | 9077089 | 99.496  | 52107  |
| Total |           | 9123083 | 100.000 | 52772  |

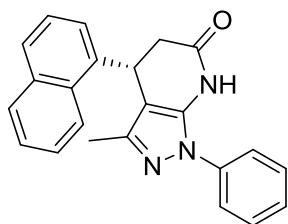

3n

### <Chromatogram>

mAU

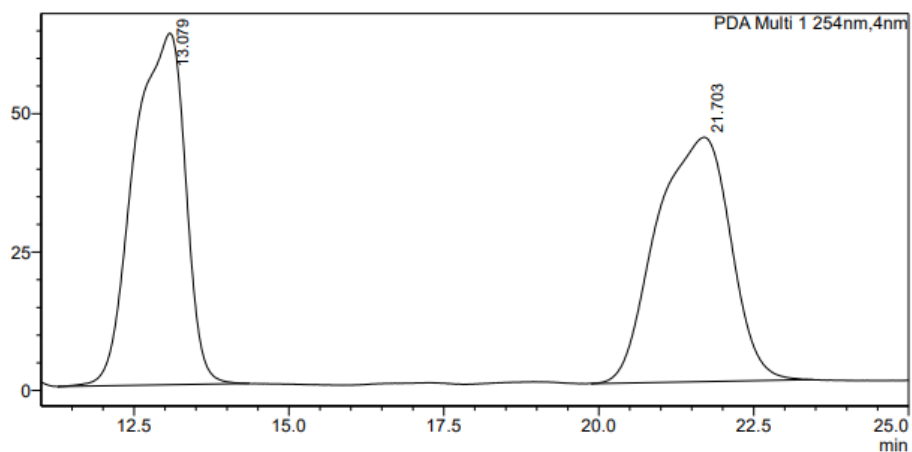

### <Peak Table>

PDA Ch1 254nm

| Peak# | Ret. Time | Area    | Area%   | Height |
|-------|-----------|---------|---------|--------|
| 1     | 13.079    | 3668116 | 50.005  | 63530  |
| 2     | 21.703    | 3667389 | 49.995  | 44155  |
| Total |           | 7335505 | 100.000 | 107685 |

<Chromatogram>

mAU

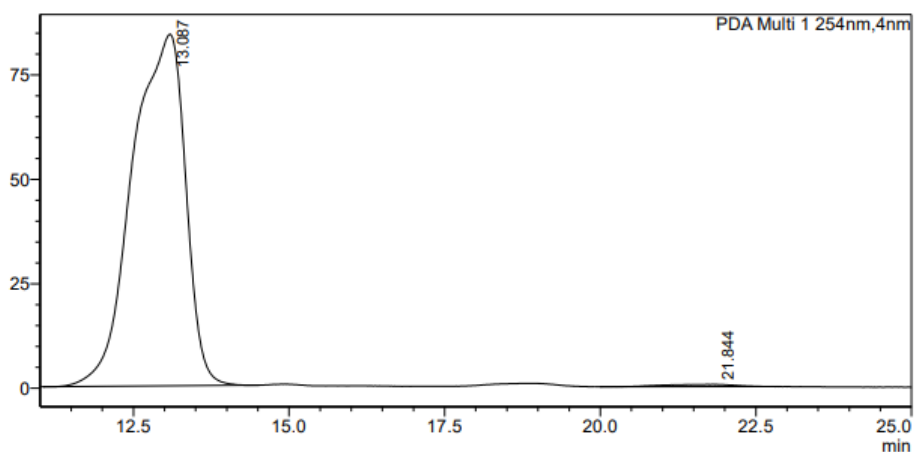

<Peak Table>

PDA Ch1 254nm

| Peak# | Ret. Time | Area    | Area%   | Height |
|-------|-----------|---------|---------|--------|
| 1     | 13.087    | 4992892 | 99.117  | 84204  |
| 2     | 21.844    | 44481   | 0.883   | 539    |
| Total |           | 5037373 | 100.000 | 84743  |

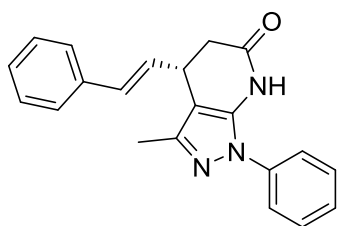

3o

<Chromatogram>

mAU

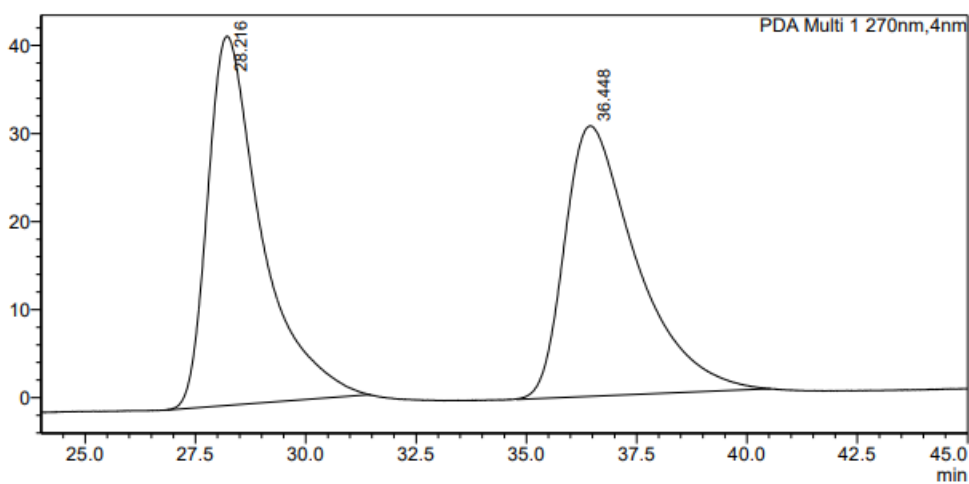

<Peak Table>

PDA Ch1 270nm

| Peak# | Ret. Time | Area    | Area%   | Height |
|-------|-----------|---------|---------|--------|
| 1     | 28.216    | 3557125 | 50.490  | 41927  |
| 2     | 36.448    | 3488036 | 49.510  | 30709  |
| Total |           | 7045161 | 100.000 | 72636  |

<Chromatogram>

mAU

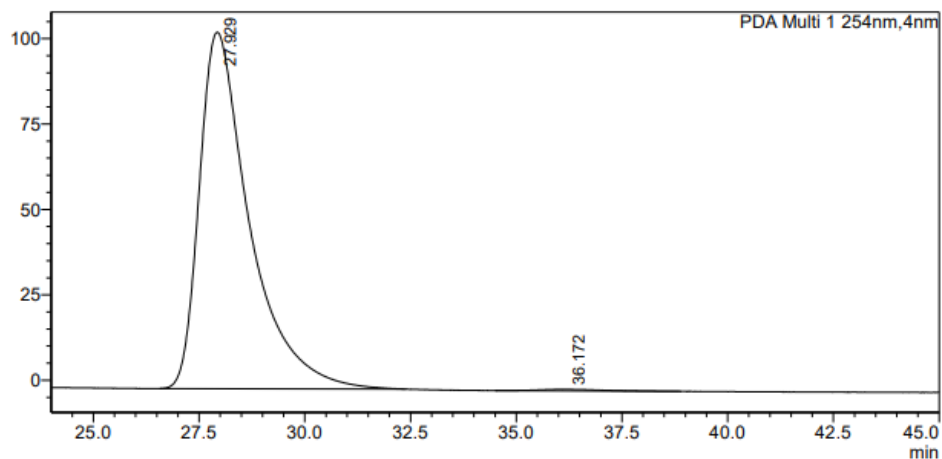

<Peak Table>

PDA Ch1 254nm

| Peak# | Ret. Time | Area    | Area%   | Height |
|-------|-----------|---------|---------|--------|
| 1     | 27.929    | 8611178 | 99.474  | 104344 |
| 2     | 36.172    | 45541   | 0.526   | 446    |
| Total |           | 8656719 | 100.000 | 104790 |

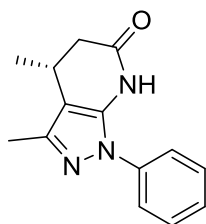

3p

<Chromatogram>

mAU

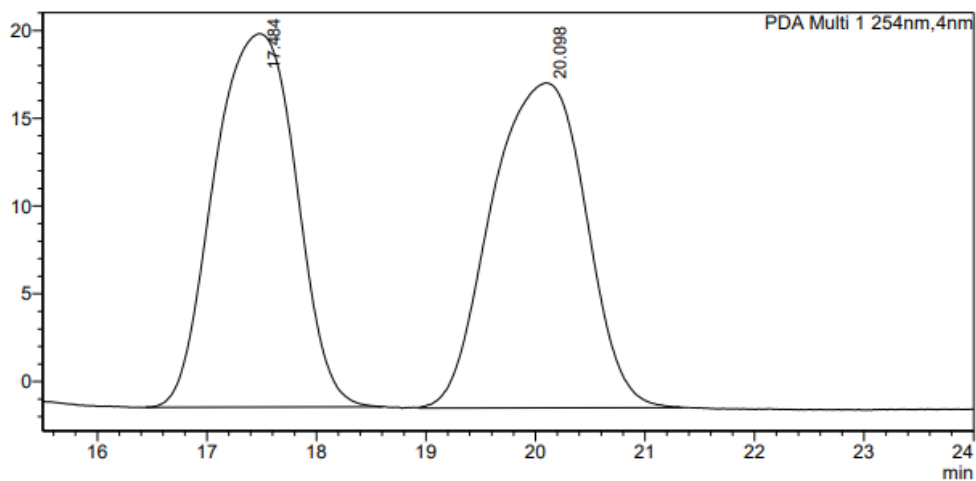

<Peak Table>

PDA Ch1 254nm

| Peak# | Ret. Time | Area    | Area%   | Height |
|-------|-----------|---------|---------|--------|
| 1     | 17.484    | 1108603 | 49.950  | 21268  |
| 2     | 20.098    | 1110828 | 50.050  | 18512  |
| Total |           | 2219430 | 100.000 | 39780  |

### <Chromatogram>

mAU

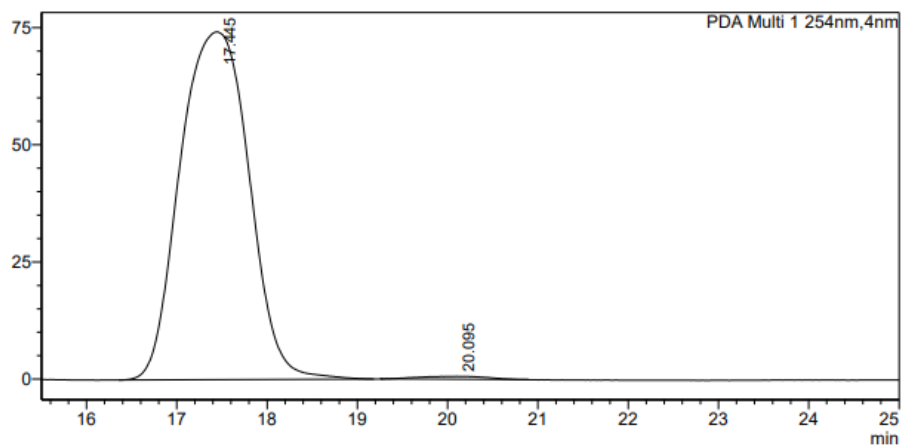

### <Peak Table>

PDA Ch1 254nm

| Peak# | Ret. Time | Area    | Area%   | Height |
|-------|-----------|---------|---------|--------|
| 1     | 17.445    | 3944562 | 99.159  | 74159  |
| 2     | 20.095    | 33461   | 0.841   | 631    |
| Total |           | 3978024 | 100.000 | 74790  |

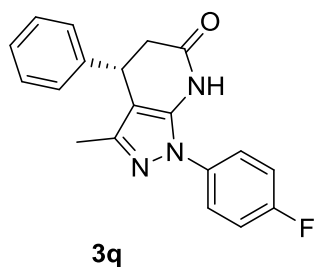

### <Chromatogram>

mAU

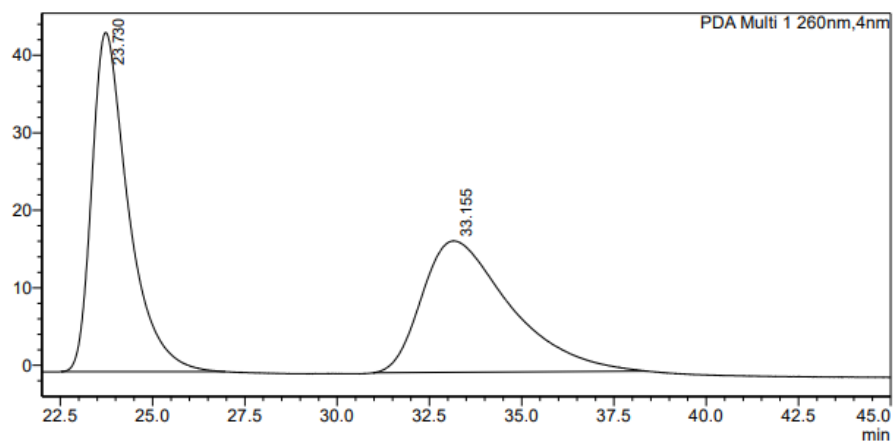

### <Peak Table>

PDA Ch1 260nm

| Peak# | Ret. Time | Area    | Area%   | Height |
|-------|-----------|---------|---------|--------|
| 1     | 23.730    | 3020014 | 51.718  | 43749  |
| 2     | 33.155    | 2819360 | 48.282  | 16965  |
| Total |           | 5839375 | 100.000 | 60714  |

### <Chromatogram>

mAU

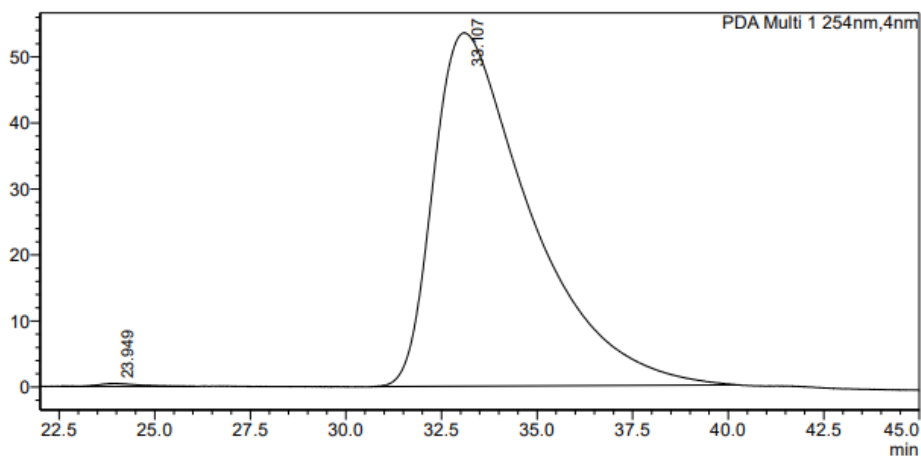

### <Peak Table>

PDA Ch1 254nm

| Peak# | Ret. Time | Area    | Area%   | Height |
|-------|-----------|---------|---------|--------|
| 1     | 23.949    | 29528   | 0.311   | 432    |
| 2     | 33.107    | 9455836 | 99.689  | 53514  |
| Total |           | 9485364 | 100.000 | 53946  |

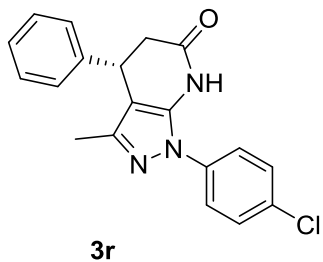

### <Chromatogram>

mAU

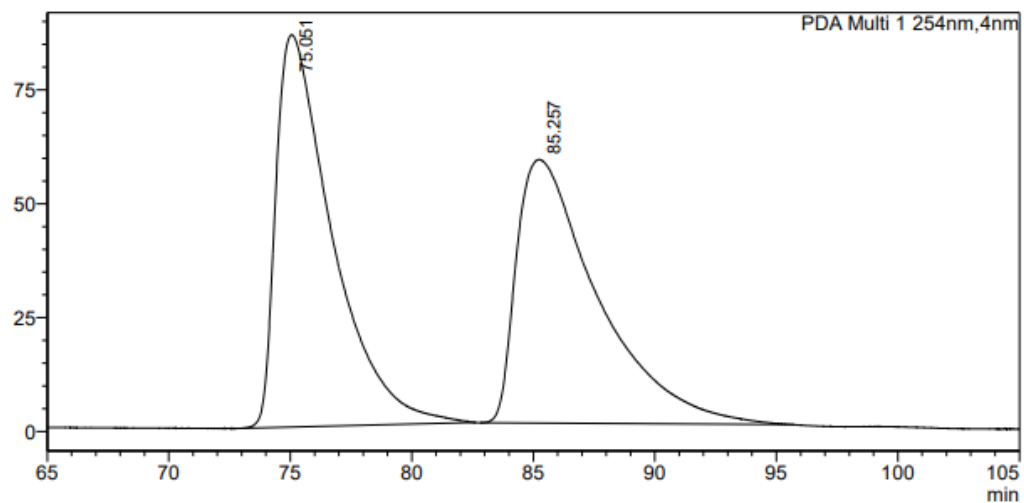

### <Peak Table>

PDA Ch1 254nm

| Peak# | Ret. Time | Area     | Area%   | Height |
|-------|-----------|----------|---------|--------|
| 1     | 75.051    | 13844279 | 50.679  | 86099  |
| 2     | 85.257    | 13473499 | 49.321  | 57850  |
| Total |           | 27317778 | 100.000 | 143949 |

<Chromatogram>

mAU

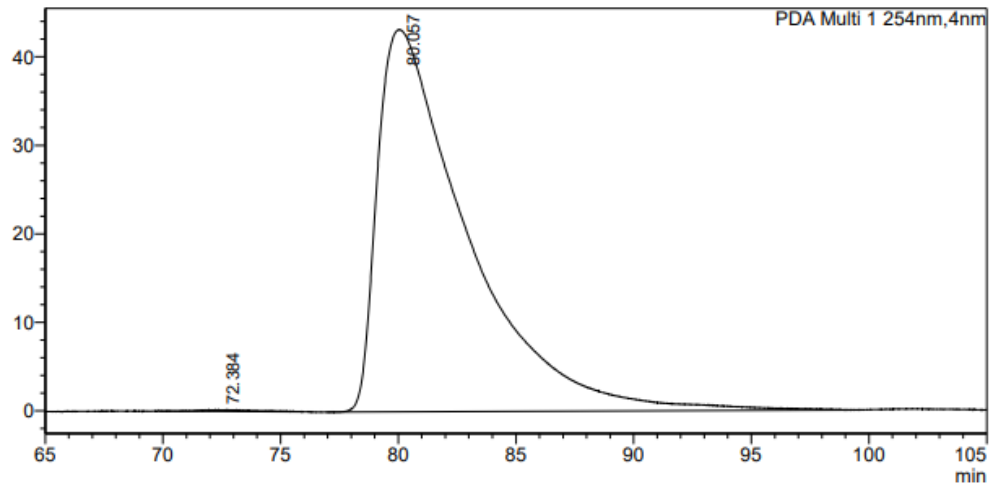

<Peak Table>

PDA Ch1 254nm

| Peak# | Ret. Time | Area     | Area%   | Height |
|-------|-----------|----------|---------|--------|
| 1     | 72.384    | 31333    | 0.272   | 180    |
| 2     | 80.057    | 11496837 | 99.728  | 43160  |
| Total |           | 11528170 | 100.000 | 43340  |

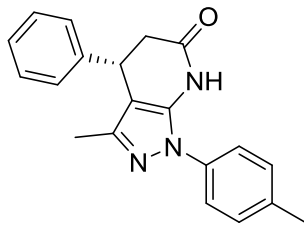

3s

<Chromatogram>

mAU

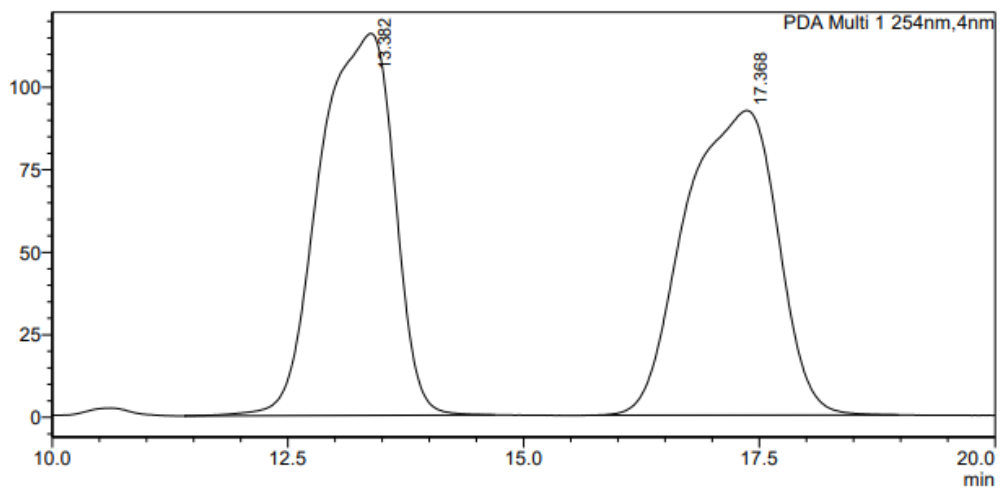

<Peak Table>

PDA Ch1 254nm

| Peak# | Ret. Time | Area     | Area%   | Height |
|-------|-----------|----------|---------|--------|
| 1     | 13.382    | 6357659  | 50.202  | 115690 |
| 2     | 17.368    | 6306450  | 49.798  | 92309  |
| Total |           | 12664109 | 100.000 | 207999 |

<Chromatogram>

mAU

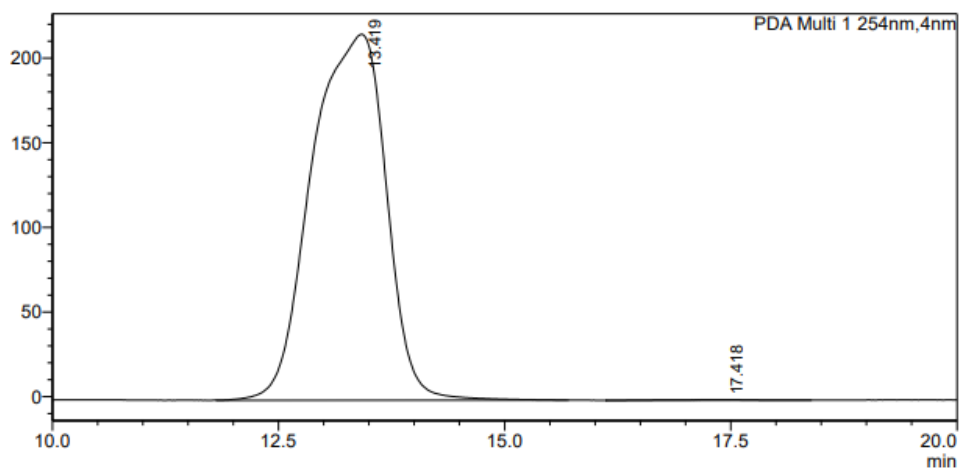

<Peak Table>

PDA Ch1 254nm

| Peak# | Ret. Time | Area     | Area%   | Height |
|-------|-----------|----------|---------|--------|
| 1     | 13.419    | 12367851 | 99.817  | 216289 |
| 2     | 17.418    | 22701    | 0.183   | 376    |
| Total |           | 12390552 | 100.000 | 216665 |

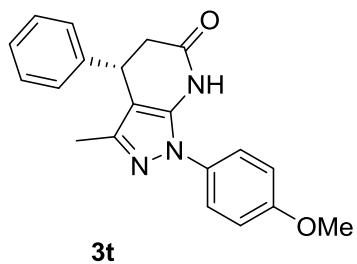

<Chromatogram>

mAU

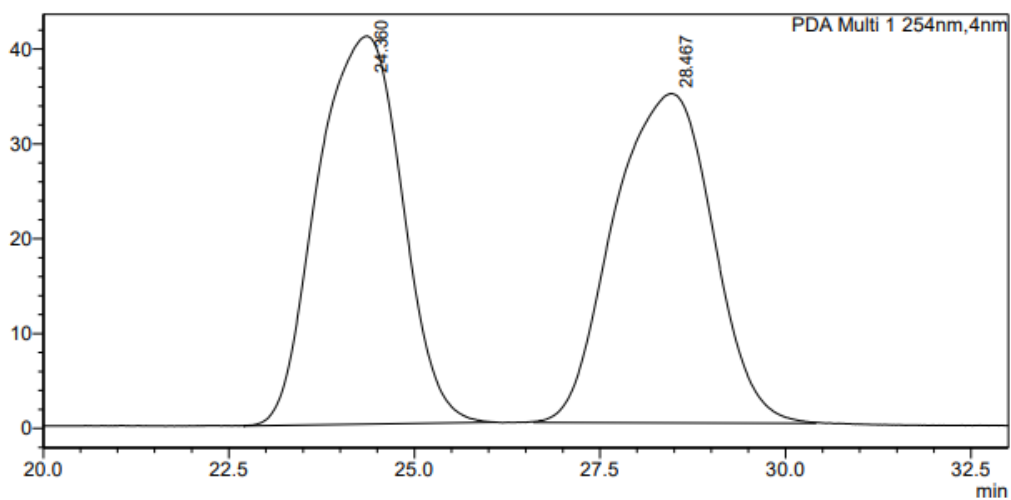

<Peak Table>

PDA Ch1 254nm

| Peak# | Ret. Time | Area    | Area%   | Height |
|-------|-----------|---------|---------|--------|
| 1     | 24.360    | 3242928 | 50.107  | 40902  |
| 2     | 28.467    | 3229109 | 49.893  | 34701  |
| Total |           | 6472037 | 100.000 | 75603  |



<Chromatogram>

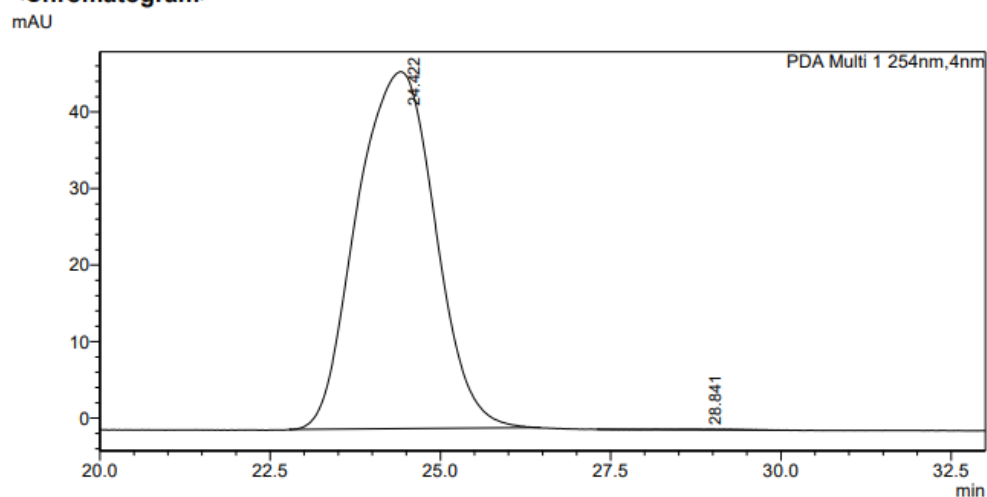

<Peak Table>

| PDA Ch1 254nm |           |         |         |        |
|---------------|-----------|---------|---------|--------|
| Peak#         | Ret. Time | Area    | Area%   | Height |
| 1             | 24.422    | 3736950 | 99.853  | 46633  |
| 2             | 28.841    | 5484    | 0.147   | 92     |
| Total         |           | 3742435 | 100.000 | 46725  |

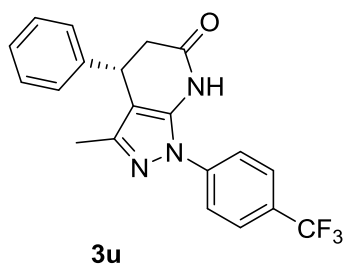

<Chromatogram>

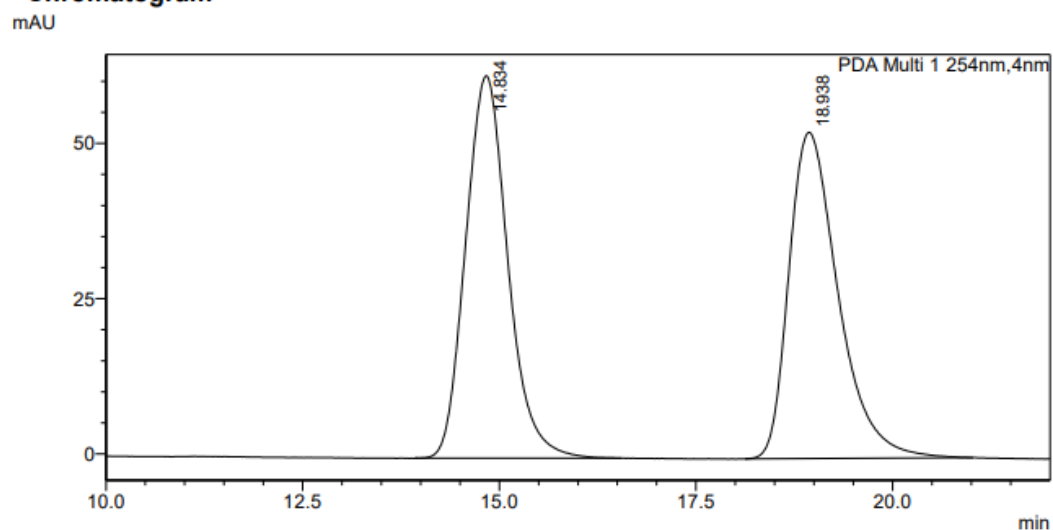

<Peak Table>

| PDA Ch1 254nm |           |         |         |        |
|---------------|-----------|---------|---------|--------|
| Peak#         | Ret. Time | Area    | Area%   | Height |
| 1             | 14.834    | 2296713 | 50.134  | 61524  |
| 2             | 18.938    | 2284434 | 49.866  | 52453  |
| Total         |           | 4581147 | 100.000 | 113977 |

### <Chromatogram>

mAU

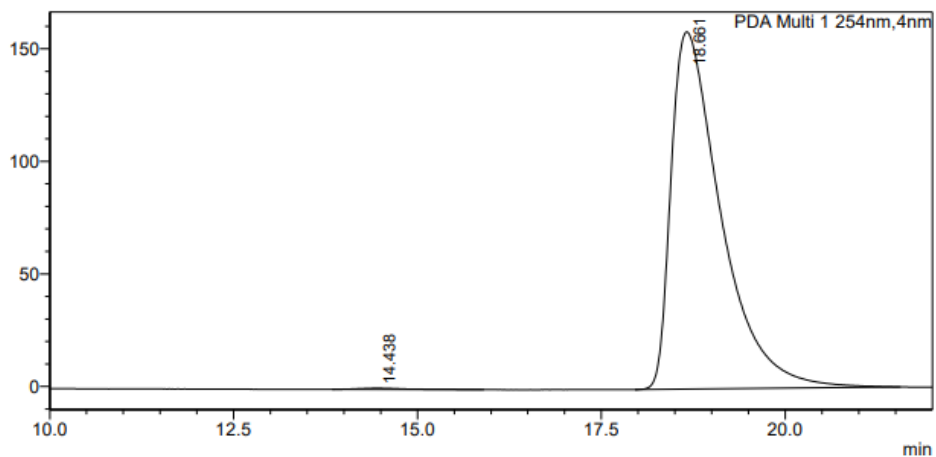

### <Peak Table>

PDA Ch1 254nm

| Peak# | Ret. Time | Area    | Area%   | Height |
|-------|-----------|---------|---------|--------|
| 1     | 14.438    | 25589   | 0.341   | 574    |
| 2     | 18.661    | 7486209 | 99.659  | 158602 |
| Total |           | 7511798 | 100.000 | 159175 |

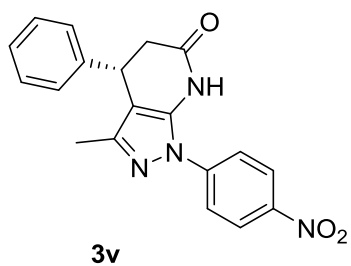

### <Chromatogram>

mAU

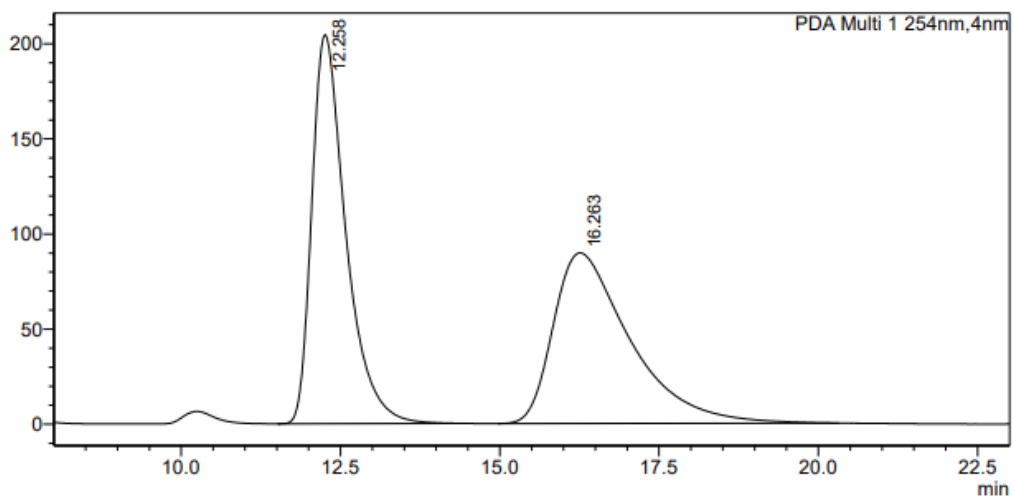

### <Peak Table>

PDA Ch1 254nm

| Peak# | Ret. Time | Area     | Area%   | Height |
|-------|-----------|----------|---------|--------|
| 1     | 12.258    | 7598966  | 50.239  | 204463 |
| 2     | 16.263    | 7526595  | 49.761  | 89669  |
| Total |           | 15125561 | 100.000 | 294133 |

<Chromatogram>

mAU

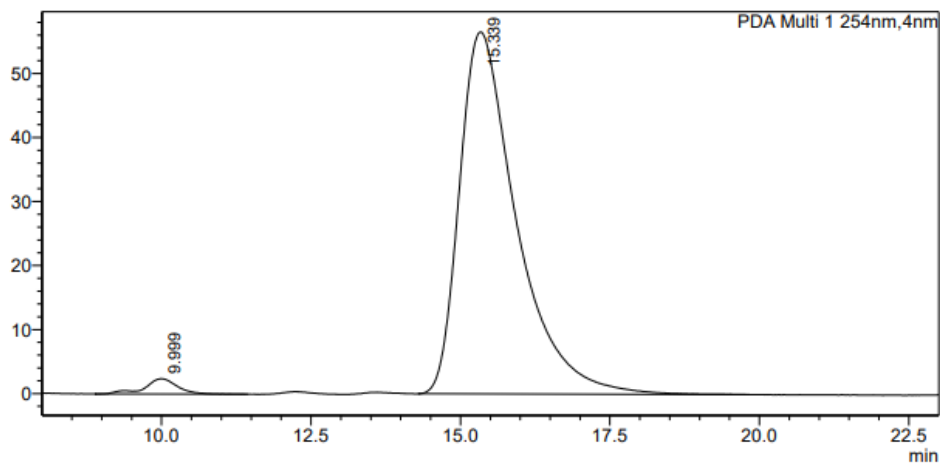

<Peak Table>

PDA Ch1 254nm

| Peak# | Ret. Time | Area    | Area%   | Height |
|-------|-----------|---------|---------|--------|
| 1     | 9.999     | 92720   | 2.413   | 2404   |
| 2     | 15.339    | 3749413 | 97.587  | 56530  |
| Total |           | 3842134 | 100.000 | 58934  |

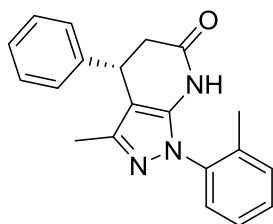

3w

<Chromatogram>

mAU

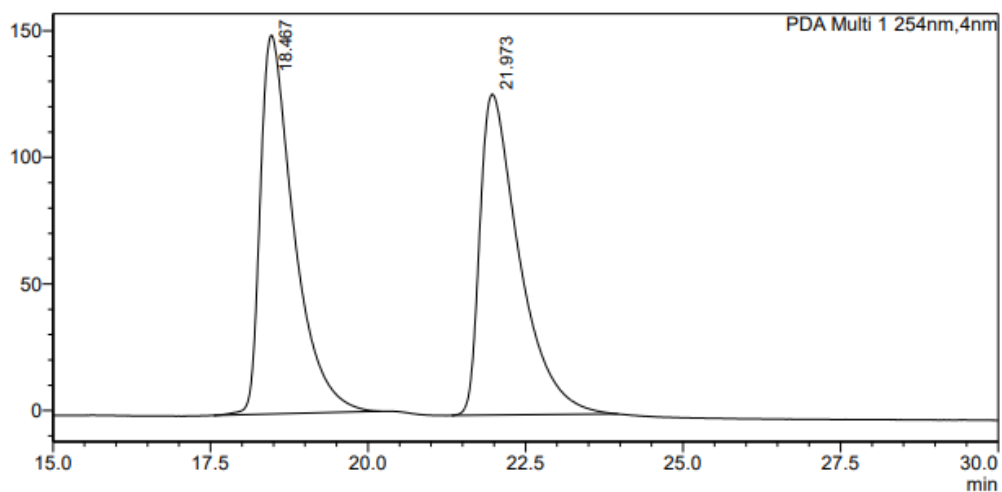

<Peak Table>

PDA Ch1 254nm

| Peak# | Ret. Time | Area     | Area%   | Height |
|-------|-----------|----------|---------|--------|
| 1     | 18.467    | 5551204  | 50.087  | 149571 |
| 2     | 21.973    | 5531862  | 49.913  | 126732 |
| Total |           | 11083065 | 100.000 | 276303 |

### <Chromatogram>

mAU

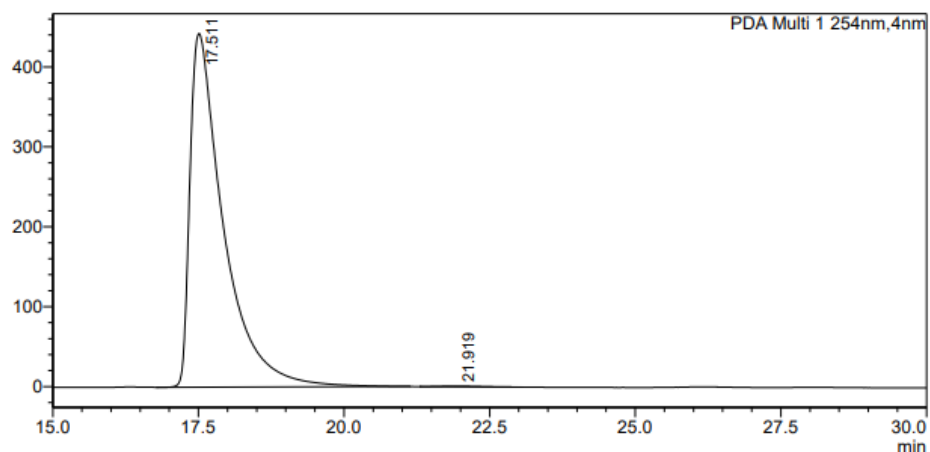

### <Peak Table>

PDA Ch1 254nm

| Peak# | Ret. Time | Area     | Area%   | Height |
|-------|-----------|----------|---------|--------|
| 1     | 17.511    | 17708337 | 99.773  | 442506 |
| 2     | 21.919    | 40221    | 0.227   | 847    |
| Total |           | 17748558 | 100.000 | 443354 |

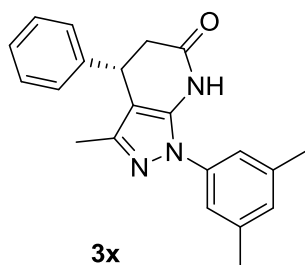

### <Chromatogram>

mAU

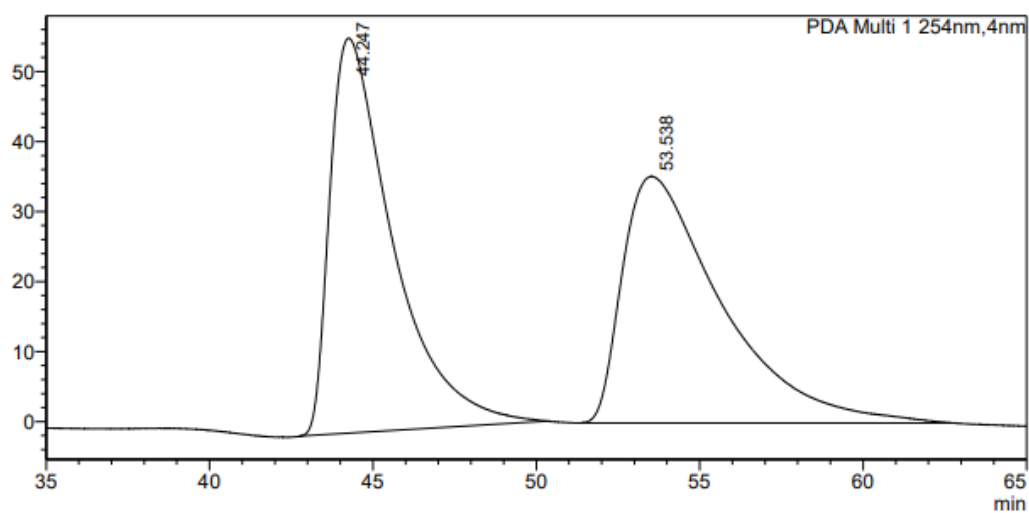

### <Peak Table>

PDA Ch1 254nm

| Peak# | Ret. Time | Area     | Area%   | Height |
|-------|-----------|----------|---------|--------|
| 1     | 44.247    | 7553116  | 50.373  | 56420  |
| 2     | 53.538    | 7441339  | 49.627  | 35224  |
| Total |           | 14994455 | 100.000 | 91644  |

### <Chromatogram>

mAU

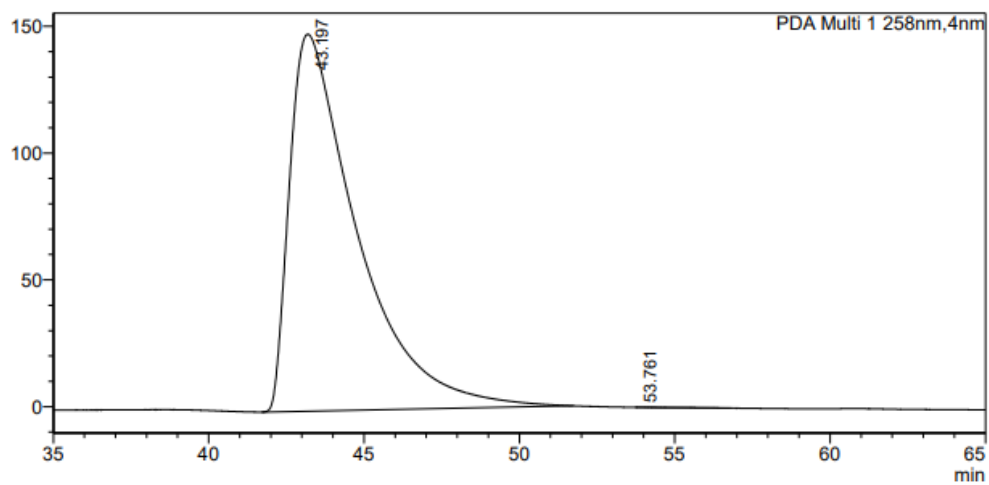

### <Peak Table>

PDA Ch1 258nm

| Peak# | Ret. Time | Area     | Area%   | Height |
|-------|-----------|----------|---------|--------|
| 1     | 43.197    | 22560969 | 99.975  | 148601 |
| 2     | 53.761    | 5737     | 0.025   | 3      |
| Total |           | 22566705 | 100.000 | 148604 |

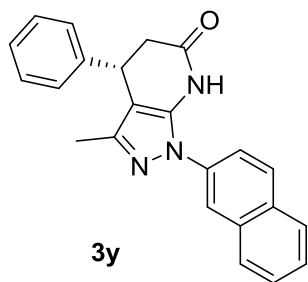

### <Chromatogram>

mAU

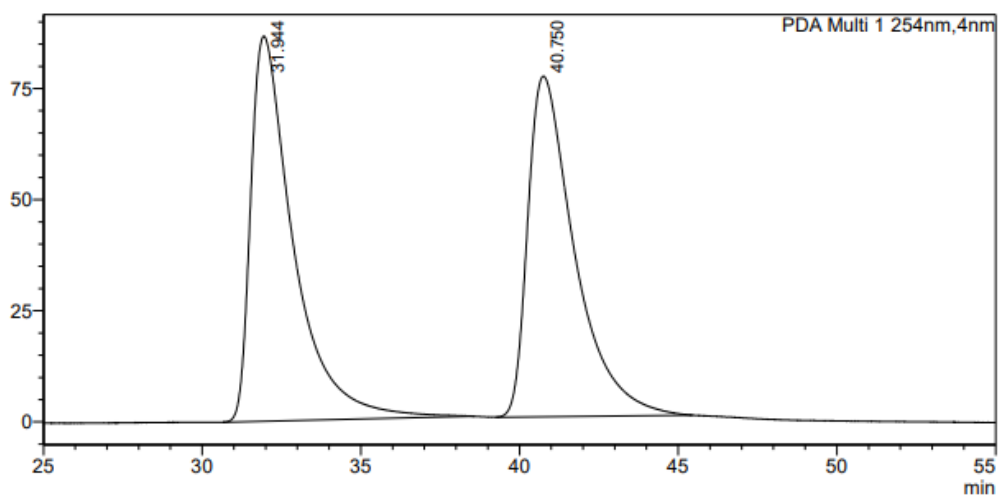

### <Peak Table>

PDA Ch1 254nm

| Peak# | Ret. Time | Area     | Area%   | Height |
|-------|-----------|----------|---------|--------|
| 1     | 31.944    | 8118664  | 50.837  | 86618  |
| 2     | 40.750    | 7851321  | 49.163  | 76621  |
| Total |           | 15969985 | 100.000 | 163240 |

<Chromatogram>

mAU

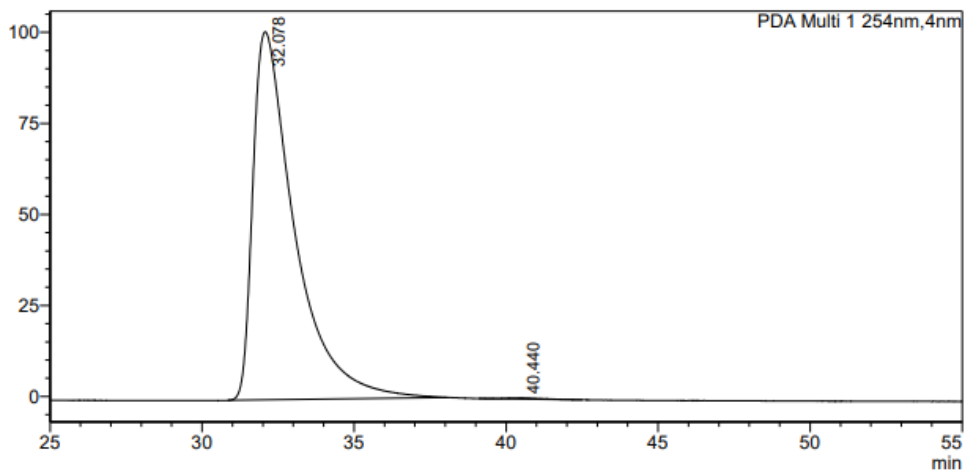

<Peak Table>

PDA Ch1 254nm

| Peak# | Ret. Time | Area    | Area%   | Height |
|-------|-----------|---------|---------|--------|
| 1     | 32.078    | 9648587 | 99.730  | 101092 |
| 2     | 40.440    | 26115   | 0.270   | 325    |
| Total |           | 9674703 | 100.000 | 101417 |

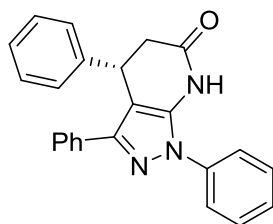

3z

<Chromatogram>

mAU

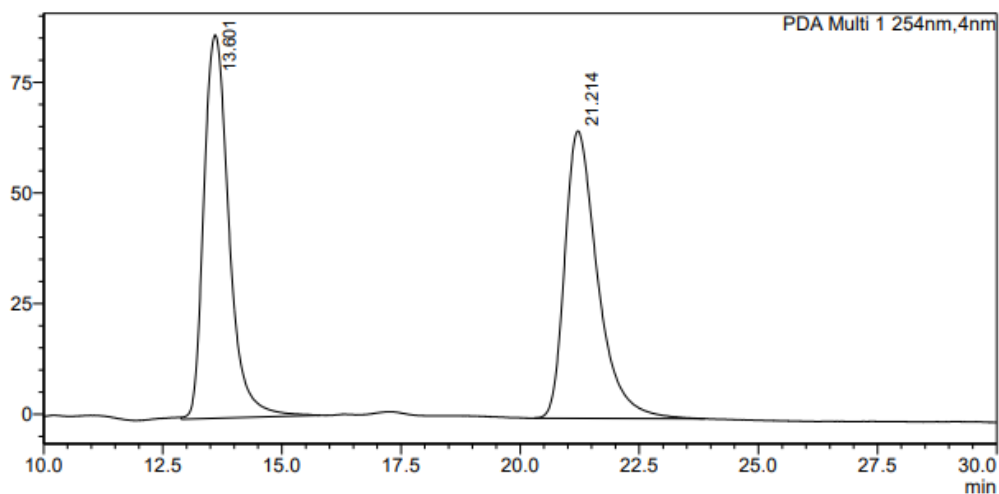

<Peak Table>

PDA Ch1 254nm

| Peak# | Ret. Time | Area    | Area%   | Height |
|-------|-----------|---------|---------|--------|
| 1     | 13.601    | 3174362 | 50.510  | 86631  |
| 2     | 21.214    | 3110238 | 49.490  | 64921  |
| Total |           | 6284600 | 100.000 | 151552 |

<Chromatogram>

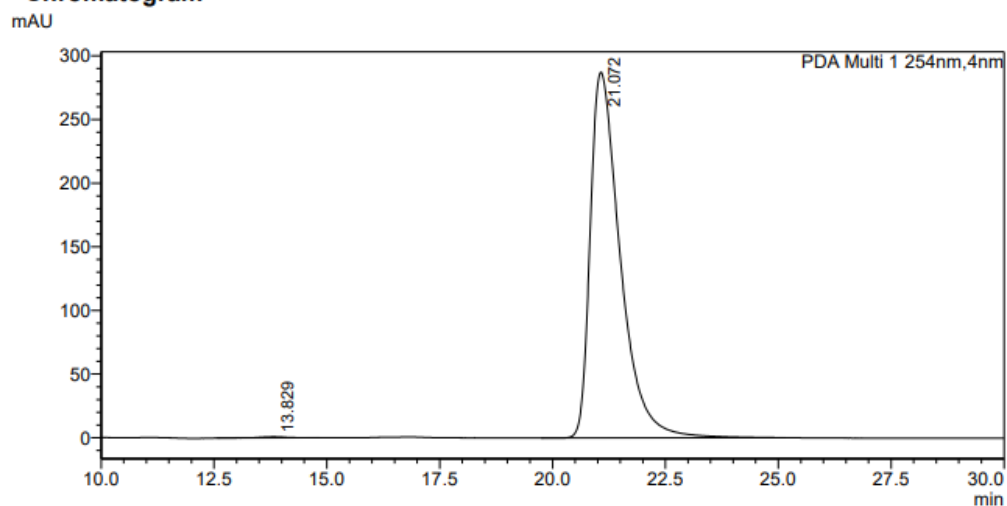

<Peak Table>

PDA Ch1 254nm

| Peak# | Ret. Time | Area     | Area%   | Height |
|-------|-----------|----------|---------|--------|
| 1     | 13.829    | 35639    | 0.268   | 829    |
| 2     | 21.072    | 13276800 | 99.732  | 287278 |
| Total |           | 13312440 | 100.000 | 288107 |

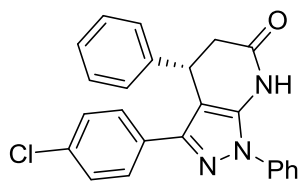

3aa

<Chromatogram>

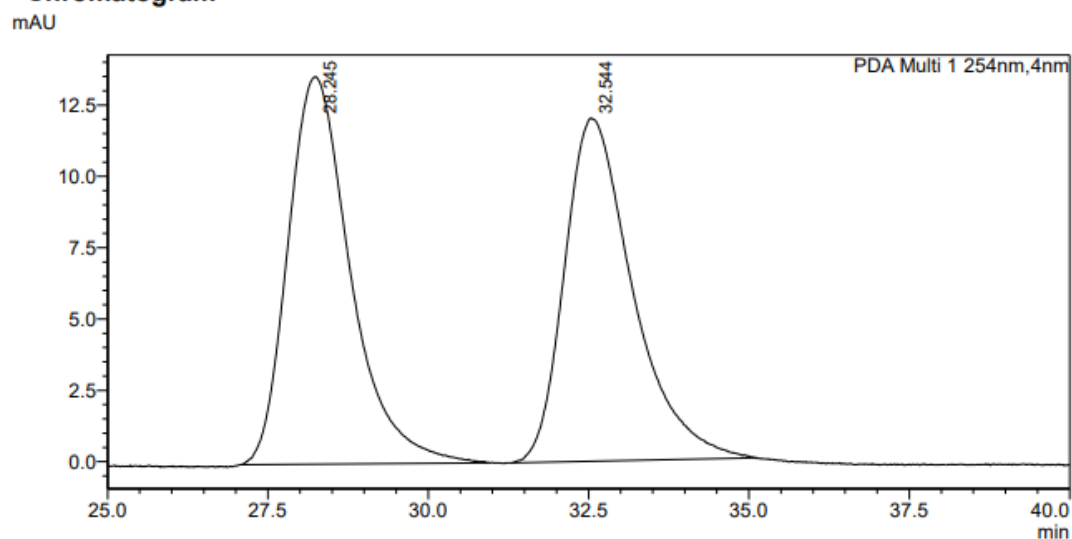

<Peak Table>

PDA Ch1 254nm

| Peak# | Ret. Time | Area    | Area%   | Height |
|-------|-----------|---------|---------|--------|
| 1     | 28.245    | 921229  | 50.857  | 13579  |
| 2     | 32.544    | 890190  | 49.143  | 12030  |
| Total |           | 1811418 | 100.000 | 25609  |

### <Chromatogram>

mAU

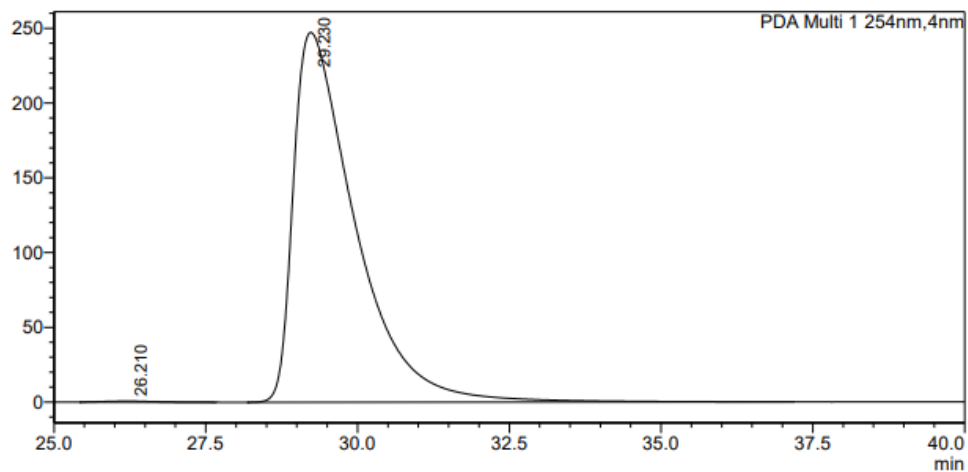

### <Peak Table>

PDA Ch1 254nm

| Peak# | Ret. Time | Area     | Area%   | Height |
|-------|-----------|----------|---------|--------|
| 1     | 26.210    | 37497    | 0.214   | 660    |
| 2     | 29.230    | 17524854 | 99.786  | 247341 |
| Total |           | 17562351 | 100.000 | 248001 |

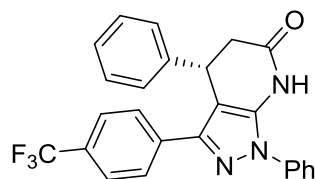

3ab

### <Chromatogram>

mAU

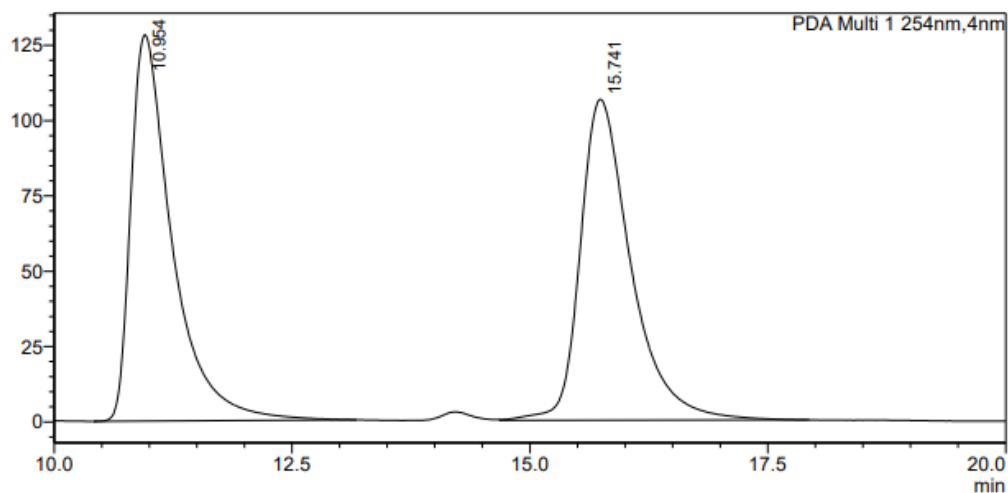

### <Peak Table>

PDA Ch1 254nm

| Peak# | Ret. Time | Area    | Area%   | Height |
|-------|-----------|---------|---------|--------|
| 1     | 10.954    | 3885168 | 49.554  | 128222 |
| 2     | 15.741    | 3955114 | 50.446  | 106498 |
| Total |           | 7840282 | 100.000 | 234720 |



### <Chromatogram>

mAU

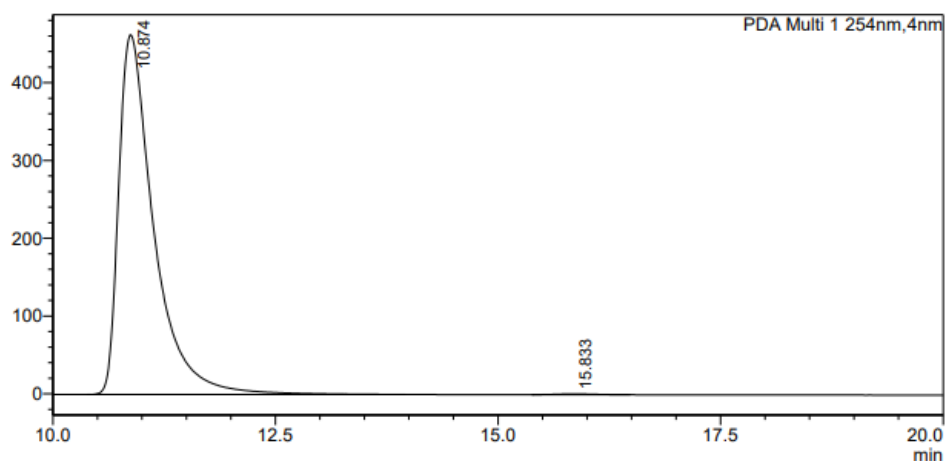

### <Peak Table>

PDA Ch1 254nm

| Peak# | Ret. Time | Area     | Area%   | Height |
|-------|-----------|----------|---------|--------|
| 1     | 10.874    | 12704409 | 99.754  | 462468 |
| 2     | 15.833    | 31332    | 0.246   | 1002   |
| Total |           | 12735741 | 100.000 | 463470 |

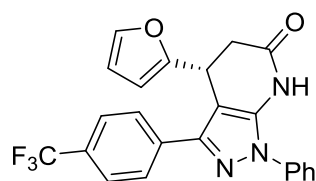

3ac

### <Chromatogram>

mAU

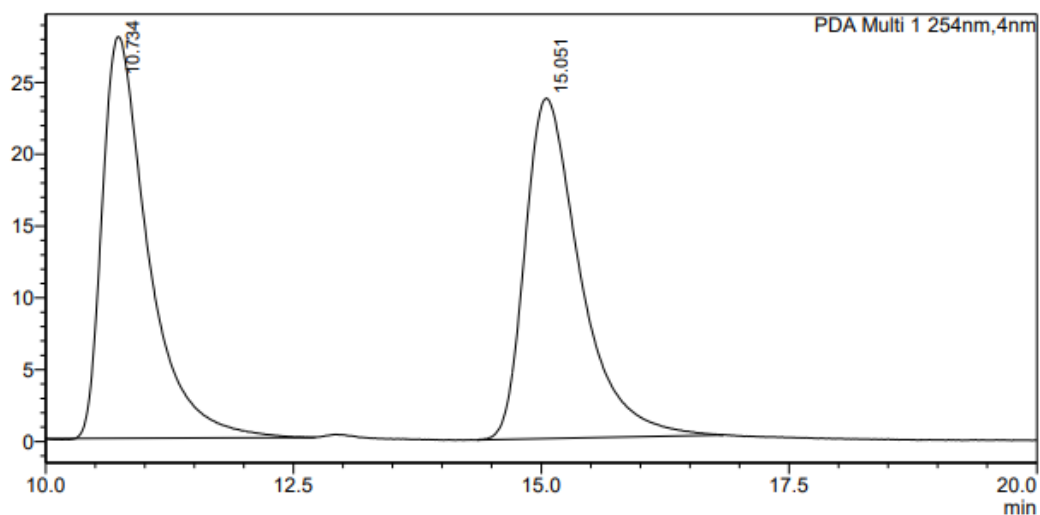

### <Peak Table>

PDA Ch1 254nm

| Peak# | Ret. Time | Area    | Area%   | Height |
|-------|-----------|---------|---------|--------|
| 1     | 10.734    | 900652  | 49.479  | 27962  |
| 2     | 15.051    | 919611  | 50.521  | 23692  |
| Total |           | 1820262 | 100.000 | 51655  |

### <Chromatogram>

mAU

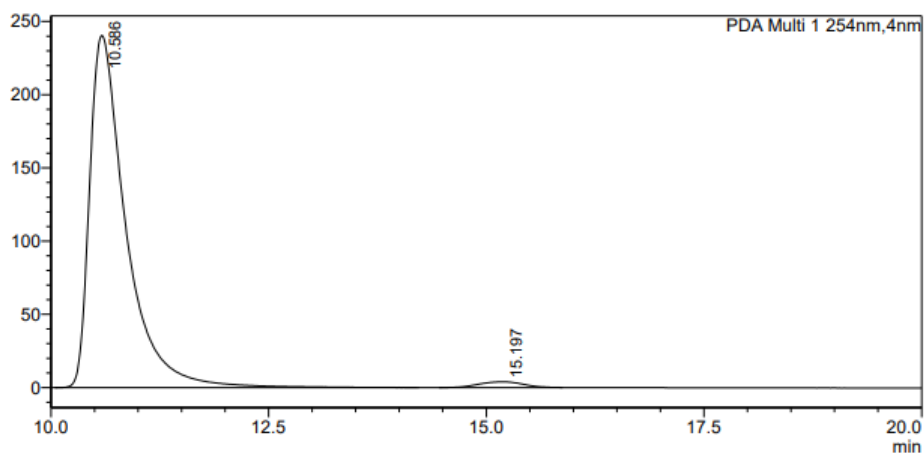

### <Peak Table>

PDA Ch1 254nm

| Peak# | Ret. Time | Area    | Area%   | Height |
|-------|-----------|---------|---------|--------|
| 1     | 10.586    | 6982109 | 98.051  | 240462 |
| 2     | 15.197    | 138805  | 1.949   | 3925   |
| Total |           | 7120914 | 100.000 | 244386 |

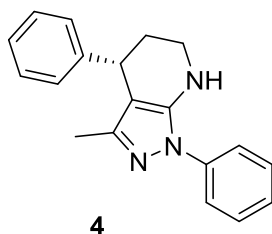

### <Chromatogram>

mAU

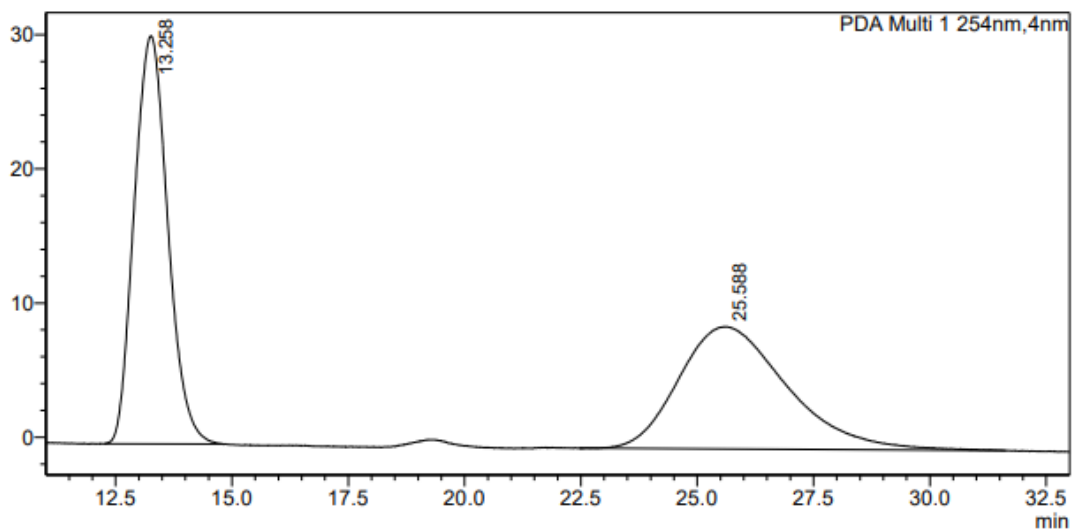

### <Peak Table>

PDA Ch1 254nm

| Peak# | Ret. Time | Area    | Area%   | Height |
|-------|-----------|---------|---------|--------|
| 1     | 13.258    | 1526313 | 50.907  | 30399  |
| 2     | 25.588    | 1471900 | 49.093  | 9108   |
| Total |           | 2998213 | 100.000 | 39507  |

<Chromatogram>

mAU

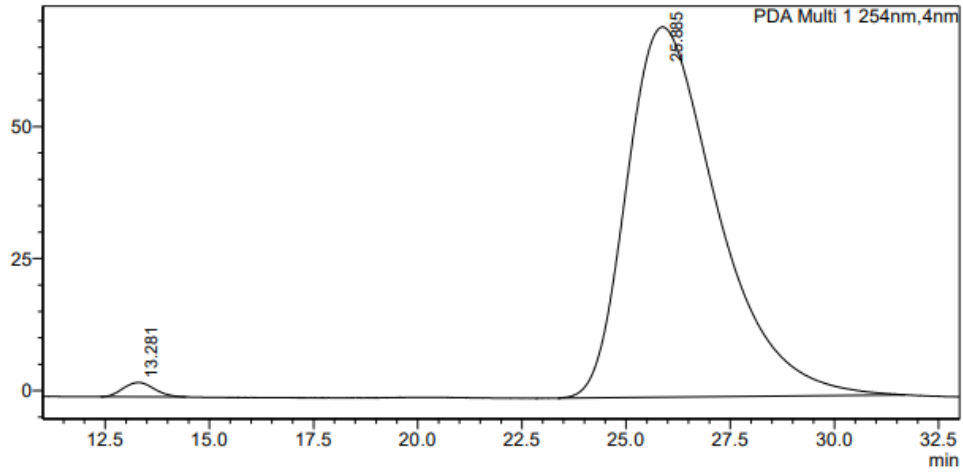

<Peak Table>

PDA Ch1 254nm

| Peak# | Ret. Time | Area     | Area%   | Height |
|-------|-----------|----------|---------|--------|
| 1     | 13.281    | 140287   | 1.305   | 2708   |
| 2     | 25.885    | 10609471 | 98.695  | 70079  |
| Total |           | 10749758 | 100.000 | 72787  |

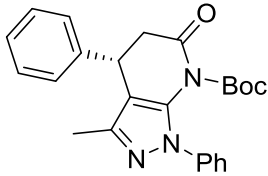

5

<Chromatogram>

mAU

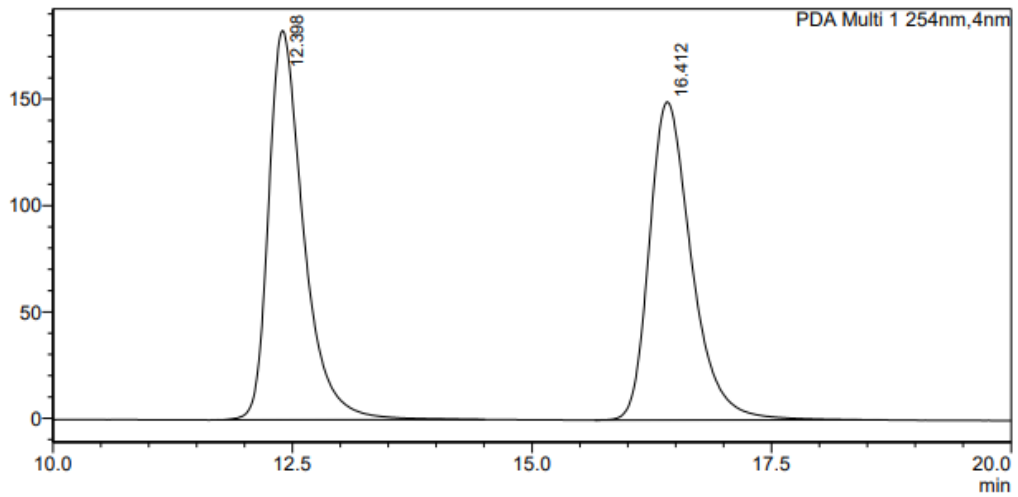

<Peak Table>

PDA Ch1 254nm

| Peak# | Ret. Time | Area    | Area%   | Height |
|-------|-----------|---------|---------|--------|
| 1     | 12.398    | 4652174 | 50.321  | 182915 |
| 2     | 16.412    | 4592839 | 49.679  | 149562 |
| Total |           | 9245014 | 100.000 | 332477 |

<Chromatogram>

mAU

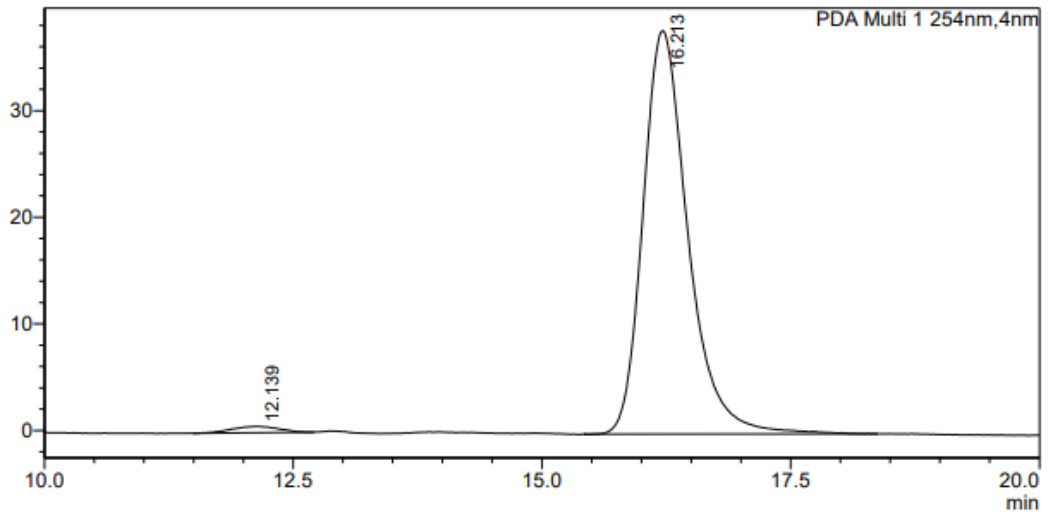

<Peak Table>

PDA Ch1 254nm

| Peak# | Ret. Time | Area    | Area%   | Height |
|-------|-----------|---------|---------|--------|
| 1     | 12.139    | 19513   | 1.611   | 603    |
| 2     | 16.213    | 1191912 | 98.389  | 37840  |
| Total |           | 1211425 | 100.000 | 38443  |
